# Supplementary material for: Recognition of Higher Fullerene Isomers with Low-Symmetry Coordination Cages
Source: Research Square preprint supplement (doi:10.21203/rs.3.rs-3757904/v1), 2024-01-26
Supplement: Supplementary file 1 [file b333cd21538a33dc165d47a5.pdf]

**Recognition of Higher Fullerene Isomers with Low-Symmetry Coordination Cages**

Xiao-Qing Guo<sup>1†</sup>, Pengwei Yu<sup>3†</sup>, Li-Peng Zhou<sup>1</sup>, Shao-Jun Hu<sup>1</sup>, Xiao-Fang Duan<sup>1,2</sup>, Li-Xuan Cai<sup>1</sup>, Lipiao Bao<sup>3</sup>, Xing Lu<sup>3\*</sup>, Qing-Fu Sun<sup>1,2\*</sup>

**Affiliations:**

<sup>1</sup>State Key Laboratory of Structural Chemistry, Fujian Institute of Research on the Structure of Matter, Chinese Academy of Sciences, Fuzhou 350002, PR China.

<sup>2</sup>University of Chinese Academy of Sciences, Beijing 100049, PR China.

<sup>3</sup>State Key Laboratory of Materials Processing and Die & Mould Technology, School of Materials Science and Engineering, Huazhong University of Science and Technology, 1037 Luoyu Road, Wuhan, 430074, PR China.

\*Corresponding author. lux@hust.edu.cn; qfsun@fjirsm.ac.cn.

†These authors contributed equally to this work.

## Table of Content

|                                                                              |    |
|------------------------------------------------------------------------------|----|
| 1. Materials and Methods.....                                                | 4  |
| 2. X-ray Crystallography .....                                               | 4  |
| 3. Synthesis and Characterization .....                                      | 15 |
| 3.1 Synthesis of ligands .....                                               | 16 |
| 3.1.1 Synthesis of ligand $C_3$ - <b>1</b> .....                             | 16 |
| 3.1.2 Synthesis of ligand $C_1$ - <b>2</b> .....                             | 20 |
| 3.2 Synthesis of pseudo-cubic cages.....                                     | 24 |
| 3.2.1 Synthesis of cage $T$ - <b>3</b> .....                                 | 24 |
| 3.2.2 Synthesis of cage $S_4$ - <b>4</b> .....                               | 29 |
| 3.3 Host–guest complexes with fullerenes.....                                | 33 |
| 3.3.1 Encapsulation of $C_{60}$ with $T$ - <b>3</b> .....                    | 33 |
| 3.3.2 Encapsulation of $C_{70}$ with $T$ - <b>3</b> .....                    | 38 |
| 3.3.3 Encapsulation of $D_2$ - $C_{76}$ with $T$ - <b>3</b> .....            | 43 |
| 3.3.4 Encapsulation of $C_{2v}$ - $C_{78}$ with $T$ - <b>3</b> .....         | 47 |
| 3.3.5 Encapsulation of $C_{2v}'$ - $C_{78}$ with $T$ - <b>3</b> .....        | 49 |
| 3.3.6 Encapsulation of $C_{60}$ with $S_4$ - <b>4</b> .....                  | 52 |
| 3.3.7 Encapsulation of $C_{70}$ with $S_4$ - <b>4</b> .....                  | 58 |
| 3.3.8 Encapsulation of $D_2$ - $C_{76}$ with $S_4$ - <b>4</b> .....          | 64 |
| 3.3.9 Encapsulation of $C_{2v}$ - $C_{78}$ with $S_4$ - <b>4</b> .....       | 68 |
| 3.3.10 Encapsulation of $C_{2v}'$ - $C_{78}$ with $S_4$ - <b>4</b> .....     | 72 |
| 4. Assembly Behavior of Low-Symmetry Cage .....                              | 75 |
| 5. Conformation Analysis of $P$ -2 .....                                     | 76 |
| 6. Stereoisomer Analysis of Pseudo-Cubic Cages .....                         | 79 |
| 6.1 Stereoisomers of $La_4(C_3$ - <b>1</b> ) $_4$ .....                      | 79 |
| 6.2 Stereoisomers of $La_4(C_1$ - <b>2</b> ) $_4$ .....                      | 80 |
| 7. Volume and Sphericity Calculation .....                                   | 89 |
| 8. Enantioseparation and Configuration Assignment of $P$ -1 and $M$ -1 ..... | 91 |
| 8.1 Chiral HPLC separation for $C_3$ - <b>1</b> .....                        | 91 |
| 8.2 Circular dichroism .....                                                 | 91 |
| 8.3 Absolute configuration determination by X-ray crystallography .....      | 92 |



|                                                                                     |     |
|-------------------------------------------------------------------------------------|-----|
| 9. Synthesis and Characterization of Fullerene Isomers .....                        | 93  |
| 9.1 Preparation and isolation.....                                                  | 93  |
| 9.2 Crystallographic characterizations.....                                         | 94  |
| 10. Comparison of Recognition Sensitivity for Higher Fullerene Isomers .....        | 95  |
| 11. Orientation Analysis of Host–guest Complexes .....                              | 99  |
| 11.1 Theoretical calculation of binding energy .....                                | 99  |
| 11.2 Binding energy of $D_2$ - $C_{76}\subset S_4$ - <b>4</b> .....                 | 99  |
| 11.3 Binding energy of $C_{2v}$ - $C_{78}\subset S_4$ - <b>4</b> .....              | 100 |
| 12. Analysis of Host–Guest Interactions .....                                       | 103 |
| 12.1 Quantitative analysis of host–guest interactions with Hirshfeld surfaces ..... | 103 |
| 12.2 Host–Guest interactions analysis with IGM .....                                | 105 |
| 13. Binding Constant Determination .....                                            | 106 |
| 13.1 General procedure.....                                                         | 106 |
| 13.2 Binding constant for $C_{60}$ guest.....                                       | 107 |
| 13.3 Binding constant for $C_{70}$ guest.....                                       | 108 |
| 13.4 Binding constant for $C_{76}$ guest.....                                       | 109 |
| 13.5 Binding constant for $C_{2v}$ - $C_{78}$ guest.....                            | 110 |
| 13.6 Binding constant for $C_{2v}$ '- $C_{78}$ guest.....                           | 110 |
| 14. Supplemental Figures and Tables for Crystal Data .....                          | 112 |
| 15. References.....                                                                 | 124 |

## 1. Materials and Methods

**Materials.** Unless otherwise stated, all chemicals and solvents were purchased from commercial companies and used as received. Deuterated solvents were purchased from Adamas, J&K scientific and Sigma-Aldrich. Fullerenes isomers ( $D_2$ - $C_{76}$ ,  $C_{2v}$ - $C_{78}$ , and  $C_{2v}'$ - $C_{78}$ ) were synthesized by arc-discharge method and separated by multi-stage HPLC process with toluene as the eluent (See section 9 for detailed synthetic details).

**NMR measurements.** 1D and 2D-NMR spectra were measured on Bruker-Biospin Avance III HD (400 MHz) and JEOL ECZ600S (600 MHz) spectrometer. Variable-temperature  $^1\text{H}$ -NMR spectra were measured on JEOL ECZ600S spectrometer.  $^1\text{H}$ -NMR chemical shifts were determined with respect to residual signals of the deuterated solvents used.

**MS measurements.** ESI-TOF-MS were recorded on an Impact II UHR-TOF mass spectrometry from Bruker, with tuning mix as the internal standard. Data analysis was conducted with the Bruker Data Analysis software (Version 4.3) and simulations were performed with the Bruker Isotope Pattern software.

**Cavity volume calculation.** The cavity volumes of the complexes were calculated based on MoloVol calculations (<https://molovol.com/>)<sup>S1</sup> using single probe mode (Small probe radius: 2.4 Å; Grid resolution: 0.2 Å; Optimization depth: 4). For fullerene molecules, the program parameters were set as follows: small probe radius: 1.2 Å; Grid resolution: 0.2 Å; Optimization depth: 4. The corresponding graphics were generated with PyMOL software.<sup>S2</sup>

**Enantiomeric separation.** HPLC analyses were performed on the SHIMADZU LC-20A instrument with a chiral Enantiopak<sup>®</sup>SDMP column (4.6\*250 mm, 5µm). Racemic  $C_3$ -**1** was separated on a Waters Prep 150 LC instrument with a chiral Enantiopak<sup>®</sup>SDMP column (10.0\*250 mm, 5µm).

## 2. X-ray Crystallography

Single crystal X-ray diffraction data for ligand  $C_3$ -**1**, empty cages **T-3** and **4** were collected on a Bruker D8 VENTURE photon II diffractometer with Iµs 3.0 microfocus X-ray source using Mo  $K\alpha$  radiation ( $\lambda = 0.71073$  Å). Data reduction was performed with the saint and SADABS package.<sup>S3</sup> The X-ray diffraction for **P-1** was carried out on a micro-focus metal jet diffractometer using Ga  $K\alpha$  radiation ( $\lambda = 1.3405$  Å). Data reduction was performed with the CrysAlisPro package.<sup>S4</sup> Limited to the very weakly diffraction of the giant supramolecular assembly in nature, the X-ray diffraction studies for host–guest complexes  $C_{60}\subset S_4$ -**4** and  $C_{70}\subset S_4$ -**4** were carried out on BL17B macromolecular crystallography beamline in Shanghai Synchrotron Radiation Facility (SSRF). The collected diffraction data were processed with the HKL 3000 software. The structures were solved by direct methods and refined by full-matrix least-squares

on  $F^2$  with anisotropic displacement using the SHELXTL software package.<sup>S5</sup> Carbon-bound hydrogen atoms have been positioned in accordance with idealized parameters and subjected to refinement utilizing a riding model. Disorder was modelled using standard crystallographic methods encompassing constraints, restraints and rigid-body modeling where necessary. Details on crystal data collection and refinement were summarized in Table S15–S22. CCDC: 2307962-2307967 contains the supplementary crystallographic data for this paper. These data can be obtained free of charge via [www.ccdc.cam.ac.uk/conts/retrieving.html](http://www.ccdc.cam.ac.uk/conts/retrieving.html) (or from the Cambridge Crystallographic Data Centre, 12 Union Road, Cambridge CB21EZ, UK; fax: (+44) 1223-336-033; or [deposit@ccdc.cam.ac.uk](mailto:deposit@ccdc.cam.ac.uk)).

## 2.1 Crystal data for $C_3$ -1:

Triclinic space group  $P-1$ ,  $a = 9.276(4)$  Å,  $b = 17.092(7)$  Å,  $c = 20.259(8)$  Å,  $\alpha = 102.897(12)^\circ$ ,  $\beta = 90.871(12)^\circ$ ,  $\gamma = 105.056(12)^\circ$ ,  $V = 3014(2)$  Å<sup>3</sup>,  $Z = 2$ ,  $T = 140(2)$  K. Anisotropic least-squares refinement for the framework atoms and isotropic refinement for the other atoms on 10613 independent merged reflections ( $R_{int} = 0.1521$ ) converged at residual  $wR_2 = 0.3390$  for all data; residual  $R_1 = 0.0942$  for 5830 observed data [ $I > 2\sigma(I)$ ], and goodness of fit (GOF) = 1.104.

### *Specific refinement details:*

Suitable crystals of the racemic ligand  $C_3$ -1 for X-ray diffraction were obtained by slowly volatilizing a mixed solution of ligands in n-hexane/isopropanol (v/v = 1/1) at room temperature. Upon retrieval from the mother liquid, the crystal is expeditiously enveloped in crystal oil, followed by the swift acquisition of data within an environment purged with liquid nitrogen. The utmost attainable resolution of the diffraction data is 1.0 Å when the signal-to-noise ratio exceeds 1.8. The asymmetric unit was found to comprise one complete  $C_3$ -1 and two bonded water molecules.

Due to significant thermal motion within the structure, thermal parameter restraints (SIMU, DELU) were applied to all atoms. Adding H-atoms onto isolated oxygen atoms led to A-level alerts (indicating proximity to surrounding atoms). As a result, we chose not to add H-atoms during the refinement process.

CheckCIF gives two B-level alerts, all of which result from missing H-atoms on isolated oxygen atoms.

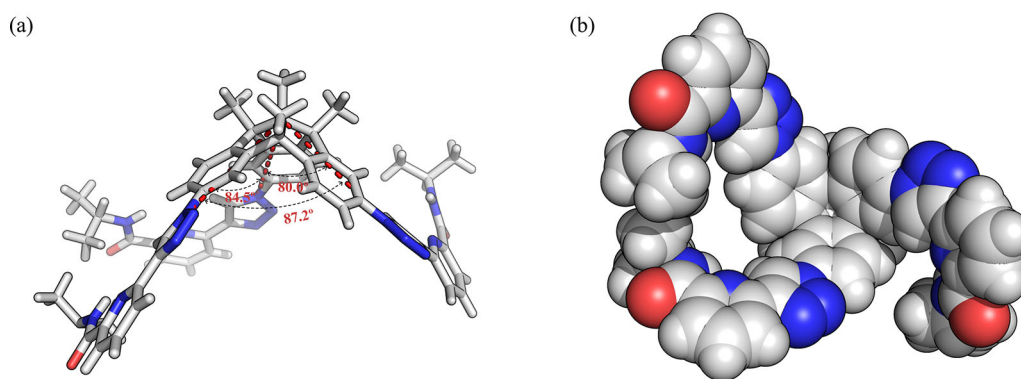

Fig. S1. (a) Cone-shaped 3D stereostructure of  $C_3$ -1. (b) Space-filling representation of  $C_3$ -1. Solvents are omitted for clarity.

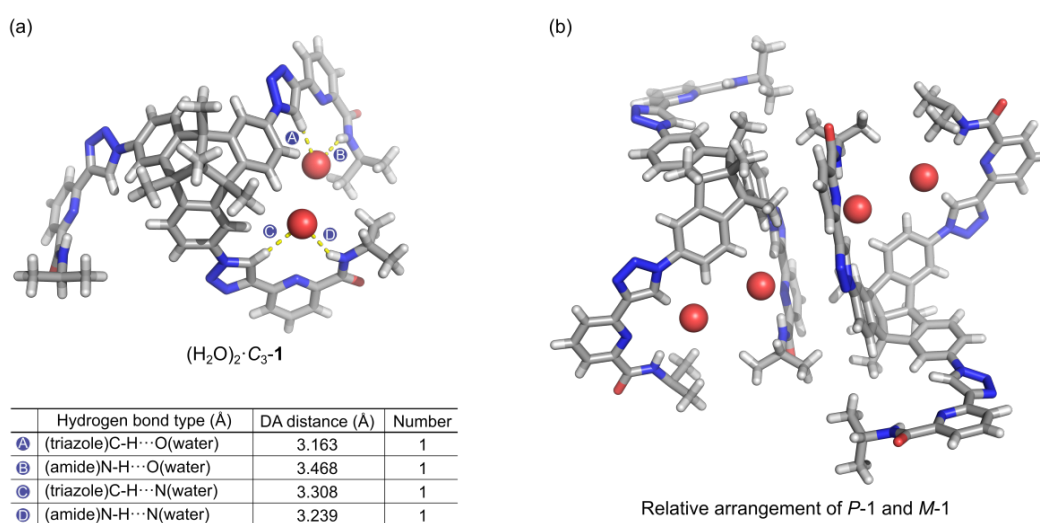

Fig. S2. (a)  $C_3$ -1 binds two water molecules via multiple H-bond interactions. (b) Coexistence of *P* and *M* configuration ligand  $C_3$ -1 in the unit cell.

## 2.2 Crystal data for homochiral *P*-1:

Trigonal space group  $R\bar{3}$ ,  $a = 23.5481(9)$  Å,  $b = 23.5481(9)$  Å,  $c = 12.9841(5)$  Å,  $\alpha = \beta = 90^\circ$ ,  $\gamma = 120^\circ$ ,  $V = 6235.3(5)$  Å<sup>3</sup>,  $Z = 3$ ,  $T = 293(2)$  K. Anisotropic least-squares refinement for the framework atoms and isotropic refinement for the other atoms on 4155 independent merged reflections ( $R_{int} = 0.1529$ ) converged at residual  $wR_2 = 0.3883$  for all data; residual  $R_I = 0.1572$  for 2980 observed data [ $I > 2\sigma(I)$ ], and goodness of fit (GOF) = 1.468.

### Specific refinement details:

Crystals of the homochiral  $C_3$ -symmetric *P*-1 for X-ray diffraction were obtained by slow volatilization of the chloroform solution of ligand at room temperature. To establish the absolute configuration of the crystal, distinct diffraction experiments employing Cu or Ga  $K\alpha$  radiation were conducted. Regrettably, the data derived from the Cu  $K\alpha$  radiation exhibited limited diffraction resolution ( $> 1.2$  Å), coupled with a

large Flack parameter (0.288). In contrast, the employment of Ga K $\alpha$  radiation yielded a resolution of 1.0 Å and more lower Flack value (0.047), elucidating the absolute *P* configuration. The asymmetric unit was found to comprise one third of *P*-**1**, one third of a chloroform molecule, and two free chloroform molecules.

Due to the thermal motion of the free chloroform molecules, thermal parameter restraints (ISOR) were applied to confine the refinement of chlorine atoms to an approximately isotropic manner. Bond length and angle restraints were also applied to the three free chloroform molecules.

CheckCIF gives seven B-level alerts, all of which result from the disorder of the free chloroform molecules (high *R*1 and *wR*2 value, large average *U*<sub>eq</sub> of residue around chloroform atoms) and the limited resolution ( $\sin(\theta_{\max})/\lambda < 0.575$ , low bond precision).

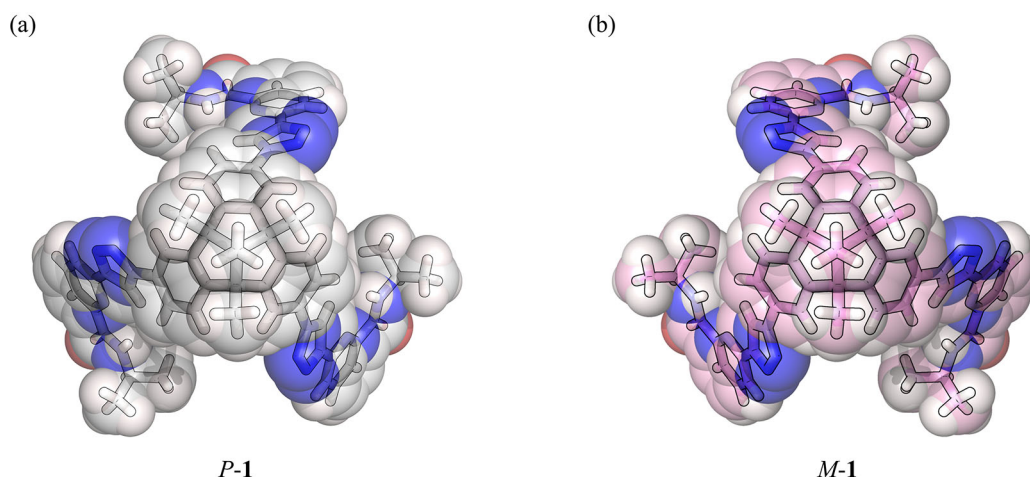

Fig. S3. (a) Space-filling and stick representations of *P*-configuration crystal structure of ligand *C*<sub>3</sub>-**1**. Solvents are omitted for clarity. (b) Space-filling and stick representations of *M*-configuration molecular modeling of ligand *C*<sub>3</sub>-**1**.

### 2.3 Crystal data for *T*-**3**:

Orthorhombic space group *Pccn*, *a* = 22.156(2) Å, *b* = 23.722(3) Å, *c* = 80.692(9) Å,  $\alpha = \beta = \gamma = 90^\circ$ , *V* = 42411(8) Å<sup>3</sup>, *Z* = 4, *T* = 273(2) K. Anisotropic least-squares refinement for the framework atoms and isotropic refinement for the other atoms on 21539 independent merged reflections (*R*<sub>int</sub> = 0.2216) converged at residual *wR*<sub>2</sub> = 0.3254 for all data; residual *R*<sub>*I*</sub> = 0.1056 for 10971 observed data [*I* > 2σ(*I*)], and goodness of fit (GOF) = 0.970.

#### *Specific refinement details:*

The crystals for empty cages *T*-**3** were obtained by slow diffusion of dichloromethane vapor into the corresponding complexes solution (CH<sub>3</sub>CN/MeOH, v/v 4/1) at room temperature over one month. Upon isolating the crystal from the mother liquid, it will be rapidly weathered. Consequently, we sealed the crystal in a capillary tube filled with

the mother liquid before testing. The completeness of the diffraction data can reach 97%. The asymmetric unit was found to comprise two complete *C*<sub>3</sub>-**1** molecules and associated counterions.

Owing to substantial thermal motion within the structure, we imposed constraints (SAME) on the bond lengths and angles of chemically identical organic ligand pairs to ensure their mutual similarity. Additionally, thermal parameter restrictions (SIMU, DELU) were extended to all atoms, excluding lanthanum. Bond length and angle limitations (DFIX) were also administered to the peripheral isopropylamine groups and middle TBTQ skeletons. Furthermore, the pyridine and triazole components were modeled as rigid groups to enhance structural accuracy, employing the specific constraints (AFIX 66, AFIX 56).

Because of the large number of amorphous solvents and highly-disordered counterions existing in the unit cell, which occupy as much as 52.6% of the unit cell for *T*-**3** according to PLATON/SOLV calculation, the final R factor was slightly high. The residual electron intensities arising from these amorphous solvents and highly-disordered counterions were removed using the PLATON/SQUEEZE routine.<sup>S6, S7</sup>

CheckCIF gives two A-level alerts, one stems from the inherent weak diffraction ability of the crystal, and the remaining one arises from the high beamstop theta(min) limit set. Additionally, CheckCIF reports five B-level alerts, all of which result from the limited resolution of the data (high Rint value), thermal motion (or minor unresolved disorder) of counterions (large average Ueq of residue around sulfur atoms on counterions).

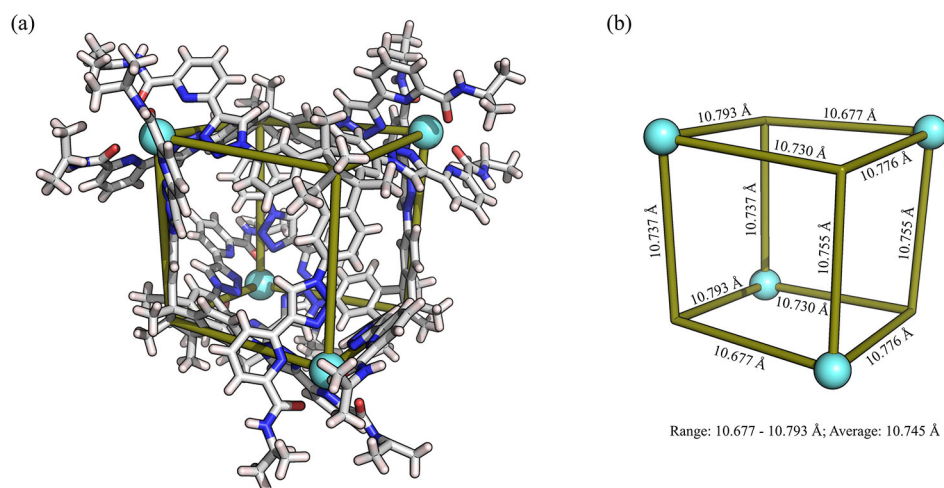

*Fig. S4.* (a) Cationic part of the crystal structure of *T*-**3**. (b) Simplified pseudo-cube from *T*-**3**. Counterions are omitted for clarity. ( $\Delta$  handedness La centers, pale cyan sphere)

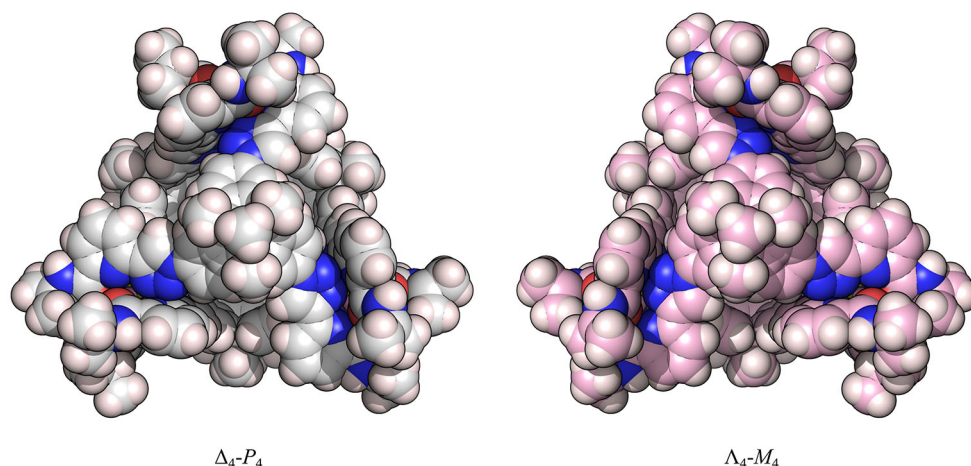

Fig. S5. Space-filling representations of the enantiopure  $\Delta_4$ - $P_4$  and  $\Lambda_4$ - $M_4$  within the crystal structure of **T-3**. Counterions are omitted for clarity.

#### 2.4 Crystal data for **4**:

Monoclinic space group  $C2/m$ ,  $a = 62.910(10)$  Å,  $b = 36.326(6)$  Å,  $c = 36.322(5)$  Å,  $\alpha = 90^\circ$ ,  $\beta = 125.26^\circ$ ,  $\gamma = 90^\circ$ ,  $V = 67780(18)$  Å<sup>3</sup>,  $Z = 4$ ,  $T = 278$  K. Anisotropic least-squares refinement for the framework atoms and isotropic refinement for the other atoms on 13201 independent merged reflections ( $R_{int} = 0.327$ ) converged at residual  $wR_2 = 0.4721$  for all data; residual  $R_I = 0.1581$  for 6363 observed data [ $I > 2\sigma(I)$ ], and goodness of fit (GOF) = 1.569.

##### *Specific refinement details:*

The crystals for empty cages **4** were obtained through the slow diffusion of dichloromethane vapor into the corresponding complexes solution ( $\text{CH}_3\text{CN}/\text{MeOH}$ , v/v 4/1) at room temperature over one month. Upon isolating the crystals from the mother liquid, they will be rapidly weathered. To counteract this, we sealed the crystal in a capillary tube filled with the mother liquid before testing. During the data collection process, the crystals exhibited very weak diffraction ability. The highest resolution of the crystal can only reach about 1.5 Å (Fig. S6), whether utilizing the Bruker D8 VENTURE photon II diffractometer with I $\mu$ s 3.0 microfocus X-ray source or the Shanghai Synchrotron Radiation Facility (SSRF). Fortunately, even at this low resolution, the built-in SHELXTL automatic parsing program in APEX III<sup>S56</sup> can generate a rough structure. On this basis, we further refined the data to derive the resulting structure. The asymmetric unit was found to comprise one complete and two incomplete (one-third)  $C_1$ -**2** molecules.



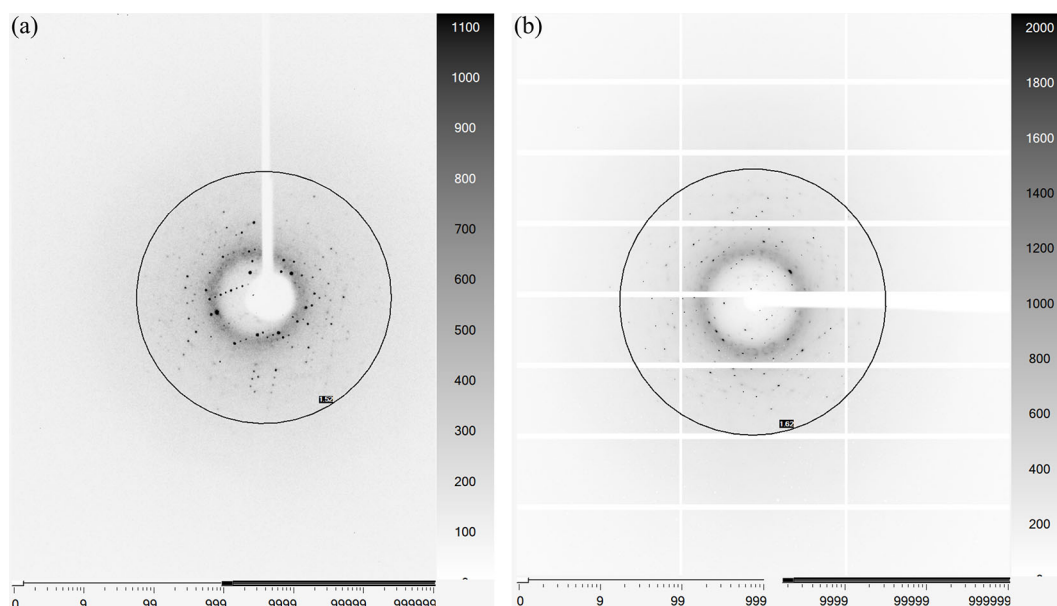

*Fig. S6.* Representative diffraction frames of crystals for **4** on Bruker D8 VENTURE photon II diffractometer (a) and SSRF (b).

The crystallographic analysis of **4** reveals a notable degree of disorder. Among the three triazole-pyridine-amide (TPA) chelating groups on ligand  $C_1$ -**2**, two can adopt two positions. Consequently, the pseudo-cube accommodates two metal centers with unambiguous stereoconfigurations ( $\Delta$  and  $\Lambda$ ), while the remaining two can be modeled as disordered with both  $\Delta$  and  $\Lambda$  stereoconfigurations. As a result, three possible stereoisomers ( $\Delta\Delta\Delta\Lambda$ ,  $\Delta\Lambda\Lambda\Lambda$ , and  $\Delta\Delta\Lambda\Lambda$ ) coexist in the crystal structure. The inherent weak diffraction ability of crystal for **4** might be attributed to the presence of these isomers, a phenomenon similar to a recent report from the Nitschke group.<sup>S8</sup>

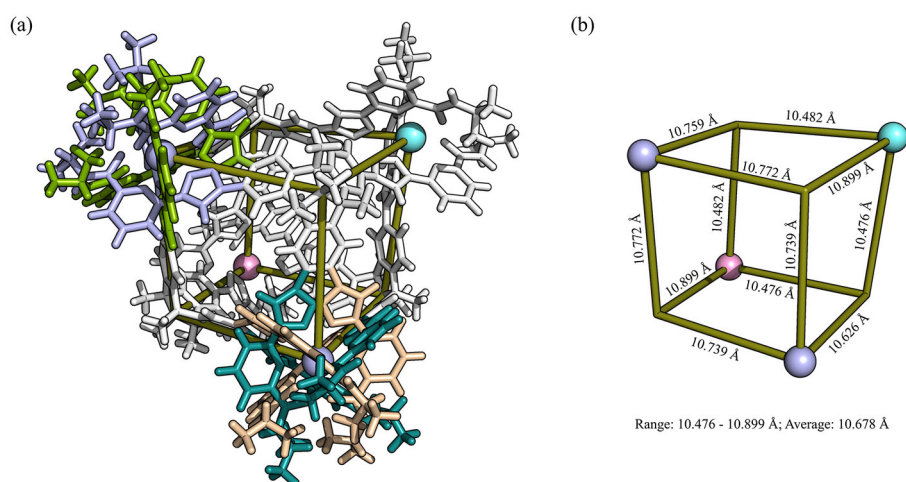

*Fig. S7.* (a) Cationic part of the crystal structure of **4** showing the arrangement of the disordered TPA chelating groups on two possible positions. (b) Simplified pseudo-cube from **4**. ( $\Delta$  handedness La centers, pale cyan sphere;  $\Lambda$  handedness La centers, pink sphere;  $\Delta/\Lambda$  handedness La centers, lightblue sphere)



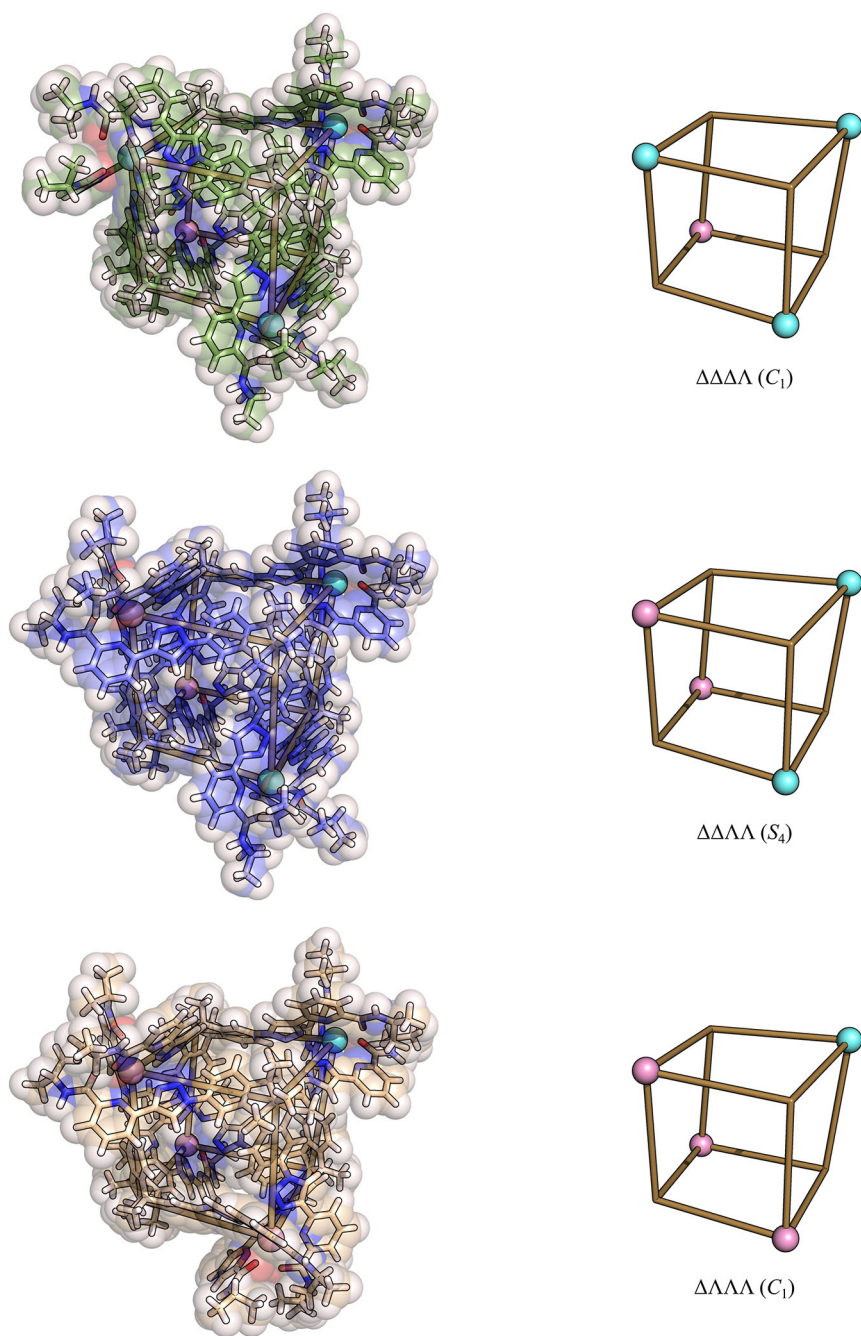

*Fig. S8.* Possible diastereomers present in the crystal structure of **4**. ( $\Delta$  handedness La centers, pale cyan sphere;  $\Lambda$  handedness La centers, pink sphere)

Owing to the limited resolution and the substantial thermal motion within the structure, we imposed constraints (SAME) on the bond lengths and angles of chemically identical TPA chelating groups to ensure their mutual similarity. Additionally, thermal parameter restrictions (SIMU, DELU, ISOR) were extended to all atoms, excluding lanthanum. Bond length and angle limitations (DFIX, DANG, SADI) were also administered to the peripheral isopropylamine groups and middle TBTQ skeletons. Furthermore, benzene and triazole components were modeled as rigid groups to enhance structural accuracy, employing the specific constraints (FLAT, AFIX

66, AFIX 56). Due to substantial disorder, segments of the TPA chelating groups exhibit proximity or spatial intersection. Therefore, given the connectivity, certain hydrogen atoms on the pyridine or peripheral isopropylamine groups cannot be added via the HFIX instruction.

Too low resolution is insufficient to support the determination of counterions or solvents. Because of the large number of amorphous solvents and highly-disordered counterions existing in the unit cell, which occupy as much as 75.1% of the unit cell ( $67780(18) \text{ \AA}^3$ ) for **4** based on PLATON/SOLV calculation, the final R factor was high. The residual electron intensities arising from these amorphous solvents and highly-disordered counterions were removed by the PLATON/SQUEEZE routine.<sup>S6, S7</sup>

CheckCIF gives four A-level alerts, all of which result from the crystal's inherent weak diffraction ability, the substantial thermal motion or disorder of counterions, and the presence of various isomers.

## 2.5 Crystal data for $C_{60} \subset S_4$ -**4**:

Monoclinic space group  $C2/c$ ,  $a = 39.925(8) \text{ \AA}$ ,  $b = 41.557(8) \text{ \AA}$ ,  $c = 41.117(8) \text{ \AA}$ ,  $\alpha = 90^\circ$ ,  $\beta = 95.23(3)^\circ$ ,  $\gamma = 90^\circ$ ,  $V = 67935(24) \text{ \AA}^3$ ,  $Z = 8$ ,  $T = 293(2) \text{ K}$ . Anisotropic least-squares refinement for the framework atoms and isotropic refinement for the other atoms on 47013 independent merged reflections ( $R_{int} = 0.0624$ ) converged at residual  $wR_2 = 0.3921$  for all data; residual  $R_1 = 0.1210$  for 28575 observed data [ $I > 2\sigma(I)$ ], and goodness of fit (GOF) = 1.353.

### *Specific refinement details:*

After standing for more than two weeks, purple flaky crystals for  $C_{60} \subset S_4$ -**4** appeared near the liquid level on the inner wall of the NMR tube. Upon retrieval from the mother liquid, the crystal is expeditiously coated with crystal oil, followed by quickly acquiring data within a nitrogen-purged environment. The utmost attainable resolution of the diffraction data is  $1.0 \text{ \AA}$  when the signal-to-noise ratio exceeds 2.1. The asymmetric unit was found to comprise one complete  $S_4$ -**4** cage, one  $C_{60}$  molecule, and eight associated counterions.

The  $C_{60}$  guest exhibits very high levels of disorder. In order to establish a reasonable model for  $C_{60}$ , we employed the disordered structure refinement (DSR) program,<sup>S9</sup> utilizing a full set of bond distance and angle restraints (SADI, FLAT, RIGU, SIMU, SAME, FLAT) to achieve semi-automatic modeling. The  $C_{60}$  molecular fragment in the database of DSR was used to fit the desired position in the unit cell.

Due to the significant thermal motion of counteranions, we introduced constraints (SAME) on the bond lengths and angles of chemically identical counteranions to ensure their mutual similarity. Thermal parameter limitations (SIMU, DELU) were also applied to all atoms except for lanthanum. Furthermore, we employed bond length and angle restraints (DFIX, SADI) to the peripheral isopropylamine groups and middle TBTQ skeletons for reasonable structure. The pyridine and triazole components were

treated as rigid groups to enhance structural accuracy, utilizing specific constraints (AFIX 66, AFIX 56).

Because of the large number of amorphous solvents and highly-disordered counterions existing in the unit cell, which occupy as much as 36.0% of the unit cell for  $C_{60}\subset S_4-4$  based on PLATON/SOLV calculation, the final R factor was slightly high. The residual electron intensities arising from these amorphous solvents and highly-disordered counterions were removed by the PLATON/SQUEEZE routine.<sup>S6, S7</sup>

CheckCIF gives four B-level alerts, all of which result from the thermal motion through the structure, disordered guest/counterions/solvents molecules, and the limited resolution.

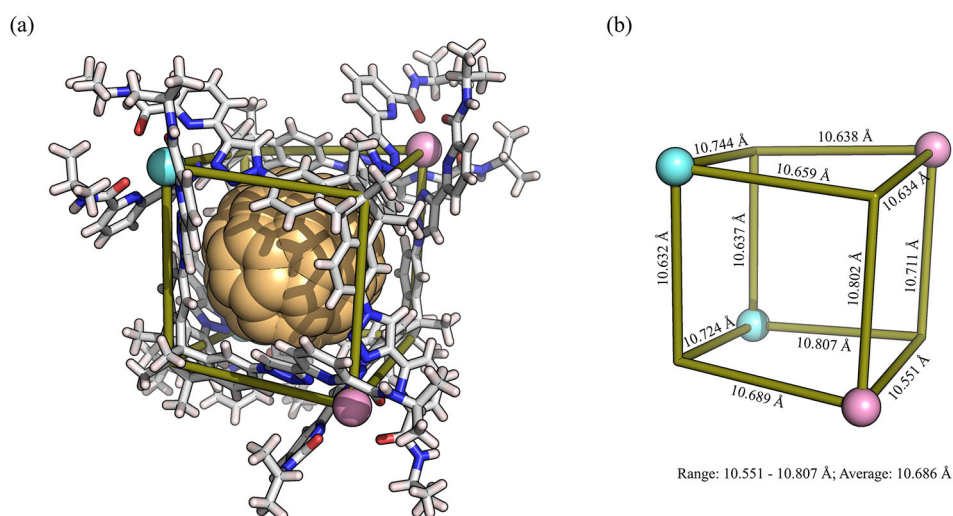

*Fig. S9.* (a) Cationic part of the crystal structure of  $C_{60}\subset S_4-4$  showing the guest bound within the cage cavity (one  $C_{60}$  molecule) in space-filling representation. (b) Simplified pseudo-cube from  $C_{60}\subset S_4-4$ . Counterions are omitted for clarity. (Δ handedness La centers, pale cyan sphere; Λ handedness La centers, pink sphere)

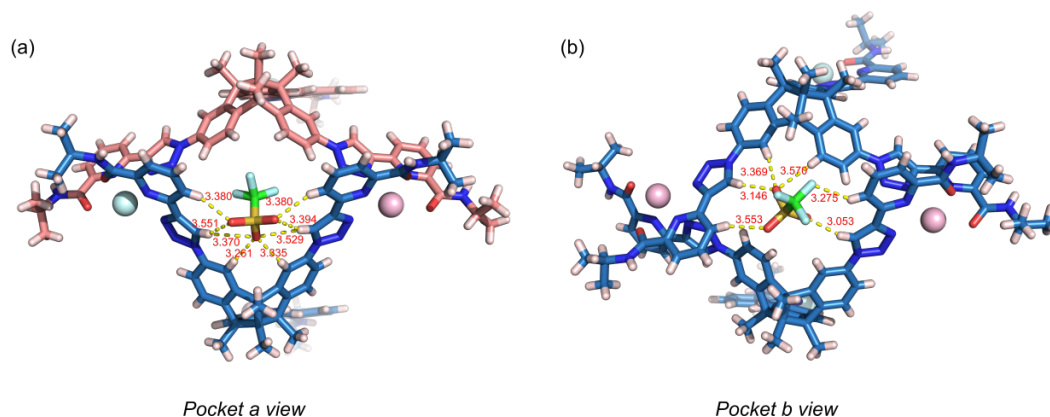

*Fig. S10.* Two types of pockets in  $C_{60}\subset S_4-4$  bind OTf<sup>-</sup> anions through multiple H-bond interactions. Pocket *a* consists of one *P-2* and one *M-2* (a), while pocket *b* consists of two *P-2* (b).

## 2.6 Crystal data for $C_{70}\subset S_4\text{-4}$ :

Monoclinic space group  $C2/c$ ,  $a = 40.408(8) \text{ \AA}$ ,  $b = 42.122(8) \text{ \AA}$ ,  $c = 41.136(8) \text{ \AA}$ ,  $\alpha = 90^\circ$ ,  $\beta = 96.44(3)^\circ$ ,  $\gamma = 90^\circ$ ,  $V = 69574(24) \text{ \AA}^3$ ,  $Z = 8$ ,  $T = 293(2) \text{ K}$ . Anisotropic least-squares refinement for the framework atoms and isotropic refinement for the other atoms on 47685 independent merged reflections ( $R_{int} = 0.041$ ) converged at residual  $wR_2 = 0.3877$  for all data; residual  $R_1 = 0.1437$  for 33359 observed data [ $I > 2\sigma(I)$ ], and goodness of fit (GOF) = 1.575.

### *Specific refinement details:*

After standing for more than two weeks, brown flaky crystals for  $C_{70}\subset S_4\text{-4}$  appeared near the liquid level on the inner wall of the NMR tube. After separating from the mother liquid, the crystal is promptly coated with crystal oil. Subsequently, data acquisition was carried out rapidly in an environment purged with liquid nitrogen. The highest achievable resolution for the diffraction data stands at  $1.0 \text{ \AA}$ , provided the signal-to-noise ratio surpasses 2.1. The asymmetric unit has been identified to consist of a complete  $S_4\text{-4}$  cage, one  $C_{70}$  guest molecule, and eleven corresponding counterions.

Similar to the  $C_{60}$  guest in  $C_{60}\subset S_4\text{-4}$ , the  $C_{70}$  guest exhibits a very high level of disorder in  $C_{70}\subset S_4\text{-4}$ . Therefore, the disordered structure refinement (DSR) program<sup>S9</sup> was utilized to establish a semi-automatic modeling equipped with a comprehensive range of bond distance and angle restraints (SADI, FLAT, RIGU, SIMU, SAME, and FLAT). We utilized the  $C_{70}$  molecular fragment from the DSR database to fit the desired position in the unit cell.

Due to the significant thermal motion exhibited by the counteranions, we introduced constraints (SAME) on the bond lengths and angles for chemically identical counteranions to ensure their congruence. Thermal parameter limitations (SIMU, DELU) were also applied to all atoms, except for lanthanum. Moreover, we implemented restrictions (DFIX, SADI) on bond lengths and angles for the peripheral isopropylamine groups and middle TBTQ skeletons. To heighten the precision of our structure, the pyridine and triazole components were treated as rigid groups, employing specific constraints (AFIX 66, AFIX 56).

Owing to the presence of numerous solvents and disordered counterions within the unit cell, constituting a considerable 37.8% portion for  $C_{70}\subset S_4\text{-4}$  according to PLATON/SOLV calculation, a slightly elevated final R factor was observed. The residual electron intensities originating from these amorphous solvents and disordered counterions were successfully eliminated by utilizing of the PLATON/SQUEEZE routine.<sup>S6,S7</sup>

CheckCIF gives one A-level alert and four B-level alerts, all of which result from the thermal motion through the structure, disordered guest/counterions/solvents molecules, and the limited resolution.

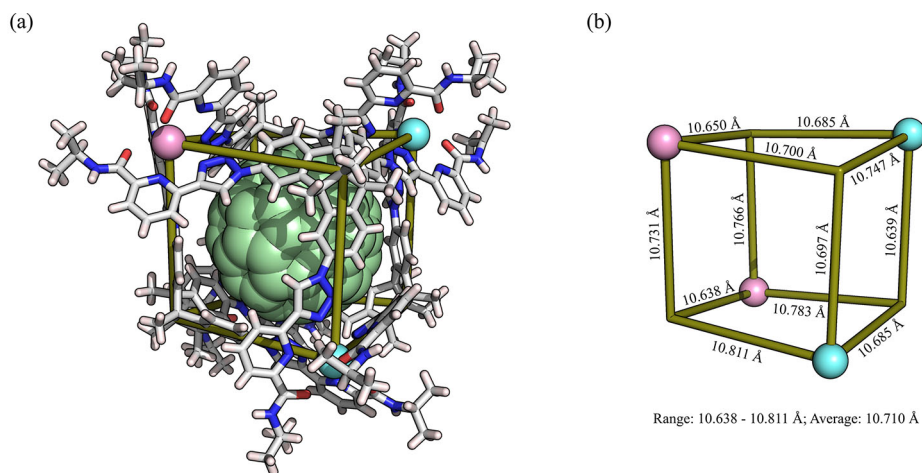

*Fig. S11.* (a) Cationic part of the crystal structure of  $C_{70}C_4-4$  showing the guest bound within the cage cavity (one  $C_{70}$  molecule) in space-filling representation. (b) Simplified pseudo-cube from  $C_{70}C_4-4$ . Solvents and counterions are omitted for clarity. ( $\Delta$  handedness La centers, pale cyan sphere;  $\Lambda$  handedness La centers, pink sphere)

### 3. Synthesis and Characterization

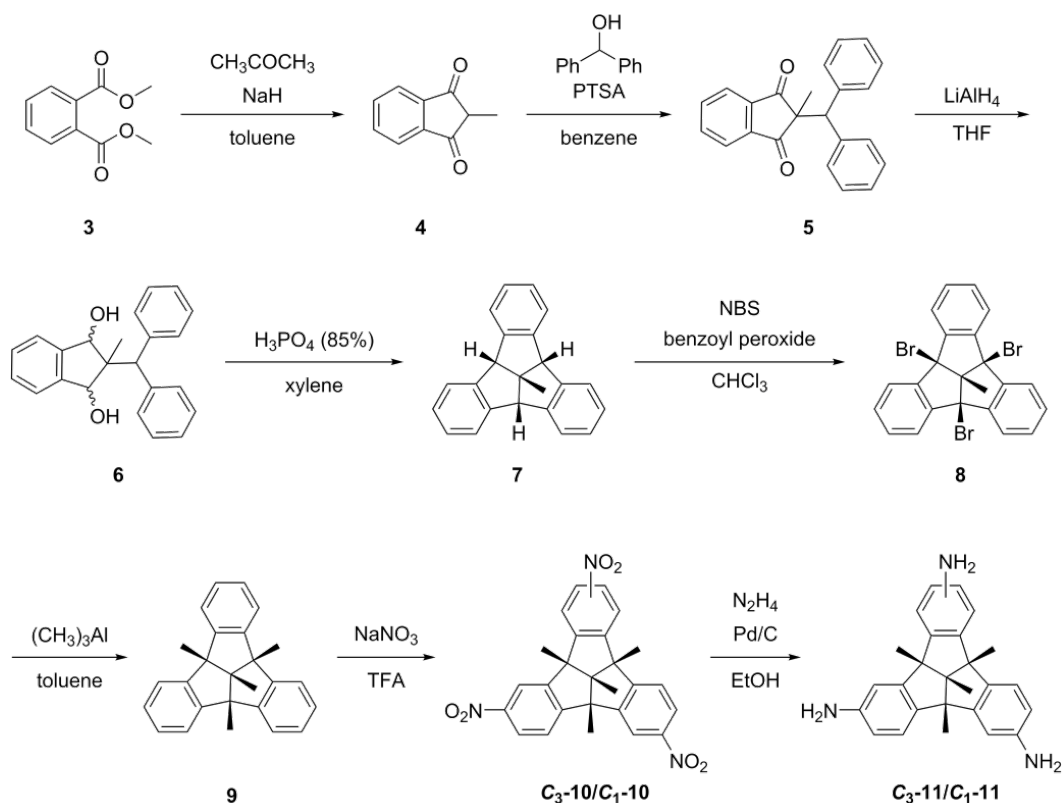

*Scheme S1.* Synthetic route of precursors  $C_3-11/C_1-11$ .

### 3.1 Synthesis of ligands

#### 3.1.1 Synthesis of ligand C<sub>3</sub>-1

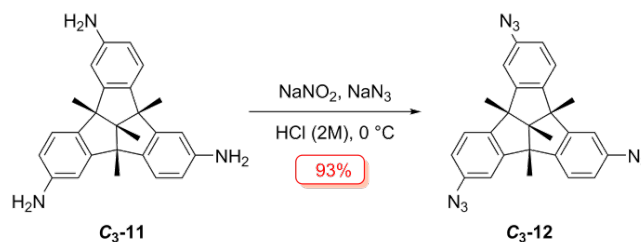

The precursor C<sub>3</sub>-11 was synthesized based on reported methods.<sup>S10-S12</sup> Aqueous sodium nitrite (174 mg, 2.52 mmol, for a 3/1 ratio of nitrite to amino group) was added to a cooled solution of C<sub>3</sub>-11 (105 mg, 0.28 mmol, 1.0 equiv) in dilute hydrochloric acid (2 M, 15 mL) to create the diazonium salt in an ice bath. After stirring for 0.5 h, an aqueous solution of sodium azide (182 mg, 2.80 mmol, 10.0 equiv) was added dropwise to the diazonium salt. The mixture was stirred for another 2 h. The precipitate was recovered by filtration and further purified by column chromatography on silica gel with petroleum ether. Off-white powder C<sub>3</sub>-12 was obtained after drying *in vacuo* (120 mg, 93%).

<sup>1</sup>H NMR (400 MHz, CDCl<sub>3</sub>, 298 K)  $\delta$  = 7.30 (d,  $J$  = 8.2 Hz, 3H), 6.92 (d,  $J$  = 2.1 Hz, 3H), 6.88 (dd,  $J$  = 8.2, 2.1 Hz, 3H), 1.61 (s, 9H), 1.34 (s, 3H). <sup>13</sup>C NMR (101 MHz, CDCl<sub>3</sub>, 298 K)  $\delta$  = 150.47, 144.57, 137.40, 125.53, 119.70, 113.66, 69.68, 62.94, 25.00, 15.52. ESI-TOF-MS for C<sub>26</sub>H<sub>21</sub>N<sub>9</sub> [M + Na]<sup>+</sup>: calcd,  $m/z$  = 482.1812; found: 482.1803.

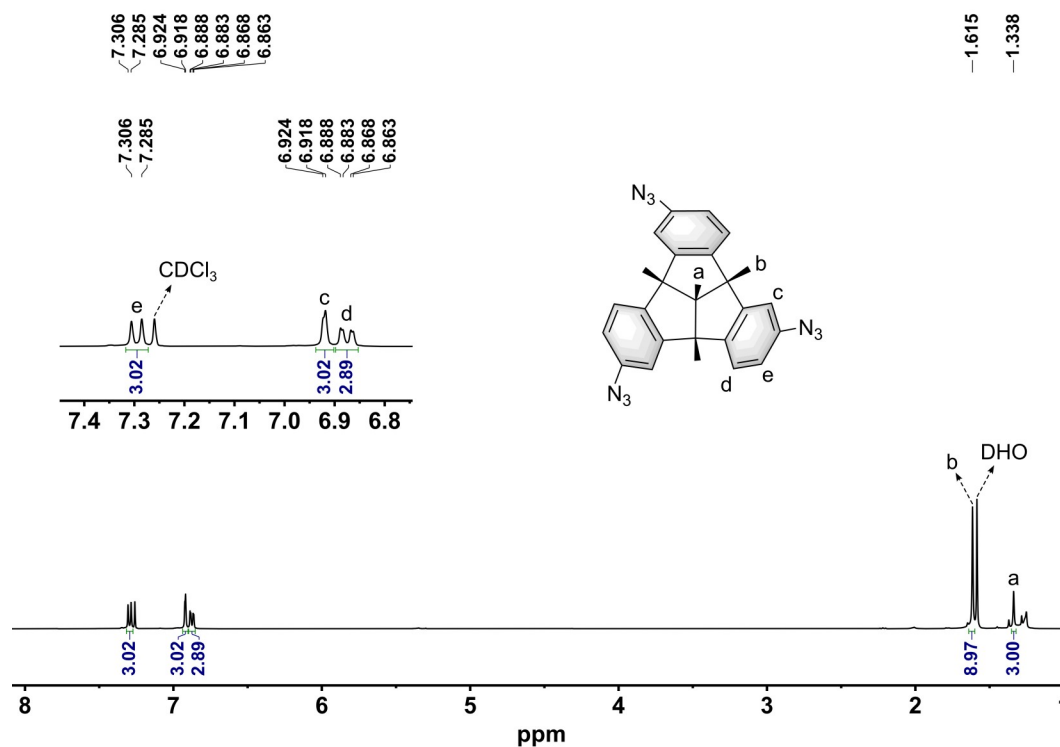

Fig. S12. <sup>1</sup>H NMR spectrum of C<sub>3</sub>-12 (400 MHz, 298 K, CDCl<sub>3</sub>).

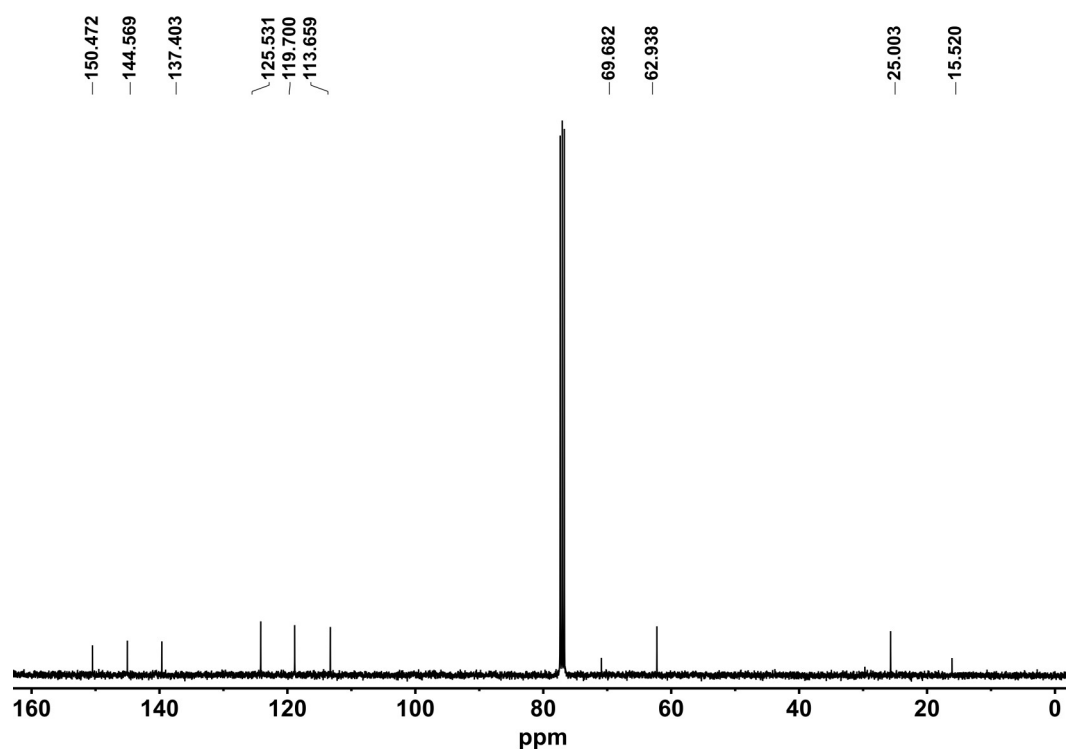

Fig. S13.  $^{13}\text{C}$  NMR spectrum of  $\text{C}_3\text{-12}$  (101 MHz, 298 K,  $\text{CDCl}_3$ ).

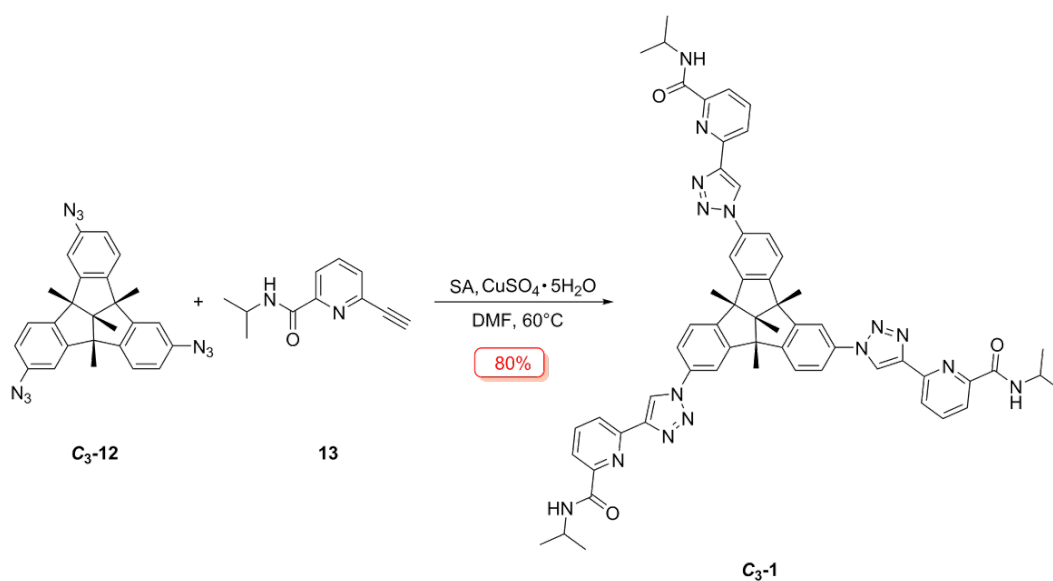

The precursor **13** was synthesized based on reported methods.<sup>S13</sup>  $\text{C}_3\text{-12}$  (120 mg, 0.26 mmol, 1.0 equiv), **13** (162 mg, 0.86 mmol, 3.3 equiv), sodium ascorbate (SA, 109 mg, 0.55 mmol, 2.1 equiv) and  $\text{CuSO}_4 \cdot 5\text{H}_2\text{O}$  (58 mg, 0.23 mmol, 0.9 equiv) were added into a solution of DMF (40 mL). The reaction mixture was stirred at 60 °C for 48 h. After that, the reaction solution was cooled to room temperature, and the solvent was removed under reduced pressure. Then, 50 mL of EDTA saturated aqueous solution was added and stirred for 1 h. The solution was extracted with mixed organic solvents (50 mL  $\times$  3, DCM/MeOH v/v = 10/1), and the organic phase was washed with distilled



water (30 mL  $\times$  2) and dried with anhydrous  $\text{Na}_2\text{SO}_4$ . The solvents were removed under reduced pressure to afford a crude product which was further purified chromatographically ( $\text{SiO}_2$ ,  $\text{DCM}/\text{MeOH}$ , v/v = 100/1). White powder **C<sub>3</sub>-1** was obtained after drying *in vacuo* (213 mg, 80%). The racemic **C<sub>3</sub>-1** can be further separated into *P*-1 and *C*-1 by chiral HPLC (See section 8 for details of the enantioseparation).

$^1\text{H}$  NMR (400 MHz,  $\text{CDCl}_3$ , 298 K)  $\delta$  = 8.47 (s, 3H), 8.36 (d,  $J$  = 7.9 Hz, 3H), 8.20 (d,  $J$  = 7.7 Hz, 3H), 8.02 – 7.94 (m, 6H), 7.77 (d,  $J$  = 8.2 Hz, 3H), 7.66 (d,  $J$  = 8.3 Hz, 3H), 7.56 (d,  $J$  = 8.3 Hz, 3H), 4.36 – 4.26 (m, 3H), 1.85 (s, 9H), 1.53 (s, 3H), 1.30 (t,  $J$  = 6.7 Hz, 18H).  $^{13}\text{C}$  NMR (101 MHz,  $\text{CDCl}_3$ , 298 K)  $\delta$  = 163.17, 150.37, 150.17, 149.15, 148.50, 148.36, 138.54, 137.15, 124.51, 121.95, 120.69, 120.35, 116.25, 100.00, 71.17, 62.90, 59.60, 41.57, 38.22, 31.31, 29.79, 25.87, 22.92. ESI-TOF-MS for  $\text{C}_{59}\text{H}_{57}\text{N}_{15}\text{O}_3$   $[\text{M} + \text{Na}]^+$ : calcd,  $m/z$  = 1046.4661; found, 1046.4655.

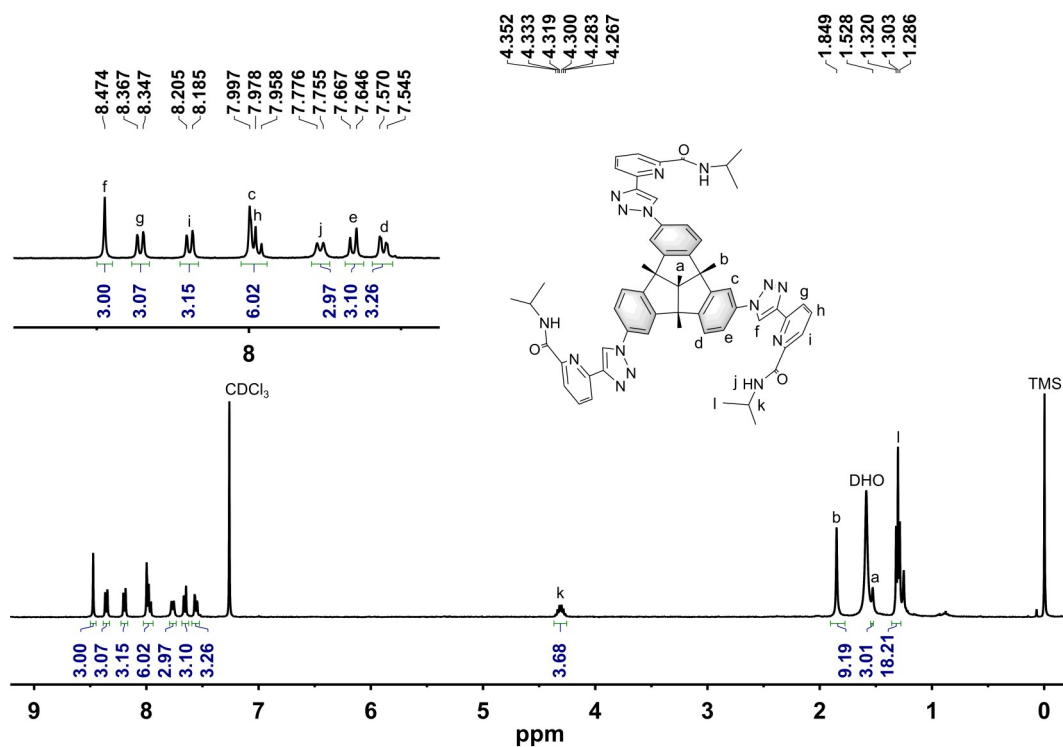

Fig. S14.  $^1\text{H}$  NMR spectrum of **C<sub>3</sub>-1** (400 MHz, 298 K,  $\text{CDCl}_3$ ).



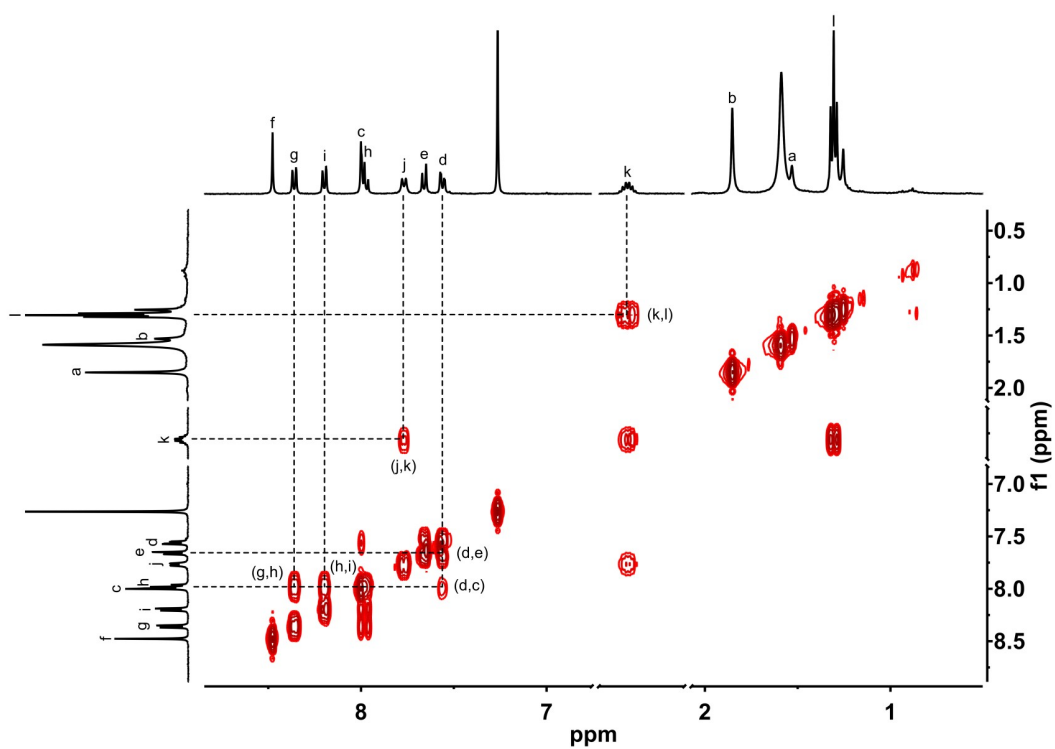

Fig. S15. Partial  $^1\text{H}$ - $^1\text{H}$  COSY spectrum of  $\text{C}_3$ -1 (400 MHz, 298 K,  $\text{CDCl}_3$ ).

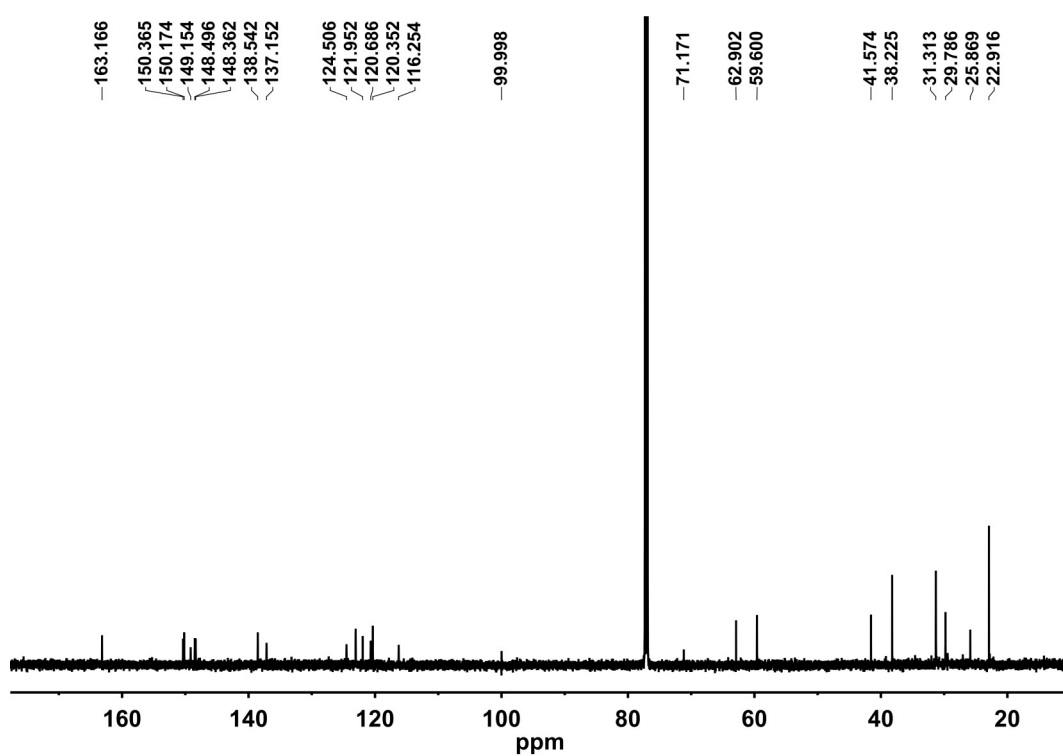

Fig. S16.  $^{13}\text{C}$  NMR spectrum of  $\text{C}_3$ -1 (101 MHz, 298 K,  $\text{CDCl}_3$ ).

### 3.1.2 Synthesis of ligand C<sub>1</sub>-2

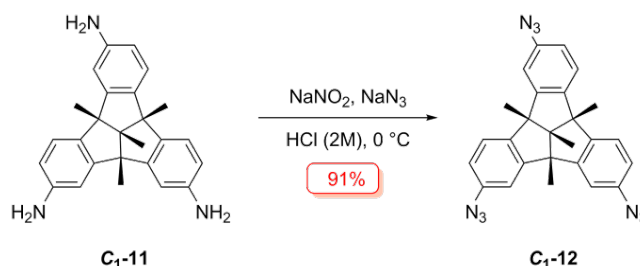

Similar to C<sub>3</sub>-symmetric **11**, the C<sub>1</sub>-symmetric precursor **11** as a by-product was synthesized based on reported methods.<sup>S10-S12</sup> Aqueous sodium nitrite (652 mg, 9.45 mmol, for a 3/1 ratio of nitrite to amino group) was added to a cooled solution of C<sub>1</sub>-11 (400 mg, 1.05 mmol, 1.0 equiv) in dilute hydrochloric acid (2 M, 30 mL) to create the diazonium salt in an ice bath. After stirring for 0.5 h, an aqueous solution of sodium azide (683 mg, 10.50 mmol, 10.0 equiv) was added dropwise to the diazonium salt. The mixture was stirred for another 2 h. The precipitate was recovered by filtration and further purified by column chromatography on silica gel with petroleum ether. Off-white powder C<sub>1</sub>-12 was obtained after drying *in vacuo* (439 mg, 91%).

<sup>1</sup>H NMR (400 MHz, CDCl<sub>3</sub>, 298 K)  $\delta$  = 7.32 – 7.27 (m, 3H), 6.95 – 6.82 (m, 6H), 1.61 (s, 9H), 1.34 (s, 3H). <sup>13</sup>C NMR (101 MHz, CDCl<sub>3</sub>, 298 K)  $\delta$  = 150.30, 150.08, 149.91, 145.58, 145.43, 145.18, 140.39, 139.56, 139.48, 70.92, 62.55, 62.23, 61.91, 31.52, 29.72, 25.77, 25.70, 25.63, 16.10. ESI-TOF-MS for C<sub>26</sub>H<sub>21</sub>N<sub>9</sub> [M + Na]<sup>+</sup>: calcd, m/z = 482.1812; found: 482.1815.

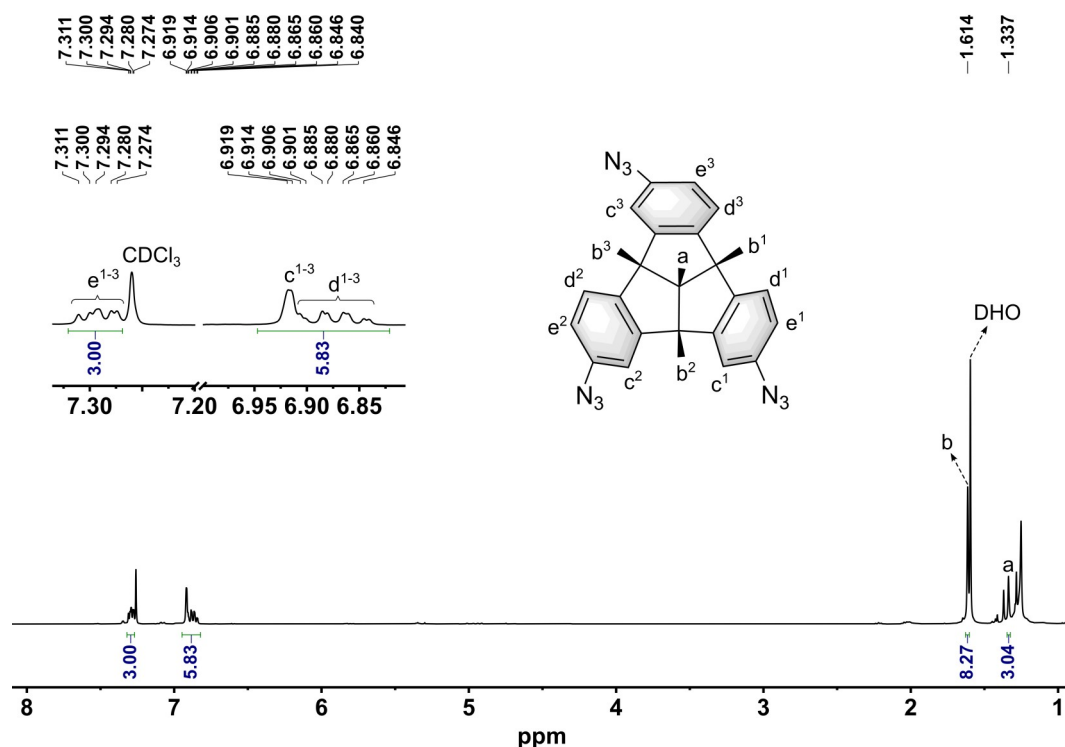

Fig. S17. <sup>1</sup>H NMR spectrum of C<sub>1</sub>-12 (400 MHz, 298 K, CDCl<sub>3</sub>).

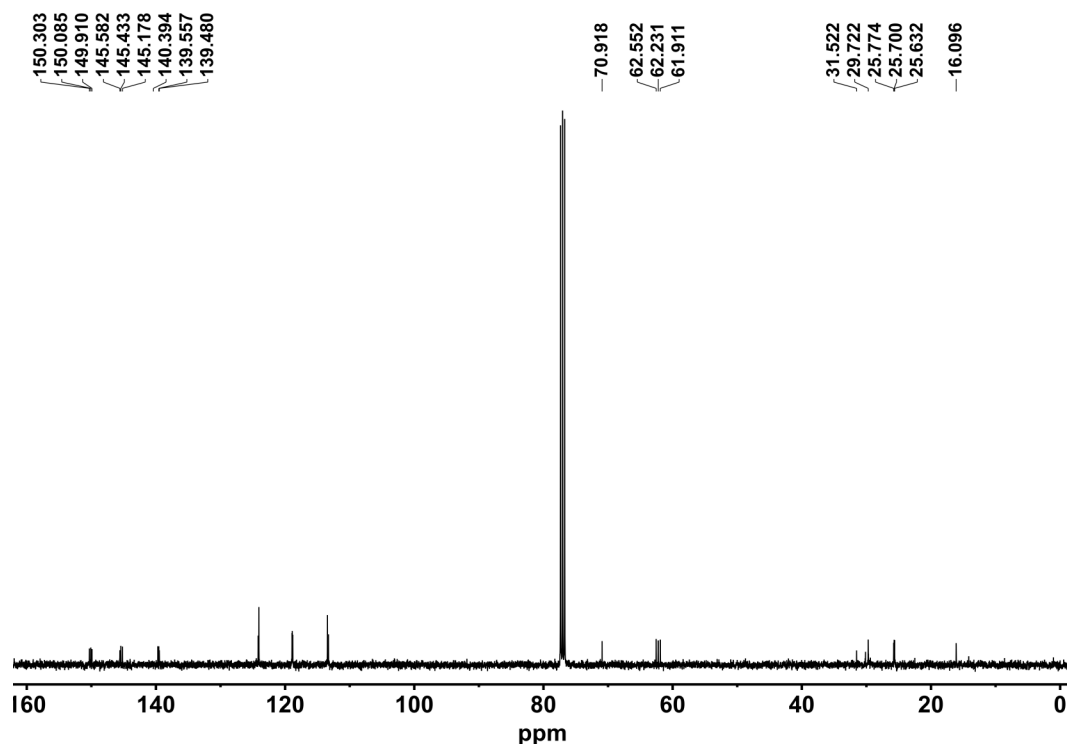

Fig. S18.  $^{13}\text{C}$  NMR spectrum of  $\text{C}_1\text{-12}$  (101 MHz, 298 K,  $\text{CDCl}_3$ ).

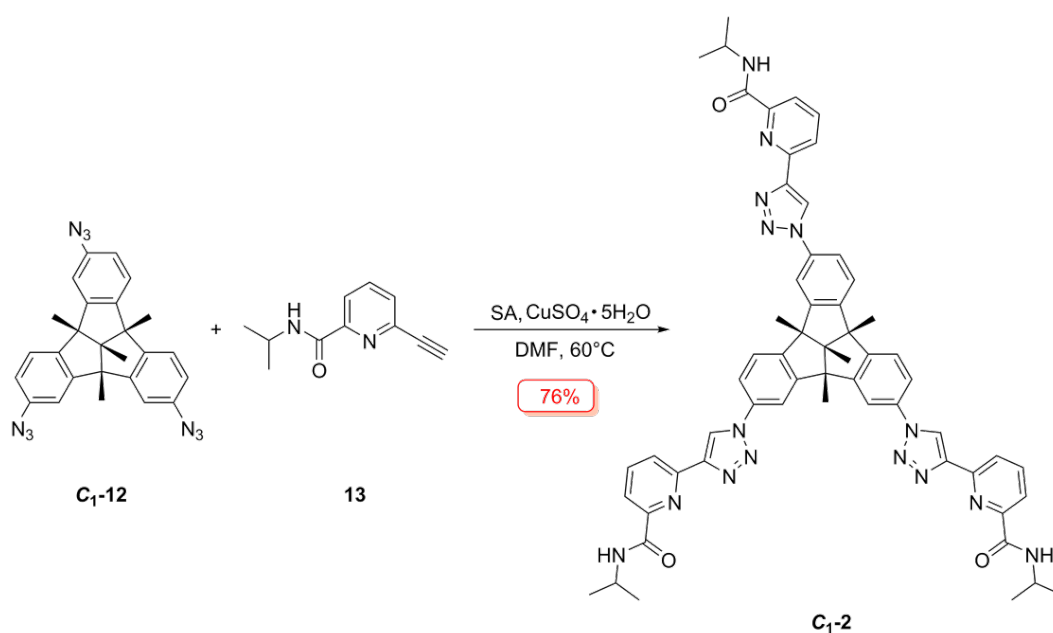

$\text{C}_1\text{-12}$  (300 mg, 0.65 mmol, 1.0 equiv), **13** (405 mg, 2.15 mmol, 3.3 equiv), sodium ascorbate (SA, 271 mg, 1.37 mmol, 2.1 equiv) and  $\text{CuSO}_4 \cdot 5\text{H}_2\text{O}$  (148 mg, 0.59 mmol, 0.9 equiv) were added into a solution of DMF (60 mL). The reaction mixture was stirred at 60 °C for 48 h. After that, the reaction solution was cooled to room temperature, and the solvent was removed under reduced pressure. Then, 50 mL of EDTA saturated aqueous solution was added and stirred for 1 h. The solution was extracted with mixed

organic solvents (50 mL  $\times$  3, DCM/MeOH v/v = 10/1), and the organic phase was washed with distilled water (30 mL  $\times$  2) and dried with anhydrous Na<sub>2</sub>SO<sub>4</sub>. The solvents were removed under reduced pressure to afford a crude product which was further purified chromatographically (SiO<sub>2</sub>, DCM/MeOH, v/v = 100/1). White powder C<sub>1</sub>-**2** was obtained after drying *in vacuo* (506 mg, 76%). Repeated attempts to separate the enantiomers *P/M*-**2** ended in failure, which may be attributed to the smaller structural difference of C<sub>1</sub>-symmetric *P/M*-**2** relative to C<sub>3</sub>-symmetric *P/M*-**1**.

<sup>1</sup>H NMR (400 MHz, CDCl<sub>3</sub>, 298 K)  $\delta$  = 8.55 – 8.46 (m, 3H), 8.39 – 8.27 (m, 3H), 8.23 – 8.12 (m, 3H), 8.02 – 7.87 (m, 6H), 7.79 (t, *J* = 7.2 Hz, 3H), 7.69 – 7.54 (m, 6H), 4.37 – 4.23 (m, 3H), 1.95 – 1.74 (m, 9H), 1.52 (s, 3H), 1.35 – 1.22 (m, 18H). <sup>13</sup>C NMR (101 MHz, CDCl<sub>3</sub>, 298 K)  $\delta$  = 163.12, 163.09, 159.11, 150.29, 150.06, 150.01, 149.98, 149.33, 149.27, 149.19, 148.45, 148.44, 148.24, 148.19, 138.48, 138.41, 137.19, 137.05, 124.50, 124.31, 124.29, 123.05, 123.00, 122.96, 121.88, 121.81, 121.39, 121.29, 120.75, 120.51, 120.47, 120.30, 116.22, 116.18, 71.19, 63.13, 62.78, 62.56, 41.49, 26.93, 26.07, 25.83, 25.77, 22.87, 22.82, 16.20, 0.02. ESI-TOF-MS for C<sub>59</sub>H<sub>57</sub>N<sub>15</sub>O<sub>3</sub> [M + Na]<sup>+</sup>: calcd, *m/z* = 1046.4661; found, 1046.4666.

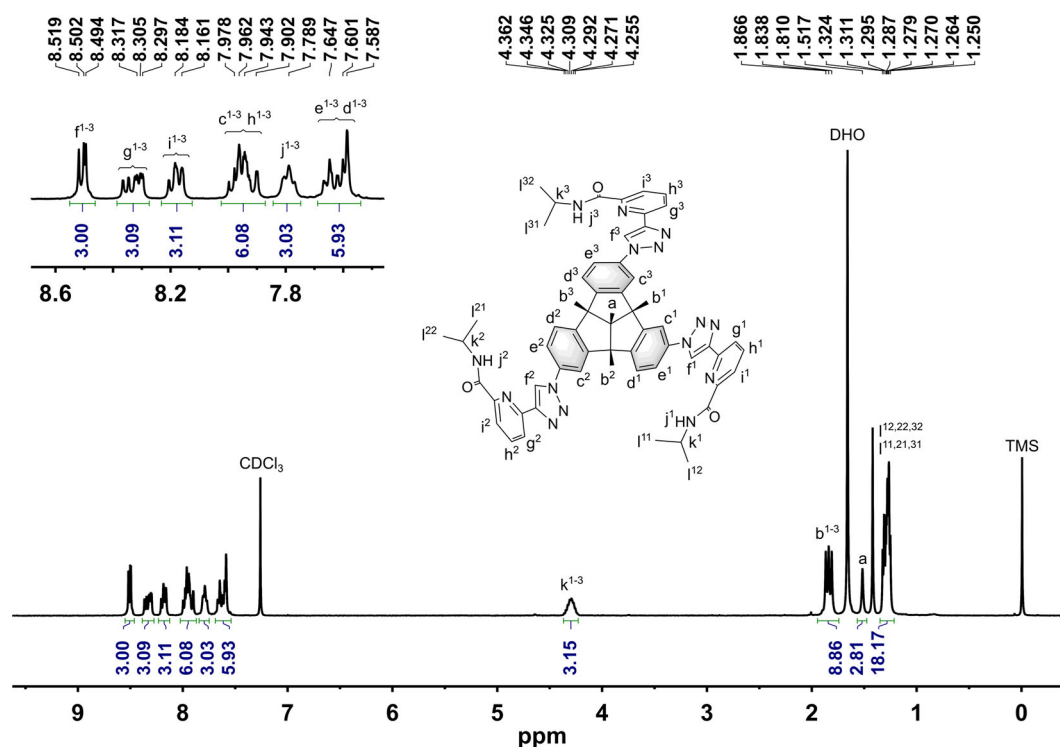

Fig. S19. <sup>1</sup>H NMR spectrum of C<sub>1</sub>-**2** (400 MHz, 298 K, CDCl<sub>3</sub>).

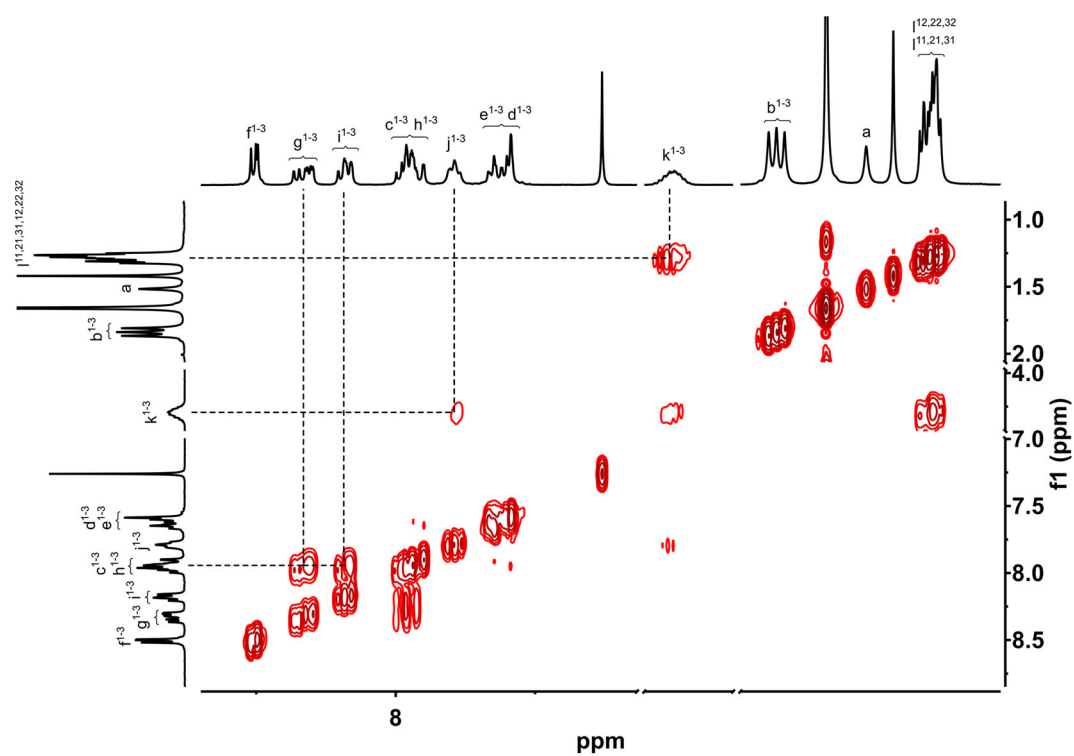

Fig. S20. Partial  $^1\text{H}$ - $^1\text{H}$  COSY spectrum of  $\text{C}_1$ -**2** (400 MHz, 298 K,  $\text{CDCl}_3$ ).

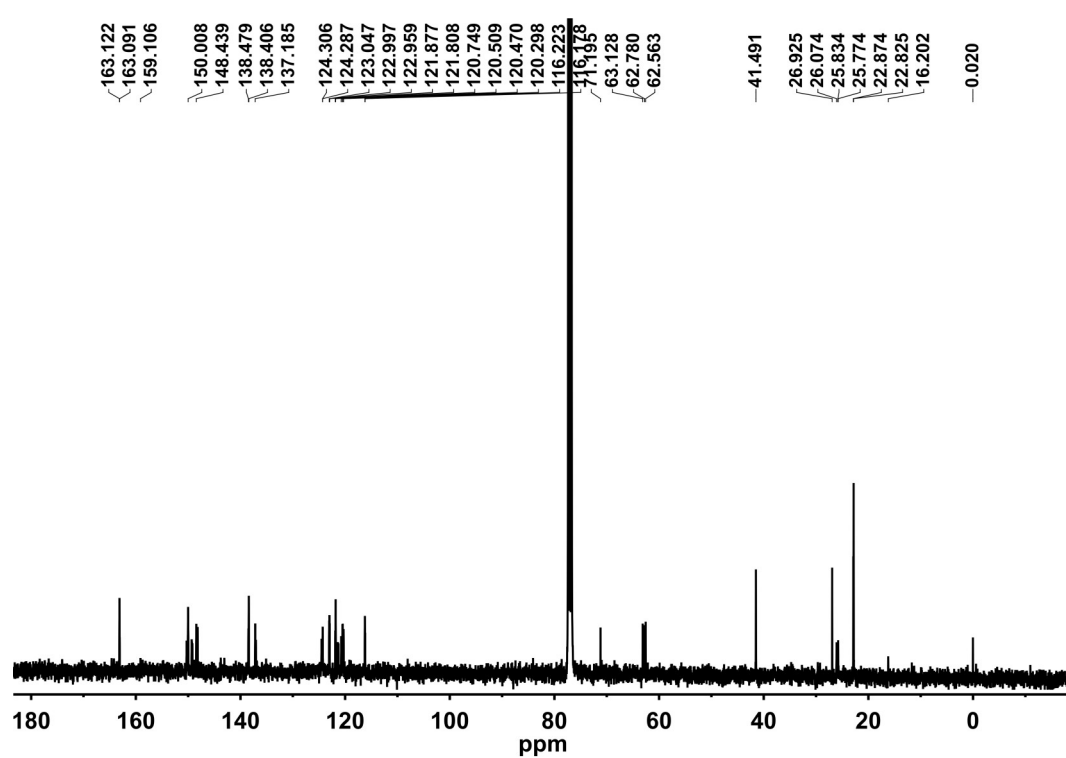

Fig. S21.  $^{13}\text{C}$  NMR spectrum of  $\text{C}_1$ -**2** (101 MHz, 298 K,  $\text{CDCl}_3$ ).

## 3.2 Synthesis of pseudo-cubic cages

### 3.2.1 Synthesis of cage *T*-3

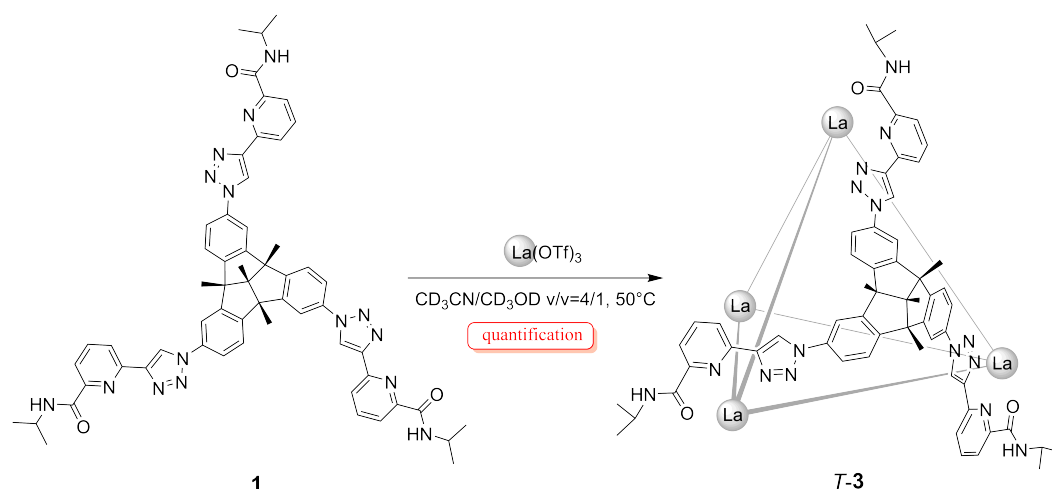

La(OTf)<sub>3</sub> (2.3 mg, 3.9 μmol) and **1** (4.0 mg, 3.9 μmol) were mixed in a solution of CD<sub>3</sub>CN/CD<sub>3</sub>OD (v/v 4/1, 500 μL). After stirring at 50 °C for 0.5 h, the white suspension gradually turned into a colorless solution that was characterized by NMR spectroscopy without further treatment. <sup>1</sup>H NMR spectrum showed that the assembly of **1** with La(OTf)<sub>3</sub> quantitatively formed *T*-symmetric cage **3**.

<sup>1</sup>H NMR (400 MHz, 298 K, CD<sub>3</sub>CN/CD<sub>3</sub>OD v/v 4/1): δ = 9.65 (s, 12H, *H*<sub>11</sub>), 8.59 (d, *J* = 8.1 Hz, 12H, *H*<sub>14</sub>), 8.40 (t, *J* = 8.0 Hz, 12H, *H*<sub>15</sub>), 8.09 (d, *J* = 7.9 Hz, 12H, *H*<sub>16</sub>), 7.80 (s, 12H, *H*<sub>10</sub>), 7.57 (d, *J* = 8.6 Hz, 12H, *H*<sub>7</sub>), 6.88 (d, *J* = 8.5 Hz, 12H, *H*<sub>8</sub>), 3.908 (m, 12H, *H*<sub>20</sub>), 1.63 (s, 36H, *H*<sub>4</sub>), 1.33 (s, 12H, *H*<sub>1</sub>), 1.14 (d, *J* = 6.7 Hz, 36H, *H*<sub>22</sub>), 0.86 (d, *J* = 6.6 Hz, 36H, *H*<sub>21</sub>). <sup>13</sup>C NMR (101 MHz, 298 K, CD<sub>3</sub>CN/CD<sub>3</sub>OD v/v 4/1) δ 168.41, 151.45, 150.78, 150.35, 149.90, 149.06, 143.48, 137.09, 125.98, 124.03, 121.88, 119.77, 112.49, 73.08, 63.44, 43.89, 25.66, 23.23, 21.99, 14.86. High-resolution ESI-TOF-MS for *T*-**3**. The following picked signals are those at the highest intensities. *m/z* Calcd for [*T*-**3** – 8(OTf)]<sup>8+</sup> 656.0430, found 656.0439; Calcd for [*T*-**3** – 7(OTf)]<sup>7+</sup> 771.0423, found 771.0432; Calcd for [*T*-**3** – 6(OTf)]<sup>6+</sup> 924.3748, found 924.3763; Calcd for [*T*-**3** – 5(OTf)]<sup>5+</sup> 1139.0402, found 1139.0421; Calcd for [*T*-**3** – 4(OTf)]<sup>4+</sup> 1461.0384, found 1461.0411.

*T*-**3** (*Δ*<sub>4</sub>-*P*<sub>4</sub> or *Δ*<sub>4</sub>-*M*<sub>4</sub>) was prepared by the same procedure except that racemic ligand **C**<sub>3</sub>-**1** was replaced by chiral *P*-**1** or *M*-**1** (Fig. S25).

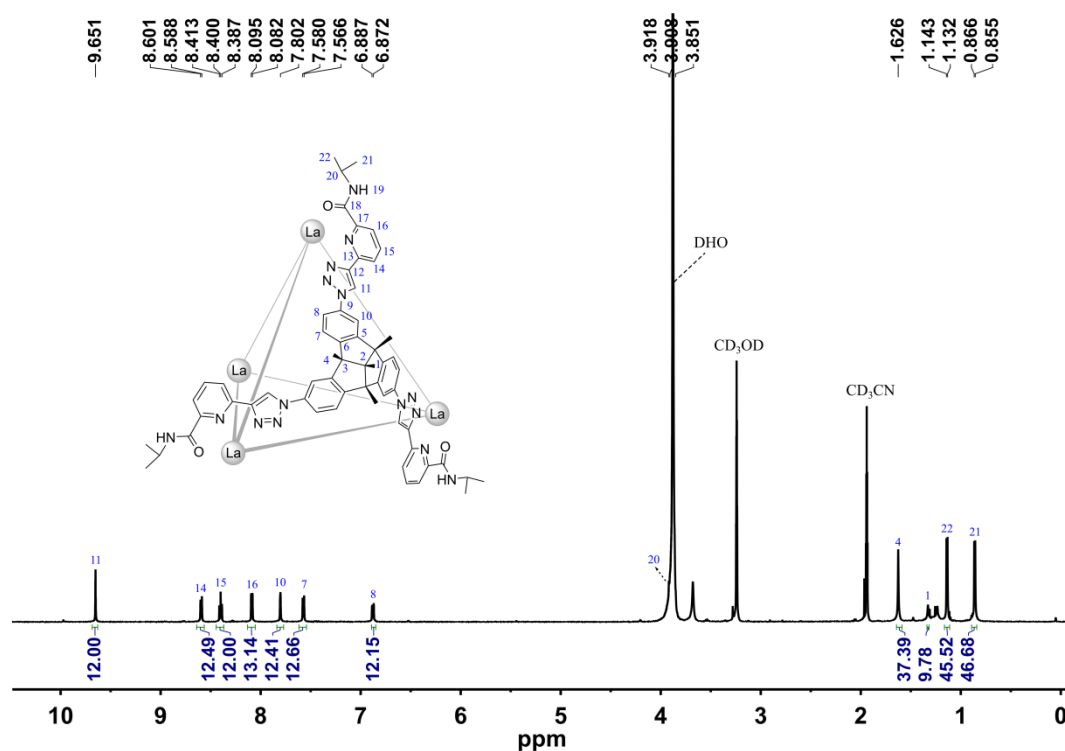

Fig. S22.  $^1\text{H}$  NMR spectrum of **T-3** (400 MHz, 298 K,  $\text{CD}_3\text{CN}/\text{CD}_3\text{OD}$  v/v 4/1,  $[\text{T-3}] = 2.0$  mM).

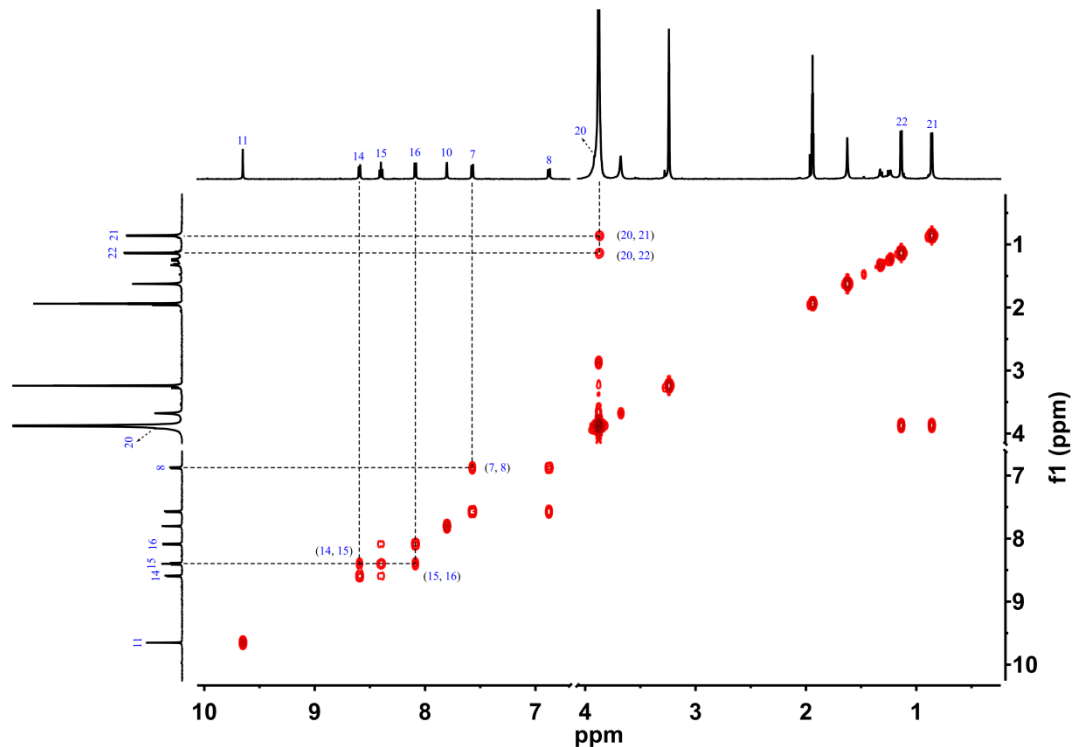

Fig. S23. Partial  $^1\text{H}$ - $^1\text{H}$  COSY spectrum of **T-3** (400 MHz, 298 K,  $\text{CD}_3\text{CN}/\text{CD}_3\text{OD}$  v/v 4/1,  $[\text{T-3}] = 2.0$  mM).

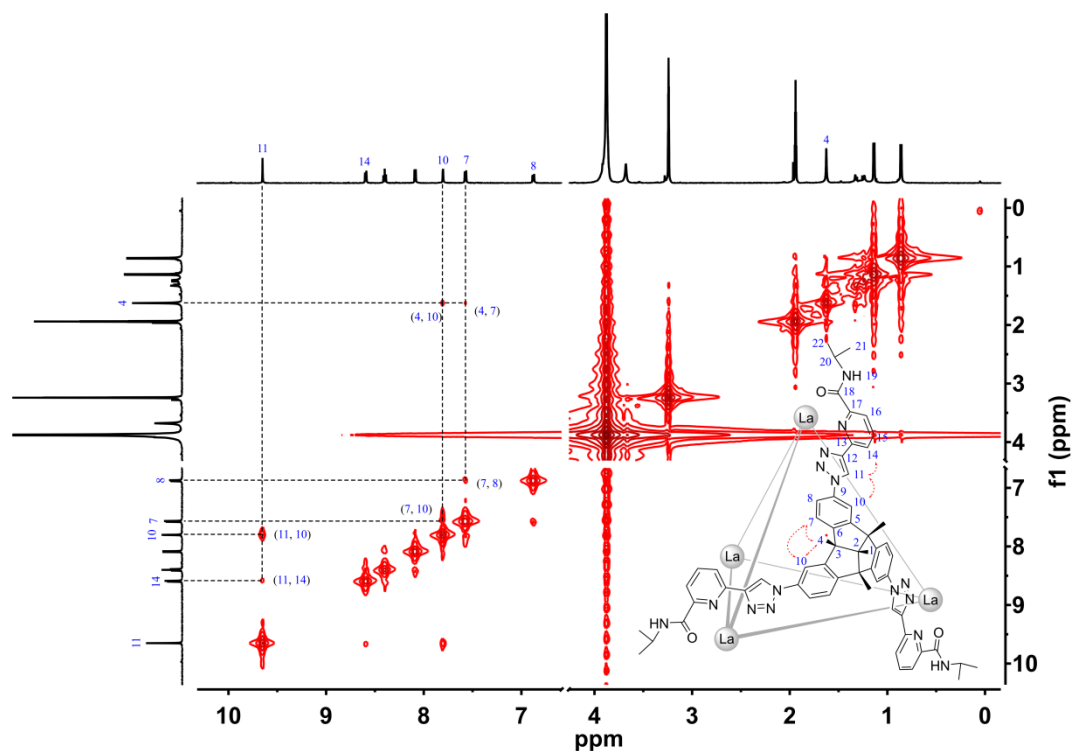

Fig. S24. Partial  $^1\text{H}$ - $^1\text{H}$  NOESY spectrum of *T-3* (400 MHz, 298 K,  $\text{CD}_3\text{CN}/\text{CD}_3\text{OD}$  v/v 4/1,  $[\text{T-3}] = 2.0$  mM).

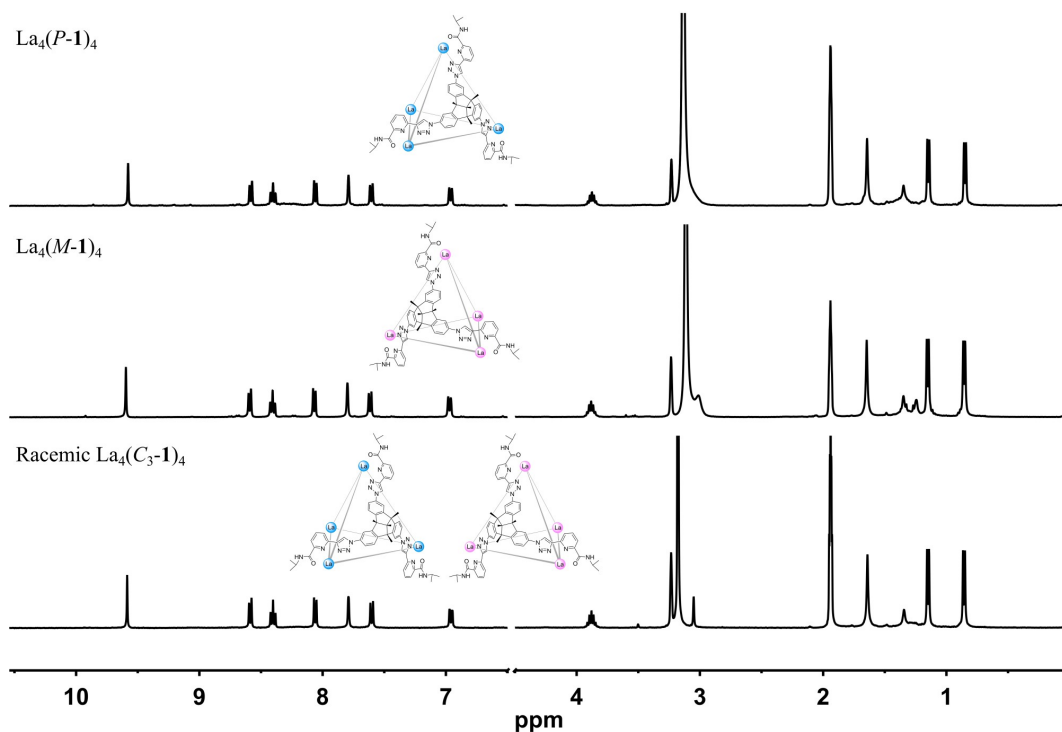

Fig. S25. Comparison of  $^1\text{H}$  NMR spectra of racemic  $\text{La}_4(\text{C}_3\text{-1})_4$ , homochiral  $\text{La}_4(\text{M-1})_4$  and  $\text{La}_4(\text{P-1})_4$  (400 MHz, 298 K,  $\text{CD}_3\text{CN}/\text{MeOD}$  v/v 4/1).



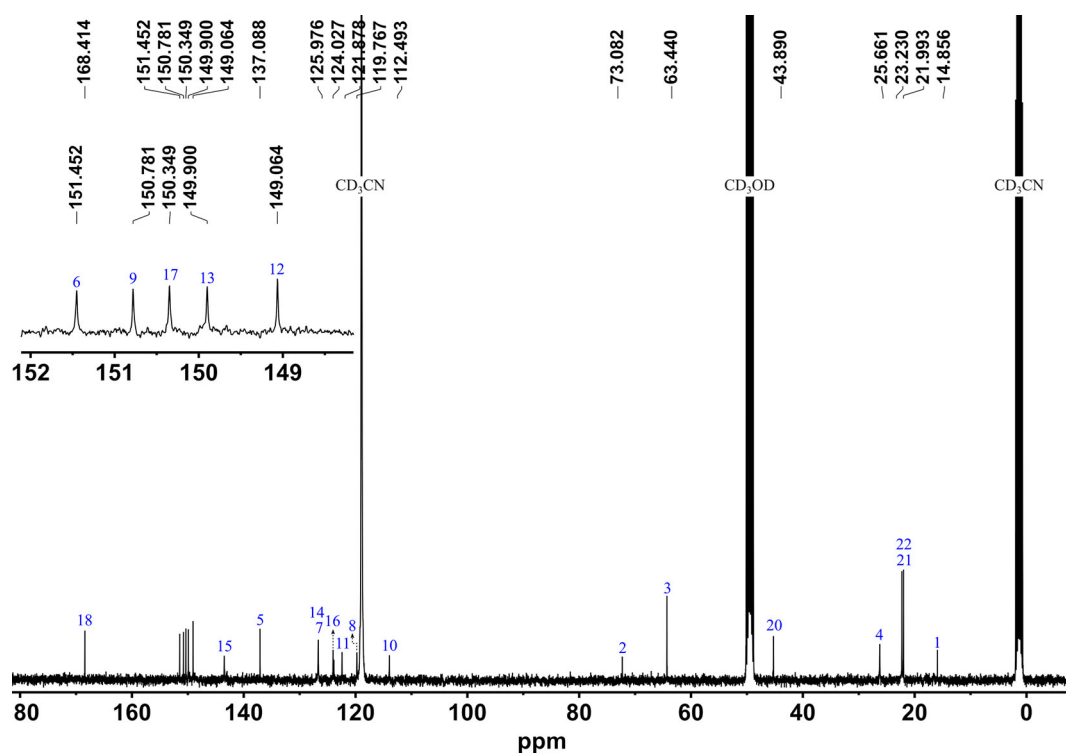

Fig. S26.  $^{13}\text{C}$  NMR spectrum of *T-3* (400 MHz, 298 K, CD<sub>3</sub>CN/CD<sub>3</sub>OD v/v 4/1, [*T-3*] = 2.0 mM).

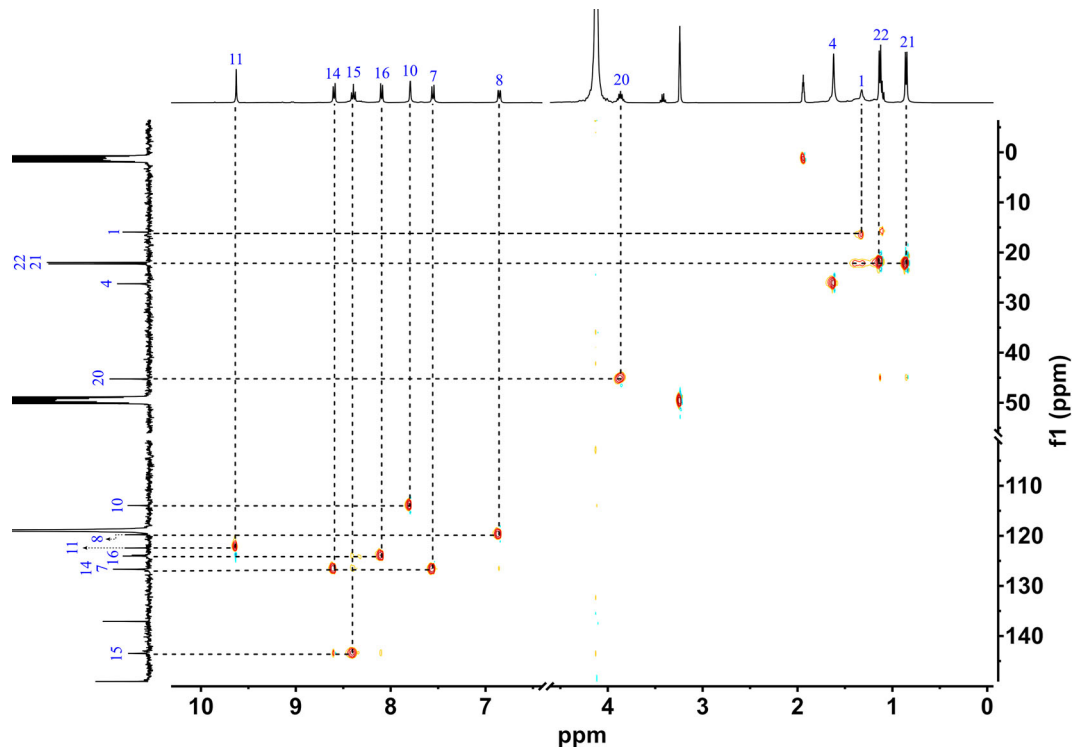

Fig. S27. Partial  $^1\text{H}$ - $^{13}\text{C}$  HSQC spectrum of *T-3* (400 MHz, 298 K, CD<sub>3</sub>CN/CD<sub>3</sub>OD v/v 4/1, [*T-3*] = 2.0 mM).

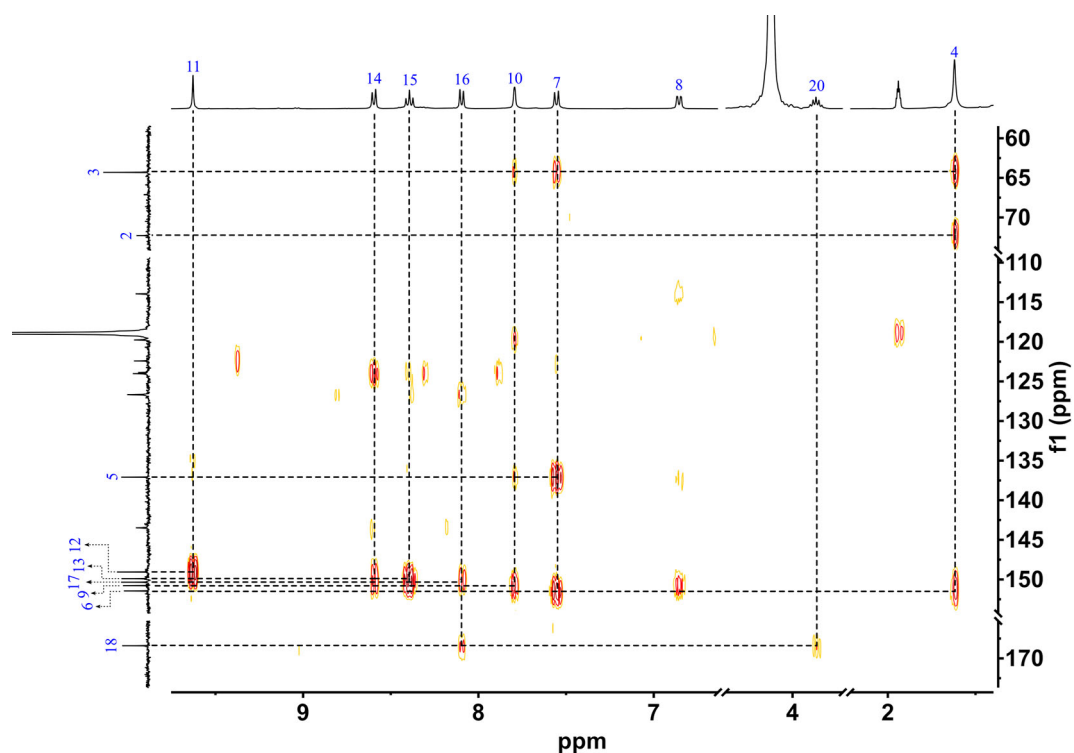

Fig. S28. Partial  $^1\text{H}$ - $^{13}\text{C}$  HMBC spectrum of *T*-**3** (400 MHz, 298 K,  $\text{CD}_3\text{CN}/\text{CD}_3\text{OD}$  v/v 4/1,  $[T\text{-}\mathbf{3}] = 2.0$  mM).

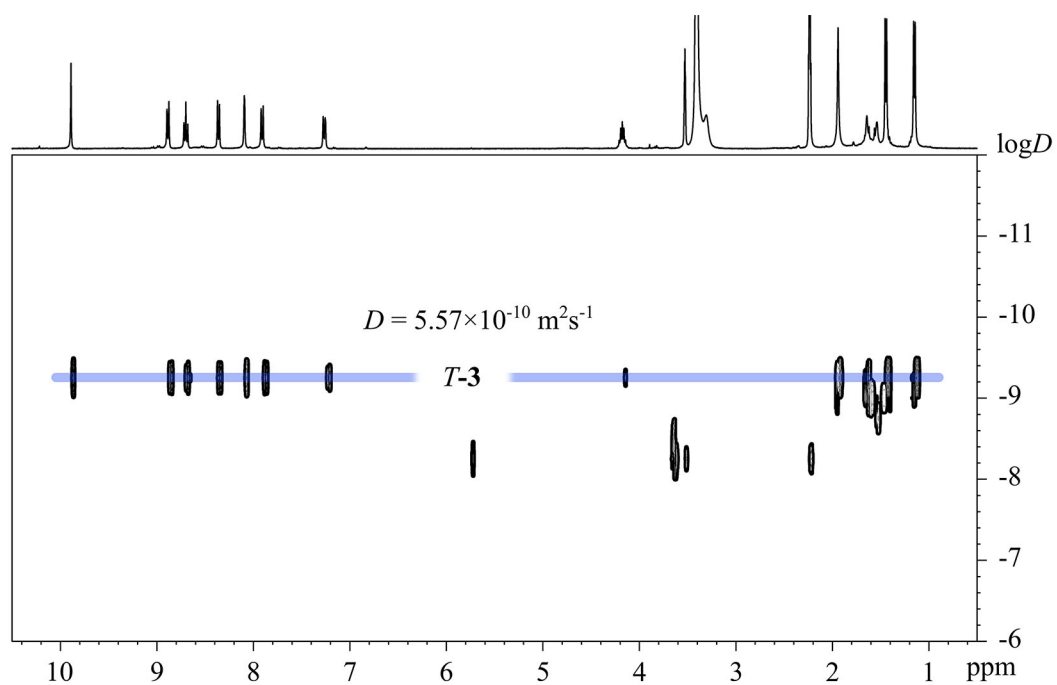

Fig. S29.  $^1\text{H}$  DOSY spectrum of *T*-**3** (400 MHz, 298 K,  $\text{CD}_3\text{CN}/\text{CD}_3\text{OD}$  v/v 4/1,  $[T\text{-}\mathbf{3}] = 2.0$  mM). The hydrodynamic diameter of *T*-**3** was determined to be 2.3 nm.

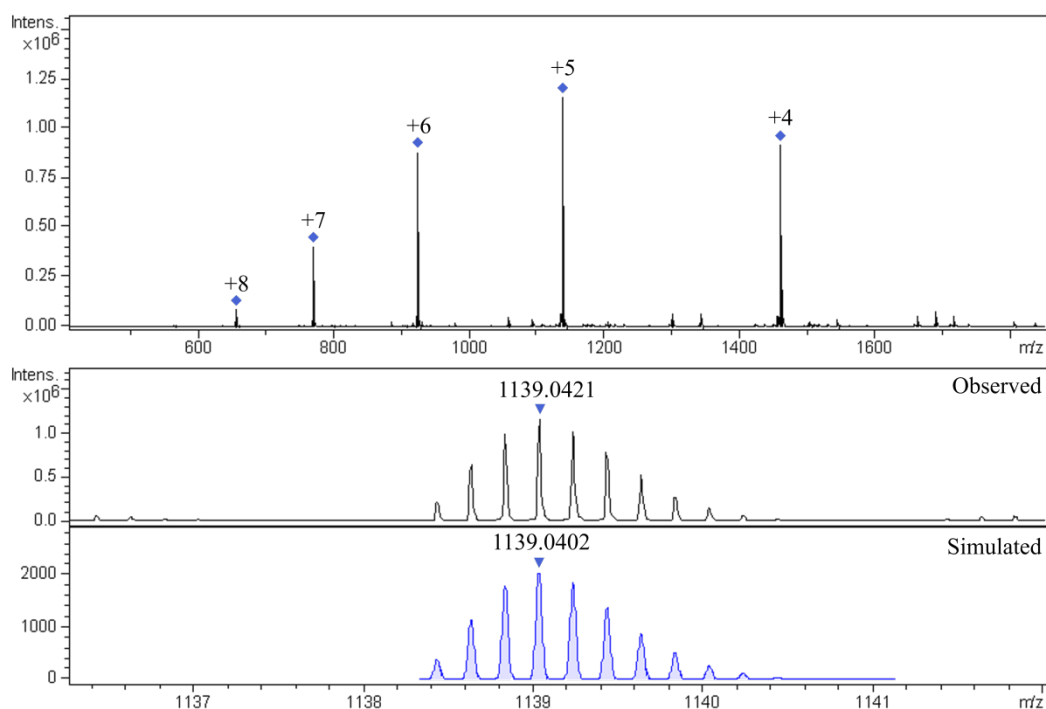

Fig. S30. High-resolution ESI-TOF-MS of *T*-3 with the comparison of observed and simulated isotopic patterns of the peaks +5.

### 3.2.2 Synthesis of cage *S*<sub>4</sub>-4

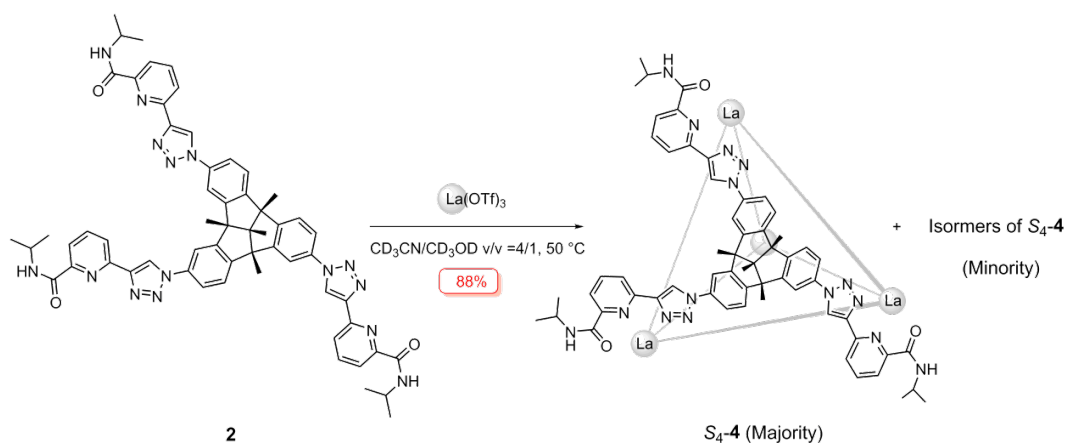

La(OTf)<sub>3</sub> (6.3 mg, 10.7 μmol) and **2** (11.0 mg, 10.7 μmol) were mixed in a solution of CD<sub>3</sub>CN/CD<sub>3</sub>OD (v/v 4/1, 500 μL). After stirring at 50 °C for 0.5 h, the white suspension gradually turned into a colorless solution that was characterized by NMR spectroscopy without further treatment. <sup>1</sup>H NMR spectrum showed that the assembly of **2** with La(OTf)<sub>3</sub> formed a mixed complex with *S*<sub>4</sub>-symmetric cage **4** as the major product, and the NMR yield (88%) of *S*<sub>4</sub>-**4** was determined by adding diethoxydimethylsilane as internal standard.

<sup>1</sup>H NMR (400 MHz, 298 K, CD<sub>3</sub>CN/CD<sub>3</sub>OD v/v 4/1): δ = 9.56 (s, 4H, *H*<sub>51</sub>), 9.43 (m, 8H, *H*<sub>33</sub> and *H*<sub>15</sub>), 8.76 (m, 8H, *H*<sub>36</sub> and *H*<sub>54</sub>), 8.53 (m, 12H, *H*<sub>18</sub>, *H*<sub>37</sub> and *H*<sub>55</sub>), 8.33 (t, *J* = 8.0 Hz, 4H, *H*<sub>19</sub>), 8.18 (m, 8H, *H*<sub>38</sub> and *H*<sub>56</sub>), 8.05 (s, 4H, *H*<sub>49</sub>), 7.98 (d, *J* = 7.9 Hz,

4H,  $H_{20}$ ), 7.87 (s, 4H,  $H_{31}$ ), 7.67 (m, 8H,  $H_{13}$  and  $H_{46}$ ), 7.45 (d,  $J = 8.5$  Hz, 4H,  $H_{10}$ ), 7.38 (d,  $J = 8.5$  Hz, 4H,  $H_{28}$ ), 7.04 (dd,  $J = 8.6, 1.9$  Hz, 4H,  $H_{47}$ ), 6.62 (dd,  $J = 8.5, 1.7$  Hz, 4H,  $H_{11}$ ), 6.33 (dd,  $J = 8.6, 1.7$  Hz, 4H,  $H_{29}$ ), 3.87 – 3.71 (m, 12H,  $H_{24}$ ,  $H_{42}$  and  $H_{60}$ ), 1.66 (m, 36H,  $H_6$ ,  $H_8$  and  $H_7$ ), 1.37 (s, 12H), 1.18 – 1.03 (m, 36H,  $H_{25}$ ,  $H_{43}$  and  $H_{61}$ ), 0.74 (m, 36H,  $H_{26}$ ,  $H_{44}$  and  $H_{62}$ ). High-resolution ESI-TOF-MS for  $S_4$ -4. The following picked signals are those at the highest intensities.  $m/z$  Calcd for  $[S_4$ -4 – 7(OTf)] $^{7+}$  771.0423, found 771.0426; Calcd for  $[S_4$ -4 – 6(OTf)] $^{6+}$  924.3748, found 924.3758; Calcd for  $[S_4$ -4 – 5(OTf)] $^{5+}$  1139.0402, found 1139.0417; Calcd for  $[S_4$ -4 – 4(OTf)] $^{4+}$  1461.0384, found 1461.0401.

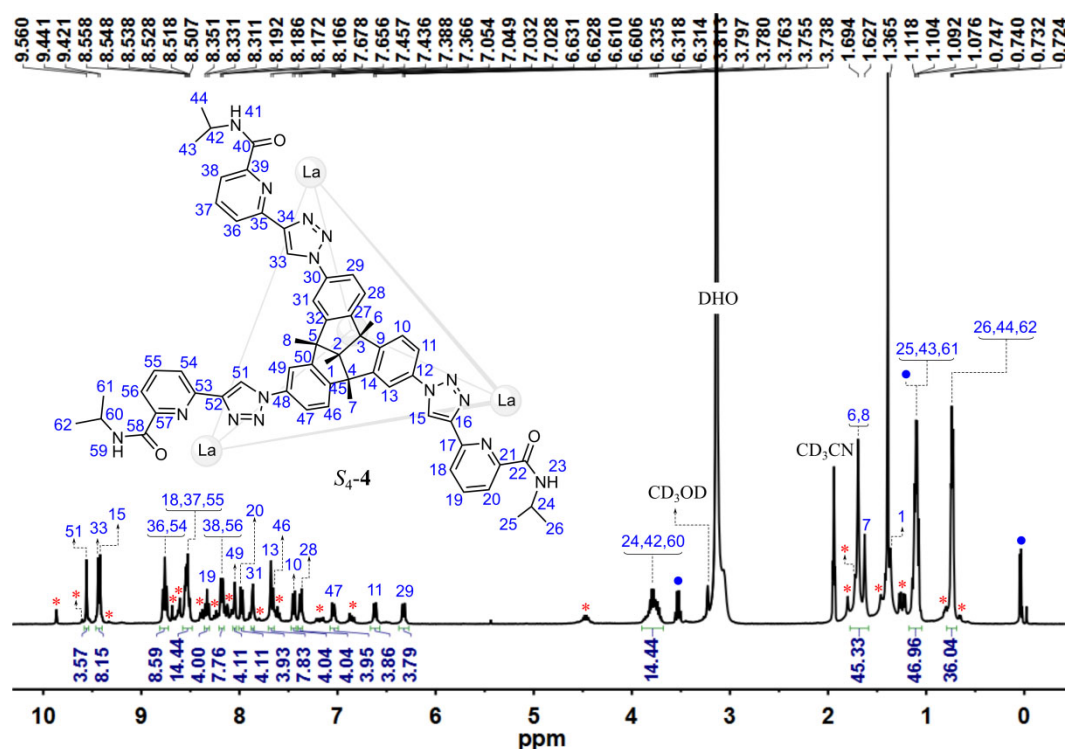

Fig. S31.  $^1\text{H}$  NMR spectrum of  $S_4$ -4 with minor isomers (400 MHz, 298 K,  $\text{CD}_3\text{CN}/\text{CD}_3\text{OD}$  v/v 4/1,  $[S_4$ -4] = 5.4 mM). (\*: Isomers of  $S_4$ -4; •: Inner standard, diethoxydimethylsilane)

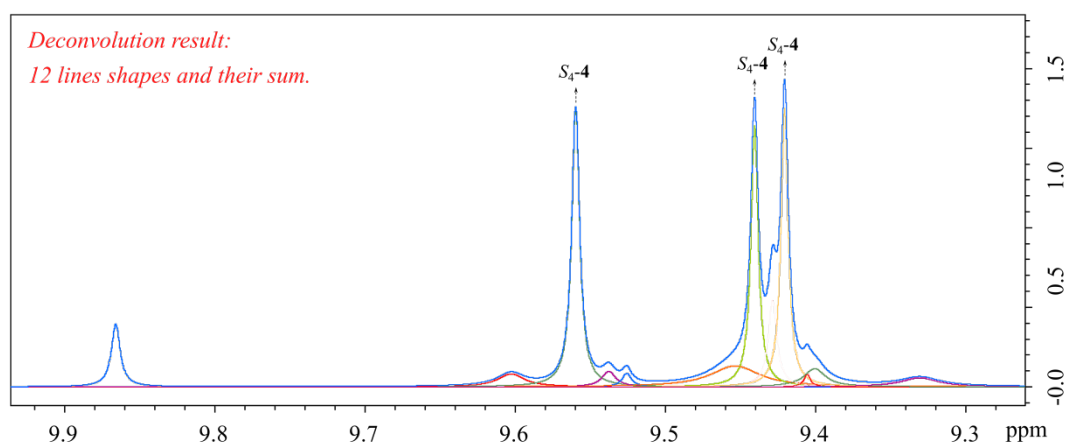

Fig. S32. Deconvolution result of the triazole region of  $^1\text{H}$  NMR spectrum for  $S_4$ -4 with

minor isomers (400 MHz, 298 K, CD<sub>3</sub>CN/CD<sub>3</sub>OD v/v 4/1, [S<sub>4</sub>-4] = 5.4 mM). Multiple overlapping signals in the triazole region are consistent with the coexistence of at least three diastereomers in the mixture.

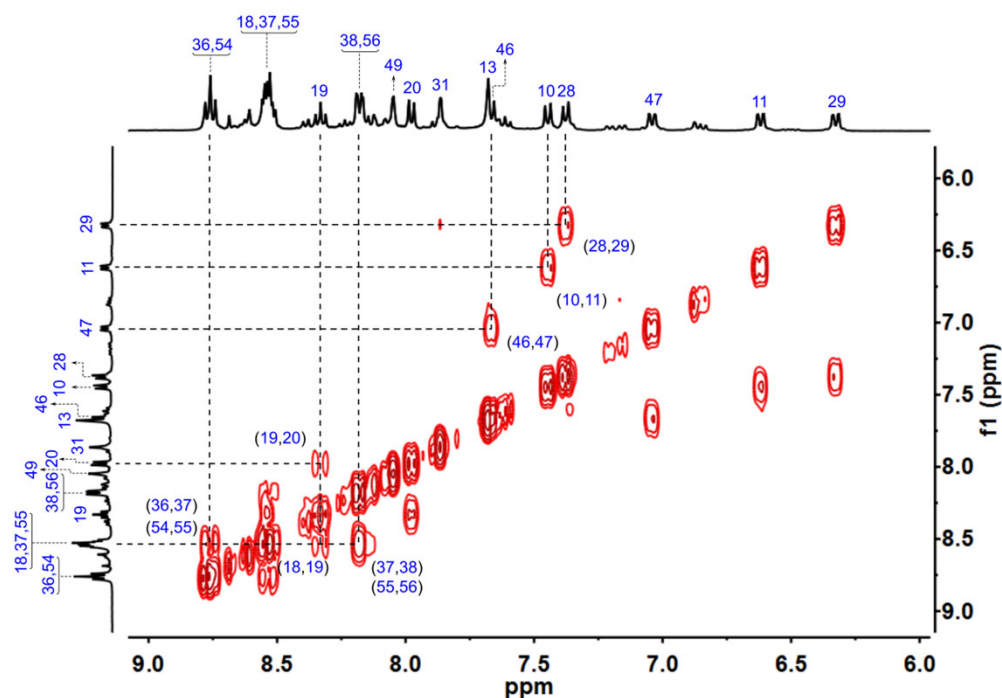

Fig. S33. Partial <sup>1</sup>H-<sup>1</sup>H COSY spectrum of S<sub>4</sub>-4 with minor isomers (400 MHz, 298 K, CD<sub>3</sub>CN/CD<sub>3</sub>OD v/v 4/1, [S<sub>4</sub>-4] = 5.4 mM).

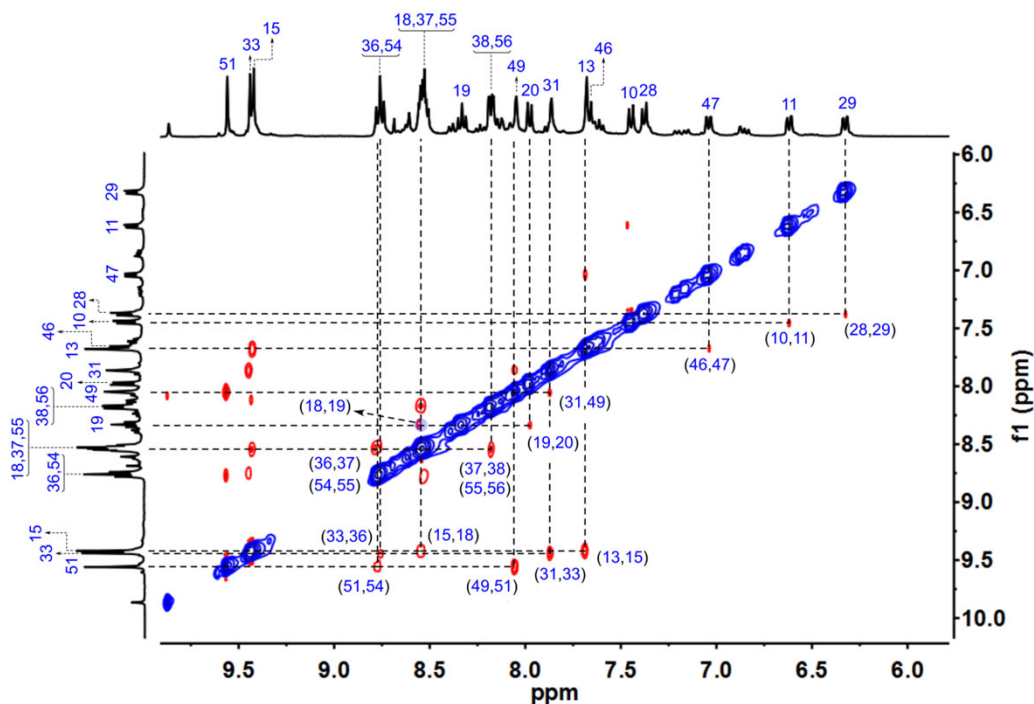

Fig. S34. Partial <sup>1</sup>H-<sup>1</sup>H NOESY spectrum of S<sub>4</sub>-4 with minor isomers (400 MHz, 298 K, CD<sub>3</sub>CN/CD<sub>3</sub>OD v/v 4/1, [S<sub>4</sub>-4] = 5.4 mM).

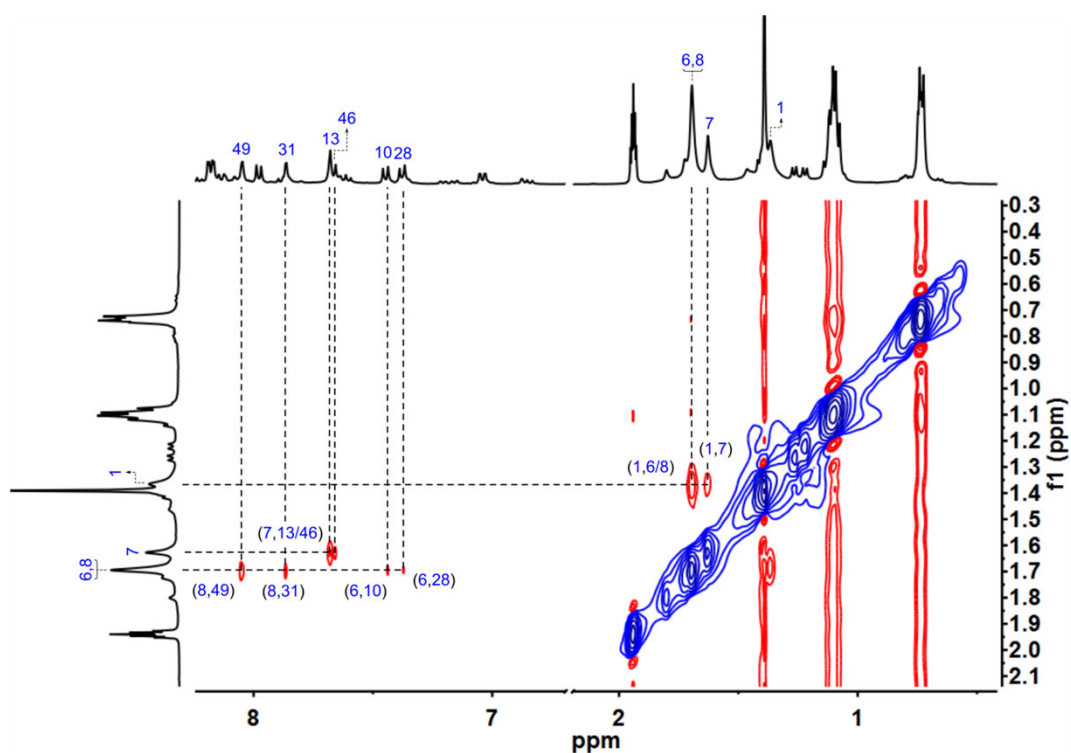

Fig. S35. Partial  $^1\text{H}$ - $^1\text{H}$  NOESY spectrum of  $S_4$ -**4** with minor isomers (400 MHz, 298 K,  $\text{CD}_3\text{CN}/\text{CD}_3\text{OD}$  v/v 4/1,  $[S_4\text{-}\mathbf{4}] = 5.4$  mM).

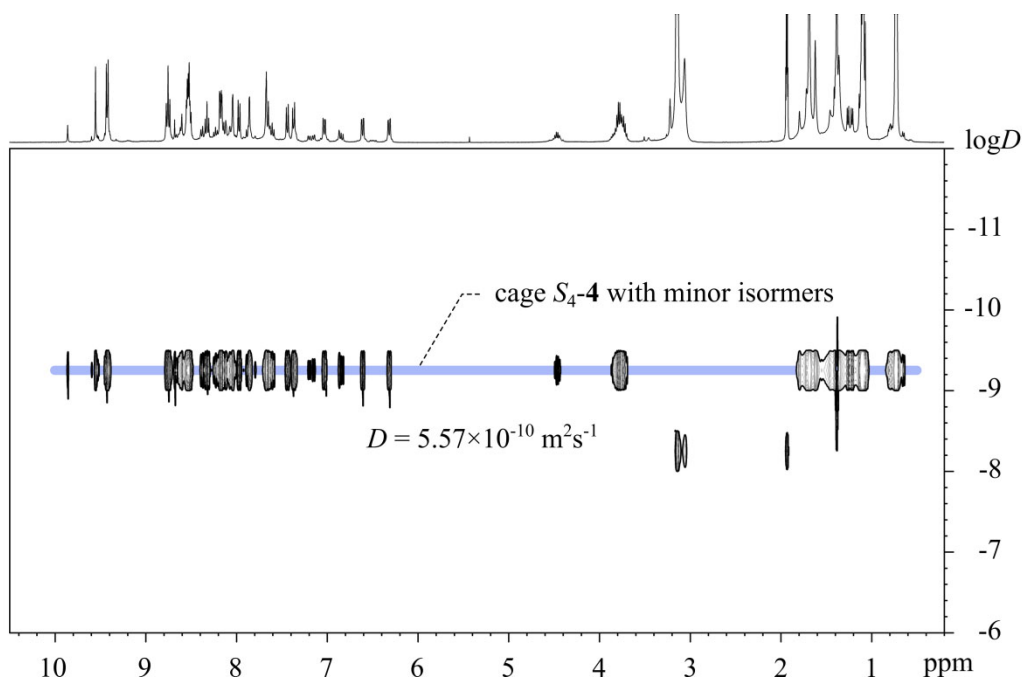

Fig. S36.  $^1\text{H}$  DOSY spectrum of cage  $S_4$ -**4** with minor isomers (400 MHz, 298 K,  $\text{CD}_3\text{CN}/\text{CD}_3\text{OD}$  v/v 4/1,  $[S_4\text{-}\mathbf{4}] = 5.4$  mM). The hydrodynamic diameter of  $S_4$ -**4** was determined to be 2.2 nm.

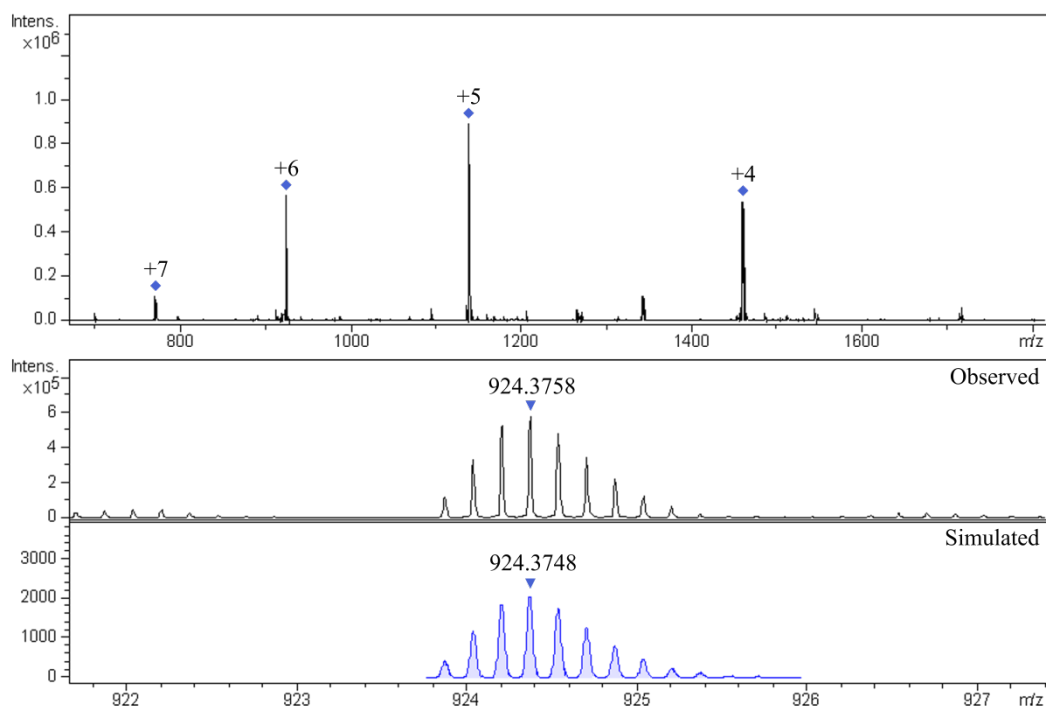

Fig. S37. High-resolution ESI-TOF-MS of *S*<sub>4</sub>-**4** with the comparison of observed and simulated isotopic patterns of the peaks +6.

### 3.3 Host–guest complexes with fullerenes

#### 3.3.1 Encapsulation of C<sub>60</sub> with *T*-**3**

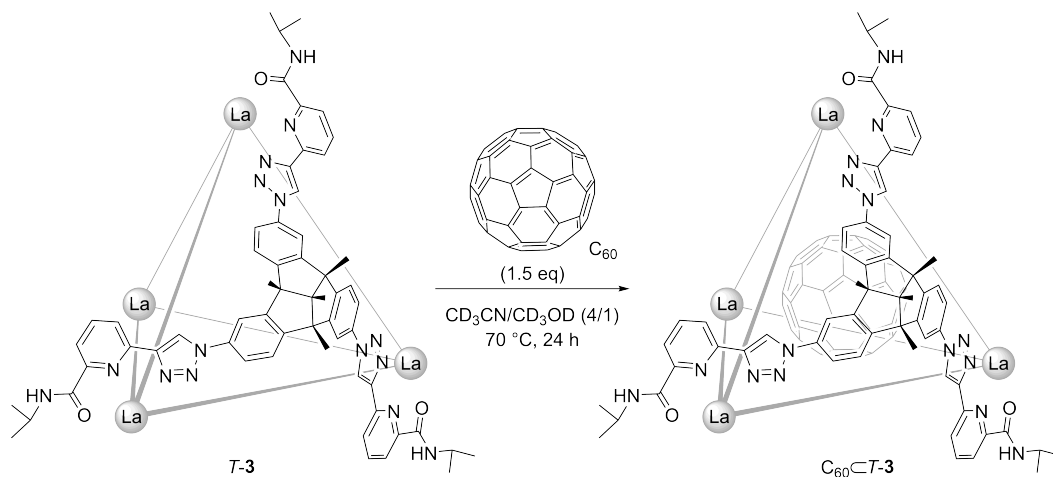

*In situ* self-assembly of  $C_{60}@T\text{-}3$ :  $\text{La}(\text{OTf})_3$  (3.5 mg, 5.9  $\mu\text{mol}$ ), *P*-**1** (6 mg, 5.9  $\mu\text{mol}$ ) and  $C_{60}$  (1.6 mg, 2.2  $\mu\text{mol}$ ) were mixed in a solution of  $\text{CD}_3\text{CN}/\text{CD}_3\text{OD}$  (v/v 4/1, 500  $\mu\text{L}$ ). After stirring at 70 °C for 24 h, the insoluble excess  $C_{60}$  was removed by centrifugation. The resulting solution was further characterized by NMR spectroscopy and high-resolution ESI-TOF-MS.  $^1\text{H}$  NMR spectrum showed the quantitative



formation of  $C_{60}\subset T\text{-}3$  ( $\Delta_4\text{-}P_4$ ). The solvents were dried *in vacuo* to obtain a light purple powder. Yield ca. 10.5 mg, 99%.

$^1\text{H}$  NMR (400 MHz, 298 K,  $\text{CD}_3\text{CN}/\text{CD}_3\text{OD}$  v/v 4/1):  $\delta$  = 9.75 (s, 12H,  $H_{11}$ ), 8.83 (d,  $J$  = 7.8 Hz, 12H,  $H_{14}$ ), 8.47 (d,  $J$  = 7.7 Hz, 12H,  $H_{19}$ ), 8.31 (t,  $J$  = 7.9 Hz, 12H,  $H_{15}$ ), 8.08 (d,  $J$  = 7.7 Hz, 12H,  $H_{16}$ ), 7.84 (d,  $J$  = 8.5 Hz, 12H,  $H_7$ ), 7.70 (s,  $H_{10}$ ), 7.39 (d,  $J$  = 6.3 Hz, 12H,  $H_8$ ), 4.20 – 4.10 (m, 12H,  $H_{20}$ ), 1.53 (s, 36H,  $H_4$ ), 1.30 (d,  $J$  = 6.5 Hz, 36H,  $H_{22}$ ), 1.24 (s, 12H,  $H_1$ ), 1.10 (d,  $J$  = 6.5 Hz, 36H,  $H_{21}$ ).  $^{13}\text{C}$  NMR (101 MHz, 298 K,  $\text{CD}_3\text{CN}/\text{CD}_3\text{OD}$  v/v 4/1):  $\delta$  = 168.71, 150.47, 150.36, 150.28, 149.76, 149.03, 142.95, 141.49 (encapsulated  $C_{60}$ ), 137.82, 127.22, 126.03, 123.83, 123.67, 121.85, 120.65, 120.18, 113.01, 71.11, 63.50, 45.84, 31.58, 25.99, 21.83, 20.43. High-resolution ESI-TOF-MS for  $C_{60}\subset T\text{-}3$ . The following picked signals are those at the highest intensities.  $m/z$  Calcd for  $[C_{60}\subset T\text{-}3 - 6(\text{OTf})]^{6+}$  1044.5419, found 1044.5410; Calcd for  $[C_{60}\subset T\text{-}3 - 5(\text{OTf})]^{5+}$  1283.2407, found 1283.2407; Calcd for  $[C_{60}\subset T\text{-}3 - 4(\text{OTf})]^{4+}$  1641.2890, found 1641.2892.

Encapsulation of  $C_{60}$  with preformed cage  $T\text{-}3$  ( $\Delta_4\text{-}P_4$ ):  $T\text{-}3$  (8 mg, 1.3  $\mu\text{mol}$ ) and  $C_{60}$  (1.4 mg, 2.0  $\mu\text{mol}$ ) were mixed in a solution of  $\text{CD}_3\text{CN}/\text{CD}_3\text{OD}$  (v/v 4/1, 500  $\mu\text{L}$ ). The mixture was stirred at 70  $^\circ\text{C}$  for 24 h and monitored by  $^1\text{H}$  NMR.

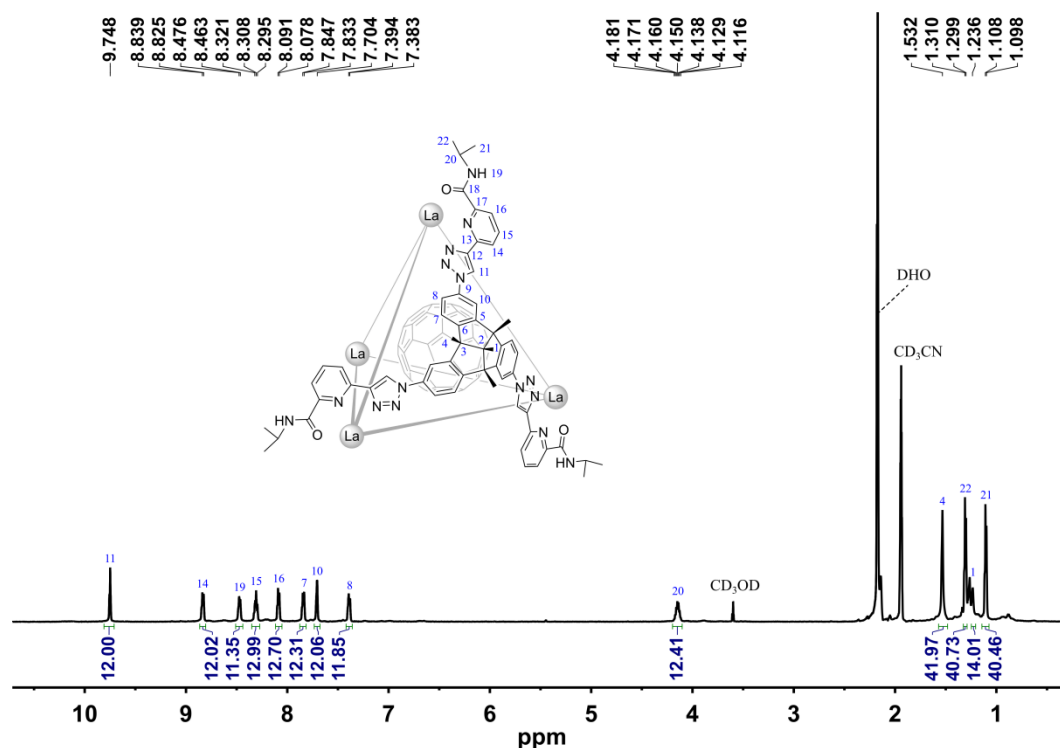

Fig. S38.  $^1\text{H}$  NMR spectrum of  $C_{60}\subset T\text{-}3$  (400 MHz, 298 K,  $\text{CD}_3\text{CN}/\text{CD}_3\text{OD}$  v/v 4/1,  $[C_{60}\subset T\text{-}3] = 2.9$  mM), where  $T\text{-}3$  is homochiral  $\Delta_4\text{-}P_4$ .



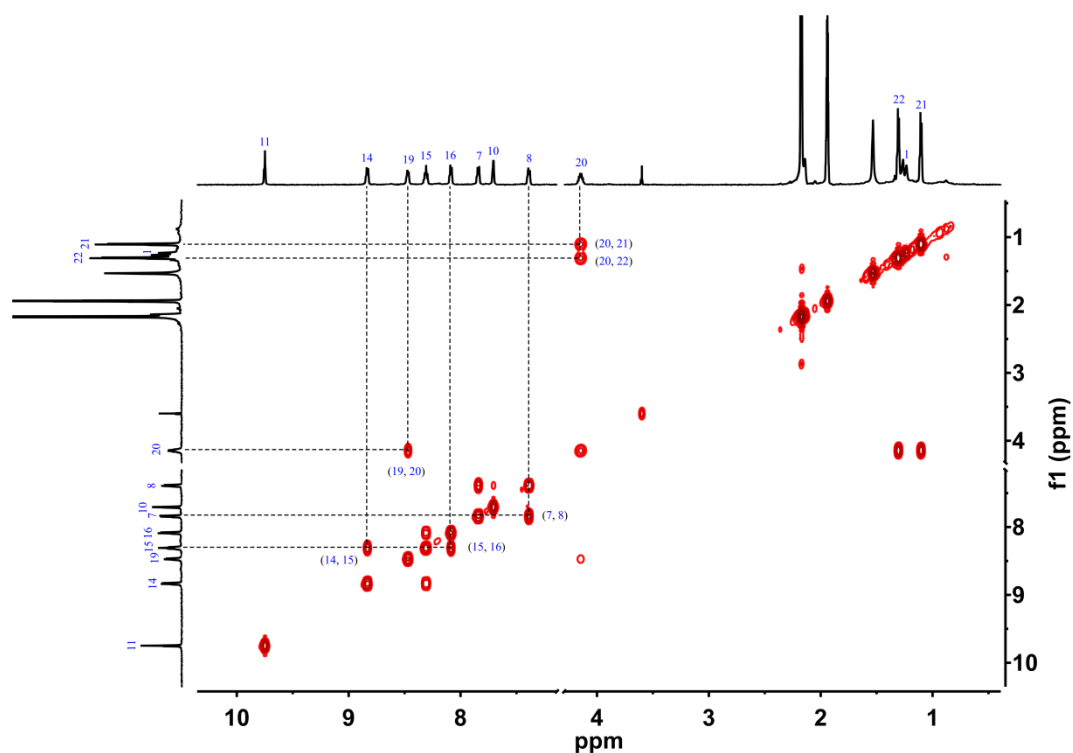

Fig. S39. Partial  $^1\text{H}$ - $^1\text{H}$  COSY spectrum of  $\text{C}_{60}\text{C-T-3}$  (400 MHz, 298 K,  $\text{CD}_3\text{CN}/\text{CD}_3\text{OD}$  v/v 4/1,  $[\text{C}_{60}\text{C-T-3}] = 2.9$  mM), where  $T\text{-3}$  is homochiral  $\Delta_4\text{-P}_4$ .

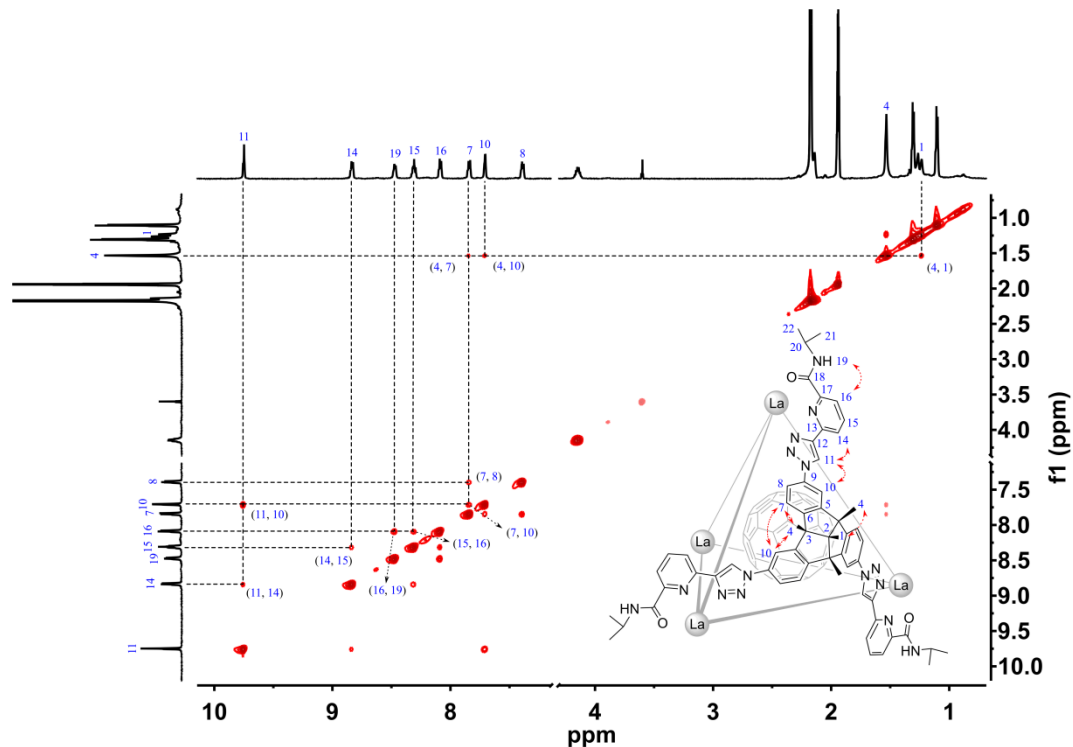

Fig. S40. Partial  $^1\text{H}$ - $^1\text{H}$  NOESY spectrum of  $\text{C}_{60}\text{C-T-3}$  (400 MHz, 298 K,  $\text{CD}_3\text{CN}/\text{CD}_3\text{OD}$  v/v 4/1,  $[\text{C}_{60}\text{C-T-3}] = 2.9$  mM), where  $T\text{-3}$  is homochiral  $\Delta_4\text{-P}_4$ .

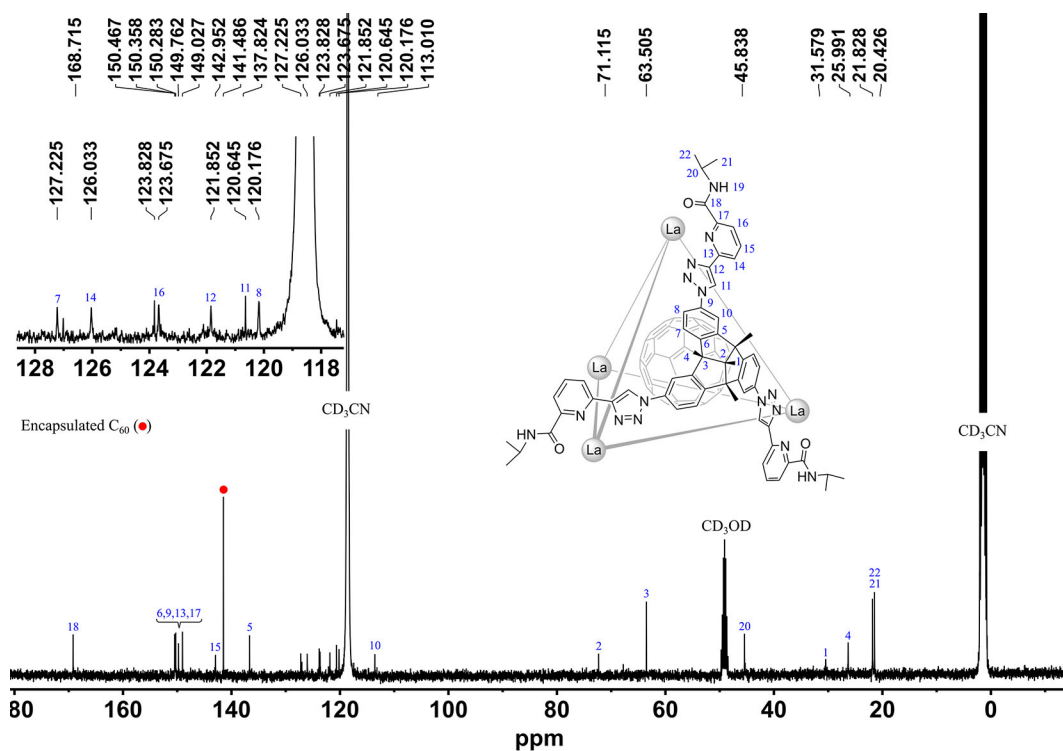

Fig. S41.  $^{13}\text{C}$  NMR spectrum of  $\text{C}_{60}\text{-}T\text{-}3$  (400 MHz, 298 K,  $\text{CD}_3\text{CN}/\text{CD}_3\text{OD}$  v/v 4/1,  $[\text{C}_{60}\text{-}T\text{-}3] = 2.9$  mM), where  $T\text{-}3$  is homochiral  $\Delta_4\text{-}P_4$ .

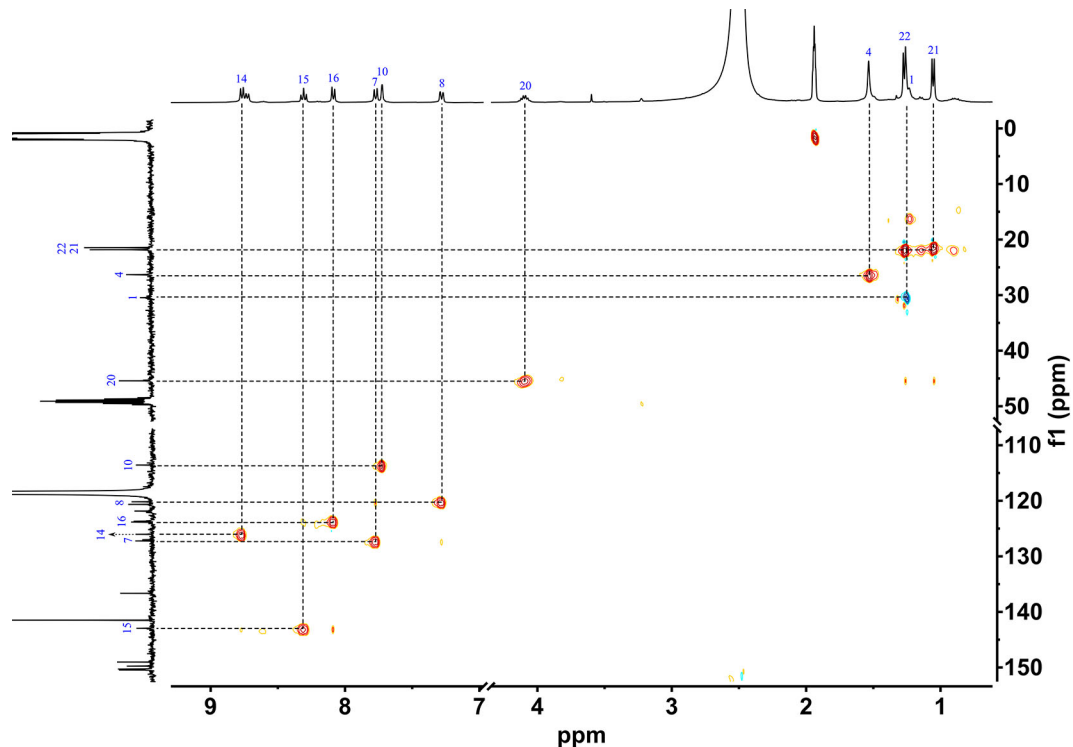

Fig. S42. Partial  $^1\text{H}$ - $^{13}\text{C}$  HSQC spectrum of  $\text{C}_{60}\text{-}T\text{-}3$  (400 MHz, 298 K,  $\text{CD}_3\text{CN}/\text{CD}_3\text{OD}$  v/v 4/1,  $[\text{C}_{60}\text{-}T\text{-}3] = 2.9$  mM), where  $T\text{-}3$  is homochiral  $\Delta_4\text{-}P_4$ .

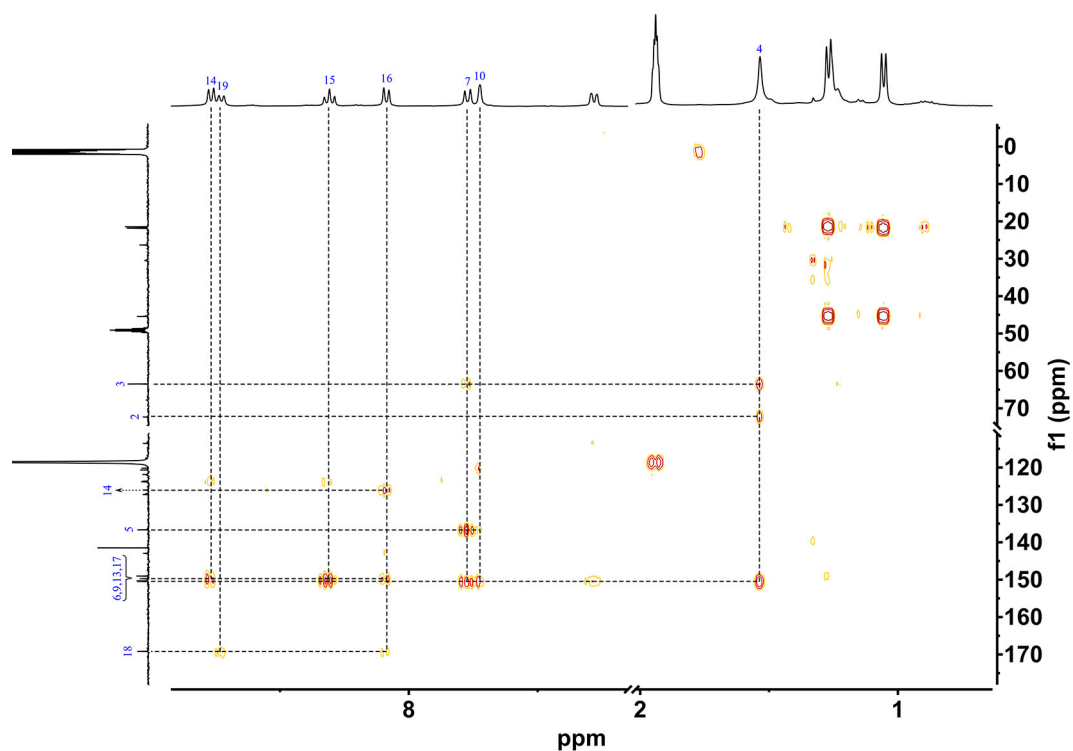

Fig. S43. Partial  $^1\text{H}$ - $^{13}\text{C}$  HMBC spectrum of  $\text{C}_{60}\text{C}T\text{-3}$  (400 MHz, 298 K,  $\text{CD}_3\text{CN}/\text{CD}_3\text{OD}$  v/v 4/1,  $[\text{C}_{60}\text{C}T\text{-3}] = 2.9$  mM), where  $T\text{-3}$  is homochiral  $\Delta_4\text{-P}_4$ .

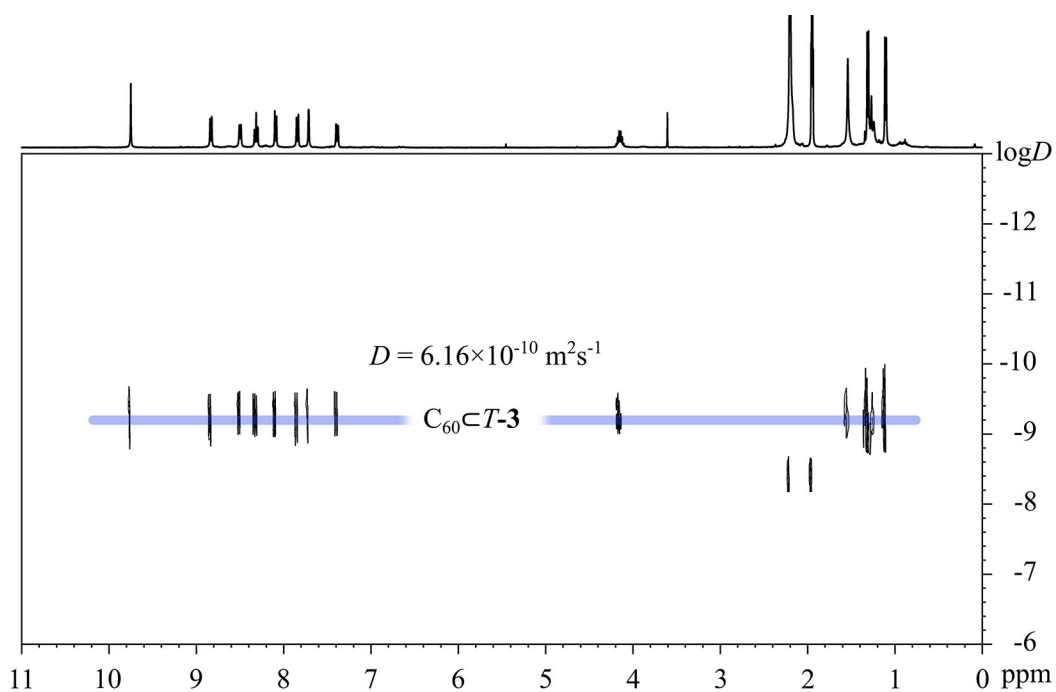

Fig. S44.  $^1\text{H}$  DOSY spectrum of  $\text{C}_{60}\text{C}T\text{-3}$  (400 MHz, 298 K,  $\text{CD}_3\text{CN}/\text{CD}_3\text{OD}$  v/v 4/1,  $[\text{C}_{60}\text{C}T\text{-3}] = 2.9$  mM), where  $T\text{-3}$  is homochiral  $\Delta_4\text{-P}_4$ . The hydrodynamic diameter of  $\text{C}_{60}\text{C}T\text{-3}$  was determined to be 2.1 nm.

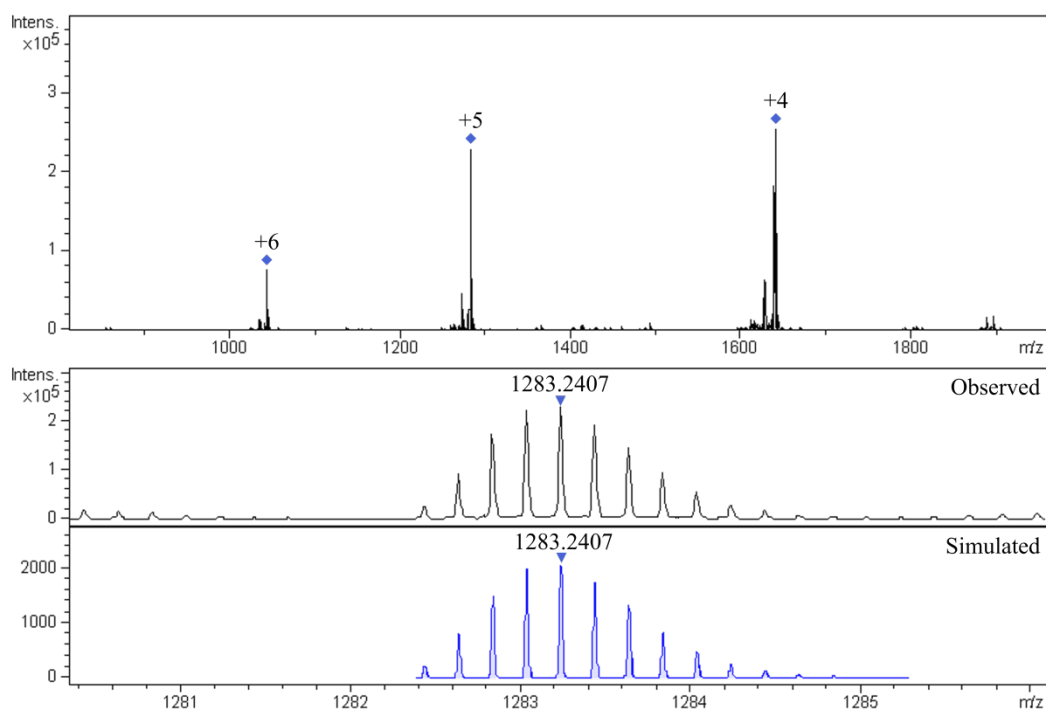

Fig. S45. High-resolution ESI-TOF-MS of  $C_{60}\text{-}T\text{-}3$  with the comparison of observed and simulated isotopic patterns of the peaks +5.

### 3.3.2 Encapsulation of $C_{70}$ with $T\text{-}3$

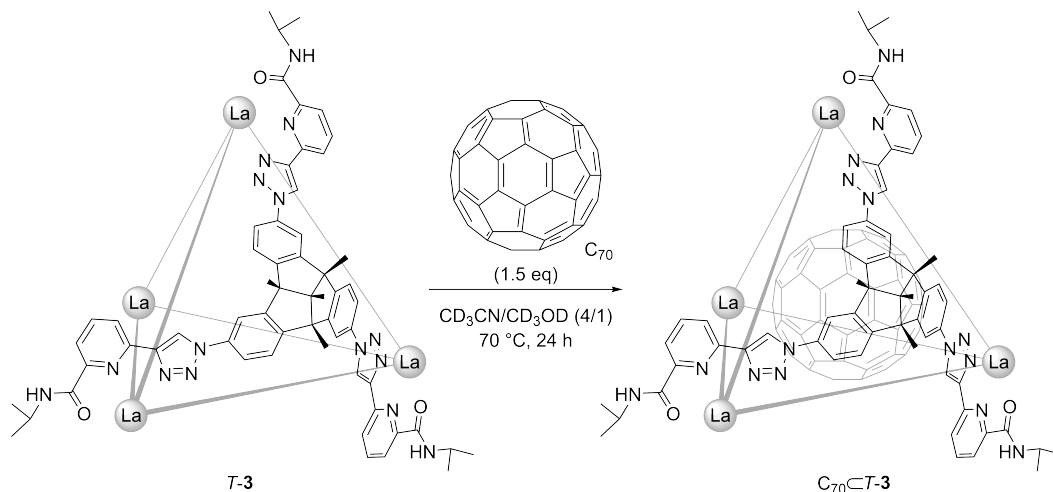

*In situ* self-assembly of  $C_{70}\text{-}T\text{-}3$ :  $\text{La}(\text{OTf})_3$  (3.5 mg, 5.9  $\mu\text{mol}$ ),  $P\text{-}1$  (6 mg, 5.9  $\mu\text{mol}$ ) and  $C_{70}$  (1.8 mg, 2.2  $\mu\text{mol}$ ) were mixed in a solution of  $\text{CD}_3\text{CN}/\text{CD}_3\text{OD}$  (v/v 4/1, 500  $\mu\text{L}$ ). After stirring at 70  $^\circ\text{C}$  for 24 h, the insoluble excess  $C_{70}$  was removed by centrifugation. The resulting solution was further characterized by NMR spectroscopy and high-resolution ESI-TOF-MS.  $^1\text{H}$  NMR spectrum showed the quantitative formation of  $C_{70}\text{-}T\text{-}3$  ( $\Delta_4\text{-}P_4$ ). The solvents were dried *in vacuo* to obtain a light grey powder. Yield ca. 10.4 mg, 97%.

$^1\text{H}$  NMR (400 MHz, 298 K,  $\text{CD}_3\text{CN}/\text{CD}_3\text{OD}$  v/v 4/1):  $\delta$  = 9.57 (s, 12H,  $H_{11}$ ), 8.70 (d,  $J$  = 8.0 Hz, 15H,  $H_{14}$  and  $H_{19}$ ), 8.36 (t,  $J$  = 8.0 Hz, 12H,  $H_{15}$ ), 8.06 (d,  $J$  = 8.0 Hz, 12H,  $H_{16}$ ), 7.70 (s, 12H,  $H_{10}$ ), 7.58 (d,  $J$  = 8.6 Hz, 12H,  $H_7$ ), 6.97 (d,  $J$  = 10.0 Hz, 12H,  $H_8$ ), 3.98 – 3.91 (m, 12H,  $H_{20}$ ), 1.58 (s, 36H,  $H_4$ ), 1.25 (s, 12H,  $H_1$ ), 1.19 (d,  $J$  = 6.6 Hz, 36H,  $H_{22}$ ), 0.94 (d,  $J$  = 6.6 Hz, 36H,  $H_{21}$ ).  $^{13}\text{C}$  NMR (101 MHz, 298 K,  $\text{CD}_3\text{CN}/\text{CD}_3\text{OD}$  v/v 4/1):  $\delta$  = 168.75, 150.84 (encapsulated  $\text{C}_{70}$ ), 150.14, 150.08, 149.63, 149.05, 148.73, 147.14 (encapsulated  $\text{C}_{70}$ ), 145.82 (encapsulated  $\text{C}_{70}$ ), 143.92 (encapsulated  $\text{C}_{70}$ ), 142.83, 136.39, 129.27 (encapsulated  $\text{C}_{70}$ ), 126.63, 125.87, 123.73, 123.13, 121.50, 120.59, 120.14, 112.83, 72.93, 63.31, 43.64, 31.90, 26.22, 21.79, 21.76. High-resolution ESI-TOF-MS for  $\text{C}_{70}\text{C}-T\text{-3}$ . The following picked signals are those at the highest intensities.  $m/z$  Calcd for  $[\text{C}_{70}\text{C}-T\text{-3} - 6(\text{OTf})]^{6+}$  1064.5422, found 1064.5415; Calcd for  $[\text{C}_{70}\text{C}-T\text{-3} - 5(\text{OTf})]^{5+}$  1307.2408, found 1307.2403; Calcd for  $[\text{C}_{70}\text{C}-T\text{-3} - 4(\text{OTf})]^{4+}$  1671.2891, found 1671.2883.

Encapsulation of  $\text{C}_{70}$  with preformed cage  $T\text{-3}$  ( $\Delta_4\text{-P}_4$ ):  $T\text{-3}$  (8 mg, 1.3  $\mu\text{mol}$ ) and  $\text{C}_{70}$  (1.7 mg, 2.0  $\mu\text{mol}$ ) were mixed in a solution of  $\text{CD}_3\text{CN}/\text{CD}_3\text{OD}$  (v/v 4/1, 500  $\mu\text{L}$ ). The mixture was stirred at 70  $^\circ\text{C}$  for 24 h and monitored by  $^1\text{H}$  NMR.

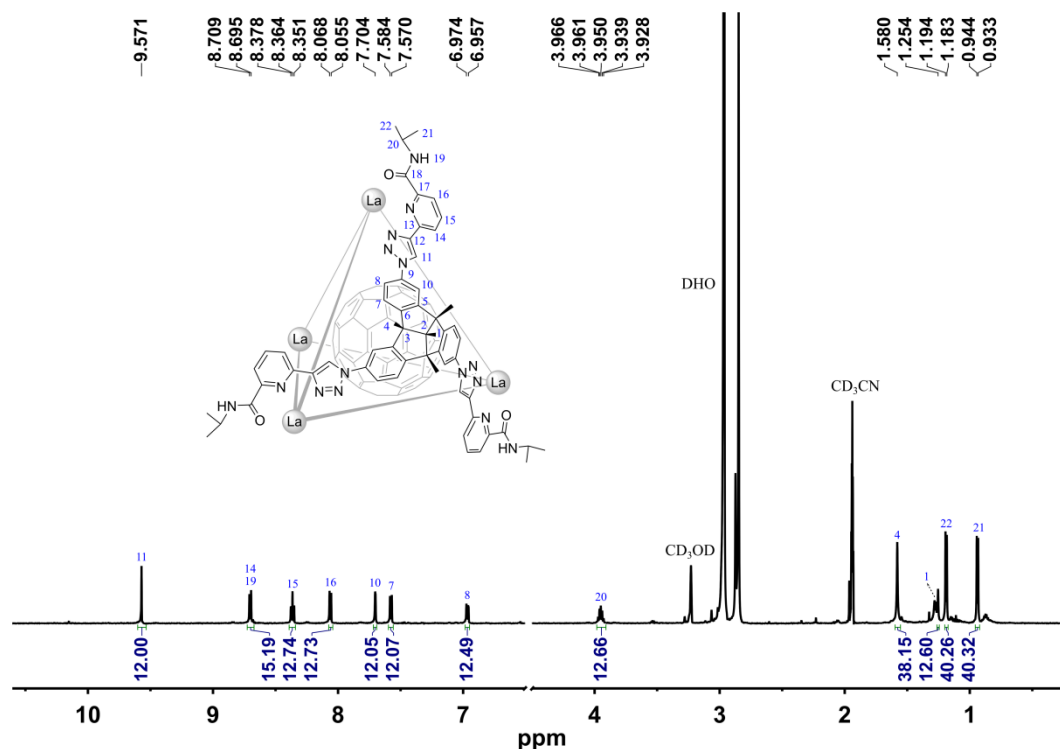

Fig. S46.  $^1\text{H}$  NMR spectrum of  $\text{C}_{70}\text{C}-T\text{-3}$  (400 MHz, 298 K,  $\text{CD}_3\text{CN}/\text{CD}_3\text{OD}$  v/v 4/1,  $[\text{C}_{70}\text{C}-T\text{-3}] = 2.9$  mM), where  $T\text{-3}$  is homochiral  $\Delta_4\text{-P}_4$ .

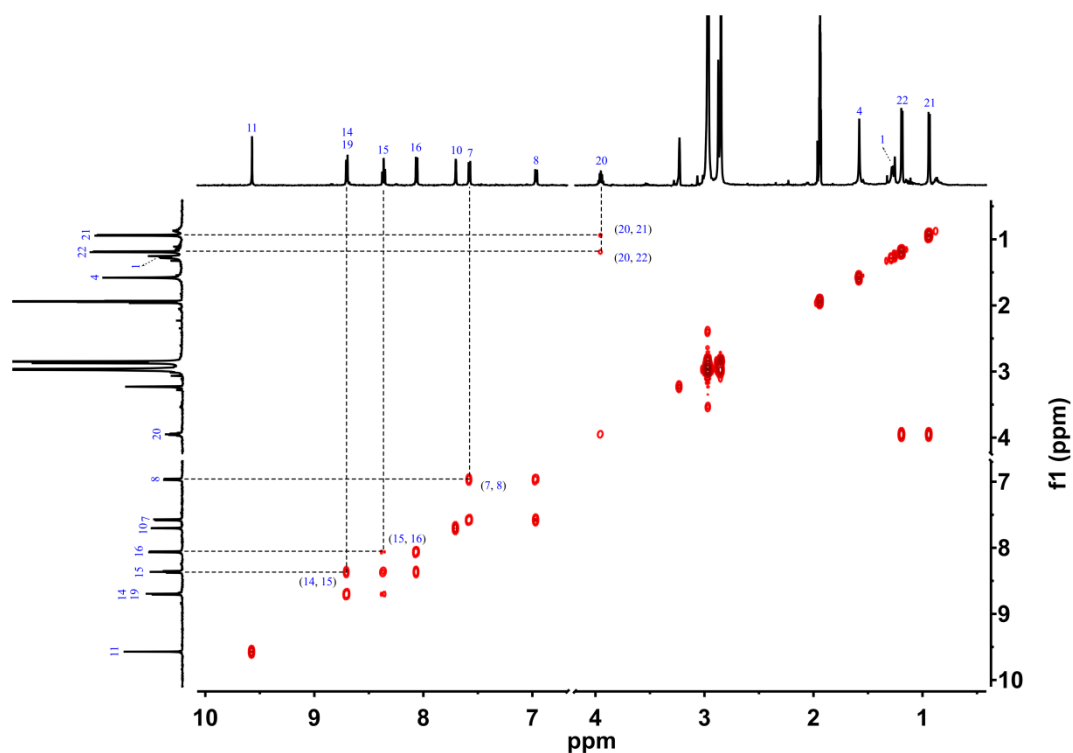

Fig. S47. Partial  $^1\text{H}$ - $^1\text{H}$  COSY spectrum of  $\text{C}_{70}\text{-}T\text{-}3$  (400 MHz, 298 K,  $\text{CD}_3\text{CN}/\text{CD}_3\text{OD}$  v/v 4/1,  $[\text{C}_{70}\text{-}T\text{-}3] = 2.9$  mM), where  $T\text{-}3$  is homochiral  $\Delta_4\text{-}P_4$ .

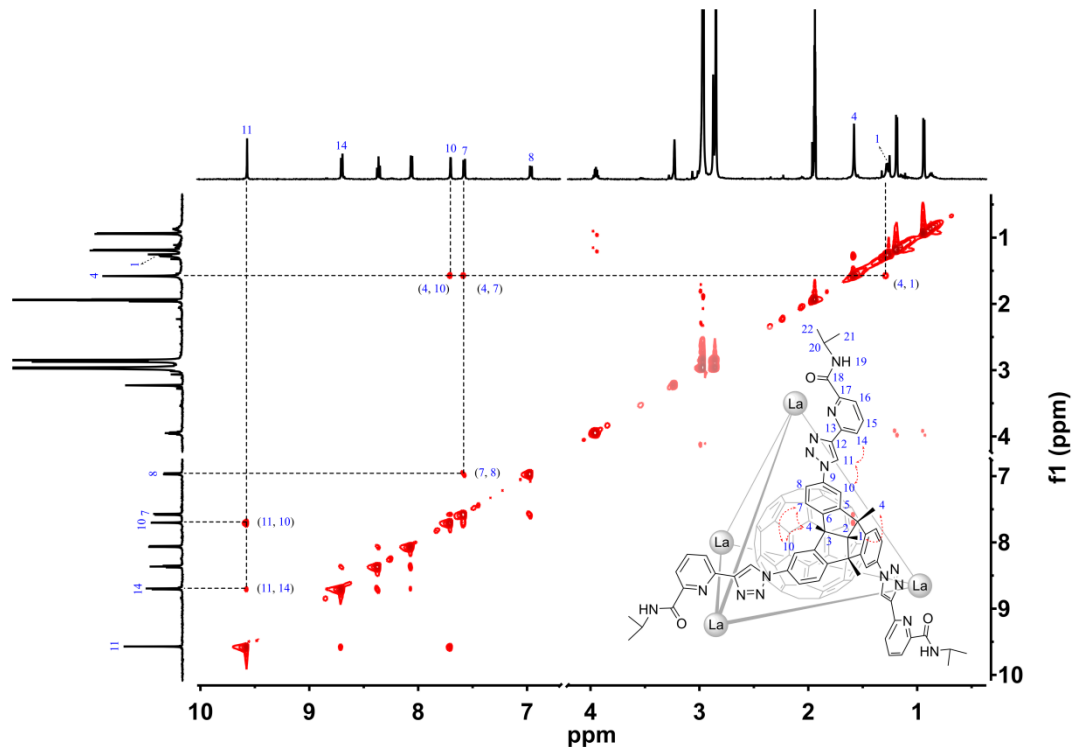

Fig. S48. Partial  $^1\text{H}$ - $^1\text{H}$  NOESY spectrum of  $\text{C}_{70}\text{-}T\text{-}3$  (400 MHz, 298 K,  $\text{CD}_3\text{CN}/\text{CD}_3\text{OD}$  v/v 4/1,  $[\text{C}_{70}\text{-}T\text{-}3] = 2.9$  mM), where  $T\text{-}3$  is homochiral  $\Delta_4\text{-}P_4$ .

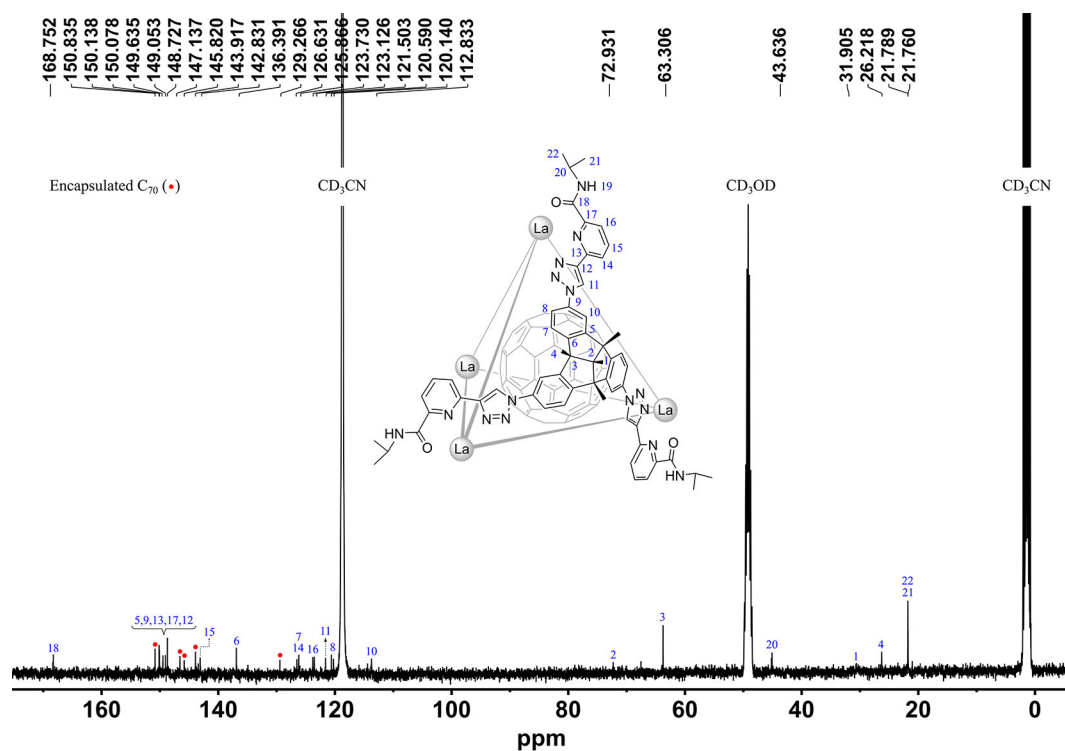

Fig. S49.  $^{13}\text{C}$  NMR spectrum of  $\text{C}_{70}\text{-}T\text{-}3$  (400 MHz, 298 K,  $\text{CD}_3\text{CN}/\text{CD}_3\text{OD}$  v/v 4/1,  $[\text{C}_{70}\text{-}T\text{-}3] = 2.9$  mM), where  $T\text{-}3$  is homochiral  $\Delta_4\text{-}P_4$ . (●: encapsulated  $\text{C}_{70}$ )

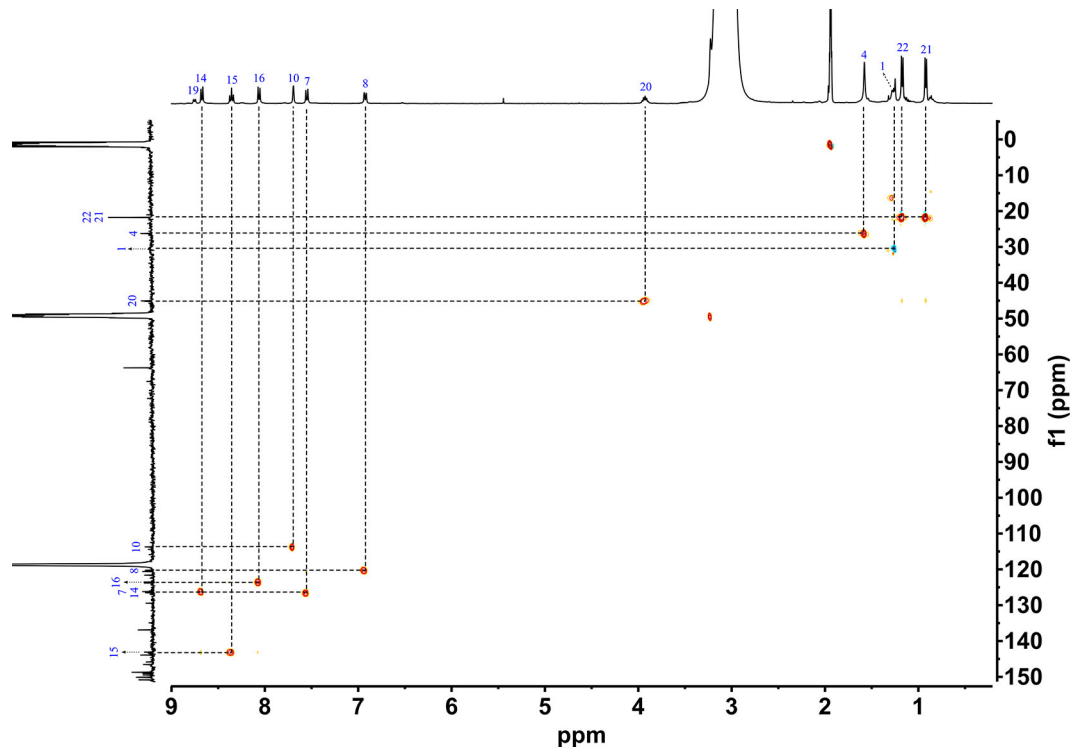

Fig. S50. Partial  $^1\text{H}\text{-}^{13}\text{C}$  HSQC spectrum of  $\text{C}_{70}\text{-}T\text{-}3$  (400 MHz, 298 K,  $\text{CD}_3\text{CN}/\text{CD}_3\text{OD}$  v/v 4/1,  $[\text{C}_{70}\text{-}T\text{-}3] = 2.9$  mM), where  $T\text{-}3$  is homochiral  $\Delta_4\text{-}P_4$ .

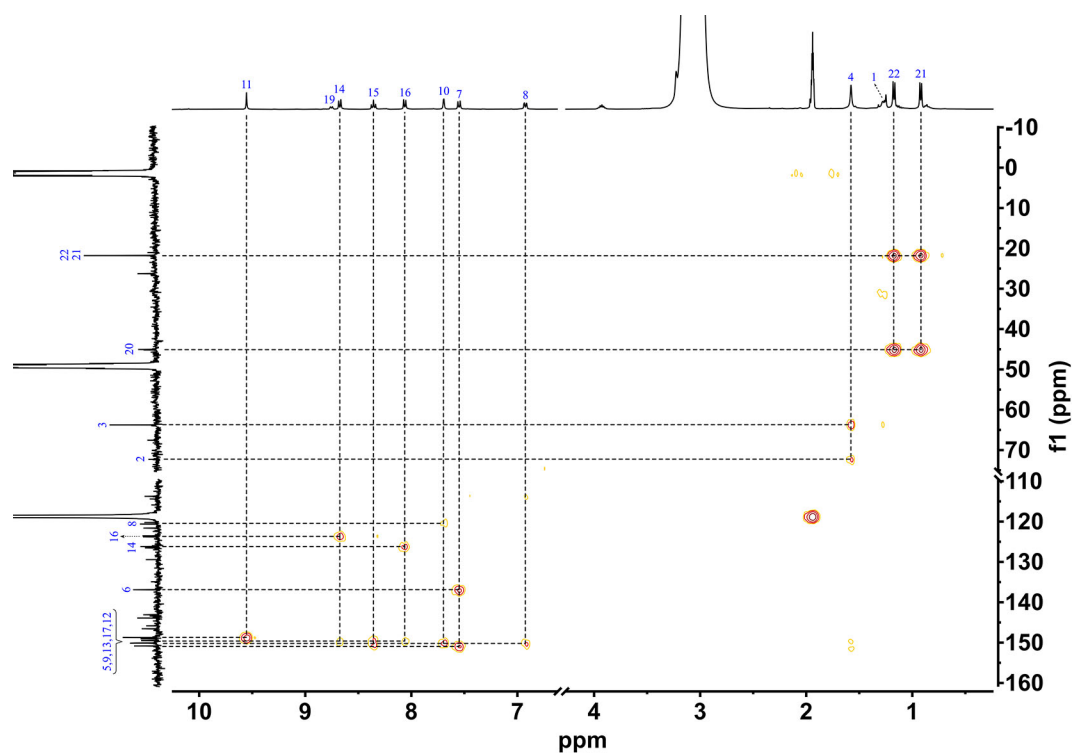

Fig. S51. Partial  $^1\text{H}$ - $^{13}\text{C}$  HMBC spectrum of  $\text{C}_{70}\text{C-T-3}$  (400 MHz, 298 K,  $\text{CD}_3\text{CN}/\text{CD}_3\text{OD}$  v/v 4/1,  $[\text{C}_{70}\text{C-T-3}] = 2.9$  mM), where  $\text{T-3}$  is homochiral  $\Delta_4\text{-P}_4$ .

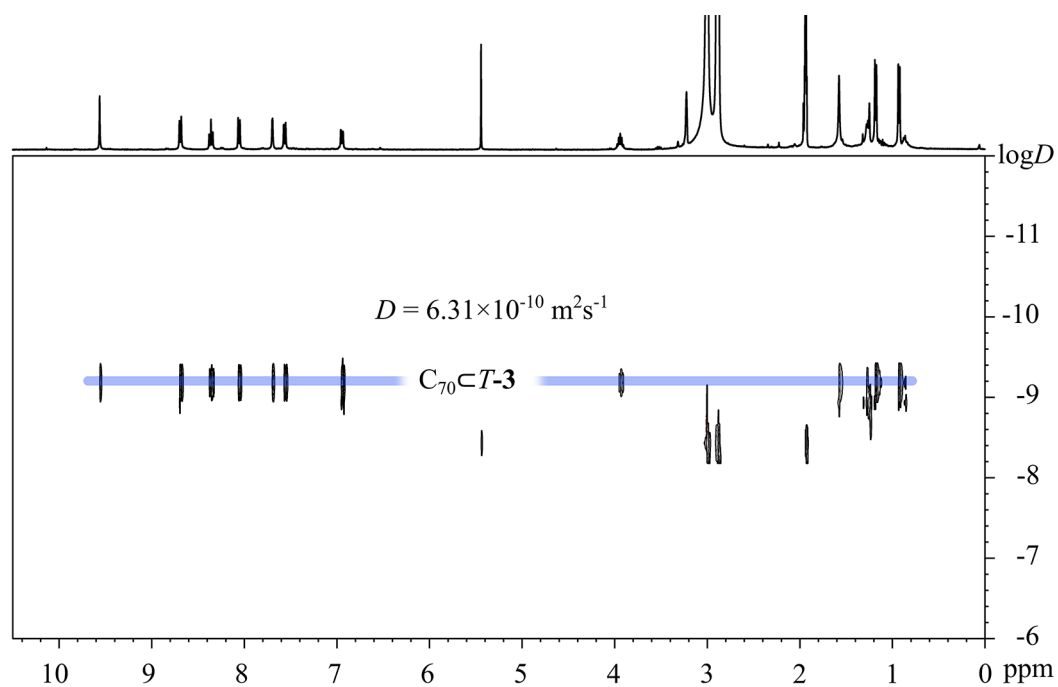

Fig. S52.  $^1\text{H}$  DOSY spectrum of  $\text{C}_{70}\text{C-T-3}$  (400 MHz, 298 K,  $\text{CD}_3\text{CN}/\text{CD}_3\text{OD}$  v/v 4/1,  $[\text{C}_{70}\text{C-T-3}] = 2.9$  mM), where  $\text{T-3}$  is homochiral  $\Delta_4\text{-P}_4$ . The hydrodynamic diameter of  $\text{C}_{70}\text{C-T-3}$  was determined to be 2.0 nm.



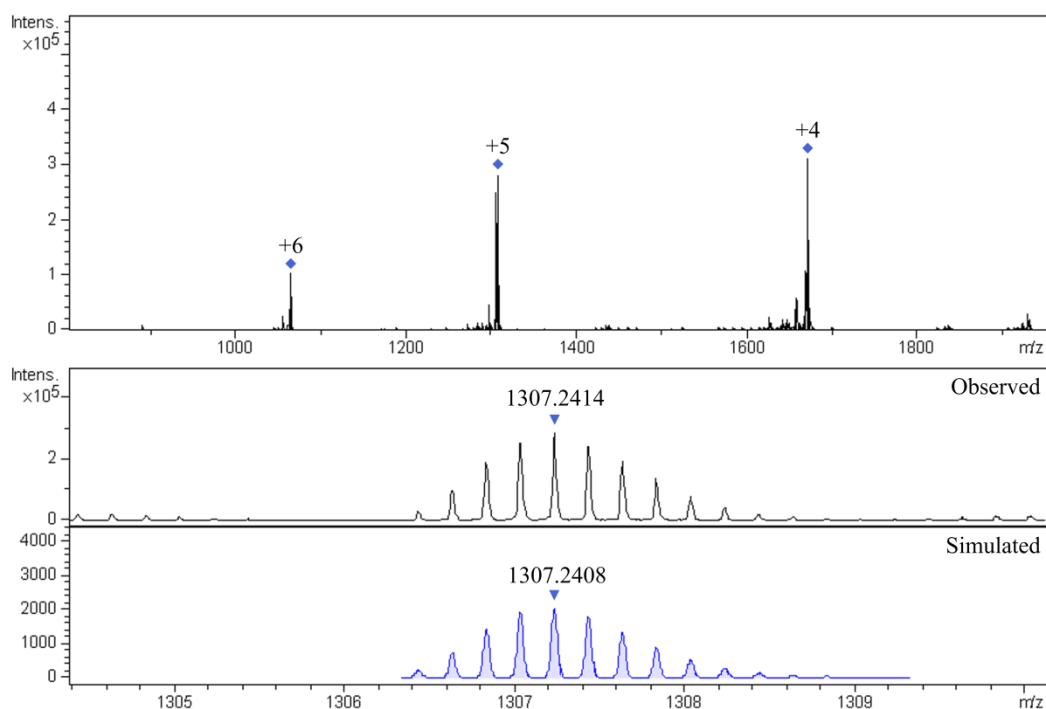

Fig. S53. High-resolution ESI-TOF-MS of  $C_{70}\text{-}T\text{-}3$  with the comparison of observed and simulated isotopic patterns of the peaks +5.

### 3.3.3 Encapsulation of $D_2\text{-}C_{76}$ with $T\text{-}3$

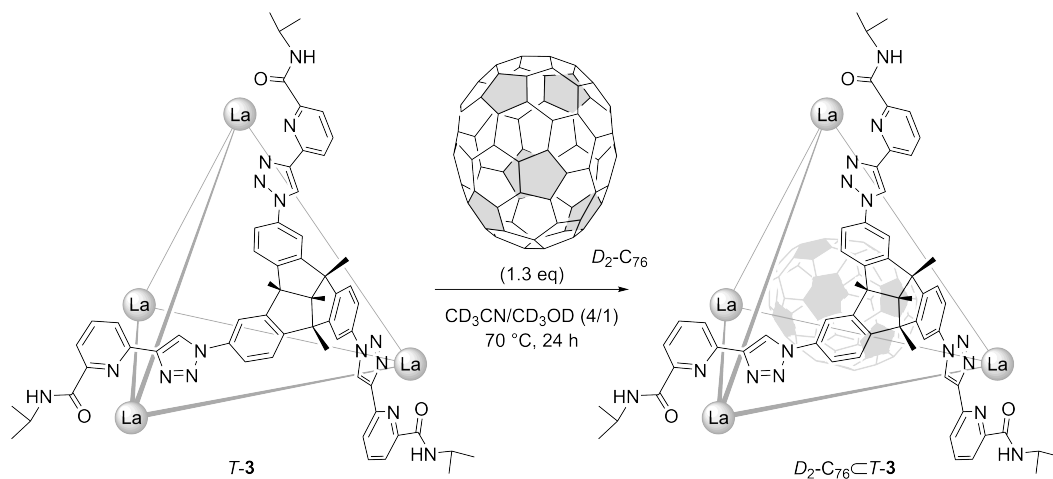

*In situ* self-assembly of  $D_2\text{-}C_{76}\text{-}T\text{-}3$ :  $\text{La}(\text{OTf})_3$  (1.3 mg, 2.2  $\mu\text{mol}$ ),  $P\text{-}1$  (2.3 mg, 2.2  $\mu\text{mol}$ ) and  $D_2\text{-}C_{76}$  (0.6 mg, 0.7  $\mu\text{mol}$ ) were mixed in a solution of  $\text{CD}_3\text{CN}/\text{CD}_3\text{OD}$  (v/v 4/1, 500  $\mu\text{L}$ ). After stirring at 70  $^\circ\text{C}$  for 24 h, the insoluble excess  $D_2\text{-}C_{76}$  was removed by centrifugation. The resulting solution was further characterized by NMR spectroscopy and high-resolution ESI-TOF-MS.  $^1\text{H}$  NMR spectrum showed the quantitative formation of  $D_2\text{-}C_{76}\text{-}T\text{-}3$  ( $\Delta_4\text{-}P_4$ ). The solvents were dried *in vacuo* to obtain a light grey powder. Yield ca. 4.0 mg, 98%.

$^1\text{H}$  NMR (400 MHz, 298 K,  $\text{CD}_3\text{CN}/\text{CD}_3\text{OD}$  v/v 4/1):  $\delta$  = 9.55 (s, 12H,  $H_{11/11}$ ), 9.54 (s, 12H,  $H_{11}$  and  $H_{11}$ ), 8.67 (d,  $J$  = 7.9 Hz, 24H,  $H_{14}$  and  $H_{14}$ ), 8.40 (t,  $J$  = 8.0 Hz, 24H,  $H_{15}$  and  $H_{15}$ ), 8.05 (d,  $J$  = 7.9 Hz, 24H,  $H_{16}$  and  $H_{16}$ ), 7.69 (s, 24H,  $H_{10}$  and  $H_{10}$ ), 7.53 (m, 24H,  $H_7$  and  $H_7$ ), 6.87 (m, 24H,  $H_8$  and  $H_8$ ), 3.90 (m, 24H,  $H_{20}$  and  $H_{20}$ ), 1.59 (s, 72H,  $H_4$  and  $H_4$ ), 1.30 (s, 24H,  $H_1$  and  $H_1$ ), 1.16 (d,  $J$  = 6.7 Hz, 72H,  $H_{22}$  and  $H_{22}$ ), 0.90 (d,  $J$  = 6.6 Hz, 72H,  $H_{21}$  and  $H_{21}$ ). The  $^{13}\text{C}$  NMR signals were too weak to be measured. High-resolution ESI-TOF-MS for  $D_2\text{-C}_{76}\text{C-T-3}$ . The following picked signals are those at the highest intensities.  $m/z$  Calcd for  $[D_2\text{-C}_{76}\text{C-T-3} - 8(\text{OTf})]^{8+}$  770.1684, found 770.1659;  $[D_2\text{-C}_{76}\text{C-T-3} - 7(\text{OTf})]^{7+}$  901.4713, found 901.4688; Calcd for  $[D_2\text{-C}_{76}\text{C-T-3} - 6(\text{OTf})]^{6+}$  1076.5419, found 1076.5390; Calcd for  $[D_2\text{-C}_{76}\text{C-T-3} - 5(\text{OTf})]^{5+}$  1321.6408, found 1321.6376; Calcd for  $[D_2\text{-C}_{76}\text{C-T-3} - 4(\text{OTf})]^{4+}$  1689.2891, found 1689.2840.

Encapsulation of  $D_2\text{-C}_{76}$  with preformed cage  $T\text{-3}$  ( $\Delta_4\text{-P}_4$ ):  $T\text{-3}$  (3.5 mg, 0.6  $\mu\text{mol}$ ) and  $D_2\text{-C}_{76}$  (0.6 mg, 0.7  $\mu\text{mol}$ ) were mixed in a solution of  $\text{CD}_3\text{CN}/\text{CD}_3\text{OD}$  (v/v 4/1, 500  $\mu\text{L}$ ). The mixture was stirred at 70  $^\circ\text{C}$  for 24 h and monitored by  $^1\text{H}$  NMR.

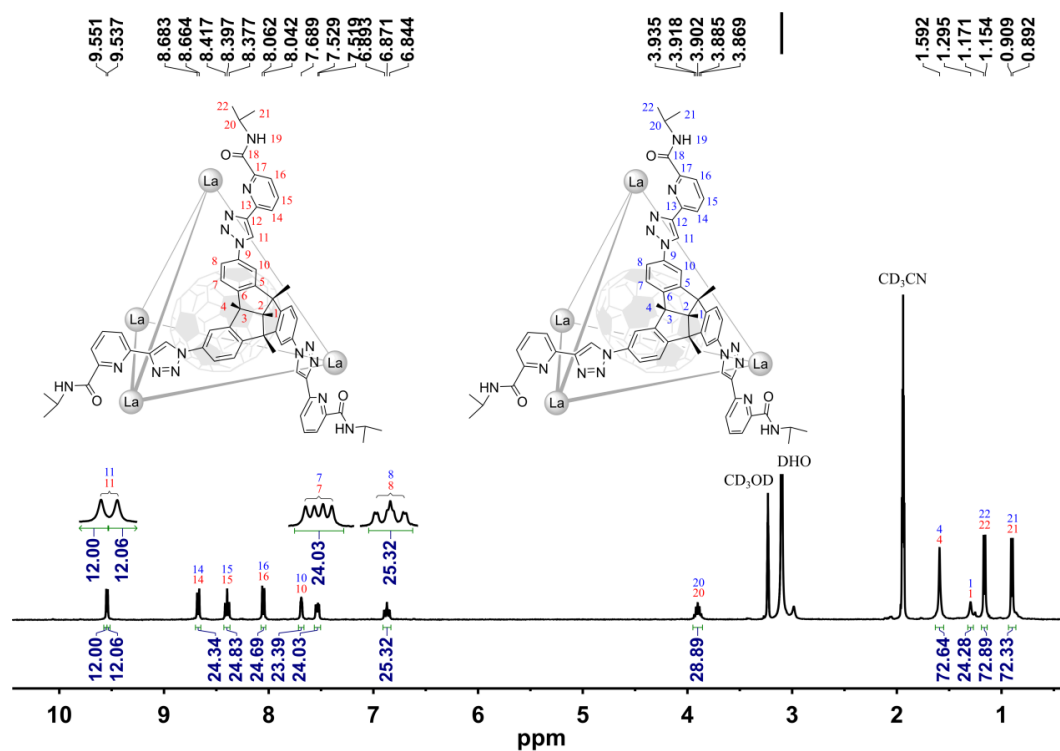

Fig. S54.  $^1\text{H}$  NMR spectrum of  $D_2\text{-C}_{76}\text{C-T-3}$  (400 MHz, 298 K,  $\text{CD}_3\text{CN}/\text{CD}_3\text{OD}$  v/v 4/1,  $[D_2\text{-C}_{76}\text{C-T-3}] = 1.1$  mM), where  $D_2\text{-C}_{76}$  is a pair of enantiomers and  $T\text{-3}$  is homochiral  $\Delta_4\text{-P}_4$ .

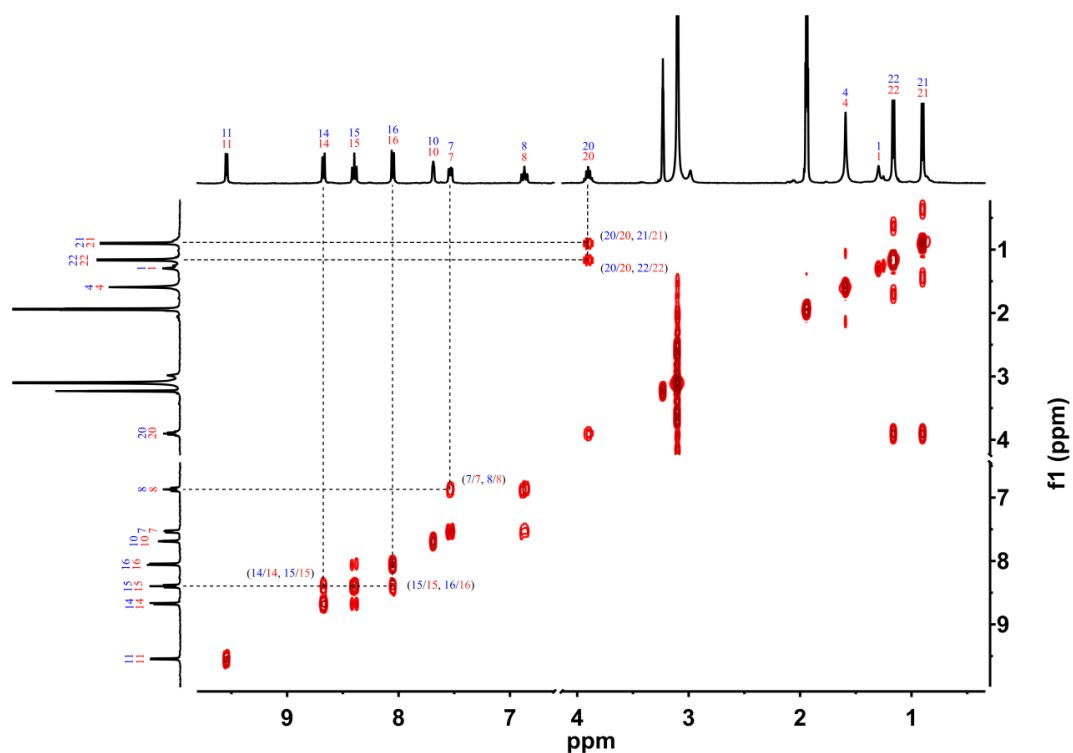

Fig. S55. Partial  $^1\text{H}$ - $^1\text{H}$  COSY spectrum of  $D_2\text{-C}_{76}\text{-}T\text{-}3$  (400 MHz, 298 K,  $\text{CD}_3\text{CN}/\text{CD}_3\text{OD}$  v/v 4/1,  $[D_2\text{-C}_{76}\text{-}T\text{-}3] = 1.1$  mM), where  $D_2\text{-C}_{76}$  is a pair of enantiomers and  $T\text{-}3$  is homochiral  $\Delta_4\text{-P}_4$ .

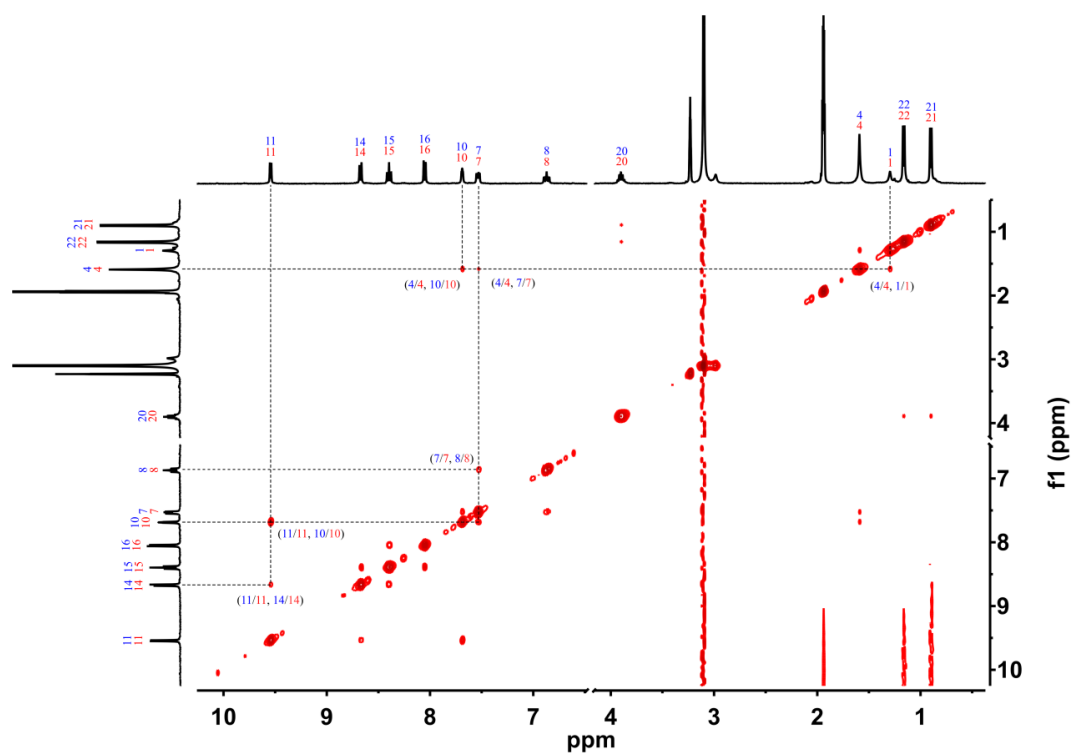

Fig. S56. Partial  $^1\text{H}$ - $^1\text{H}$  NOESY spectrum of  $D_2\text{-C}_{76}\text{-}T\text{-}3$  (400 MHz, 298 K,  $\text{CD}_3\text{CN}/\text{CD}_3\text{OD}$  v/v 4/1,  $[D_2\text{-C}_{76}\text{-}T\text{-}3] = 1.1$  mM), where  $D_2\text{-C}_{76}$  is a pair of enantiomers and  $T\text{-}3$  is homochiral  $\Delta_4\text{-P}_4$ .

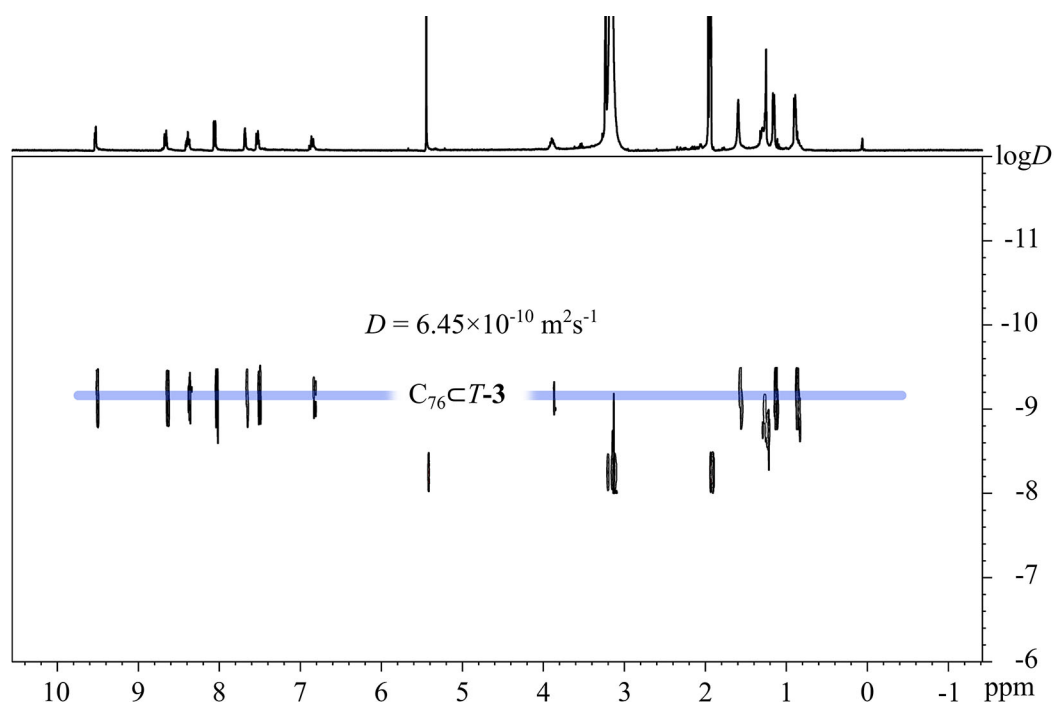

Fig. S57.  $^1\text{H}$  DOSY spectrum of  $D_2\text{-C}_{76}\text{C-T-3}$  (400 MHz, 298 K,  $\text{CD}_3\text{CN}/\text{CD}_3\text{OD}$  v/v 4/1,  $[D_2\text{-C}_{76}\text{C-T-3}] = 1.1$  mM), where  $D_2\text{-C}_{76}$  is a pair of enantiomers and  $T\text{-3}$  is homochiral  $\Delta_4\text{-P}_4$ . The hydrodynamic diameter of  $D_2\text{-C}_{76}\text{C-T-3}$  was determined to be 2.0 nm.

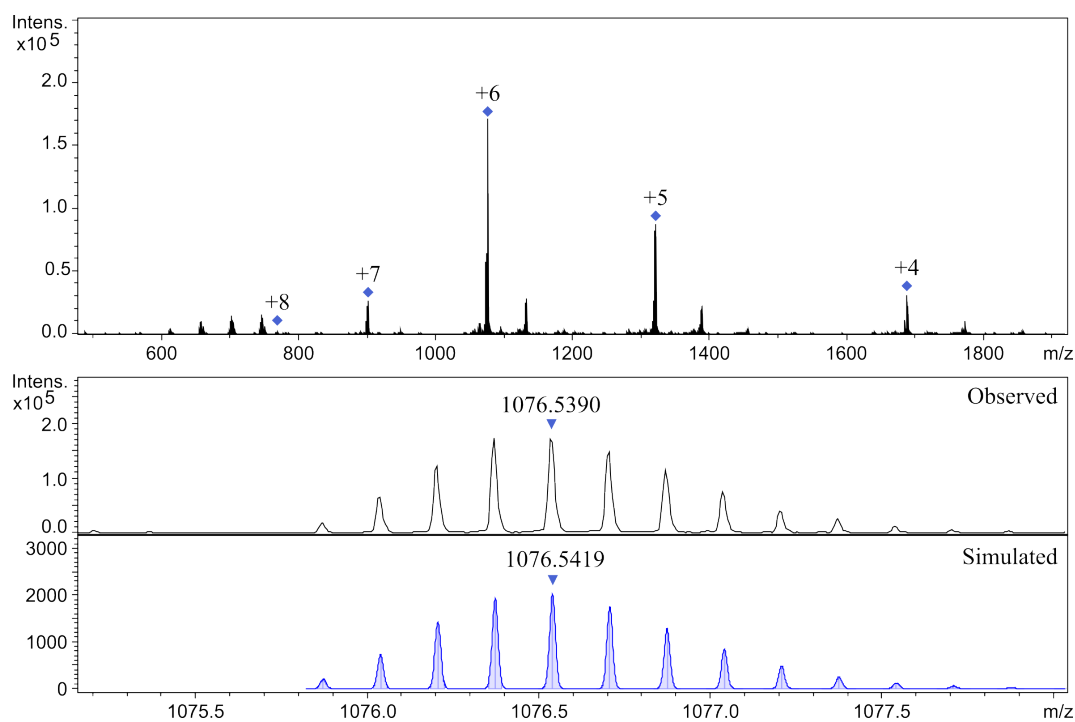

Fig. S58. High-resolution ESI-TOF-MS of  $D_2\text{-C}_{76}\text{C-T-3}$  with the comparison of observed and simulated isotopic patterns of the peaks +6.

### 3.3.4 Encapsulation of $C_{2v}$ - $C_{78}$ with $T$ -**3**

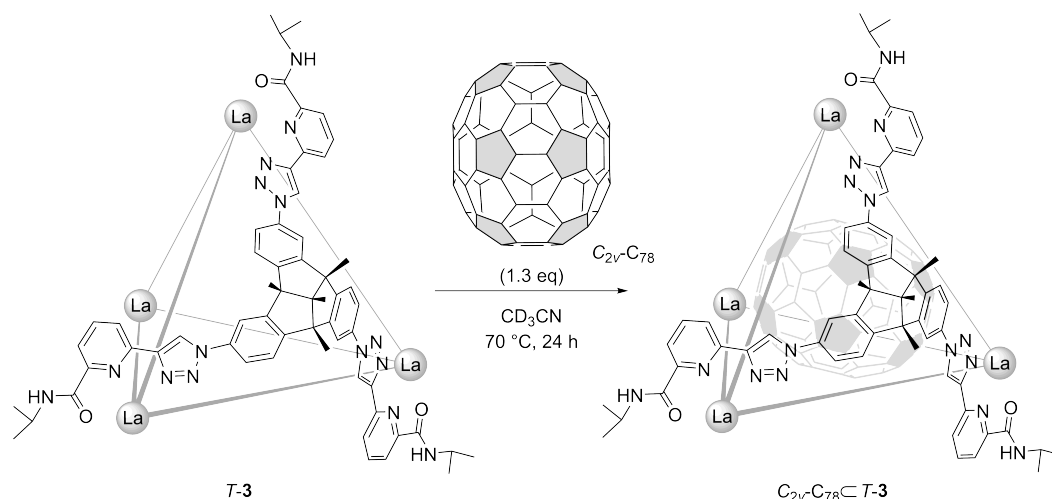

*In situ* self-assembly of  $C_{2v}$ - $C_{78}$ @ $T$ -**3**:  $\text{La}(\text{OTf})_3$  (1.3 mg, 2.2  $\mu\text{mol}$ ),  $P$ -**1** (2.3 mg, 2.2  $\mu\text{mol}$ ) and  $C_{2v}$ - $C_{78}$  (0.7 mg, 0.7  $\mu\text{mol}$ ) were mixed in a solution of  $\text{CD}_3\text{CN}$  (500  $\mu\text{L}$ ). After stirring at 70  $^\circ\text{C}$  overnight, the insoluble excess  $C_{2v}$ - $C_{78}$  was removed by centrifugation. The resulting solution was further characterized by NMR spectroscopy and high-resolution ESI-TOF-MS.  $^1\text{H}$  NMR spectrum showed the quantitative formation of  $C_{2v}$ - $C_{78}$ @ $T$ -**3** ( $\Delta_4$ - $P_4$ ). The solvents were dried *in vacuo* to obtain a light grey powder. Yield ca. 3.9 mg, 97%.

$^1\text{H}$  NMR (400 MHz, 298 K,  $\text{CD}_3\text{CN}$ ):  $\delta$  = 9.56 (s, 12H,  $H_{11}$ ), 8.77 (d,  $J$  = 8.0 Hz, 12H,  $H_{14}$ ), 8.37-8.41 (m, 24H,  $H_{19}$  and  $H_{15}$ ), 8.05 (d,  $J$  = 7.9 Hz, 12H,  $H_{16}$ ), 7.71 (s, 11H,  $H_{10}$ ), 7.67 (d,  $J$  = 8.6 Hz, 12H,  $H_7$ ), 7.07 (d,  $J$  = 8.6 Hz, 12H,  $H_8$ ), 3.97-4.00 (m, 12H,  $H_{20}$ ), 1.57 (s, 36H,  $H_4$ ), 1.30 (s, 12H,  $H_1$ ), 1.21 (d,  $J$  = 6.5 Hz, 36H,  $H_{22}$ ), 0.96 (d,  $J$  = 7.3 Hz, 36H,  $H_{21}$ ). The  $^{13}\text{C}$  NMR signals were too weak to be measured. High-resolution ESI-TOF-MS for  $C_{2v}$ - $C_{78}$ @ $T$ -**3**. The following picked signals are those at the highest intensities.  $m/z$  Calcd for  $[C_{2v}\text{-}C_{78}\text{@}T\text{-}\mathbf{3} - 7(\text{OTf})]^{7+}$  904.8999, found 904.8993;  $[C_{2v}\text{-}C_{78}\text{@}T\text{-}\mathbf{3} - 6(\text{OTf})]^{6+}$  1080.5419, found 1080.5413; Calcd for  $[C_{2v}\text{-}C_{78}\text{@}T\text{-}\mathbf{3} - 5(\text{OTf})]^{5+}$  1326.4408, found 1326.4399; Calcd for  $[C_{2v}\text{-}C_{78}\text{@}T\text{-}\mathbf{3} - 4(\text{OTf})]^{4+}$  1695.2891, found 1695.2870.

Encapsulation of  $C_{2v}$ - $C_{78}$  with preformed cage  $T$ -**3** ( $\Delta_4$ - $P_4$ ):  $T$ -**3** (3.5 mg, 0.6  $\mu\text{mol}$ ) and  $C_{2v}$ - $C_{78}$  (0.7 mg, 0.7  $\mu\text{mol}$ ) were mixed in a solution of  $\text{CD}_3\text{CN}$  (500  $\mu\text{L}$ ). The mixture was stirred at 70  $^\circ\text{C}$  for 24 h and monitored by  $^1\text{H}$  NMR.

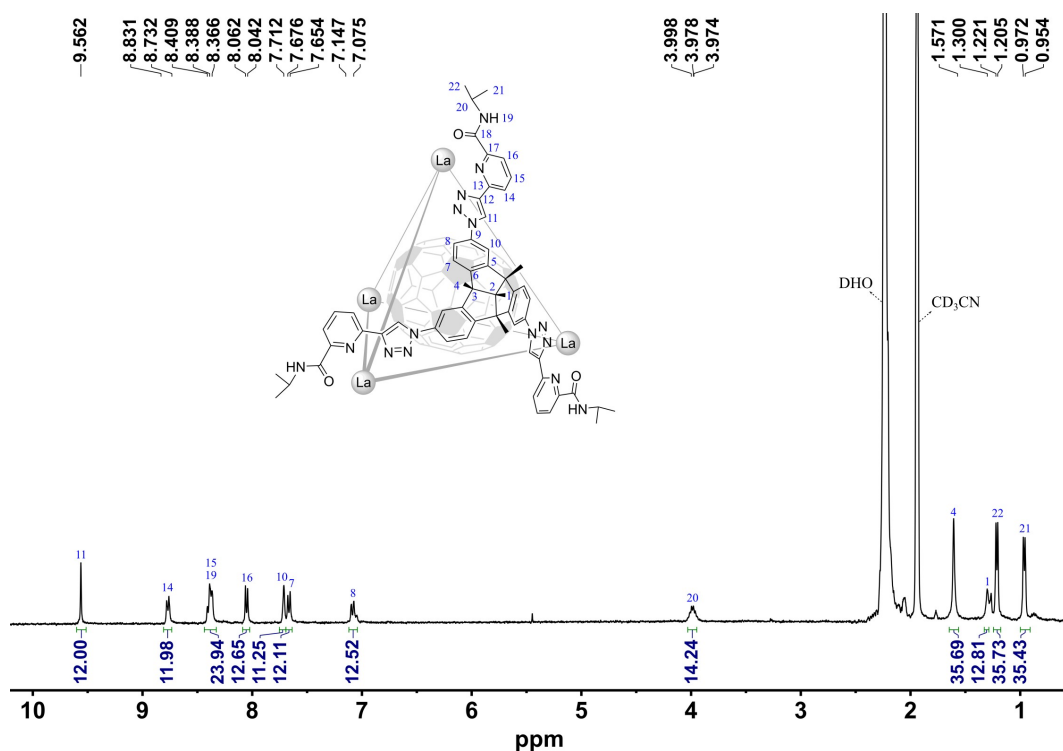

Fig. S59.  $^1\text{H}$  NMR spectrum of  $C_{2v}\text{-}C_{78}\text{C-T-3}$  (400 MHz, 298 K,  $\text{CD}_3\text{CN}$ ,  $[C_{2v}\text{-}C_{78}\text{C-T-3}] = 1.1 \text{ mM}$ ), where  $T\text{-3}$  is homochiral  $\Delta_4\text{-}P_4$ .

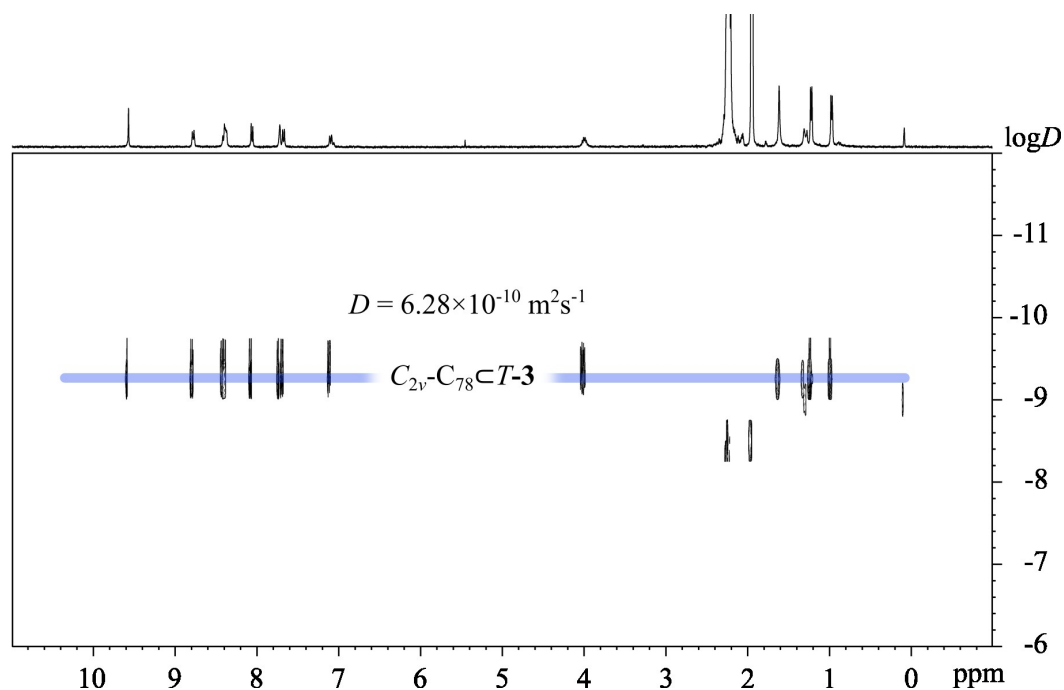

Fig. S60.  $^1\text{H}$  DOSY spectrum of  $C_{2v}\text{-}C_{78}\text{C-T-3}$  (400 MHz, 298 K,  $\text{CD}_3\text{CN}$ ,  $[C_{2v}\text{-}C_{78}\text{C-T-3}] = 1.1 \text{ mM}$ ), where  $T\text{-3}$  is homochiral  $\Delta_4\text{-}P_4$ . The hydrodynamic diameter of  $C_{2v}\text{-}C_{78}\text{C-T-3}$  was determined to be  $2.1 \text{ nm}$ .

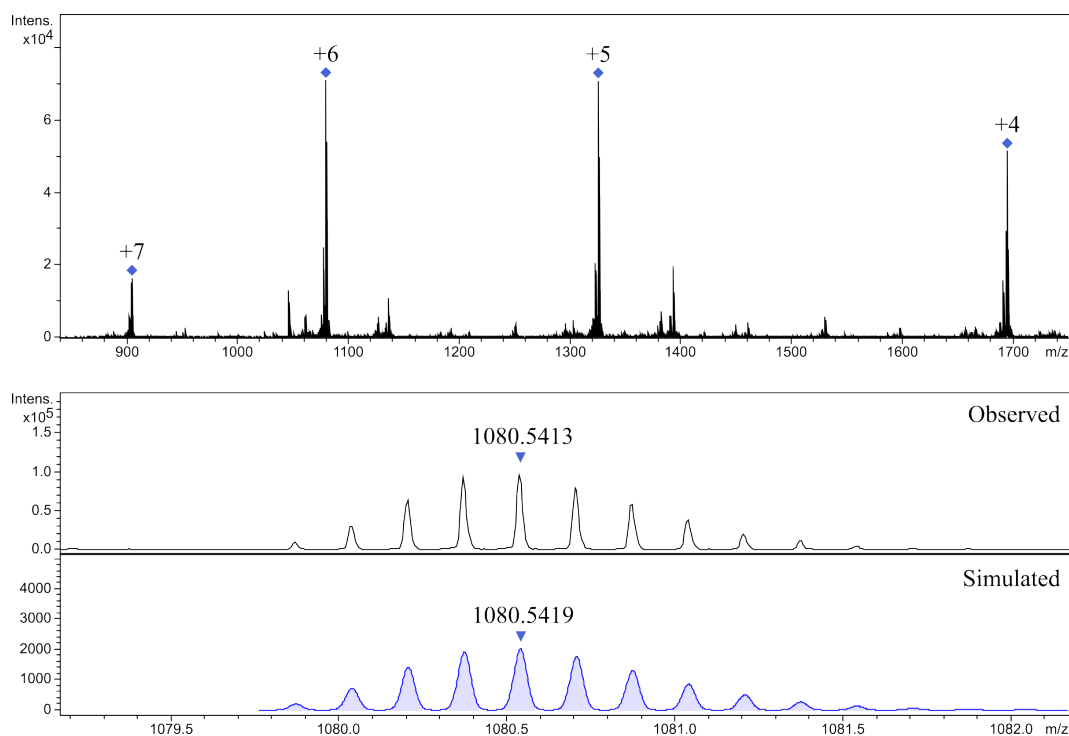

Fig. S61. High-resolution ESI-TOF-MS of  $C_{2v}$ - $C_{78}$ - $T$ -**3** with the comparison of observed and simulated isotopic patterns of the peaks +6.

### 3.3.5 Encapsulation of $C_{2v}$ '- $C_{78}$ with $T$ -**3**

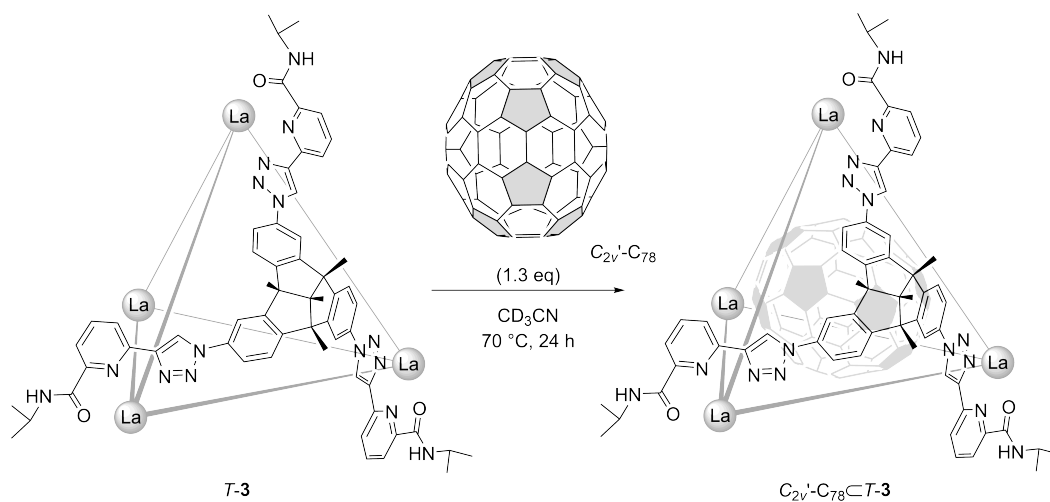

*In situ* self-assembly of  $C_{2v}$ '- $C_{78}$ - $T$ -**3**:  $\text{La}(\text{OTf})_3$  (1.3 mg, 2.2  $\mu\text{mol}$ ),  $P$ -**1** (2.3 mg, 2.2  $\mu\text{mol}$ ) and  $C_{2v}$ '- $C_{78}$  (0.7 mg, 0.7  $\mu\text{mol}$ ) were mixed in a solution of  $\text{CD}_3\text{CN}$  (500  $\mu\text{L}$ ). After stirring at 70  $^\circ\text{C}$  for 24 h, the insoluble excess  $C_{2v}$ '- $C_{78}$  was removed by centrifugation. The resulting solution was further characterized by NMR spectroscopy and high-resolution ESI-TOF-MS.  $^1\text{H}$  NMR spectrum showed the quantitative formation of  $C_{2v}$ '- $C_{78}$ - $T$ -**3** ( $\Delta_4$ - $P_4$ ). The solvents were dried *in vacuo* to obtain a light grey powder. Yield ca. 4.0 mg, 98%.

$^1\text{H}$  NMR (400 MHz, 298 K,  $\text{CD}_3\text{CN}$ ):  $\delta$  = 9.55 (s, 12H,  $H_{11}$ ), 8.75 (d,  $J$  = 7.9 Hz, 12H,  $H_{14}$ ), 8.41 – 8.36 (m, 16H,  $H_{19}$  and  $H_{15}$ ), 8.04 (d,  $J$  = 7.9 Hz, 12H,  $H_{16}$ ), 7.71 (s, 12H,  $H_{10}$ ), 7.65 (d,  $J$  = 8.6 Hz, 12H,  $H_7$ ), 7.06 (d,  $J$  = 9.3 Hz, 12H,  $H_8$ ), 4.01 – 3.93 (m, 12H,  $H_{20}$ ), 1.57 (s, 36H,  $H_4$ ), 1.30 (s, 12H,  $H_1$ ), 1.20 (d,  $J$  = 7.3 Hz, 36H,  $H_{22}$ ), 0.97 (d,  $J$  = 19.3 Hz, 36H,  $H_{21}$ ). The  $^{13}\text{C}$  NMR signals were too weak to be measured. High-resolution ESI-TOF-MS for  $\text{C}_{2v}'\text{-C}_{78}\text{-T-3}$ . The following picked signals are those at the highest intensities.  $m/z$  Calcd for  $[\text{C}_{2v}'\text{-C}_{78}\text{-T-3-7(OTf)}]^+ 904.8999$ , found 904.8992;  $[\text{C}_{2v}'\text{-C}_{78}\text{-T-3-6(OTf)}]^+ 1080.5419$ , found 1080.5409; Calcd for  $[\text{C}_{2v}'\text{-C}_{78}\text{-T-3-5(OTf)}]^+ 1326.4408$ , found 1326.4393; Calcd for  $[\text{C}_{2v}'\text{-C}_{78}\text{-T-3-4(OTf)}]^+ 1695.2891$ , found 1695.2876.

Encapsulation of  $\text{C}_{2v}'\text{-C}_{78}$  with preformed cage  $\text{T-3}$  ( $\Delta_4\text{-P}_4$ ):  $\text{T-3}$  (3.5 mg, 0.6  $\mu\text{mol}$ ) and  $\text{C}_{2v}'\text{-C}_{78}$  (0.7 mg, 0.7  $\mu\text{mol}$ ) were mixed in a solution of  $\text{CD}_3\text{CN}$  (500  $\mu\text{L}$ ). The mixture was stirred at 70  $^\circ\text{C}$  for 24 h and monitored by  $^1\text{H}$  NMR.

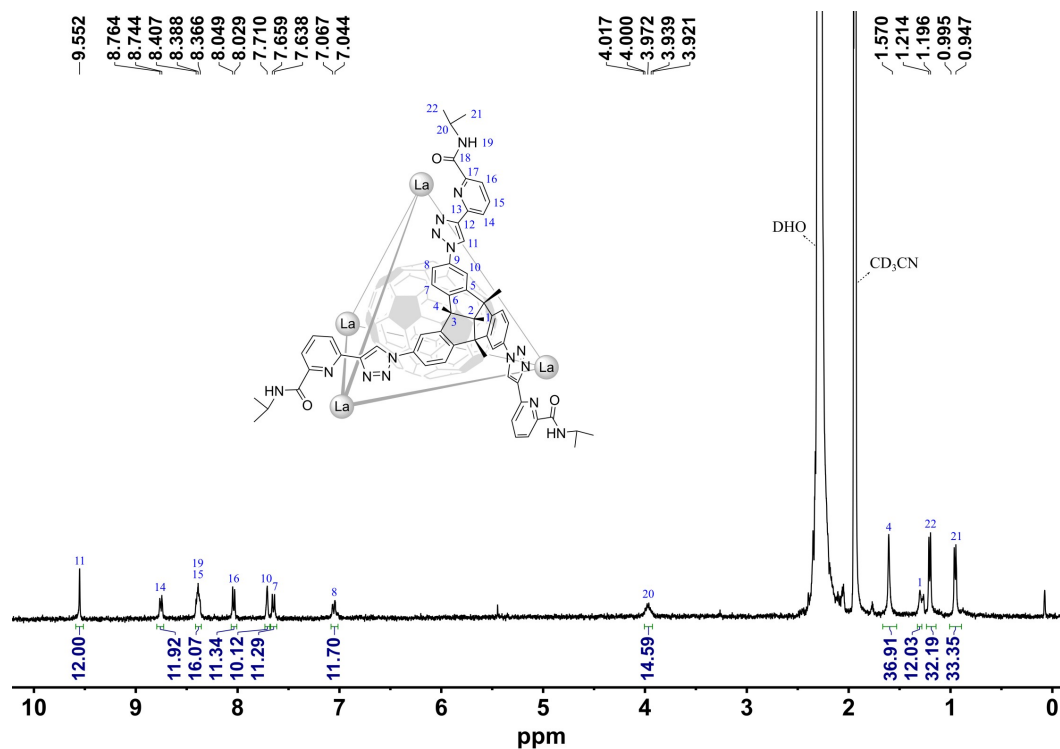

Fig. S62.  $^1\text{H}$  NMR spectrum of  $\text{C}_{2v}'\text{-C}_{78}\text{-T-3}$  (400 MHz, 298 K,  $\text{CD}_3\text{CN}$ ,  $[\text{C}_{2v}'\text{-C}_{78}\text{-T-3}] = 1.1 \text{ mM}$ ), where  $\text{T-3}$  is homochiral  $\Delta_4\text{-P}_4$ .



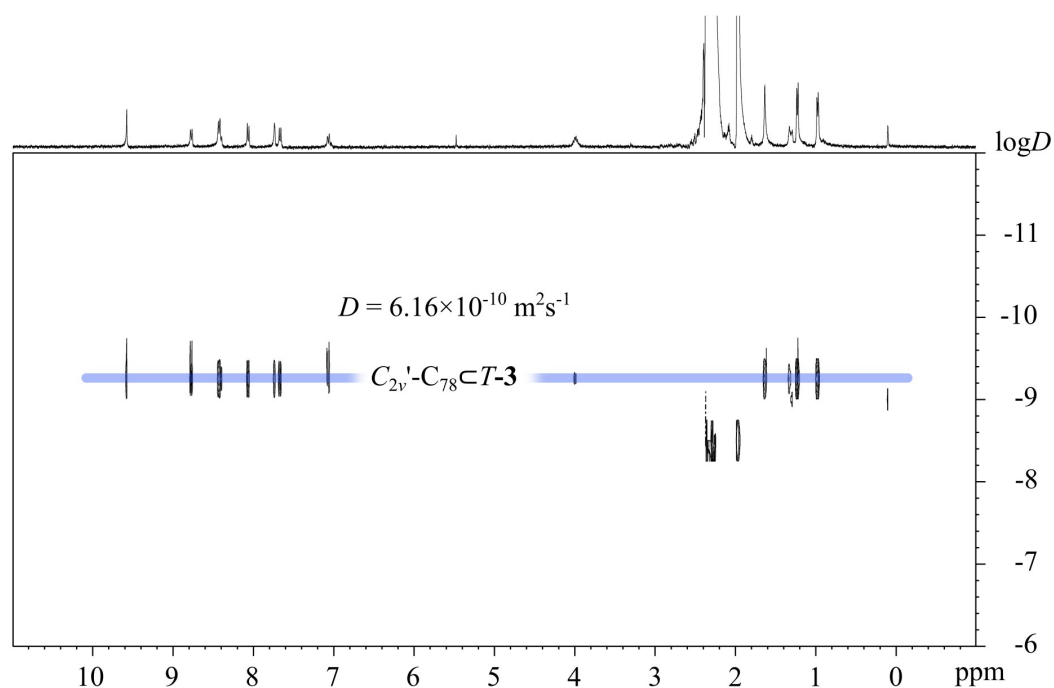

Fig. S63.  $^1\text{H}$  DOSY spectrum of  $\text{C}_{2v}'\text{-C}_{78}\text{<}T\text{-3}$  (400 MHz, 298 K,  $\text{CD}_3\text{CN}$ ,  $[\text{C}_{2v}'\text{-C}_{78}\text{<}T\text{-3}] = 1.1 \text{ mM}$ ), where  $T\text{-3}$  is homochiral  $\Delta_4\text{-P}_4$ . The hydrodynamic diameter of  $\text{C}_{2v}'\text{-C}_{78}\text{<}T\text{-3}$  was determined to be 2.1 nm.

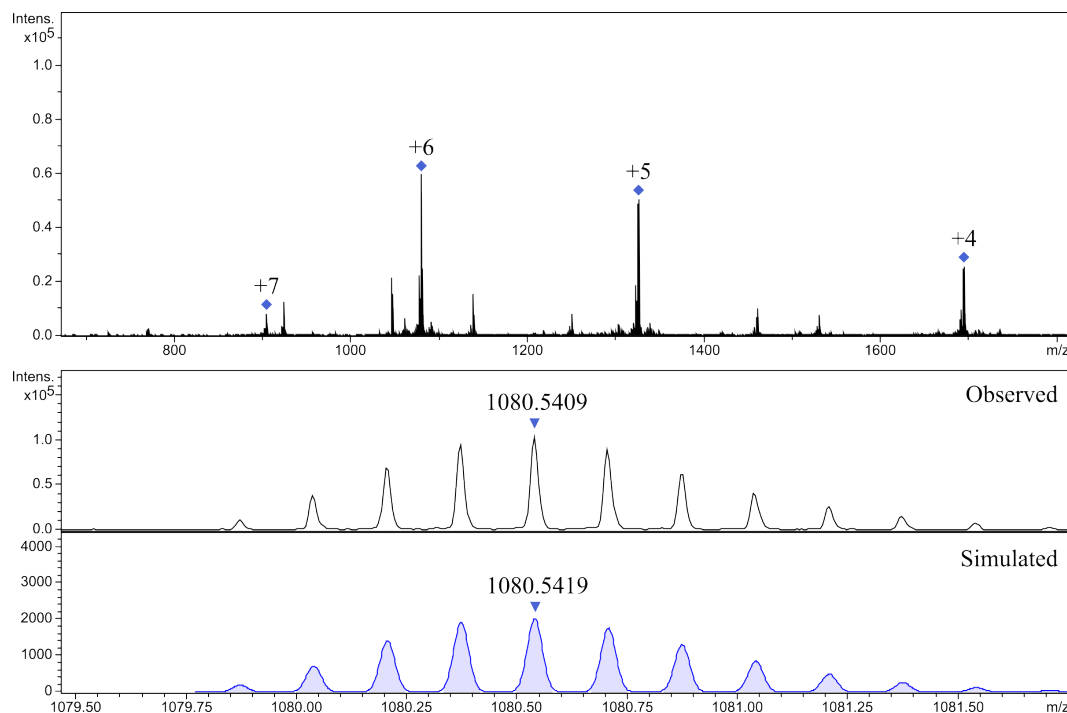

Fig. S64. High-resolution ESI-TOF-MS of  $\text{C}_{2v}'\text{-C}_{78}\text{<}T\text{-3}$  with the comparison of observed and simulated isotopic patterns of the peaks +6.

### 3.3.6 Encapsulation of C<sub>60</sub> with S<sub>4</sub>-4

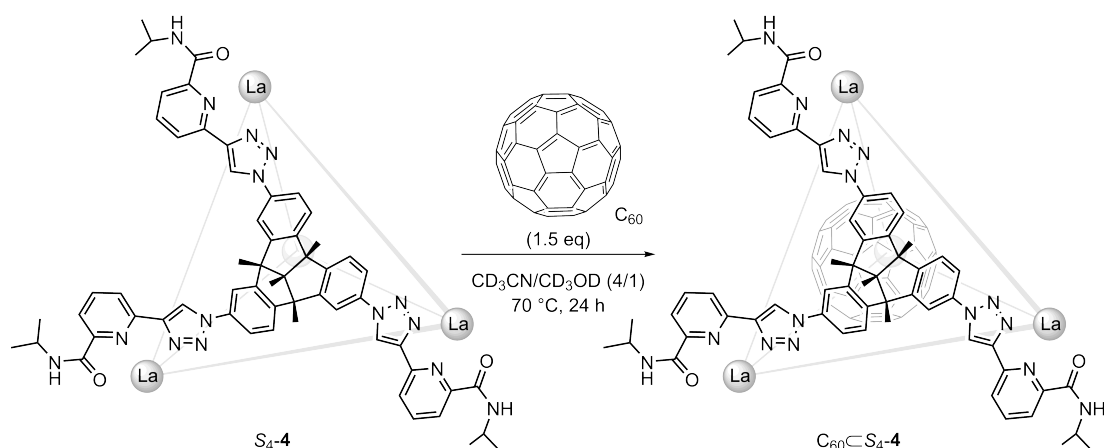

*In situ* self-assembly of C<sub>60</sub>@S<sub>4</sub>-4: La(OTf)<sub>3</sub> (6.9 mg, 11.7 μmol), C<sub>1</sub>-2 (12 mg, 11.7 μmol) and C<sub>60</sub> (3.2 mg, 4.4 μmol) were mixed in a solution of CD<sub>3</sub>CN/CD<sub>3</sub>OD (v/v 4/1, 500 μL). After stirring at 70 °C for 24 h, the insoluble excess C<sub>60</sub> was removed by centrifugation. The resulting solution was further characterized by NMR spectroscopy and high-resolution ESI-TOF-MS. <sup>1</sup>H NMR spectrum showed the quantitative formation of C<sub>60</sub>@S<sub>4</sub>-4. The solvents were dried *in vacuo* to obtain a light purple powder. Yield ca. 20.5 mg, 98%.

<sup>1</sup>H NMR (400 MHz, 298 K, CD<sub>3</sub>CN/CD<sub>3</sub>OD v/v 4/1): δ = 9.45 (s, 4H, H<sub>51</sub>), 9.36 (s, 4H, H<sub>15</sub>), 9.29 (s, 4H, H<sub>33</sub>), 8.92 (d, *J* = 8.0 Hz, 4H, H<sub>54</sub>), 8.85 (d, *J* = 8.0 Hz, 4H, H<sub>36</sub>), 8.65 (d, *J* = 7.9 Hz, 4H, H<sub>18</sub>), 8.46 (m, 8H, H<sub>55</sub> and H<sub>37</sub>), 8.32 (t, *J* = 8.0 Hz, 4H, H<sub>19</sub>), 8.09 (d, *J* = 8.0 Hz, 8H, H<sub>38</sub> and H<sub>56</sub>), 8.06 – 7.95 (m, 8H, H<sub>49</sub> and H<sub>20</sub>), 7.89 (s, 4H, H<sub>31</sub>), 7.63 – 7.54 (m, 8H, H<sub>13</sub> and H<sub>46</sub>), 7.18 (m, 8H, H<sub>10</sub> and H<sub>28</sub>), 6.88 (d, *J* = 9.8 Hz, 4H, H<sub>47</sub>), 6.43 (d, *J* = 8.4 Hz, 4H, H<sub>11</sub>), 6.12 (d, *J* = 8.4 Hz, 4H, H<sub>29</sub>), 3.90 – 3.77 (m, 12H, H<sub>24</sub>, H<sub>42</sub> and H<sub>60</sub>), 1.67 – 1.49 (m, 36H, H<sub>8</sub>, H<sub>6</sub> and H<sub>7</sub>), 1.27 (s, 12H, H<sub>1</sub>), 1.13 (m, 36H, H<sub>25</sub>, H<sub>43</sub> and H<sub>61</sub>), 0.86 (m, 36H, H<sub>26</sub>, H<sub>44</sub> and H<sub>62</sub>). <sup>13</sup>C NMR (101 MHz, 298 K, CD<sub>3</sub>CN/CD<sub>3</sub>OD v/v 4/1): δ = 167.8, 151.7, 151.2, 150.4, 149.9, 149.1, 148.5, 143.0, 141.6 (encapsulated C<sub>60</sub>), 137.0, 136.5, 126.2, 123.7, 123.3, 123.2, 122.0, 121.5, 120.5, 114.8, 114.0, 113.7, 72.1, 65.2, 63.6, 62.5, 45.0, 27.5, 26.9, 23.9, 21.6, 16.1. High-resolution ESI-TOF-MS for C<sub>60</sub>@S<sub>4</sub>-4. The following picked signals are those at the highest intensities. *m/z* Calcd for [C<sub>60</sub>@S<sub>4</sub>-4 – 6(OTf)]<sup>6+</sup> 1044.5419, found 1044.5399; Calcd for [C<sub>60</sub>@S<sub>4</sub>-4 – 5(OTf)]<sup>5+</sup> 1283.2407, found 1283.2388; Calcd for [C<sub>60</sub>@S<sub>4</sub>-4 – 4(OTf)]<sup>4+</sup> 1641.2890, found 1641.2863.

Encapsulation of C<sub>60</sub> with preformed cage S<sub>4</sub>-4 (majority): S<sub>4</sub>-4 (10 mg, 1.6 μmol) and C<sub>60</sub> (1.7 mg, 2.4 μmol) were mixed in a solution of CD<sub>3</sub>CN/CD<sub>3</sub>OD (v/v 4/1, 500 μL). The mixture was stirred at 70 °C for 24 h and monitored by <sup>1</sup>H NMR.

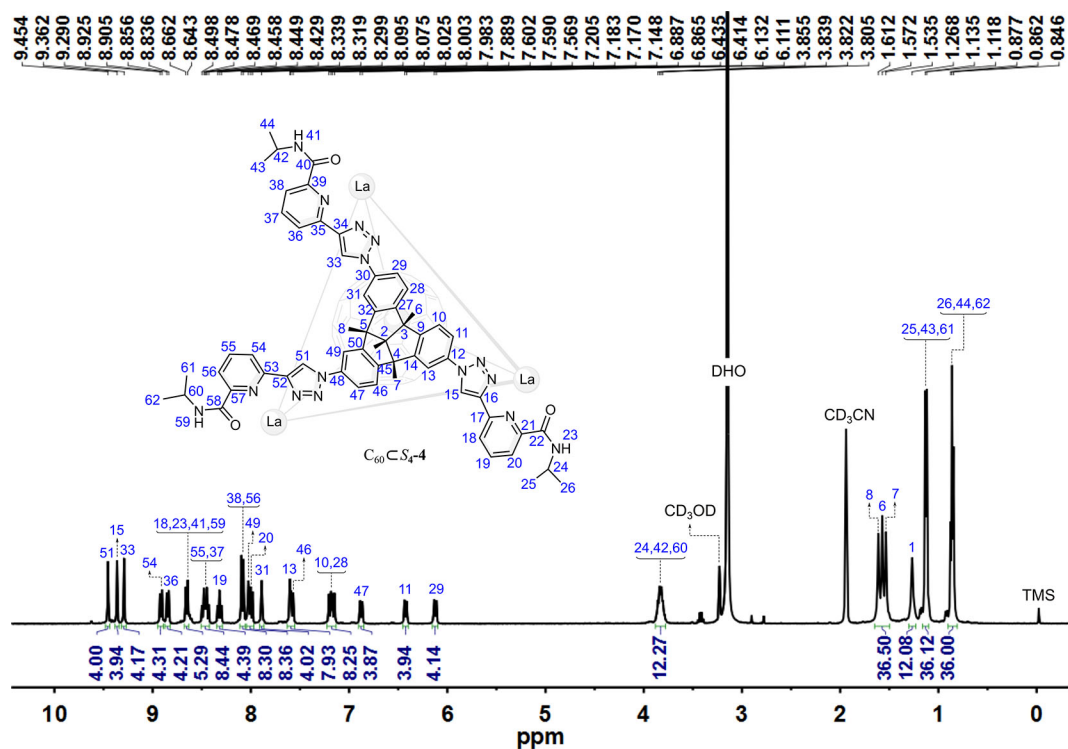

Fig. S65.  $^1\text{H}$  NMR spectrum of  $\text{C}_{60}\text{C}_4\text{-4}$  (400 MHz, 298 K,  $\text{CD}_3\text{CN}/\text{CD}_3\text{OD}$  v/v 4/1,  $[\text{C}_{60}\text{C}_4\text{-4}] = 5.9$  mM).

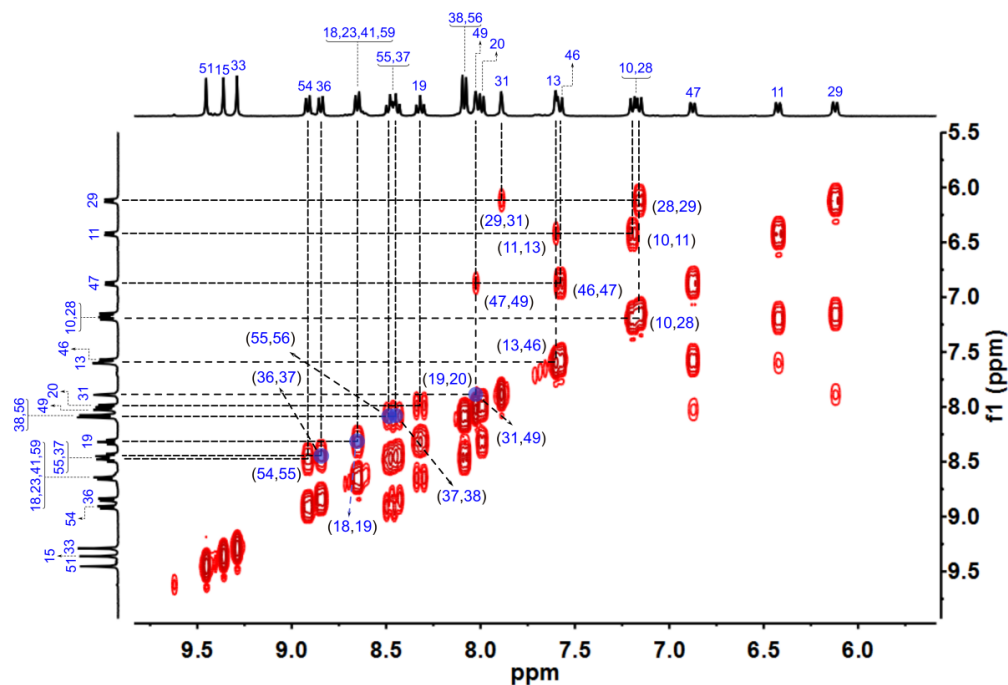

Fig. S66.  $^1\text{H}$ - $^1\text{H}$  COSY spectrum of  $\text{C}_{60}\text{C}_4\text{-4}$  (400 MHz, 298 K,  $\text{CD}_3\text{CN}/\text{CD}_3\text{OD}$  v/v 4/1,  $[\text{C}_{60}\text{C}_4\text{-4}] = 5.9$  mM).

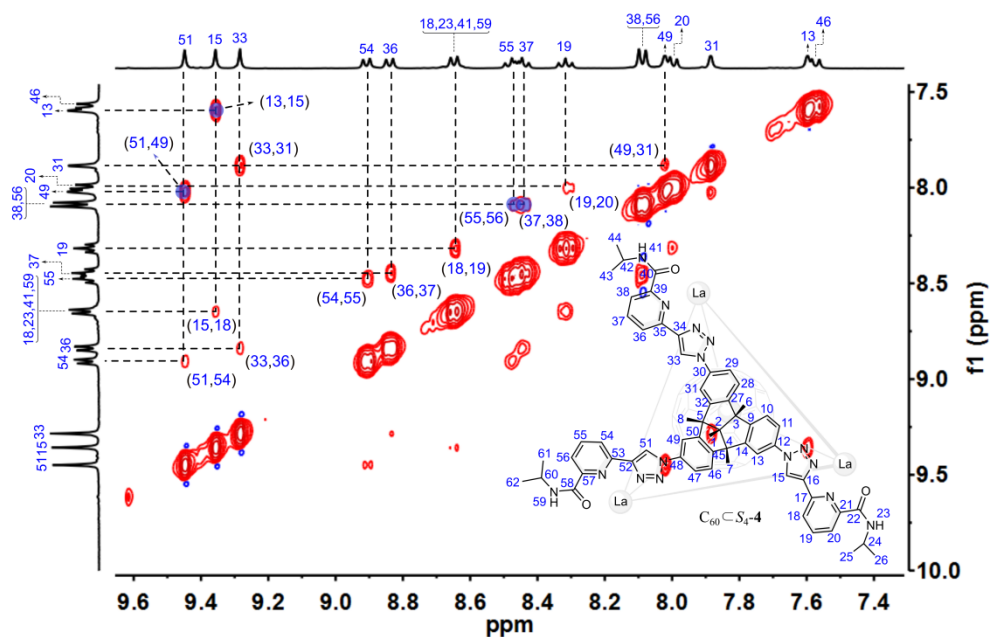

Fig. S67. Partial  $^1\text{H}$ - $^1\text{H}$  NOESY spectrum of  $\text{C}_{60}\text{CS}_4\text{-4}$  (400 MHz, 298 K,  $\text{CD}_3\text{CN}/\text{CD}_3\text{OD}$  v/v 4/1,  $[\text{C}_{60}\text{CS}_4\text{-4}] = 5.9$  mM).

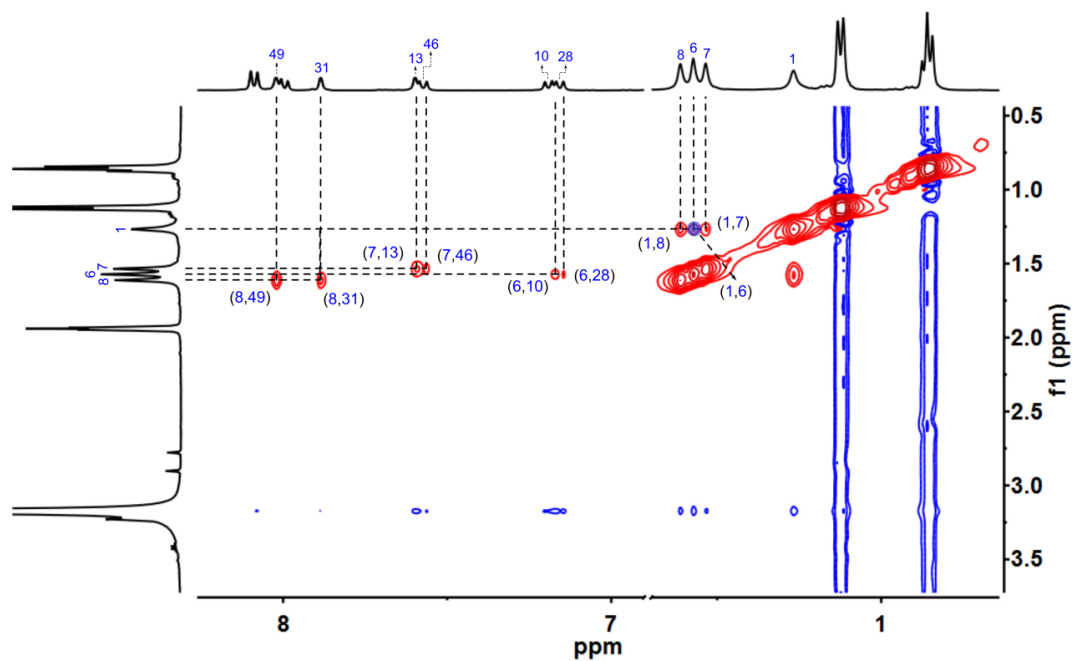

Fig. S68. Partial  $^1\text{H}$ - $^1\text{H}$  NOESY spectrum of  $\text{C}_{60}\text{CS}_4\text{-4}$  (400 MHz, 298 K,  $\text{CD}_3\text{CN}/\text{CD}_3\text{OD}$  v/v 4/1,  $[\text{C}_{60}\text{CS}_4\text{-4}] = 5.9$  mM).

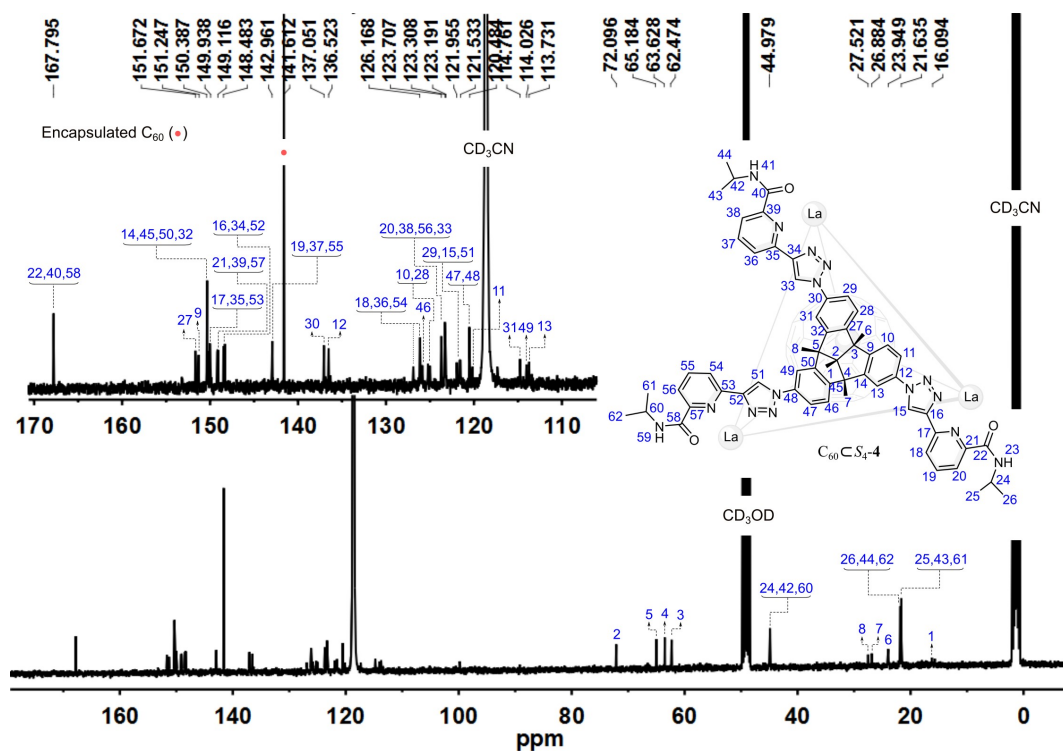

Fig. S69.  $^{13}C$  NMR spectrum of  $C_{60}C_4-4$  (400 MHz, 298 K,  $CD_3CN/CD_3OD$  v/v 4/1,  $[C_{60}C_4-4] = 5.9$  mM).

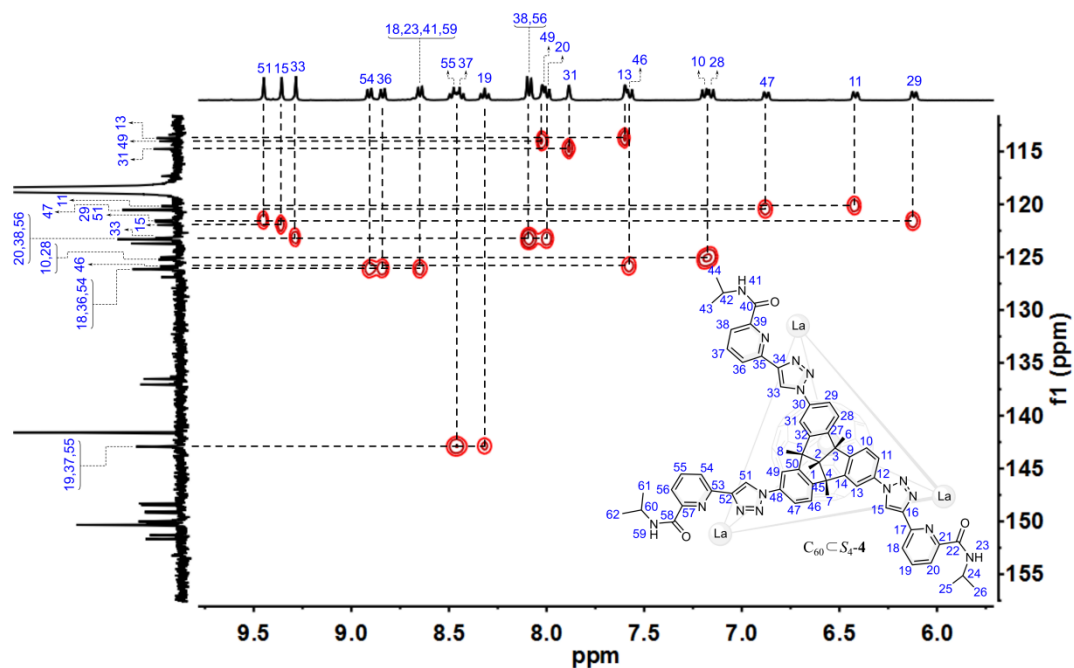

Fig. S70. Partial  $^1H$ - $^{13}C$  HSQC spectrum of  $C_{60}C_4-4$  (400 MHz, 298 K,  $CD_3CN/CD_3OD$  v/v 4/1,  $[C_{60}C_4-4] = 5.9$  mM).

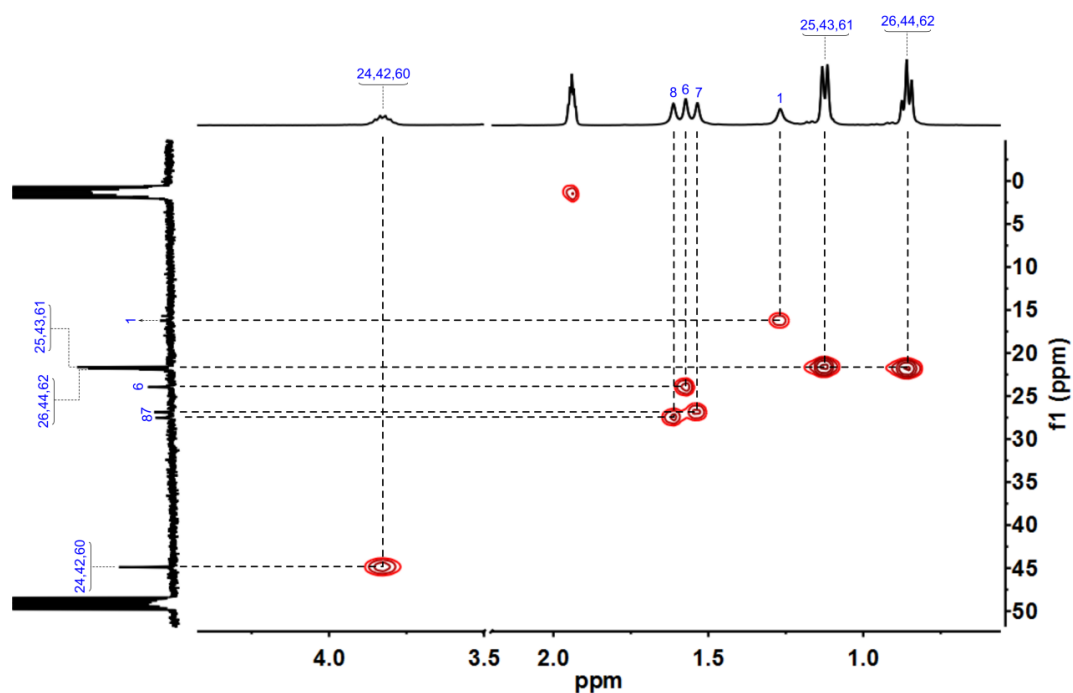

Fig. S71. Partial  $^1\text{H}$ - $^{13}\text{C}$  HSQC spectrum of  $\text{C}_{60}\text{CS}_4\text{-4}$  (400 MHz, 298 K,  $\text{CD}_3\text{CN}/\text{CD}_3\text{OD}$  v/v 4/1,  $[\text{C}_{60}\text{CS}_4\text{-4}] = 5.9$  mM).

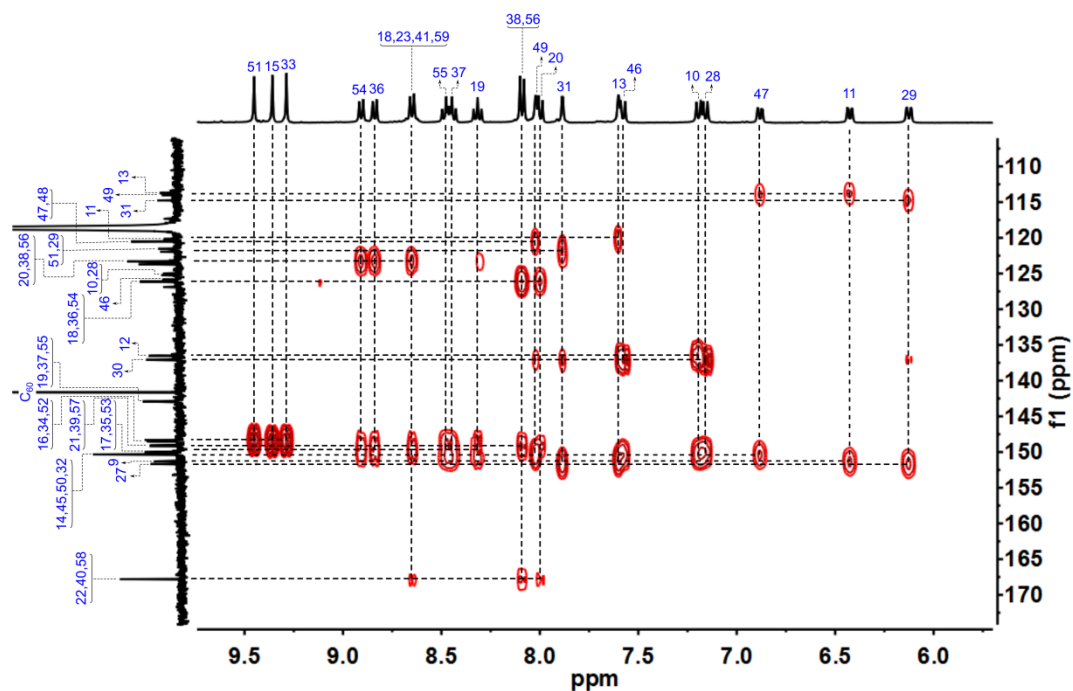

Fig. S72. Partial  $^1\text{H}$ - $^{13}\text{C}$  HMBC spectrum of  $\text{C}_{60}\text{CS}_4\text{-4}$  (400 MHz, 298 K,  $\text{CD}_3\text{CN}/\text{CD}_3\text{OD}$  v/v 4/1,  $[\text{C}_{60}\text{CS}_4\text{-4}] = 5.9$  mM).

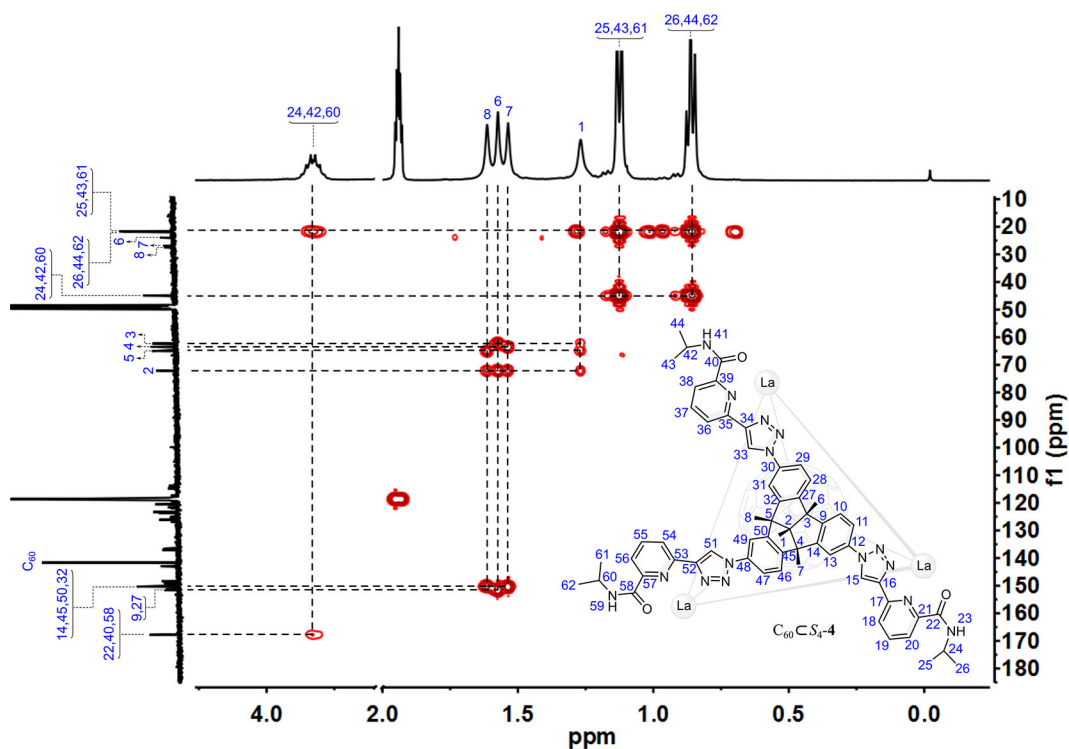

Fig. S73. Partial  $^1\text{H}$ - $^{13}\text{C}$  HMBC spectrum of  $\text{C}_{60}\text{C}_4\text{-4}$  (400 MHz, 298 K,  $\text{CD}_3\text{CN}/\text{CD}_3\text{OD}$  v/v 4/1,  $[\text{C}_{60}\text{C}_4\text{-4}] = 5.9$  mM).

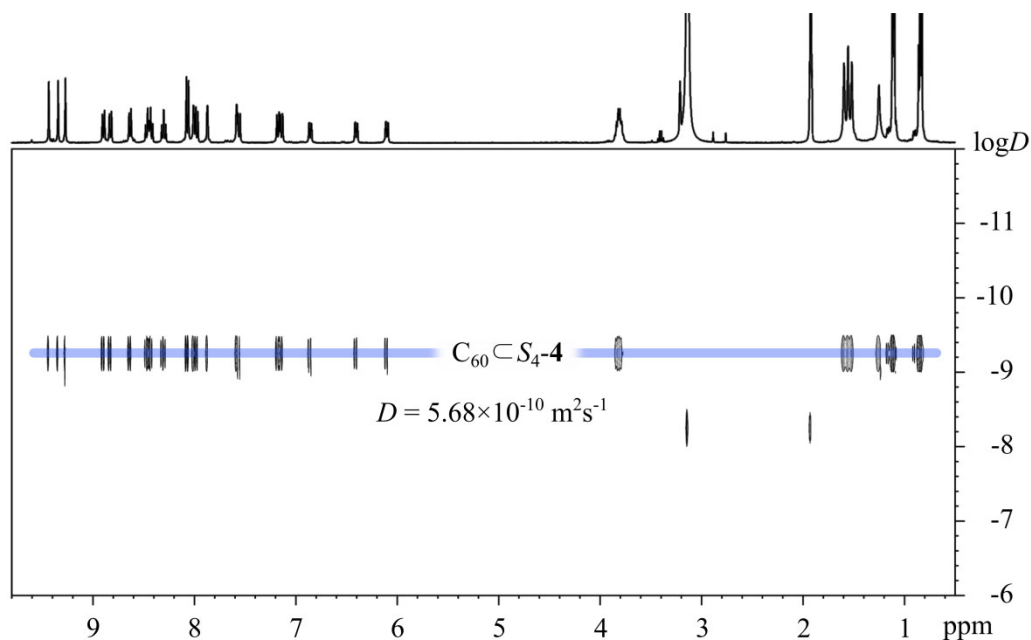

Fig. S74.  $^1\text{H}$  DOSY spectrum of  $\text{C}_{60}\text{C}_4\text{-4}$  (400 MHz, 298 K,  $\text{CD}_3\text{CN}/\text{CD}_3\text{OD}$  v/v 4/1,  $[\text{C}_{60}\text{C}_4\text{-4}] = 5.9$  mM). The hydrodynamic diameter of  $\text{C}_{60}\text{C}_4\text{-4}$  was determined to be 2.2 nm.

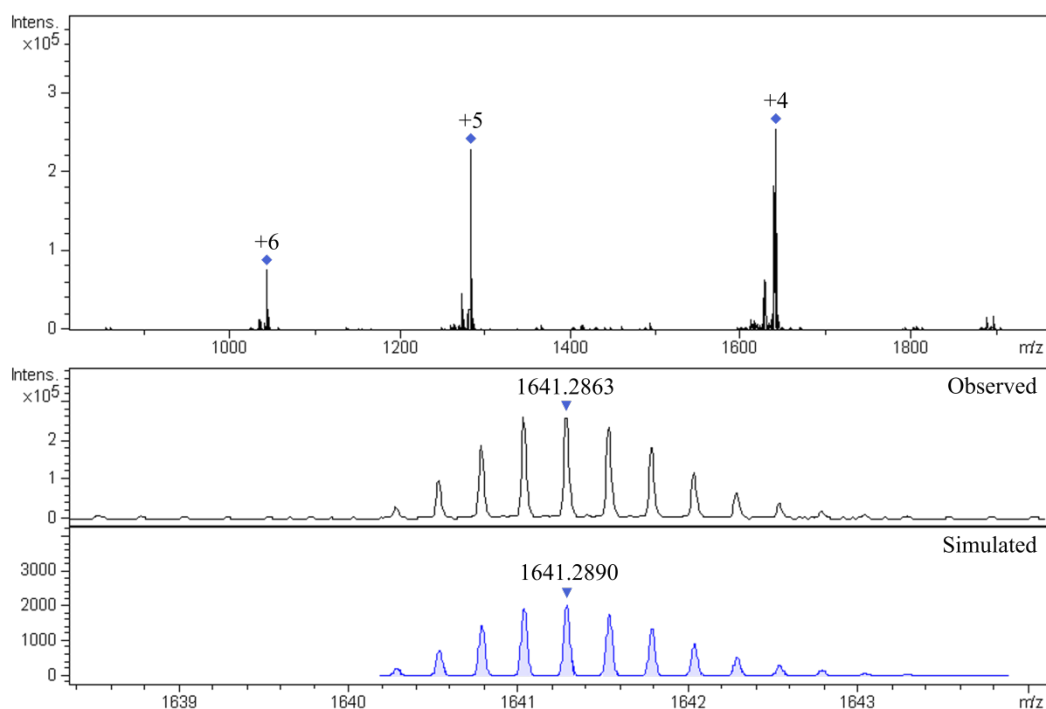

Fig. S75. High-resolution ESI-TOF-MS of  $C_{60}C_4-4$  with the comparison of observed and simulated isotopic patterns of the peaks +4.

### 3.3.7 Encapsulation of $C_{70}$ with $S_4-4$

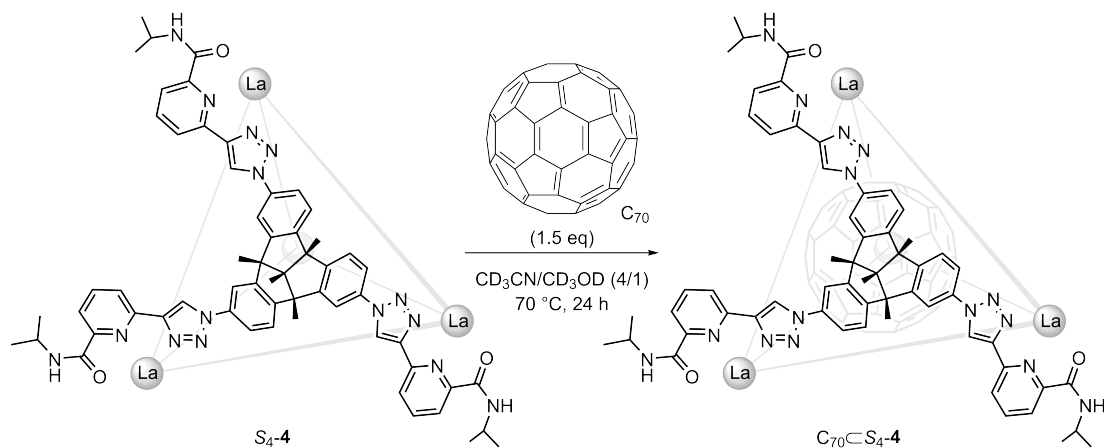

*In situ* self-assembly of  $C_{70}C_4-4$ :  $La(OTf)_3$  (6.9 mg, 11.7  $\mu$ mol),  $C_1-2$  (12 mg, 11.7  $\mu$ mol) and  $C_{70}$  (3.7 mg, 4.4  $\mu$ mol) were mixed in a solution of  $CD_3CN/CD_3OD$  (v/v 4/1, 500  $\mu$ L). After stirring at 70  $^{\circ}C$  for 24 h, the insoluble excess  $C_{70}$  was removed by centrifugation. The resulting solution was further characterized by NMR spectroscopy and high-resolution ESI-TOF-MS.  $^1H$  NMR spectrum showed the quantitative formation of  $C_{70}C_4-4$ . The solvents were dried *in vacuo* to obtain a brown powder. Yield ca. 20.3 mg, 95%.

$^1H$  NMR (400 MHz, 298 K,  $CD_3CN/CD_3OD$  v/v 4/1):  $\delta$  = 9.43 (s, 4H,  $H_{51}$ ), 9.33 (s, 4H,  $H_{33}$ ), 9.26 (s, 4H,  $H_{15}$ ), 8.96 (d,  $J$  = 7.9 Hz, 4H,  $H_{54}$ ), 8.88 (d,  $J$  = 7.9 Hz, 4H,  $H_{36}$ ),



8.62 (d,  $J = 7.9$  Hz, 4H,  $H_{18}$ ), 8.48 (dt,  $J = 22.2, 8.0$  Hz, 8H,  $H_{55}$  and  $H_{37}$ ), 8.34 (t,  $J = 7.9$  Hz, 4H,  $H_{19}$ ), 8.09 (m, 12H,  $H_{38}$ ,  $H_{56}$  and  $H_{49}$ ), 8.00 (m, 8H,  $H_{31}$  and  $H_{20}$ ), 7.44 (m, 8H,  $H_{13}$  and  $H_{46}$ ), 7.16 (m, 8H,  $H_{28}$  and  $H_{10}$ ), 6.67 (dd,  $J = 8.6, 1.6$  Hz, 4H,  $H_{47}$ ), 6.37 (dd,  $J = 8.6, 1.5$  Hz, 4H,  $H_{11}$ ), 6.16 (dd,  $J = 8.5, 1.6$  Hz, 4H,  $H_{29}$ ), 3.86 – 3.74 (m, 12H,  $H_{24}$ ,  $H_{42}$  and  $H_{60}$ ), 1.61 (m, 24H,  $H_8$  and  $H_6$ ), 1.53 (s, 12H,  $H_7$ ), 1.27 (s, 12H,  $H_I$ ), 1.18 – 1.07 (m, 36H,  $H_{25}$ ,  $H_{43}$  and  $H_{61}$ ), 0.85 (m, 36H,  $H_{26}$ ,  $H_{44}$  and  $H_{62}$ ).  $^{13}\text{C}$  NMR (101 MHz, 298 K,  $\text{CD}_3\text{CN}/\text{CD}_3\text{OD}$  v/v 4/1):  $\delta = 167.76, 152.05, 151.54, 150.51, 150.42, 150.33, 149.99, 149.66, 149.20$  (encapsulated  $\text{C}_{70}$ ), 148.59, 148.50, 146.68 (encapsulated  $\text{C}_{70}$ ), 145.93 (encapsulated  $\text{C}_{70}$ ), 143.99 (encapsulated  $\text{C}_{70}$ ), 137.49, 136.67, 129.51 (encapsulated  $\text{C}_{70}$ ), 126.94, 126.26, 125.75, 125.32, 124.97, 123.75, 123.36, 122.04, 121.89, 120.97, 120.57, 120.41, 115.80, 115.04, 114.05, 72.35, 65.29, 63.53, 62.31, 44.94, 28.27, 26.75, 21.98, 21.93, 21.91, 21.73, 21.69, 15.97. High-resolution ESI-TOF-MS for  $\text{C}_{70}\text{C}_4\text{-4}$ . The following picked signals are those at the highest intensities.  $m/z$  Calcd for  $[\text{C}_{70}\text{C}_4\text{-4} - 6(\text{OTf})]^{6+}$  1064.5419, found 1064.5422; Calcd for  $[\text{C}_{70}\text{C}_4\text{-4} - 5(\text{OTf})]^{5+}$  1307.2408, found 1307.2414; Calcd for  $[\text{C}_{70}\text{C}_4\text{-4} - 4(\text{OTf})]^{4+}$  1671.2891, found 1671.2897.

Encapsulation of  $\text{C}_{70}$  with preformed cage  $\text{S}_4\text{-4}$  (majority):  $\text{S}_4\text{-4}$  (10 mg, 1.6  $\mu\text{mol}$ ) and  $\text{C}_{70}$  (2.0 mg, 2.4  $\mu\text{mol}$ ) were mixed in a solution of  $\text{CD}_3\text{CN}/\text{CD}_3\text{OD}$  (v/v 4/1, 500  $\mu\text{L}$ ). The mixture was stirred at 70  $^\circ\text{C}$  for 24 h and monitored by  $^1\text{H}$  NMR.

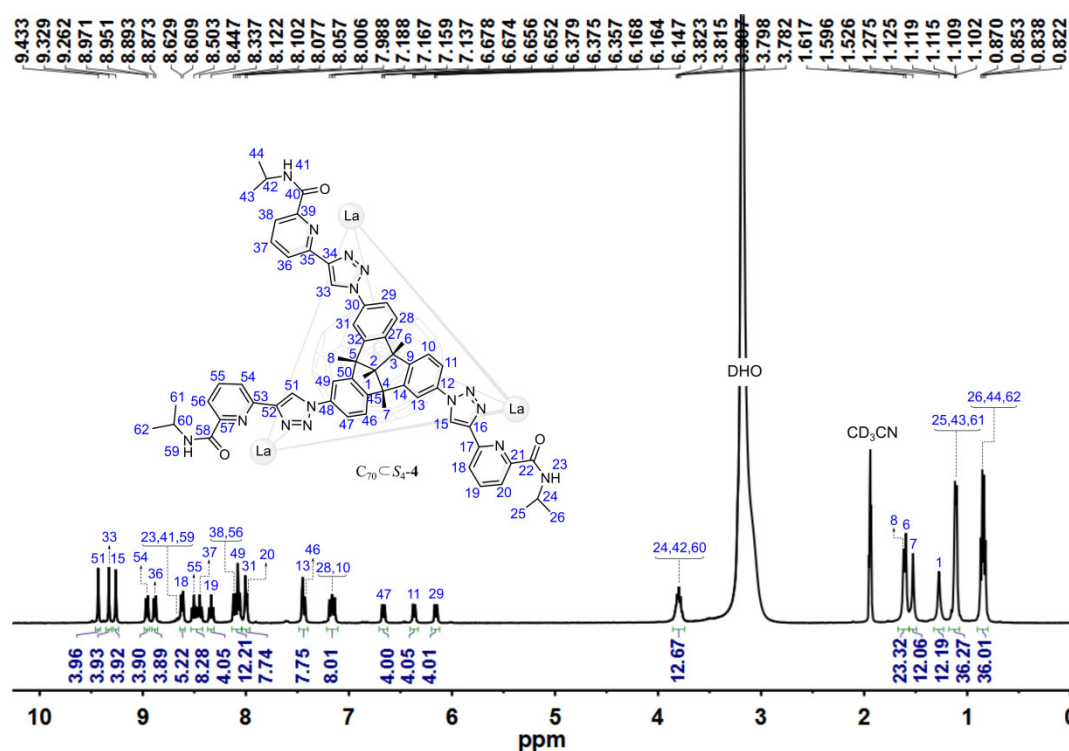

Fig. S76.  $^1\text{H}$  NMR spectrum of  $\text{C}_{70}\text{C}_4\text{-4}$  (400 MHz, 298 K,  $\text{CD}_3\text{CN}/\text{CD}_3\text{OD}$  v/v 4/1,  $[\text{C}_{70}\text{C}_4\text{-4}] = 5.9$  mM).

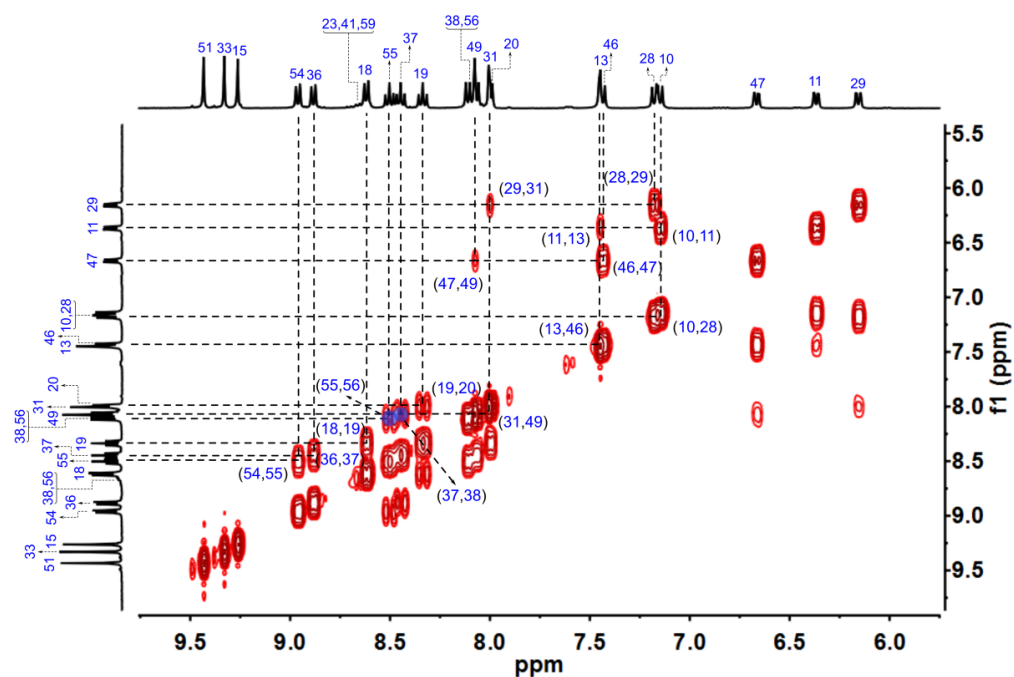

Fig. S77.  $^1\text{H}$ - $^1\text{H}$  COSY spectrum of  $\text{C}_{70}\text{CS}_4\text{-4}$  (400 MHz, 298 K,  $\text{CD}_3\text{CN}/\text{CD}_3\text{OD}$  v/v 4/1,  $[\text{C}_{70}\text{CS}_4\text{-4}] = 5.9$  mM).

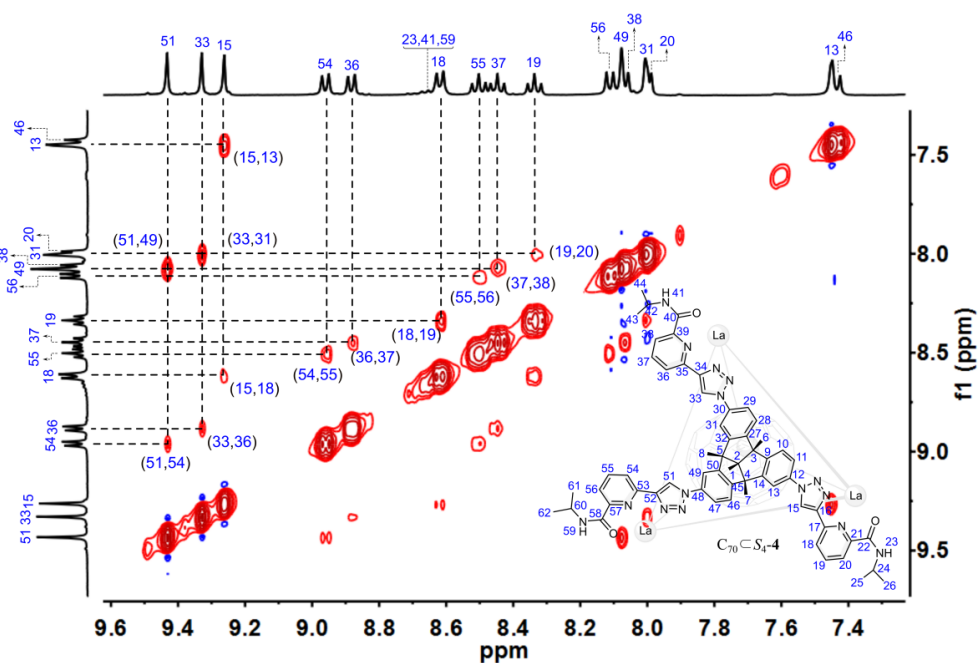

Fig. S78. Partial  $^1\text{H}$ - $^1\text{H}$  NOESY spectrum of  $\text{C}_{70}\text{CS}_4\text{-4}$  (400 MHz, 298 K,  $\text{CD}_3\text{CN}/\text{CD}_3\text{OD}$  v/v 4/1,  $[\text{C}_{70}\text{CS}_4\text{-4}] = 5.9$  mM).

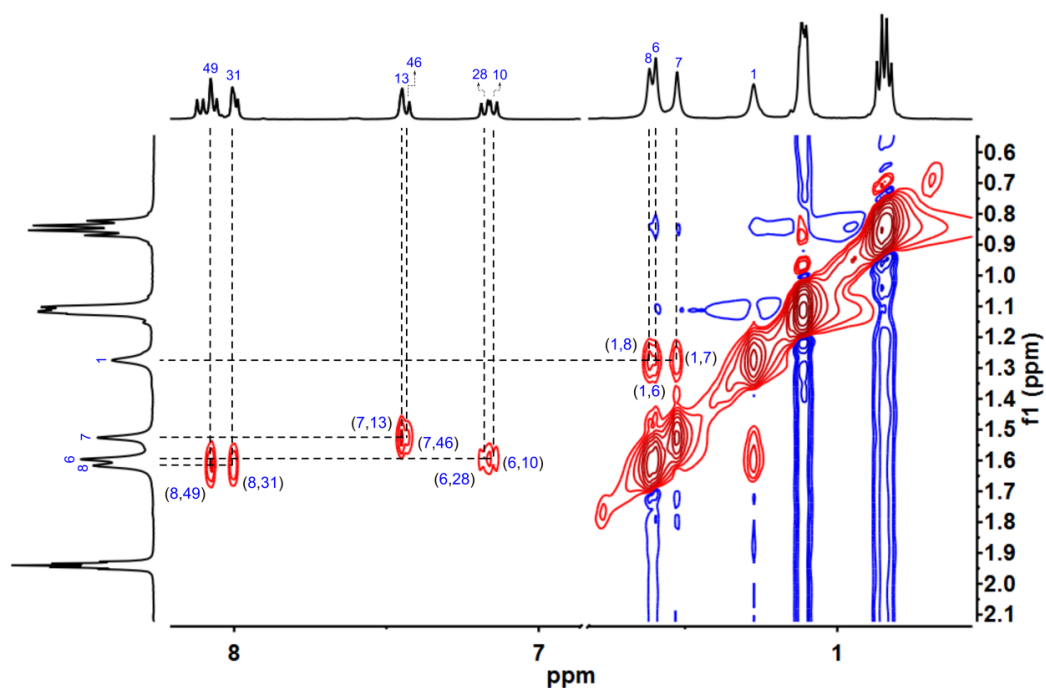

Fig. S79. Partial  $^1\text{H}$ - $^1\text{H}$  NOESY spectrum of  $\text{C}_{70}\text{C-S}_4\text{-4}$  (400 MHz, 298 K,  $\text{CD}_3\text{CN}/\text{CD}_3\text{OD}$  v/v 4/1,  $[\text{C}_{70}\text{C-S}_4\text{-4}] = 5.9$  mM).

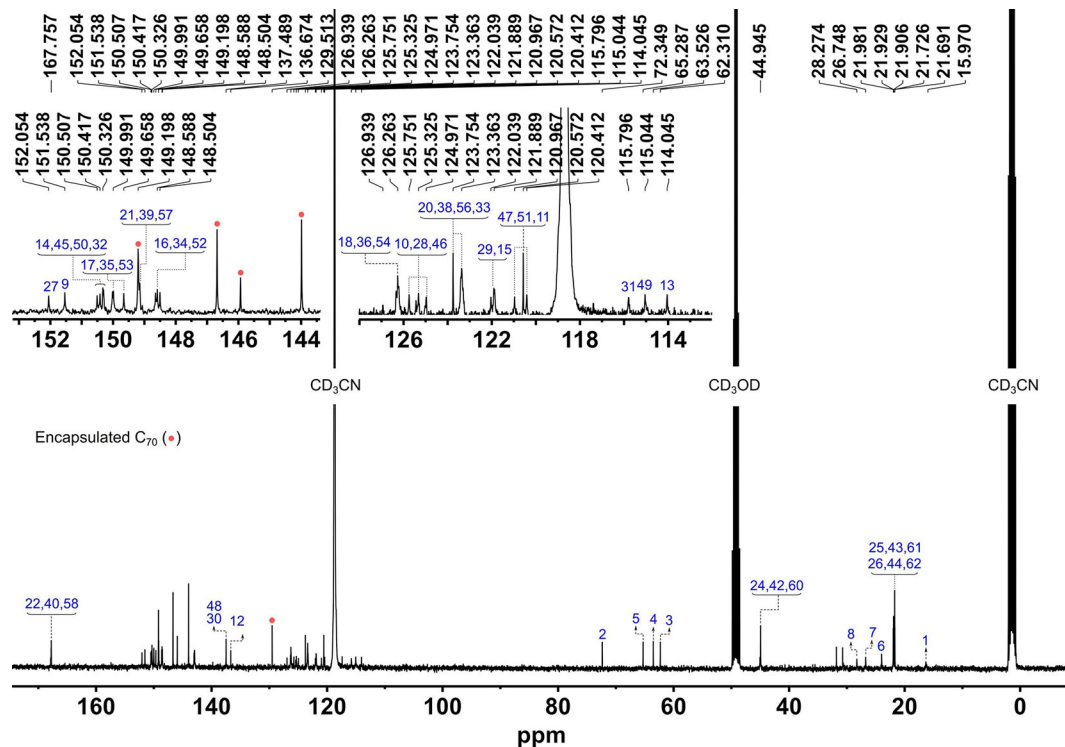

Fig. S80.  $^{13}\text{C}$  NMR spectrum of  $\text{C}_{70}\text{C-S}_4\text{-4}$  (400 MHz, 298 K,  $\text{CD}_3\text{CN}/\text{CD}_3\text{OD}$  v/v 4/1,  $[\text{C}_{70}\text{C-S}_4\text{-4}] = 5.9$  mM).

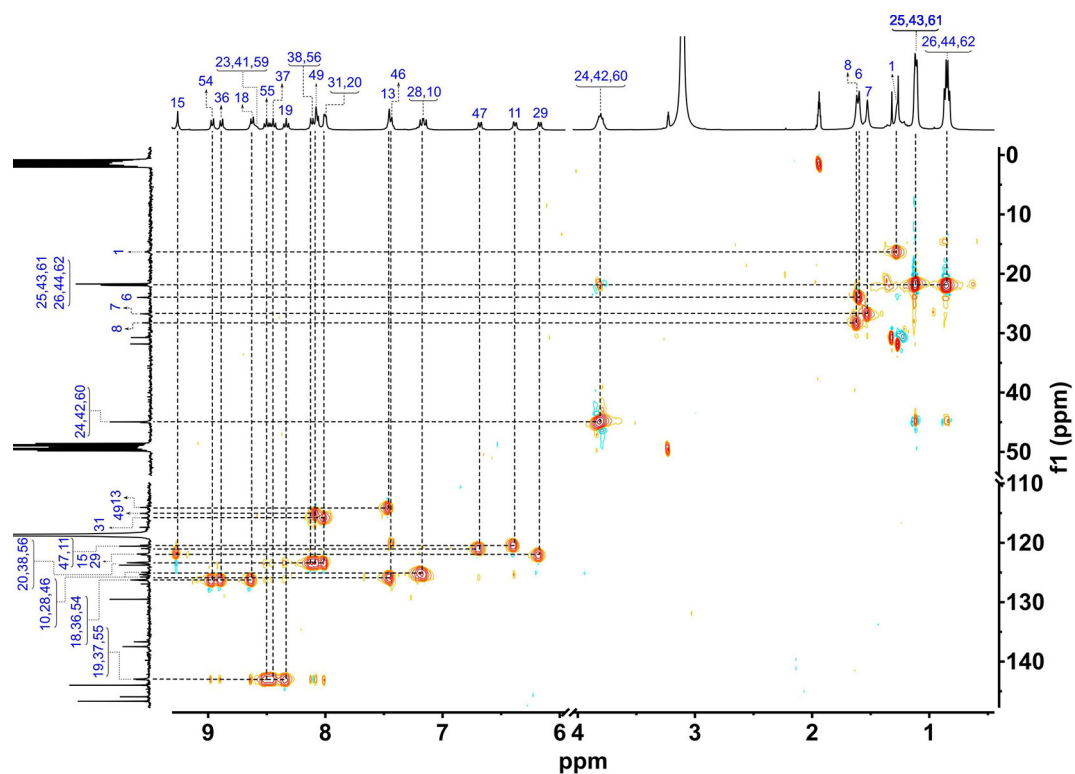

Fig. S81. Partial  $^1\text{H}$ - $^{13}\text{C}$  HSQC spectrum of  $\text{C}_{70}\text{CS}_4\text{-4}$  (400 MHz, 298 K,  $\text{CD}_3\text{CN}/\text{CD}_3\text{OD}$  v/v 4/1,  $[\text{C}_{70}\text{CS}_4\text{-4}] = 5.9$  mM).

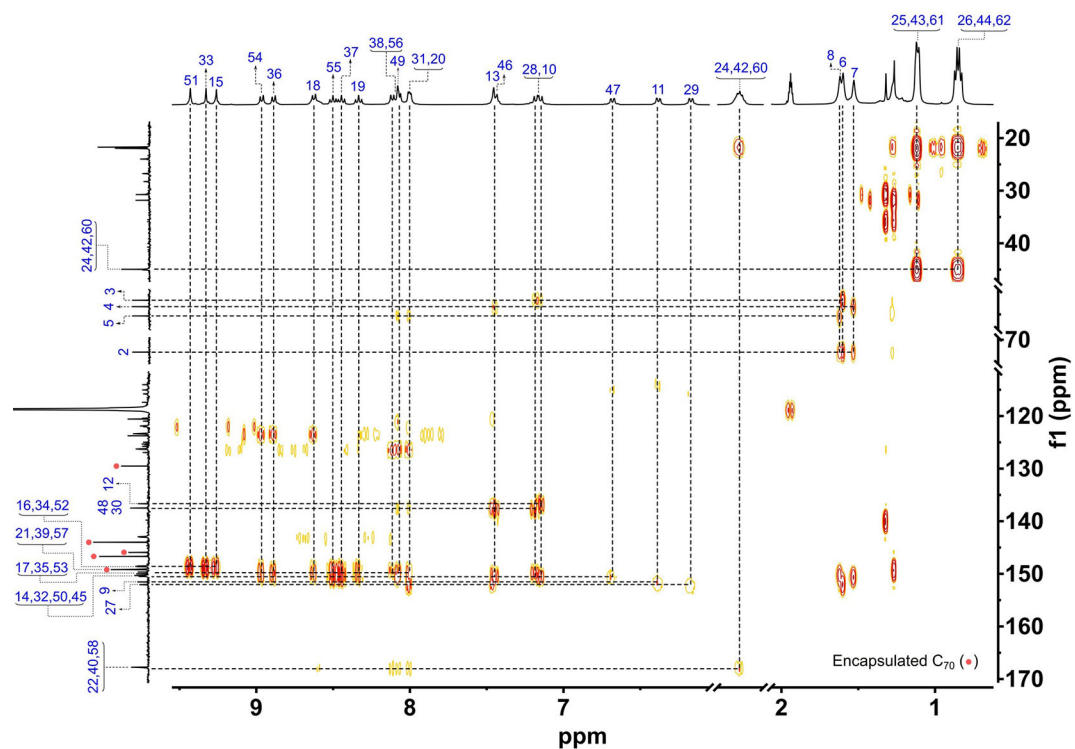

Fig. S82. Partial  $^1\text{H}$ - $^{13}\text{C}$  HMBC spectrum of  $\text{C}_{70}\text{CS}_4\text{-4}$  (400 MHz, 298 K,  $\text{CD}_3\text{CN}/\text{CD}_3\text{OD}$  v/v 4/1,  $[\text{C}_{70}\text{CS}_4\text{-4}] = 5.9$  mM).

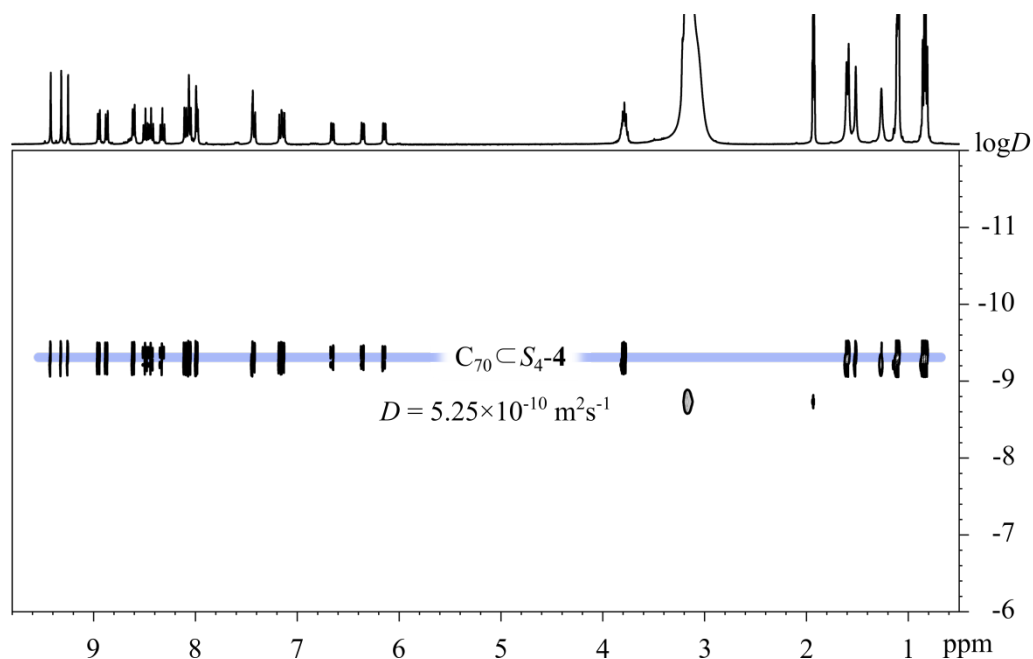

Fig. S83.  $^1\text{H}$  DOSY spectrum of  $\text{C}_{70}\text{C}_4\text{-4}$  (400 MHz, 298 K,  $\text{CD}_3\text{CN}/\text{CD}_3\text{OD}$  v/v 4/1,  $[\text{C}_{70}\text{C}_4\text{-4}] = 5.9$  mM). The hydrodynamic diameter of  $\text{C}_{70}\text{C}_4\text{-4}$  was determined to be 2.4 nm.

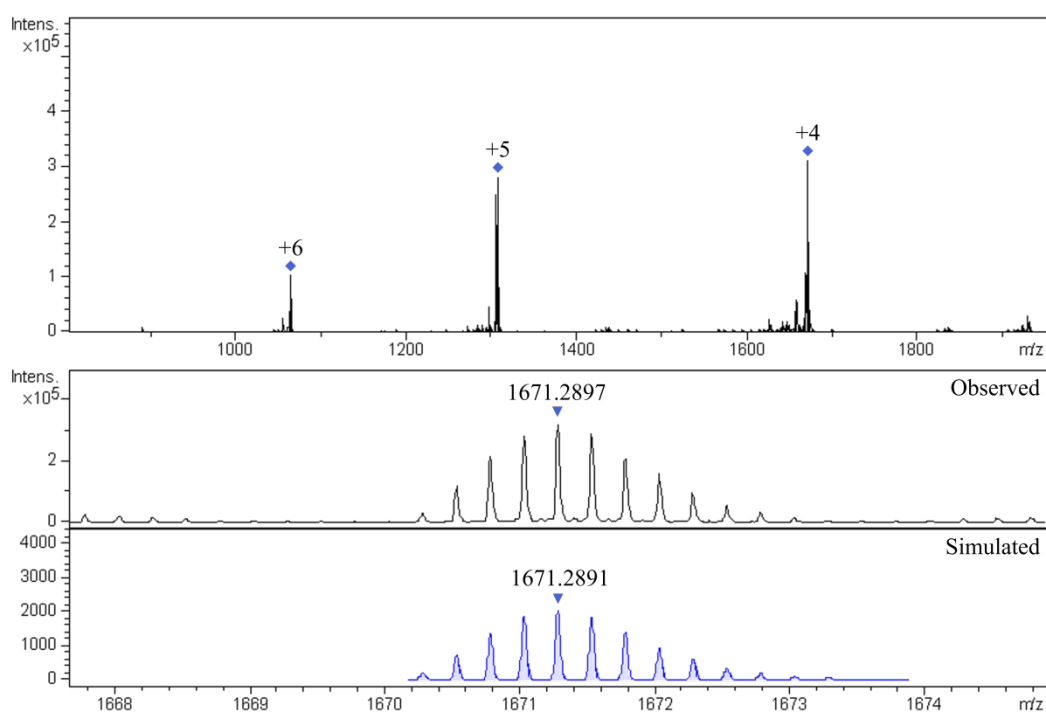

Fig. S84. High-resolution ESI-TOF-MS of  $\text{C}_{70}\text{C}_4\text{-4}$  with the comparison of observed and simulated isotopic patterns of the peaks +4.

### 3.3.8 Encapsulation of $D_2$ -C<sub>76</sub> with $S_4$ -4

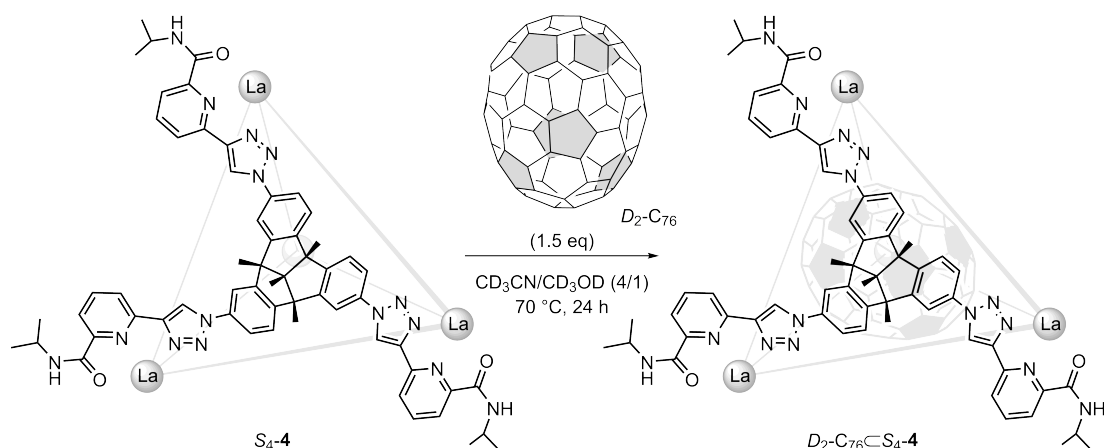

*In situ* self-assembly of  $D_2$ -C<sub>76</sub>@ $S_4$ -4: La(OTf)<sub>3</sub> (2.3 mg, 3.9  $\mu$ mol),  $C_1$ -2 (4.0 mg, 3.9  $\mu$ mol) and  $D_2$ -C<sub>76</sub> (1.4 mg, 1.5  $\mu$ mol) were mixed in a solution of CD<sub>3</sub>CN/CD<sub>3</sub>OD (v/v 4/1, 500  $\mu$ L). After stirring at 70 °C for 24 h, the insoluble excess  $D_2$ -C<sub>76</sub> was removed by centrifugation. The resulting solution was further characterized by NMR spectroscopy and high-resolution ESI-TOF-MS. <sup>1</sup>H NMR spectrum showed the quantitative formation of  $D_2$ -C<sub>76</sub>@ $S_4$ -4. The solvents were dried *in vacuo* to obtain a brown powder. Yield ca. 6.8 mg, 94%.

<sup>1</sup>H NMR (400 MHz, 298 K, CD<sub>3</sub>CN/CD<sub>3</sub>OD v/v 4/1):  $\delta$  = 9.57 (s, 2H,  $H_{51'}$ ), 9.52 (s, 2H,  $H_{51}$ ), 9.47 (s, 2H,  $H_{33'}$ ), 9.45 – 9.37 (m, 6H,  $H_{15'}$ ,  $H_{15}$  and  $H_{33}$ ), 8.84 (m, 8H,  $H_{54'}$ ,  $H_{36'}$ ,  $H_{54}$  and  $H_{36}$ ), 8.68 (m, 6H,  $H_{18'}$  and  $H_{18}$ ), 8.50 (m, 8H,  $H_{55'}$ ,  $H_{55}$ ,  $H_{37'}$  and  $H_{37}$ ), 8.38 (dd,  $J$  = 15.7, 7.9 Hz, 4H,  $H_{19'}$  and  $H_{19}$ ), 8.16 (d,  $J$  = 7.8 Hz, 2H,  $H_{56'}$ ), 8.10 (m, 8H,  $H_{38'}$ ,  $H_{38}$ ,  $H_{36'}$  and  $H_{49}$ ), 8.06 – 7.98 (m, 8H,  $H_{49'}$ ,  $H_{31}$ ,  $H_{20'}$  and  $H_{20}$ ), 7.91 (s, 2H,  $H_{31}$ ), 7.55 (m, 8H,  $H_{13'}$ ,  $H_{13}$ ,  $H_{46'}$  and  $H_{46}$ ), 7.26 – 7.11 (m, 8H,  $H_{28'}$ ,  $H_{10'}$ ,  $H_{10}$  and  $H_{28}$ ), 6.77 (m, 4H,  $H_{47'}$  and  $H_{47}$ ), 6.39 (m, 4H,  $H_{11'}$  and  $H_{11}$ ), 6.18 (d,  $J$  = 9.0 Hz, 2H,  $H_{29'}$ ), 6.04 (d,  $J$  = 8.6 Hz, 2H,  $H_{29}$ ), 3.87 – 3.74 (m, 12H,  $H_{24'}$ ,  $H_{24}$ ,  $H_{42'}$ ,  $H_{42}$ ,  $H_{60'}$  and  $H_{60}$ ), 1.59 (m, 36H,  $H_6'$ ,  $H_6$ ,  $H_7'$ ,  $H_7$ ,  $H_8'$  and  $H_8$ ), 1.28 (m, 12H,  $H_{1'}$  and  $H_1$ ), 1.12 (m, 36H,  $H_{25'}$ ,  $H_{25}$ ,  $H_{43'}$ ,  $H_{43}$ ,  $H_{61'}$  and  $H_{61}$ ), 0.92 – 0.74 (m, 36H,  $H_{26'}$ ,  $H_{26}$ ,  $H_{44'}$ ,  $H_{44}$ ,  $H_{62'}$  and  $H_{62}$ ). The <sup>13</sup>C NMR signals were too weak to be measured. High-resolution ESI-TOF-MS for  $D_2$ -C<sub>76</sub>@ $S_4$ -4. The following picked signals are those at the highest intensities.  $m/z$  Calcd for [ $D_2$ -C<sub>76</sub>@ $S_4$ -4 – 7(OTf)]<sup>7+</sup> 901.4713, found 901.4694; Calcd for [ $D_2$ -C<sub>76</sub>@ $S_4$ -4 – 6(OTf)]<sup>6+</sup> 1076.5419, found 1076.5403; Calcd for [ $D_2$ -C<sub>76</sub>@ $S_4$ -4 – 5(OTf)]<sup>5+</sup> 1321.6408, found 1321.6397; Calcd for [ $D_2$ -C<sub>76</sub>@ $S_4$ -4 – 4(OTf)]<sup>4+</sup> 1689.2891, found 1689.2883.

Encapsulation of  $D_2$ -C<sub>76</sub> with preformed cage  $S_4$ -4 (majority):  $S_4$ -4 (8 mg, 1.1  $\mu$ mol) and  $D_2$ -C<sub>76</sub> (1.6 mg, 1.7  $\mu$ mol) were mixed in a solution of CD<sub>3</sub>CN/CD<sub>3</sub>OD (v/v 4/1, 500  $\mu$ L). The mixture was stirred at 70 °C for 24 h and monitored by <sup>1</sup>H NMR.



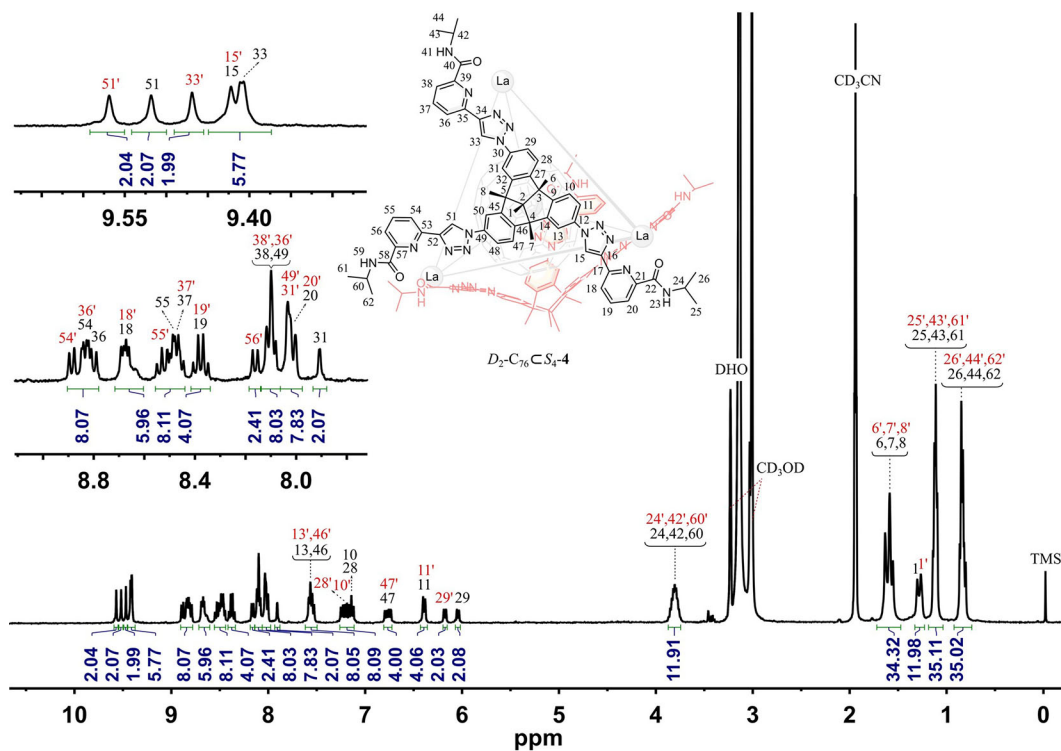

Fig. S85.  $^1\text{H}$  NMR spectrum of  $D_2\text{-C}_{76}\text{C}_{54}\text{-4}$  (400 MHz, 298 K,  $\text{CD}_3\text{CN}/\text{CD}_3\text{OD}$  v/v 4/1,  $[D_2\text{-C}_{76}\text{C}_{54}\text{-4}] = 2.0$  mM).

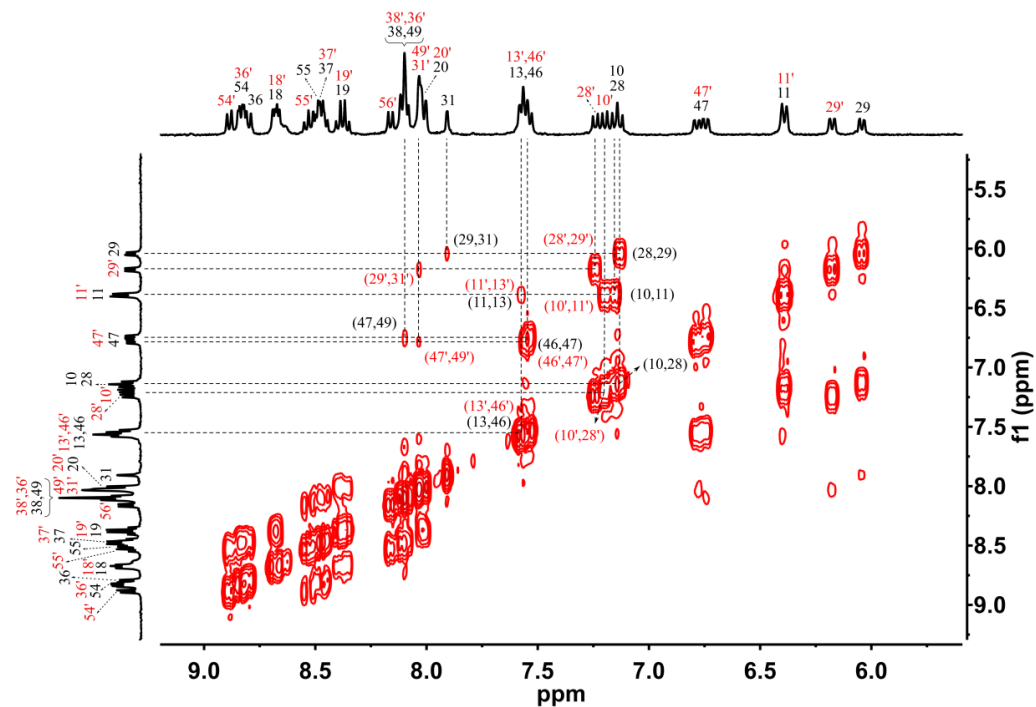

Fig. S86. Partial  $^1\text{H}$ - $^1\text{H}$  COSY spectrum of  $D_2\text{-C}_{76}\text{C}_{54}\text{-4}$  (400 MHz, 298 K,  $\text{CD}_3\text{CN}/\text{CD}_3\text{OD}$  v/v 4/1,  $[D_2\text{-C}_{76}\text{C}_{54}\text{-4}] = 2.0$  mM).

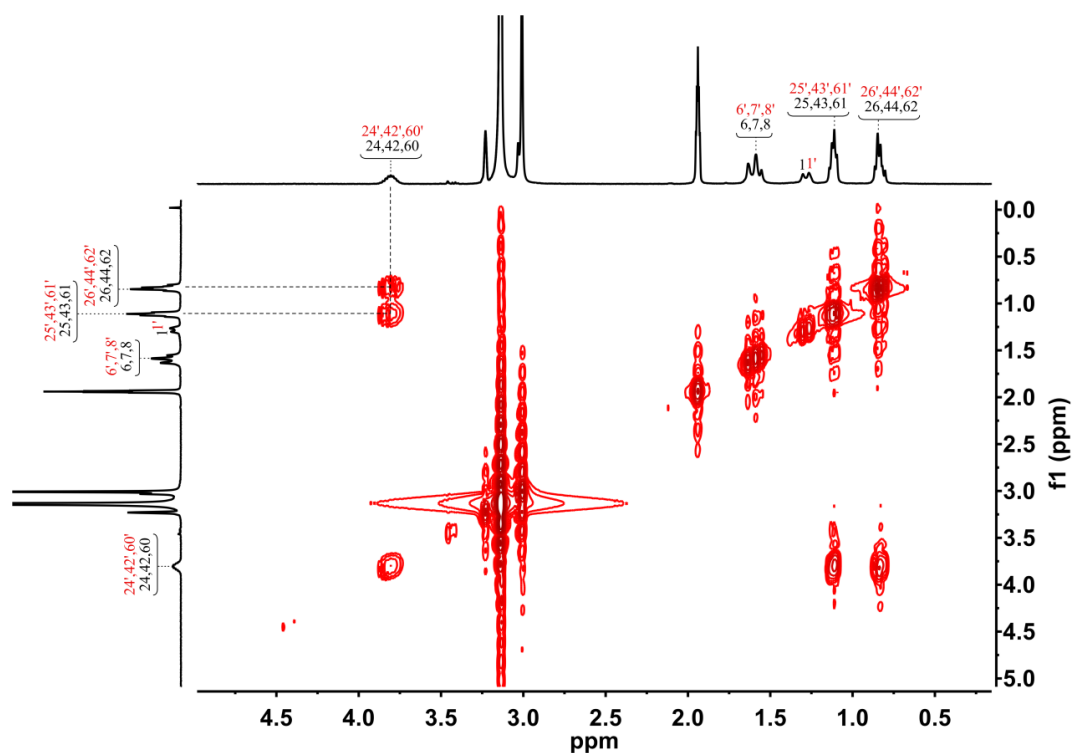

Fig. S87. Partial  $^1\text{H}$ - $^1\text{H}$  COSY spectrum of  $D_2\text{-C}_{76}\text{C-S}_4\text{-4}$  (400 MHz, 298 K,  $\text{CD}_3\text{CN}/\text{CD}_3\text{OD}$  v/v 4/1,  $[D_2\text{-C}_{76}\text{C-S}_4\text{-4}] = 2.0$  mM).

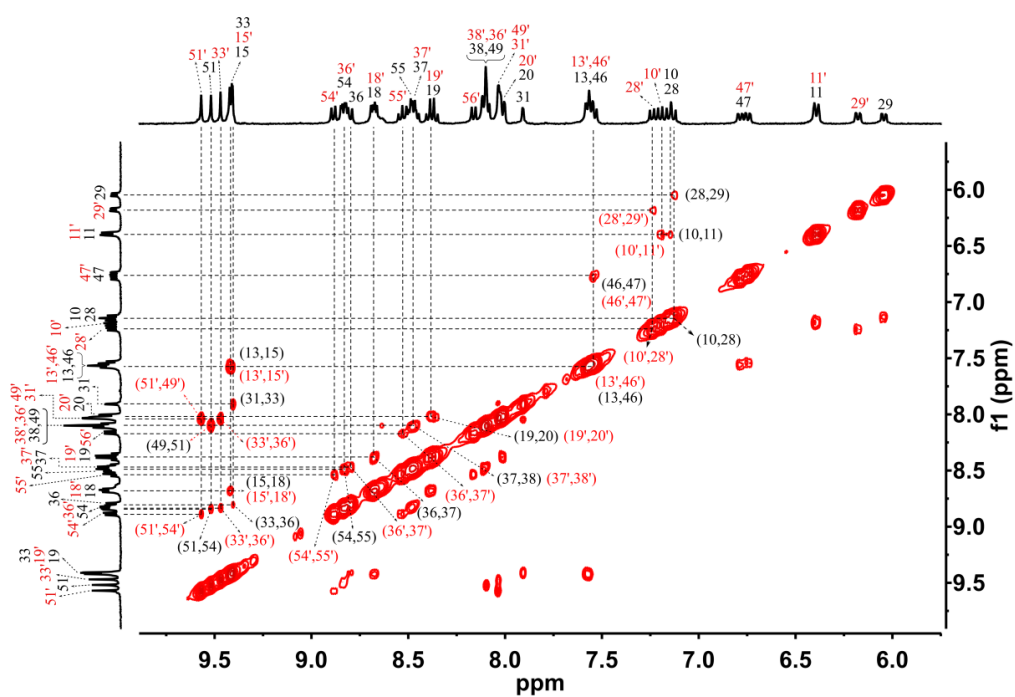

Fig. S88. Partial  $^1\text{H}$ - $^1\text{H}$  NOESY spectrum of  $D_2\text{-C}_{76}\text{C-S}_4\text{-4}$  (400 MHz, 298 K,  $\text{CD}_3\text{CN}/\text{CD}_3\text{OD}$  v/v 4/1,  $[D_2\text{-C}_{76}\text{C-S}_4\text{-4}] = 2.0$  mM).



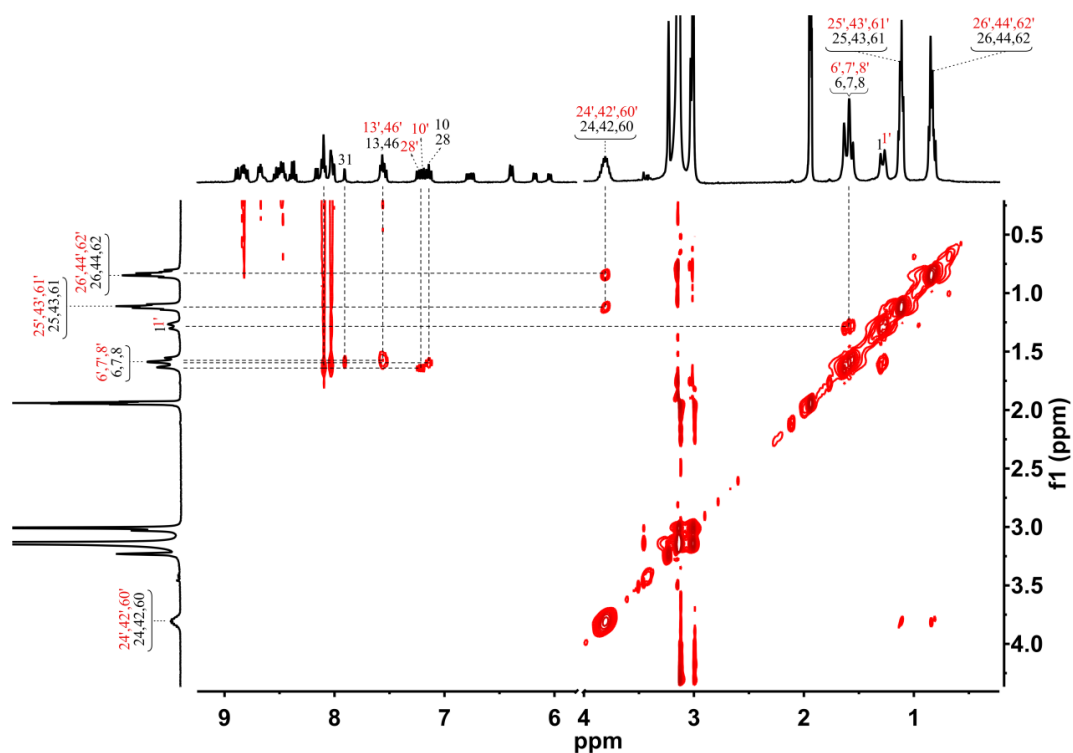

Fig. S89. Partial  $^1\text{H}$ - $^1\text{H}$  NOESY spectrum of  $D_2$ - $\text{C}_{76}\text{C-S}_4$ -**4** (400 MHz, 298 K,  $\text{CD}_3\text{CN}/\text{CD}_3\text{OD}$  v/v 4/1,  $[D_2\text{-C}_{76}\text{C-S}_4\text{-4}] = 2.0$  mM).

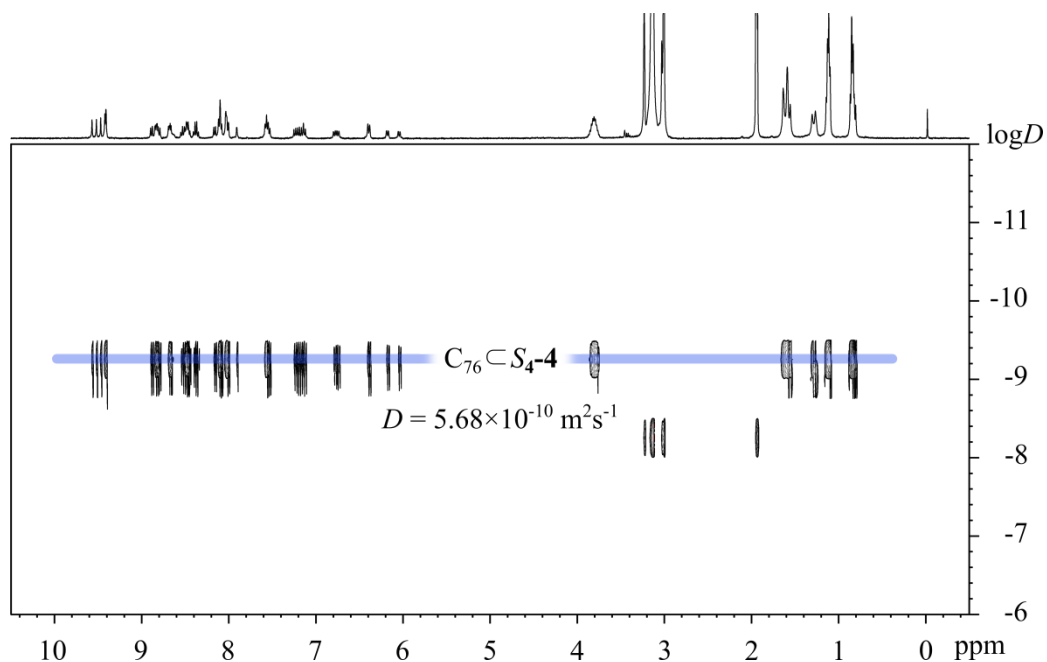

Fig. S90.  $^1\text{H}$  DOSY spectrum of  $D_2$ - $\text{C}_{76}\text{C-S}_4$ -**4** (400 MHz, 298 K,  $\text{CD}_3\text{CN}/\text{CD}_3\text{OD}$  v/v 4/1,  $[D_2\text{-C}_{76}\text{C-S}_4\text{-4}] = 2.0$  mM). The hydrodynamic diameter of  $D_2$ - $\text{C}_{76}\text{C-S}_4$ -**4** was determined to be 2.2 nm.

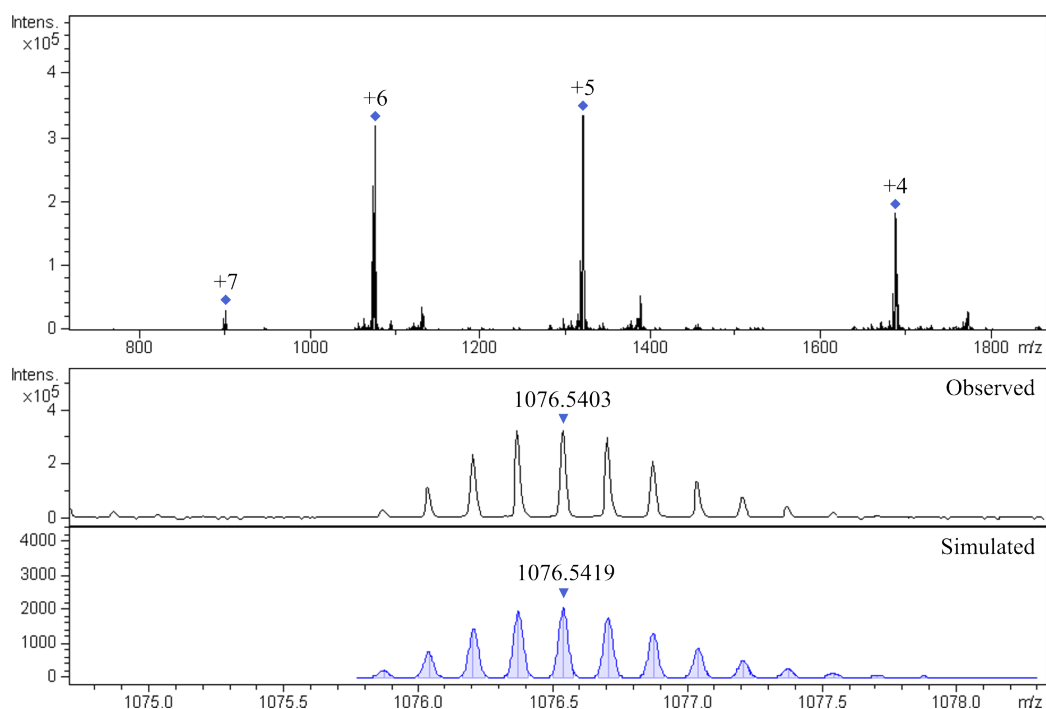

Fig. S91. High-resolution ESI-TOF-MS of  $D_2\text{-}C_{76}\text{S}_4\text{-4}$  with the comparison of observed and simulated isotopic patterns of the peaks +6.

### 3.3.9 Encapsulation of $C_{2v}\text{-}C_{78}$ with $S_4\text{-4}$

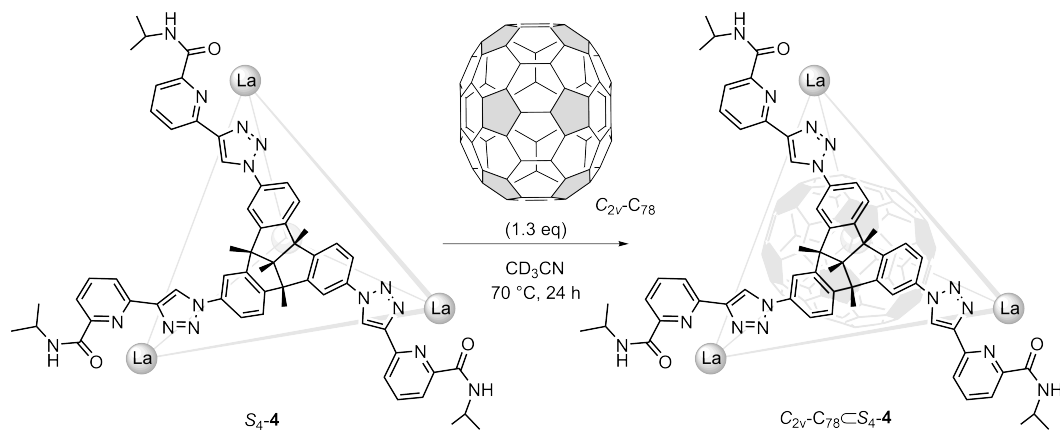

*In situ* self-assembly of  $C_{2v}\text{-}C_{78}\text{S}_4\text{-4}$ :  $\text{La}(\text{OTf})_3$  (1.3 mg, 2.2  $\mu\text{mol}$ ),  $C_1\text{-2}$  (2.3 mg, 2.2  $\mu\text{mol}$ ) and  $C_{2v}\text{-}C_{78}$  (0.7 mg, 0.8  $\mu\text{mol}$ ) were mixed in a solution of  $\text{CD}_3\text{CN}$  (500  $\mu\text{L}$ ). After stirring at 70  $^\circ\text{C}$  for 24 h, the insoluble excess  $C_{2v}\text{-}C_{78}$  was removed by centrifugation. The resulting solution was further characterized by NMR spectroscopy and high-resolution ESI-TOF-MS.  $^1\text{H}$  NMR spectrum showed the formation of a mixed host-guest complexes with  $S_4$ -symmetric (major) and  $C_2$ -symmetric (minor)  $C_{2v}\text{-}C_{78}\text{S}_4\text{-4}$ . The solvents were dried *in vacuo* to obtain a brown powder. Yield ca. 3.9 mg, 95%.

$^1\text{H}$  NMR (600 MHz, 298 K,  $\text{CD}_3\text{CN}$ )  $\delta$  = 9.43 (s, 4H,  $H_{51}$ ), 9.36 (s, 4H,  $H_{33}$ ), 9.34 (s, 4H,  $H_{15}$ ), 8.93 (d,  $J$  = 8.0 Hz, 4H,  $H_{54}$ ), 8.89 (d,  $J$  = 7.9 Hz, 4H,  $H_{36}$ ), 8.77 (d,  $J$  = 7.9 Hz, 4H,  $H_{18}$ ), 8.49 – 8.44 (m, 8H,  $H_{55}$  and  $H_{37}$ ), 8.35 (t,  $J$  = 8.0 Hz, 4H,  $H_{19}$ ), 8.23 – 8.14 (m, 12H,  $H_{41}$ ,  $H_{59}$  and  $H_{23}$ ), 8.07 – 8.01 (m, 12H,  $H_{38}$ ,  $H_{56}$  and  $H_{49}$ ), 7.98 – 7.93 (m, 8H,  $H_{20}$  and  $H_{31}$ ), 7.64 (d,  $J$  = 8.6 Hz, 4H,  $H_{46}$ ), 7.61 (d,  $J$  = 2.1 Hz, 4H,  $H_{13}$ ), 7.22 (dd,  $J$  = 8.6, 1.8 Hz, 8H,  $H_{28}$  and  $H_{10}$ ), 6.99 (dd,  $J$  = 8.6, 2.2 Hz, 4H,  $H_{47}$ ), 6.68 (dd,  $J$  = 8.5, 2.1 Hz, 4H,  $H_{11}$ ), 6.35 (dd,  $J$  = 8.6, 2.1 Hz, 4H,  $H_{29}$ ), 3.93 – 3.79 (m, 12H,  $H_{24}$ ,  $H_{42}$  and  $H_{60}$ ), 1.59 – 1.50 (m, 36H,  $H_8$ ,  $H_7$  and  $H_6$ ), 1.26 (s, 12H,  $H_I$ ), 1.15 – 1.12 (m, 36H,  $H_{25}$ ,  $H_{43}$  and  $H_{61}$ ), 0.88 – 0.84 (m, 36H,  $H_{26}$ ,  $H_{44}$  and  $H_{62}$ ). The  $^{13}\text{C}$  NMR signals were too weak to be measured. High-resolution ESI-TOF-MS for  $\text{C}_{2v}\text{-C}_{78}\text{C}_4\text{-4}$ . The following picked signals are those at the highest intensities.  $m/z$  Calcd for  $[\text{C}_{2v}\text{-C}_{78}\text{C}_4\text{-4} - 6(\text{OTf})]^{6+}$  1080.5419, found 1080.5397; Calcd for  $[\text{C}_{2v}\text{-C}_{78}\text{C}_4\text{-4} - 5(\text{OTf})]^{5+}$  1326.4408, found 1326.4362; Calcd for  $[\text{C}_{2v}\text{-C}_{78}\text{C}_4\text{-4} - 4(\text{OTf})]^{4+}$  1695.2891, found 1695.2791.

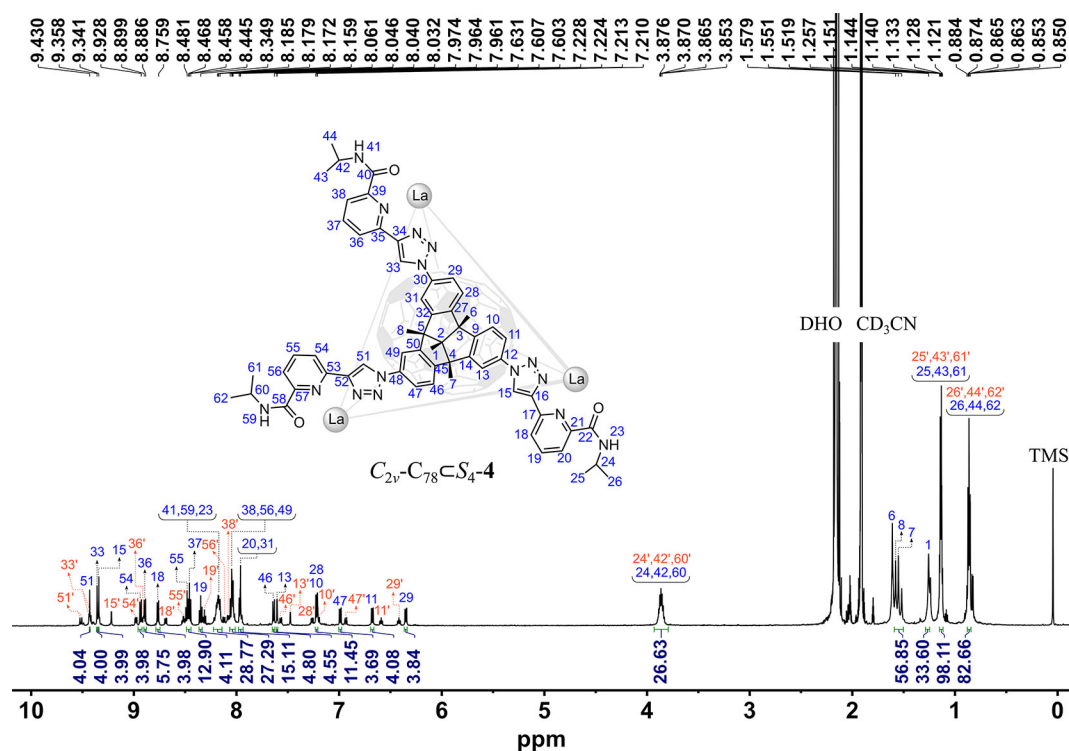

Fig. S92.  $^1\text{H}$  NMR spectrum (600 MHz, 298 K,  $\text{CD}_3\text{CN}$ ,  $[\text{C}_{2v}\text{-C}_{78}\text{C}_4\text{-4}] = 1.0$  mM) of  $\text{C}_2$ -symmetric  $\text{C}_{2v}\text{-C}_{78}\text{C}_4\text{-4}$  (orange labels) and  $\text{S}_4$ -symmetric  $\text{C}_{2v}\text{-C}_{78}\text{C}_4\text{-4}$  (blue labels).

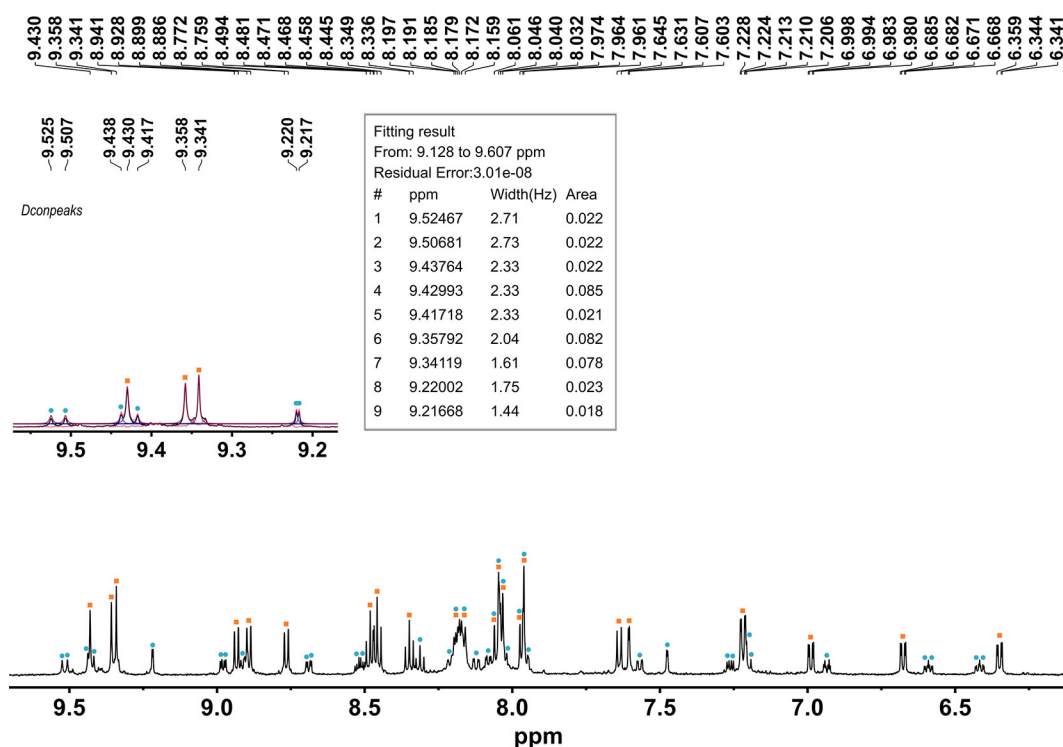

Fig. S93. Partial  $^1\text{H}$  NMR spectrum of  $\text{C}_{2v}\text{-C}_{78}\text{C-S}_4\text{-4}$  with inset showing the deconvolution result of the triazole region (600 MHz, 298 K,  $\text{CD}_3\text{CN}$ ,  $[\text{C}_{2v}\text{-C}_{78}\text{C-S}_4\text{-4}] = 1.0$  mM). Multiple overlapping signals in the triazole region are consistent with the coexistence of  $\text{C}_2$ -symmetric  $\text{C}_{2v}\text{-C}_{78}\text{C-S}_4\text{-4}$  (●) and  $\text{S}_4$ -symmetric  $\text{C}_{2v}\text{-C}_{78}\text{C-S}_4\text{-4}$  (■).

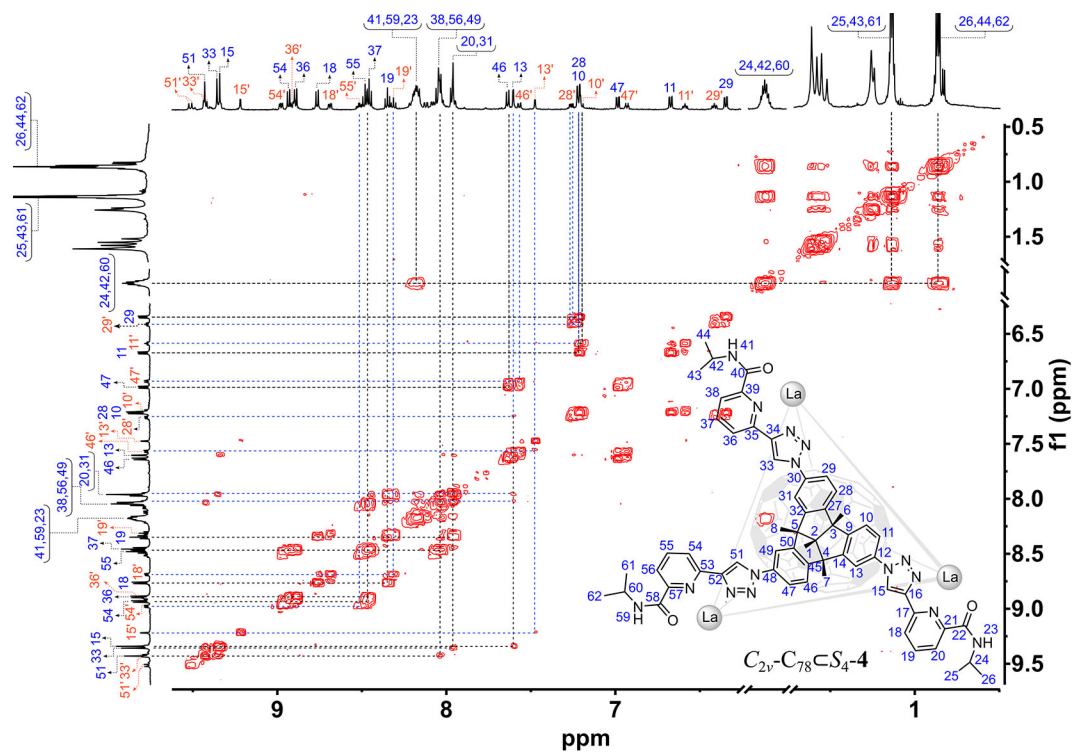

Fig. S94. Partial  $^1\text{H}$ - $^1\text{H}$  COSY spectrum of  $\text{C}_{2v}\text{-C}_{78}\text{C-S}_4\text{-4}$  (600 MHz, 298 K,  $\text{CD}_3\text{CN}$ ,  $[\text{C}_{2v}\text{-C}_{78}\text{C-S}_4\text{-4}] = 1.0$  mM).

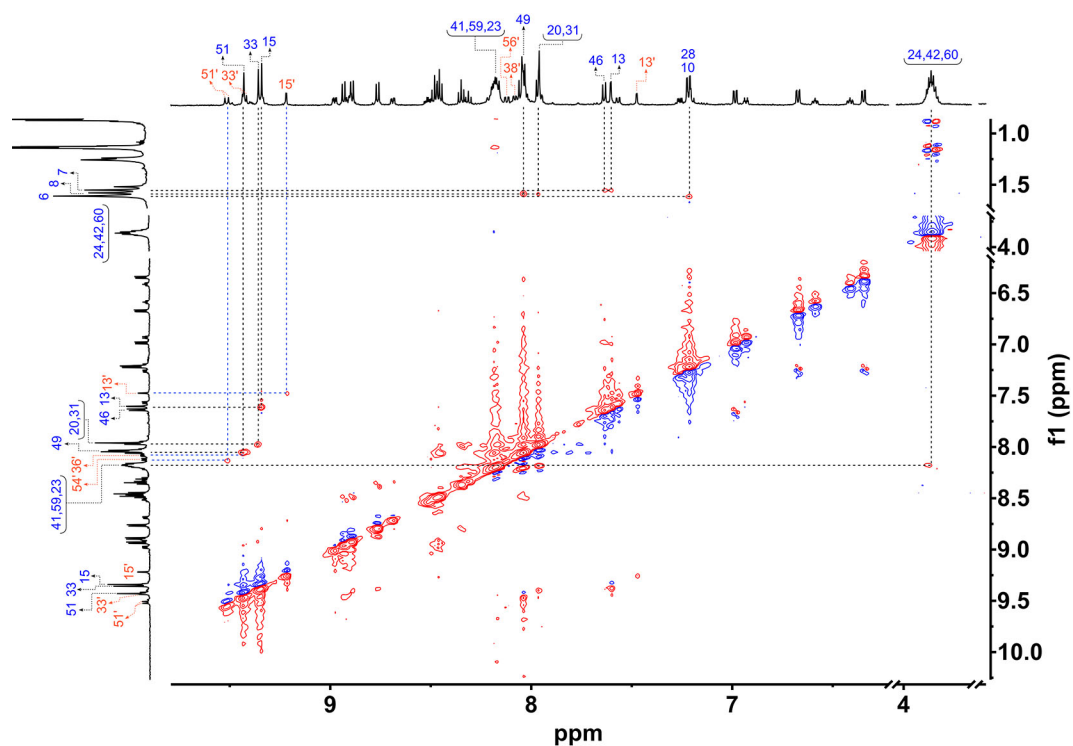

Fig. S95. Partial  $^1\text{H}$ - $^1\text{H}$  NOESY spectrum of  $\text{C}_{2v}\text{-C}_{78}\text{S}_4\text{-4}$  (600 MHz, 298 K,  $\text{CD}_3\text{CN}$ ,  $[\text{C}_{2v}\text{-C}_{78}\text{S}_4\text{-4}] = 1.0 \text{ mM}$ ).

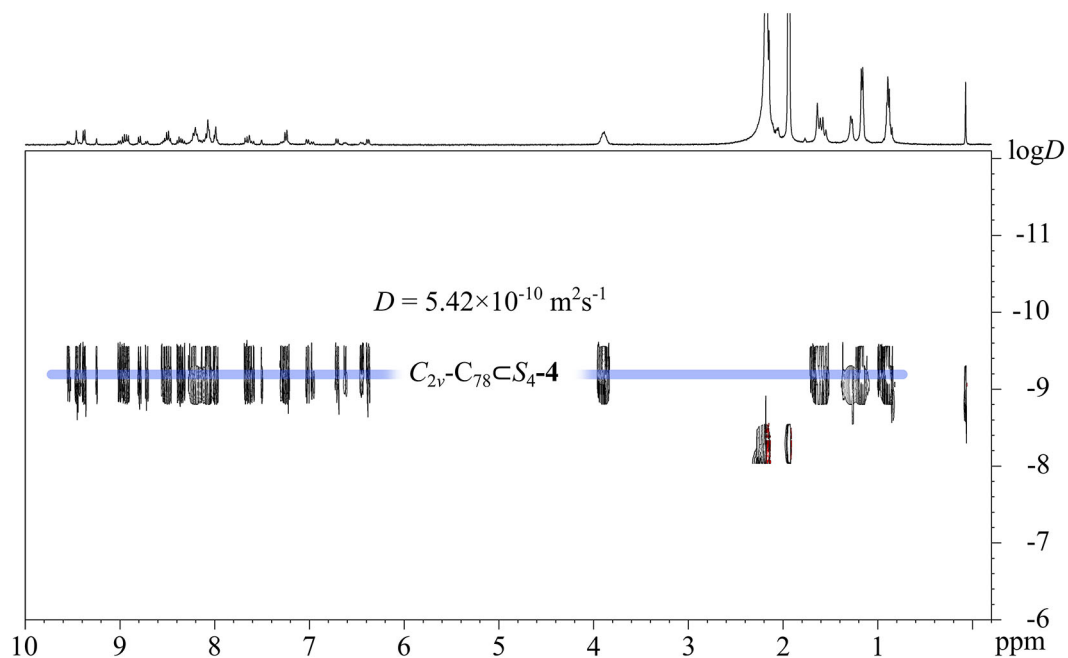

Fig. S96.  $^1\text{H}$  DOSY spectrum of  $\text{C}_{2v}\text{-C}_{78}\text{S}_4\text{-4}$  (400 MHz, 298 K,  $\text{CD}_3\text{CN}$ ,  $[\text{C}_{2v}\text{-C}_{78}\text{S}_4\text{-4}] = 1.0 \text{ mM}$ ). The hydrodynamic diameter of  $\text{C}_{2v}\text{-C}_{78}\text{S}_4\text{-4}$  was determined to be 2.2 nm.

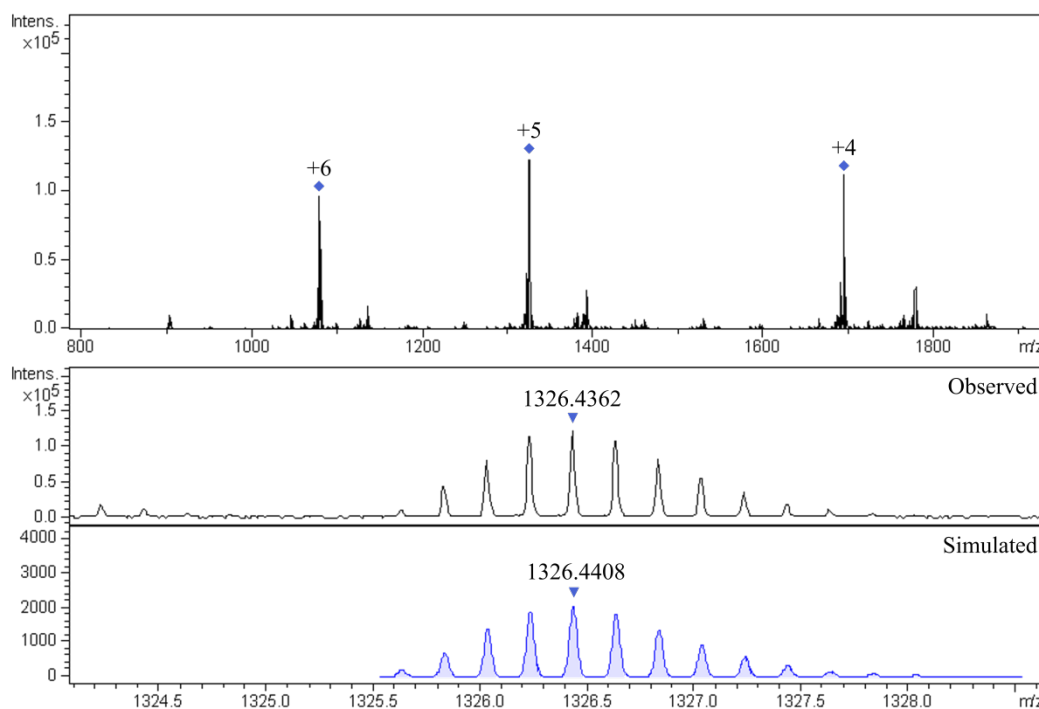

Fig. S97. High-resolution ESI-TOF-MS of  $C_{2v}'\text{-}C_{78}\text{S}_4\text{-4}$  with the comparison of observed and simulated isotopic patterns of the peaks +5.

### 3.3.10 Encapsulation of $C_{2v}'\text{-}C_{78}$ with $S_4\text{-4}$

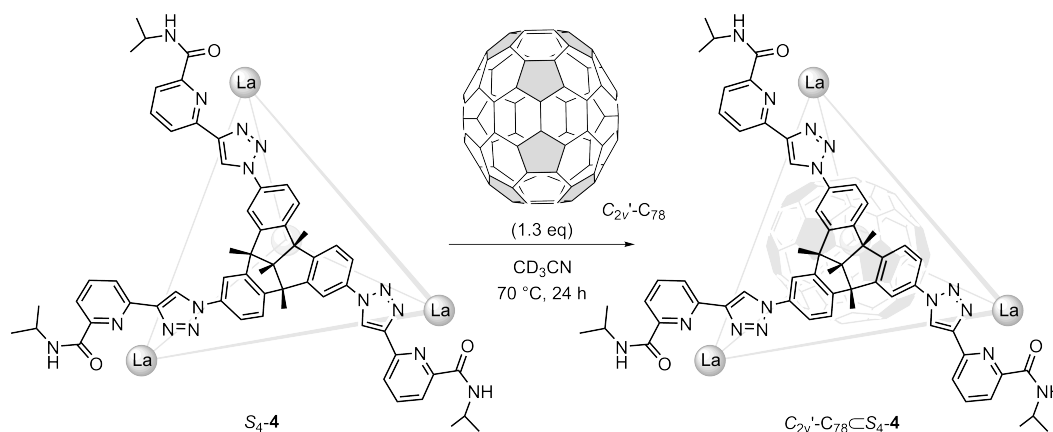

*In situ* self-assembly of  $C_{2v}'\text{-}C_{78}\text{S}_4\text{-4}$ :  $\text{La}(\text{OTf})_3$  (1.3 mg, 2.2  $\mu\text{mol}$ ),  $C_1\text{-2}$  (2.3 mg, 2.2  $\mu\text{mol}$ ) and  $C_{2v}'\text{-}C_{78}$  (0.7 mg, 0.8  $\mu\text{mol}$ ) were mixed in a solution of  $\text{CD}_3\text{CN}$  (500  $\mu\text{L}$ ). After stirring at 70  $^\circ\text{C}$  for 24 h, the insoluble excess  $C_{2v}'\text{-}C_{78}$  was removed by centrifugation. The resulting solution was further characterized by NMR spectroscopy and high-resolution ESI-TOF-MS.  $^1\text{H}$  NMR spectrum showed the quantitative formation of  $C_{2v}'\text{-}C_{78}\text{S}_4\text{-4}$ . The solvents were dried *in vacuo* to obtain a brown powder. Yield ca. 3.8 mg, 93%.

$^1\text{H}$  NMR (400 MHz, 298K,  $\text{CD}_3\text{CN}$ )  $\delta$  = 9.41 (s, 4H,  $H_{51}$ ), 9.38 (s, 4H,  $H_{33}$ ), 9.33 (s, 4H,  $H_{15}$ ), 8.91 (m, 8H,  $H_{54}$  and  $H_{36}$ ), 8.78 (d,  $J$  = 8.1 Hz, 4H,  $H_{18}$ ), 8.54 – 8.37 (m, 12H,  $H_{55}$ ,  $H_{37}$  and  $H_{19}$ ), 8.31 (m, 12H,  $H_{41}$ ,  $H_{59}$  and  $H_{23}$ ), 8.11 – 7.94 (m, 20H,  $H_{20}$ ,  $H_{38}$ ,  $H_{56}$ ,  $H_{49}$  and  $H_{31}$ ), 7.63 (m, 8H,  $H_{46}$  and  $H_{13}$ ), 7.18 (m, 8H,  $H_{28}$  and  $H_{10}$ ), 6.89 (d,  $J$  = 8.3 Hz, 4H,  $H_{47}$ ), 6.56 (d,  $J$  = 8.3 Hz, 4H,  $H_{11}$ ), 6.22 (d,  $J$  = 8.4 Hz, 4H,  $H_{29}$ ), 3.89 – 3.80 (m, 12H,  $H_{24}$ ,  $H_{42}$  and  $H_{60}$ ), 1.62 (m, 36H,  $H_6$ ,  $H_7$  and  $H_8$ ), 1.30 (s, 12H,  $H_I$ ), 1.15 (m, 36H,  $H_{25}$ ,  $H_{43}$  and  $H_{61}$ ), 0.88 (m, 36H,  $H_{26}$ ,  $H_{44}$  and  $H_{62}$ ). The  $^{13}\text{C}$  NMR signals were too weak to be measured. High-resolution ESI-TOF-MS for  $\text{C}_{2v}'\text{-C}_{78}\text{S}_4\text{-4}$ . The following picked signals are those at the highest intensities.  $m/z$  Calcd for  $[\text{C}_{2v}'\text{-C}_{78}\text{S}_4\text{-4} - 6(\text{OTf})]^{6+}$  1080.5419, found 1080.5415; Calcd for  $[\text{C}_{2v}'\text{-C}_{78}\text{S}_4\text{-4} - 5(\text{OTf})]^{5+}$  1326.4408, found 1326.4403; Calcd for  $[\text{C}_{2v}'\text{-C}_{78}\text{S}_4\text{-4} - 4(\text{OTf})]^{4+}$  1695.2891, found 1695.2893.

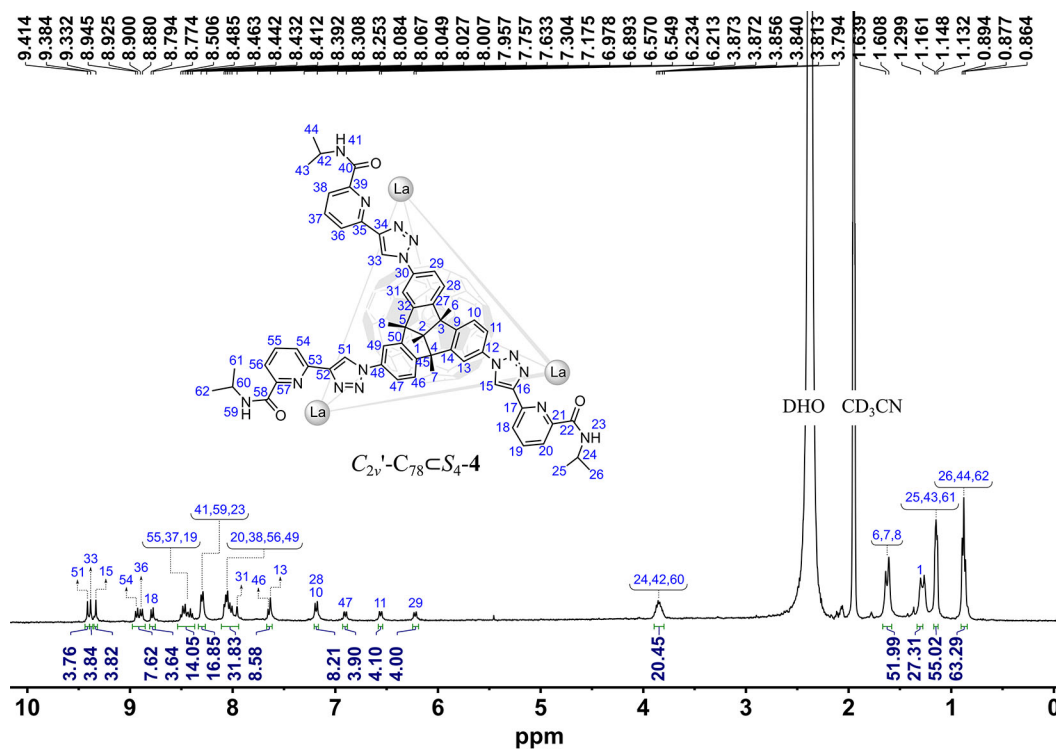

Fig. S98.  $^1\text{H}$  NMR spectrum of  $\text{C}_{2v}'\text{-C}_{78}\text{S}_4\text{-4}$  (400 MHz, 298 K,  $\text{CD}_3\text{CN}$ ,  $[\text{C}_{2v}'\text{-C}_{78}\text{S}_4\text{-4}] = 1.0$  mM).



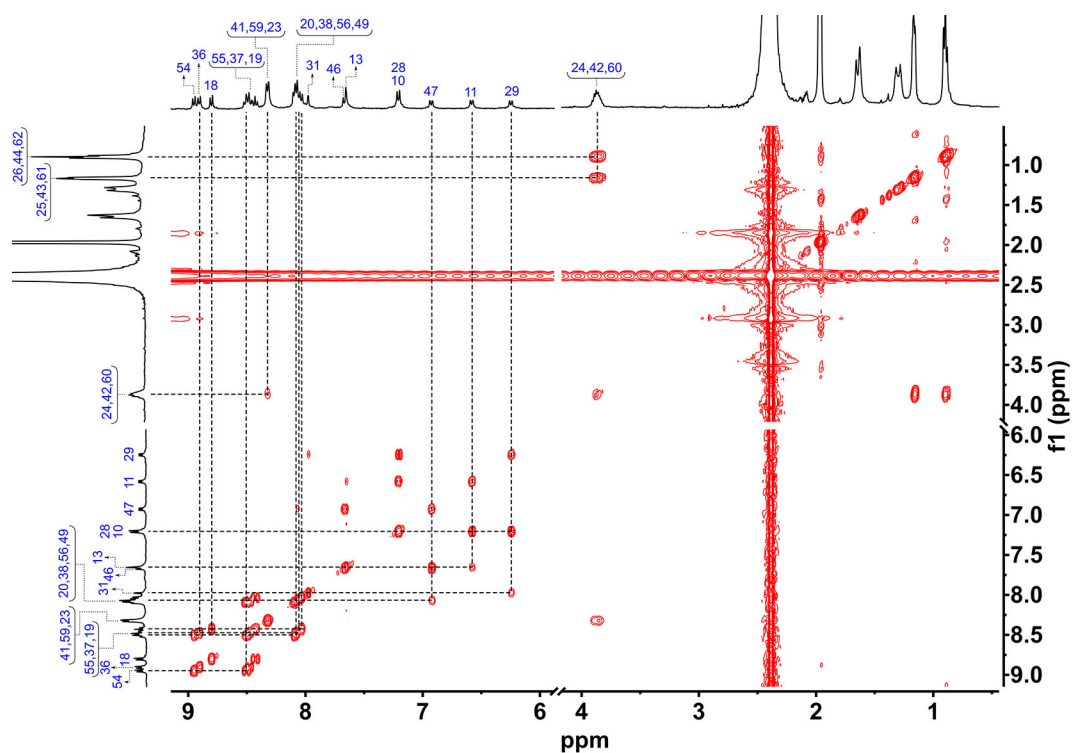

Fig. S99. Partial  $^1\text{H}$ - $^1\text{H}$  COSY spectrum of  $\text{C}_{2v}'\text{-C}_{78}\text{S}_4\text{-4}$  (400 MHz, 298 K,  $\text{CD}_3\text{CN}$ ,  $[\text{C}_{2v}'\text{-C}_{78}\text{S}_4\text{-4}] = 1.0 \text{ mM}$ ).

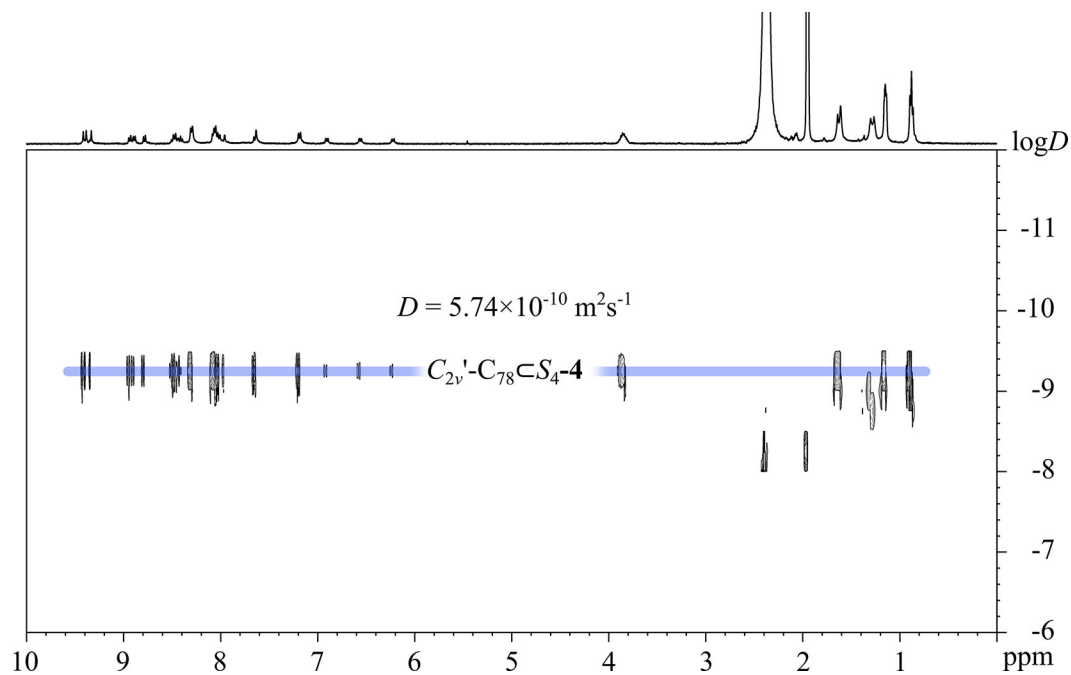

Fig. S100.  $^1\text{H}$  DOSY spectrum of  $\text{C}_{2v}'\text{-C}_{78}\text{S}_4\text{-4}$  (400 MHz, 298 K,  $\text{CD}_3\text{CN}$ ,  $[\text{C}_{2v}'\text{-C}_{78}\text{S}_4\text{-4}] = 1.0 \text{ mM}$ ). The hydrodynamic diameter of  $\text{C}_{2v}'\text{-C}_{78}\text{S}_4\text{-4}$  was determined to be 2.2 nm.



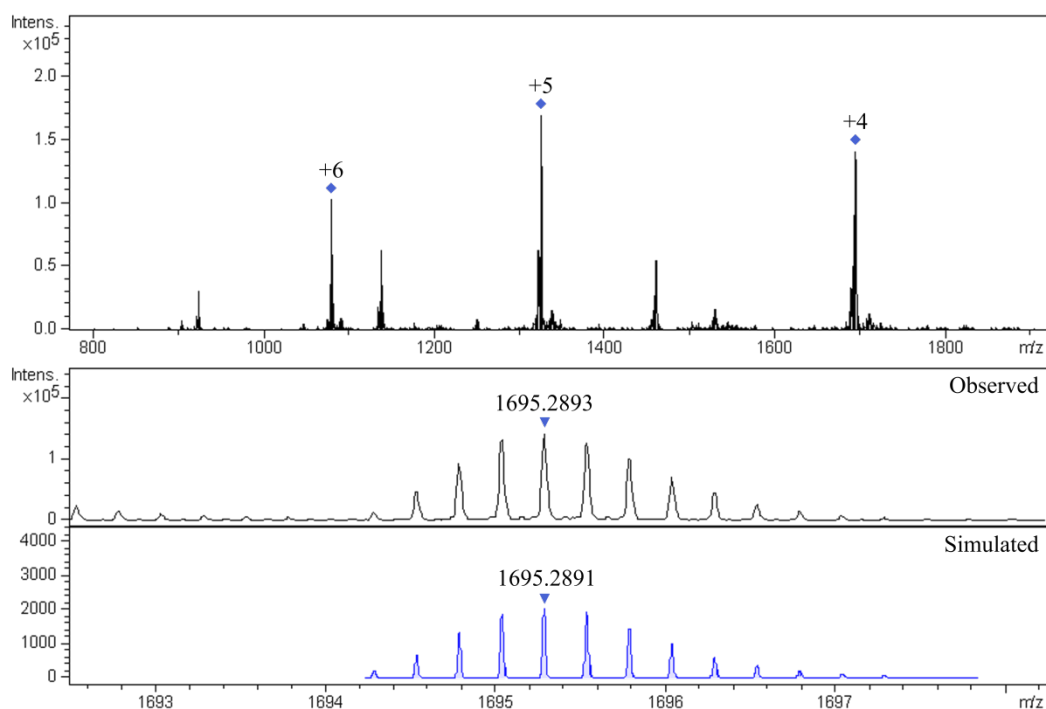

Fig. S101. High-resolution ESI-TOF-MS of  $C_{2v}'$ - $C_{78}S_4$ -**4** with the comparison of observed and simulated isotopic patterns of the peaks +4.

#### 4. Assembly Behavior of Low-Symmetry Cage

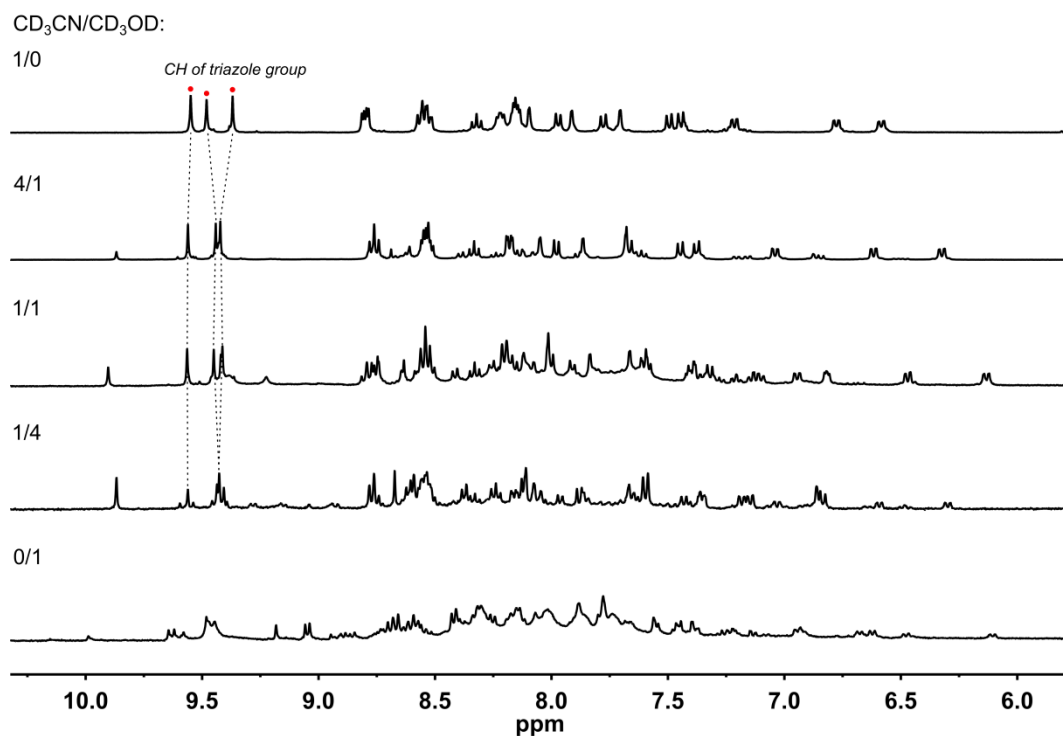

Fig. S102.  $^1\text{H}$  NMR spectra of the self-assembly of  $C_1$ -**2** (3.9 mM) and  $\text{La}(\text{OTf})_3$  under variable solvent ratio conditions (400 MHz, 298 K,  $\text{CD}_3\text{CN}/\text{MeOD}$  v/v 1/0 to 0/1).

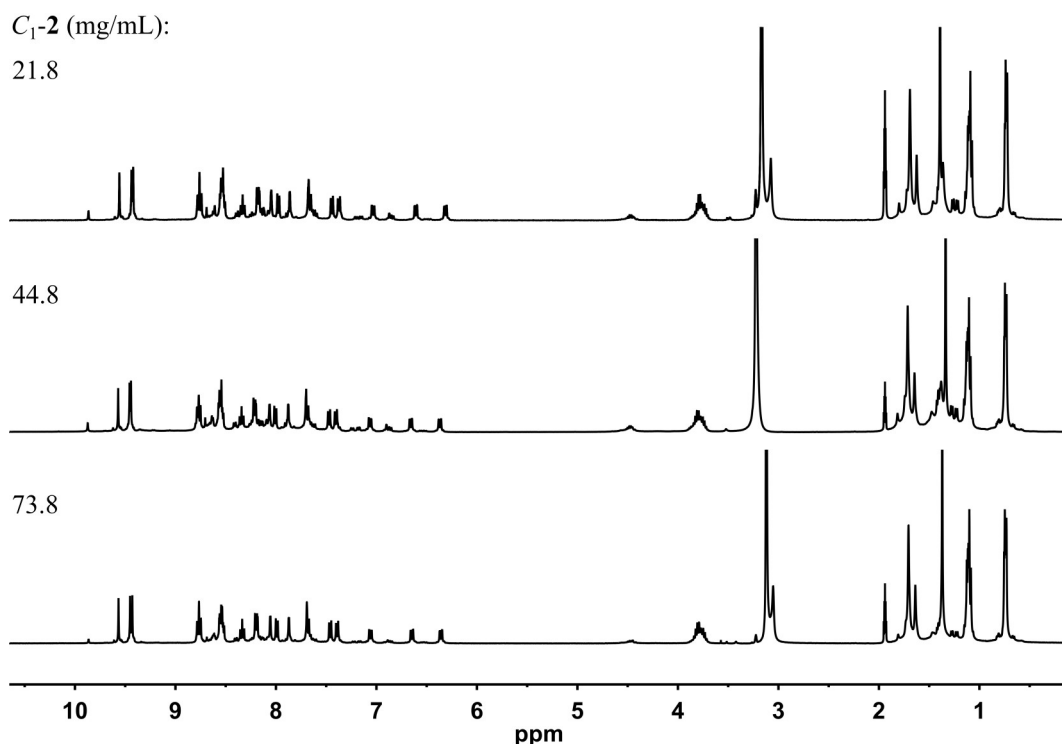

Fig. S103.  $^1\text{H}$  NMR spectra of the self-assembly of  $C_1-2$  (3.9 mM) and  $\text{La}(\text{OTf})_3$  under variable ligand concentration conditions (400 MHz, 298 K,  $\text{CD}_3\text{CN}/\text{MeOD}$  v/v 4/1).

## 5. Conformation Analysis of $P-2$

Due to the free rotation of the C-N bond,  $P-2$  could theoretically generate eight possible conformations after coordinating with  $\text{La}^{3+}$  ion. Among them, when two TPA chelating arms close to each other adopt a back-to-back arrangement,  $P-2$  forms an anion binding cavity composed of two triazole C-H, two TBTQ C-H, and two pyridine C-H. These two conformations (*iii* and *iv*) resemble the triazolophane macrocycle reported by Flood's group.<sup>S14</sup> Thus, when  $P-2$  binds to a suitable anion, the anion acts as a template that drives the convergence of the dynamic library  $\text{La}_4(C_1-2)_4$  to a single species.

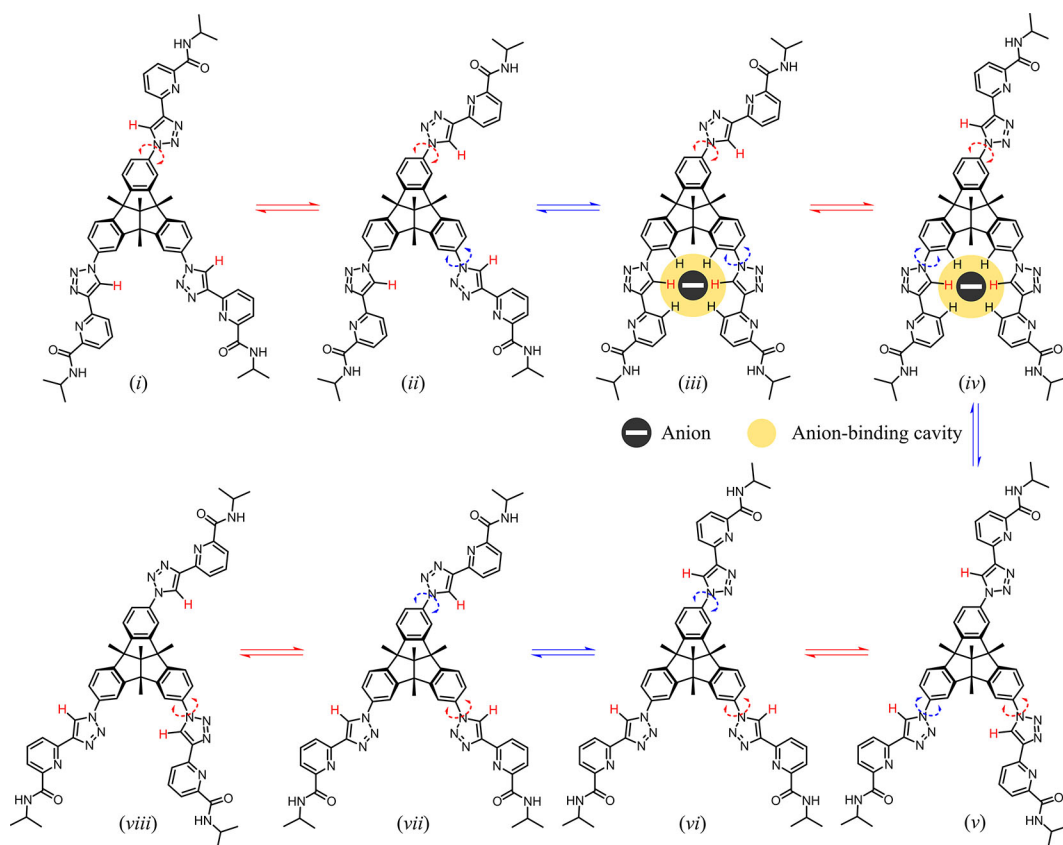

Fig. S104. Eight possible conformations of *P-2* after coordination with  $\text{La}^{3+}$  ion, where *iii* and *iv* conformations display anion-binding cavities.

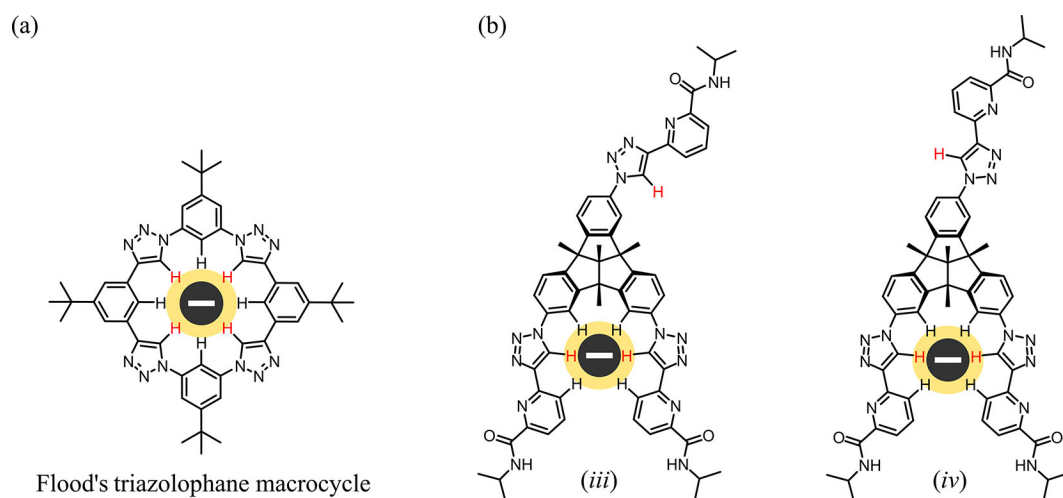

Fig. S105. (a) Flood's triazolophane macrocycle for anion recognition. (b) Two conformations of *P-2* display similar anion binding cavities.

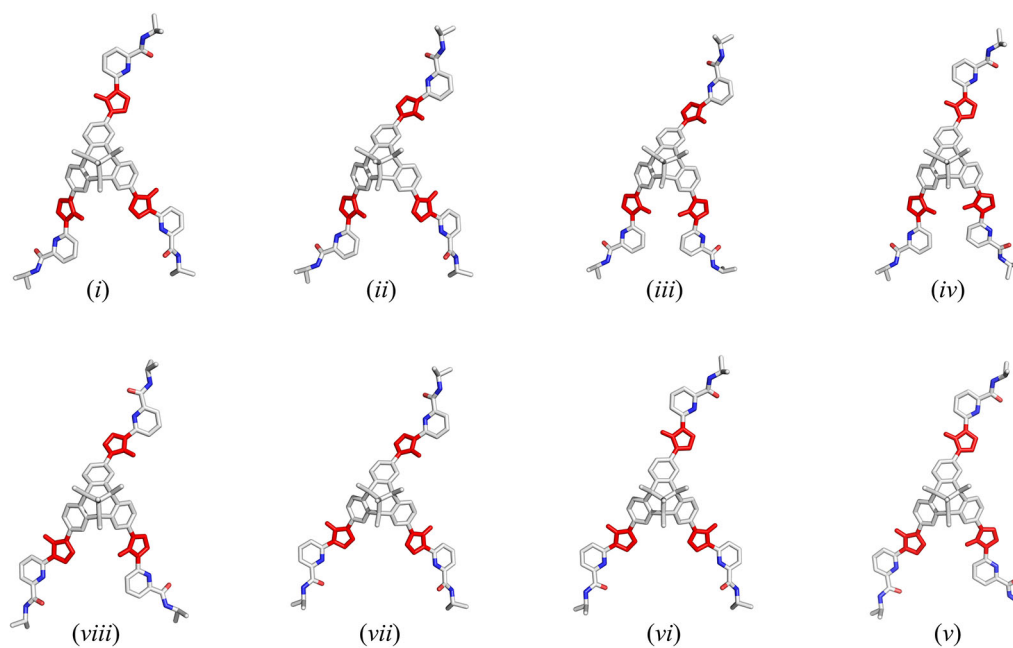

Fig. S106. Energy-optimized structures of eight conformations of *P-2* by using Materials Studio 7.0.

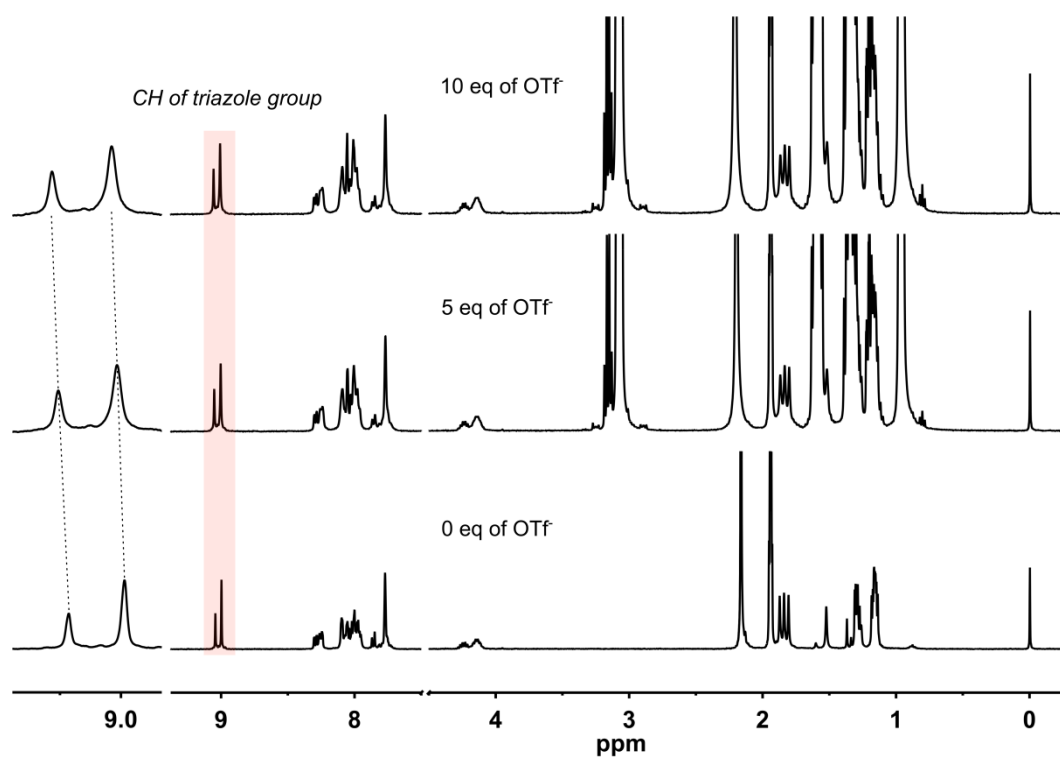

Fig. S107. <sup>1</sup>H NMR titration spectra (400 MHz, 298 K, CD<sub>3</sub>CN) of *C*<sub>1</sub>-**2** (3.9 mM) with different equiv of OTf<sup>-</sup> anion.

## 6. Stereoisomer Analysis of Pseudo-Cubic Cages

### 6.1 Stereoisomers of $\text{La}_4(\text{C}_3\text{-1})_4$

To analyze the potential isomers assembled by  $\text{C}_3\text{-1}$  and  $\text{La}^{\text{III}}$  ions, we abstracted the assemblies into brief pseudo-cubes. Each pseudo-cube consists of four metal coordination centers with the  $\Delta/\Lambda$  configurations occupying opposite vertices, and four pyramidal ligands serving as the remaining four vertices, bridging three adjacent metal centers each. Theoretically, 25 combinations ( $\Delta_4\text{-P}_4/\text{M}_4$ ,  $\Lambda_4\text{-P}_4/\text{M}_4$ ,  $\Delta_4\text{-P}_3\text{M}/\text{PM}_3$ ,  $\Lambda_4\text{-P}_3\text{M}/\text{PM}_3$ ,  $\Delta_4/\Lambda_4\text{-P}_2\text{M}_2$ ,  $\Delta_3\Lambda\text{-P}_4/\text{M}_4$ ,  $\Delta\Lambda_3\text{-P}_4/\text{M}_4$ ,  $\Delta_3\Lambda\text{-P}_3\text{M}/\text{PM}_3$ ,  $\Delta\Lambda_3\text{-P}_3\text{M}/\text{PM}_3$ ,  $\Delta_3\Lambda/\Delta\Lambda_3\text{-P}_2\text{M}_2$ ,  $\Delta_2\Lambda_2\text{-P}_4/\text{M}_4$ ,  $\Delta_2\Lambda_2\text{-P}_3\text{M}/\text{PM}_3$ ,  $\Delta_2\Lambda_2\text{-P}_2\text{M}_2$ ) could be generated by integrating the  $P/M$  configuration of ligands and the  $\Delta/\Lambda$  stereoconfiguration of metal centers. However, some combinations have many possible isomers depending on the distribution of metal coordination centers and chiral ligands. For example,  $\Delta_3\Lambda\text{-P}_3\text{M}$  could theoretically generate two isomers due to the different chemical environments of ligands at three  $a$  and one  $b$  positions (Fig. S108). Using an exhaustive method, we identified 36 possible isomers of  $\text{La}_4(\text{C}_3\text{-1})_4$  (Fig. S109).

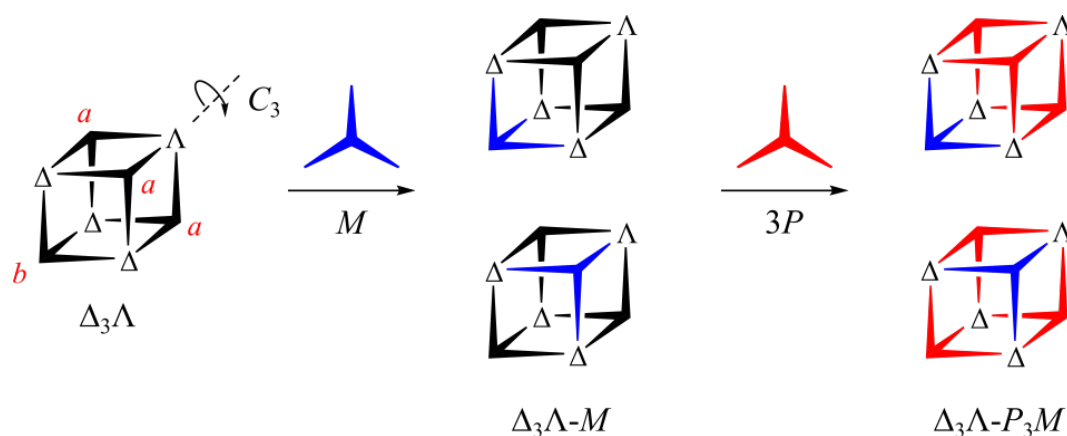

Fig. S108. Geometric analysis of potential isomers for  $\Delta_3\Lambda\text{-P}_3\text{M}$  based on symmetry operation.

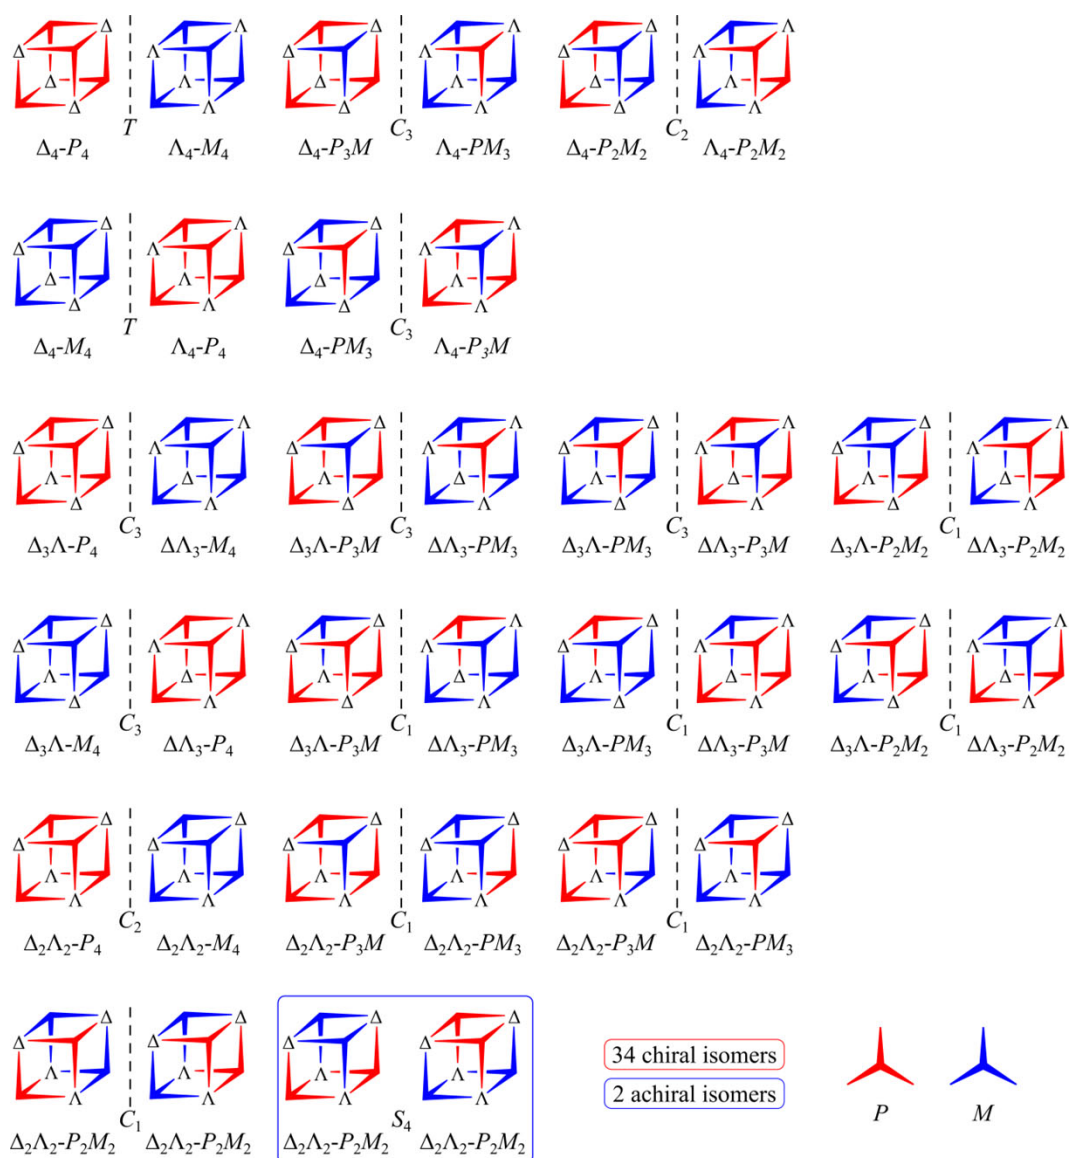

Fig. S109. Schematic structures of  $\text{La}_4(\text{C}_3\text{-1})_4$  illustrating 36 types of potential stereoisomers, of which 34 are chiral, and the remaining two are achiral (red schematic diagram represents propeller-like  $P$  configuration ligand  $\text{C}_3\text{-1}$ , while blue schematic diagram illustrates propeller-like  $M$  configuration ligand  $\text{C}_3\text{-1}$ ;  $\Delta/\Lambda$ , the chiral stereo-configuration of metal coordination centers).

## 6.2 Stereoisomers of $\text{La}_4(\text{C}_1\text{-2})_4$

Like the isomer analysis of cage **3**, cage **4** was also simplified into a pseudo-cube. Unlike ligand **1** with  $C_3$  symmetry, each  $C_1$ -symmetric ligand **2** might produce new isomers by rotating ca.  $\pm 120^\circ$  along the opposite diagonal of the pseudo-cube. Furthermore, the rotational directionality of the ligand ( $P/M$ ) and metal coordination center ( $\Delta/\Lambda$ ) would remain unchanged upon the symmetry operation. As a result, the number of isomers among the 25 combinations mentioned above between  $P/M$  and  $\Delta/\Lambda$  would increase dramatically. To simplify the difficulty of isomer analysis, we split the

25 combinations into the following nine categories according to the number of isomers. A single representation from each class was sufficient to calculate the number of isomers by symmetry operation. In the case of fixed  $\Delta/\Lambda$  metal vertices, the problem of painting  $P/M$  patterns on a pseudo-cube is similar to the mathematical classic polyhedron coloring problem, which can be calculated by Burnside's Lemme equation.

### (1) Isomer analysis of $\Delta_4-P_4$ , $\Delta_4-M_4$ , $\Lambda_4-P_4$ and $\Lambda_4-M_4$

For  $\Delta_4-P_4$ , we solved this problem by analyzing the symmetry elements of  $\Delta_4$ : one identity operation ( $E$ ), three  $C_2$  rotational operations, four  $C_3$  rotational operations, and the permutation groups of vertical patterns, as listed in the following Table S1.

Table S1. Calculation of the potential patterned pseudo-cube  $\Delta_4-P_4$  (inset indicating  $T$ -symmetric pseudo-cube  $\Delta_4$ ).

$T$ :

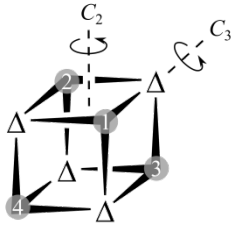

$\Delta\Delta\Delta\Delta-P_4$

| $SE^i$  | $PG^{ii}$    | $SE^i$  | $PG^{ii}$ | Types of painted cubes                                     |
|---------|--------------|---------|-----------|------------------------------------------------------------|
| E       | (1)(2)(3)(4) | $C_3^1$ | (134)(2)  | $\frac{3^4 + 3 \times 3^2 + 8 \times 3^2}{1 + 3 + 8} = 15$ |
| $C_2^1$ | (12)(34)     | $C_3^2$ | (143)(2)  |                                                            |
| $C_2^1$ | (13)(24)     | $C_3^1$ | (124)(3)  |                                                            |
| $C_2^1$ | (14)(23)     | $C_3^2$ | (142)(1)  |                                                            |
| $C_3^1$ | (234)(1)     | $C_3^1$ | (123)(4)  |                                                            |
| $C_3^2$ | (243)(1)     | $C_3^2$ | (132)(4)  |                                                            |

(i): Symmetry elements (SE); (ii): Permutation groups (PG).

### (2) Isomer analysis of $\Delta_4-P_3M$ , $\Delta_4-PM_3$ , $\Lambda_4-P_3M$ and $\Lambda_4-PM_3$

For  $\Delta_4-P_3M$ , when a  $M$  chiral ligand is first fixed to a specific pseudo-cube  $\Delta_4$  (four ligand positions are equivalent), the resulting  $\Delta_4-M$  has  $C_1$  symmetry, and it has only one identity operation ( $E$ ). The permutation group is listed in the following Table S2.

Table S2. Calculation of the potential patterned pseudo-cube  $\Delta_4-P_3M$  (inset indicating  $C_1$ -symmetric pseudo-cube  $\Delta_4-M$ ).

$C_1$ :

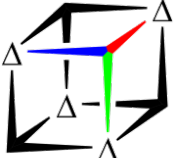

$\Delta\Delta\Delta\Delta-P_3M$

| $SE^i$ | $PG^{ii}$ | Types of painted cubes |
|--------|-----------|------------------------|
| E      | (1)(2)(3) | $\frac{3^3}{1} = 27$   |

(i): Symmetry elements (SE); (ii): Permutation groups (PG).

### (3) Isomer analysis of $\Delta_4-P_2M_2$ and $\Lambda_4-P_2M_2$

Since any ligand is adjacent to the remaining three ligands, we preferentially fix two  $M$  chiral ligands to a pseudo-cube  $\Delta_4$ . Fig. S110 shows six possible arrangements for two adjacent  $M$  chiral ligands. Three of them show  $C_2$  symmetry, and the others show  $C_1$  symmetry. The combination of six  $M_2$  patterns with a pseudo-cube  $\Delta_4$  gives three

$C_2$ -symmetric and three  $C_1$ -symmetric  $\Delta_4$ - $M_2$ . The number of isomers of  $\Delta_4$ - $P_2M_2$  can be simplified as the coloring problem of two  $P$  chiral ligands on six types of pseudo-cubes  $\Delta_4$ - $M_2$ . The permutation groups of vertical patterns are listed in the following Table S3-S4.

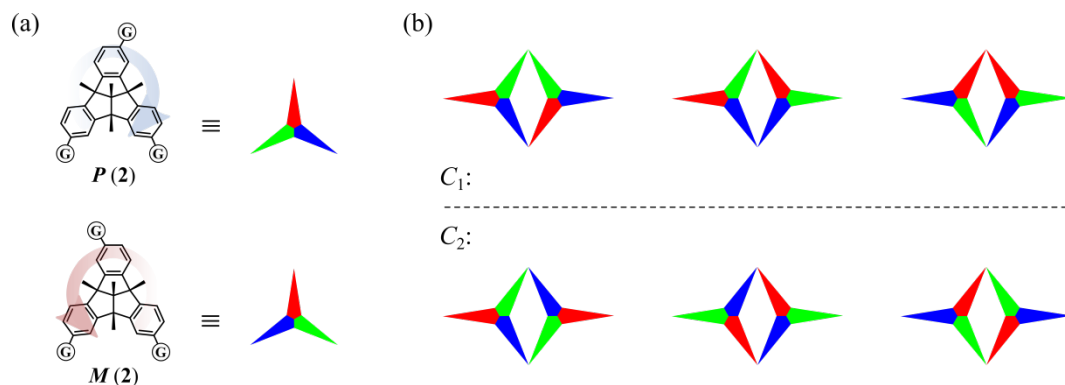

Fig. S110. (a) The P/M configuration ligands are represented by schematic diagrams with different color orders (G, cheating arms); (b) Six possible patterns of two adjacent  $M$  chiral ligands.

Table S3. Calculation of the potential patterned pseudo-cube  $\Delta_4$ - $P_2M_2$  (inset indicating three  $C_2$ -symmetric pseudo-cubes  $\Delta_4$ - $M_2$ ).

$\Delta\Delta\Delta\Delta$ - $P_2M_2$

$C_2$ : 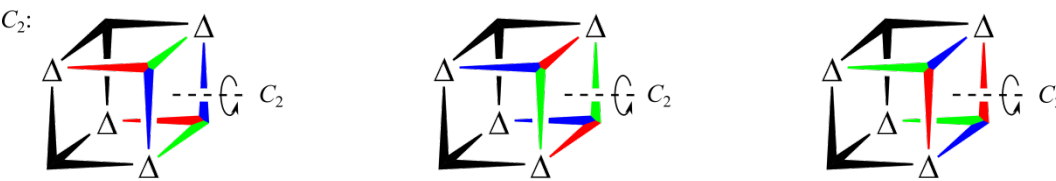

| SE <sup>i</sup> | PG <sup>ii</sup> | Types of painted cubes                  |
|-----------------|------------------|-----------------------------------------|
| E               | (1)(2)           | $\frac{3^2 + 3^1}{1 + 1} \times 3 = 18$ |
| $C_2^1$         | (12)             |                                         |

(i): Symmetry elements (SE); (ii): Permutation groups (PG).



Table S4. Calculation of the potential patterned pseudo-cube  $\Delta_4-P_2M_2$  (inset indicating three  $C_1$ -symmetric pseudo-cubes  $\Delta_4-M_2$ ).

$\Delta\Delta\Delta\Delta-P_2M_2$

$C_1$ : 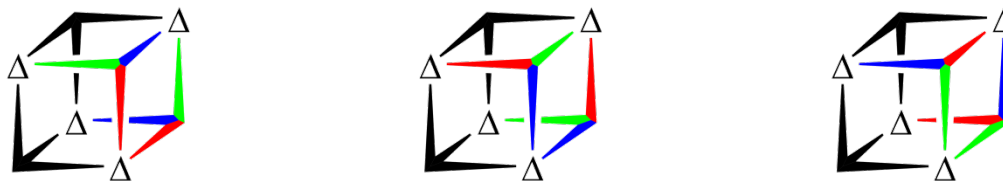

| SE <sup>i</sup> | PG <sup>ii</sup> | Types of painted cubes        |
|-----------------|------------------|-------------------------------|
| E               | (1)(2)           | $\frac{3^2}{1} \times 3 = 27$ |

(i): Symmetry elements (SE); (ii): Permutation groups (PG).

(4) Isomer analysis of  $\Delta_3\Lambda-P_4$ ,  $\Delta_3\Lambda-M_4$ ,  $\Delta\Lambda_3-P_4$  and  $\Delta\Lambda_3-M_4$

For  $\Delta_3\Lambda-P_4$ , we solved this problem by analyzing the symmetry elements of pseudo-cube  $\Delta_3\Lambda$ : one identity operation ( $E$ ), one  $C_3$  rotational operation, and the permutation groups of vertical patterns, as listed in the following Table S5.

Table S5. Calculation of the potential patterned pseudo-cube  $\Delta_3\Lambda-P_4$  (inset indicating  $C_3$ -symmetric pseudo-cube  $\Delta_3\Lambda$ ).

$\Delta\Delta\Delta\Lambda-P_4$

$C_3$ : 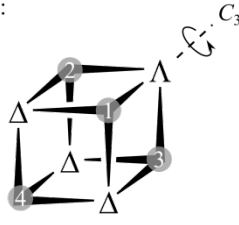

| SE <sup>i</sup> | PG <sup>ii</sup> | Types of painted cubes                  |
|-----------------|------------------|-----------------------------------------|
| E               | (1)(2)(3)(4)     | $\frac{3^4 + 2 \times 3^2}{1 + 2} = 33$ |
| $C_3^1$         | (123)(4)         |                                         |
| $C_3^2$         | (132)(4)         |                                         |

(i): Symmetry elements (SE); (ii): Permutation groups (PG).

(5) Isomer analysis of  $\Delta_3\Lambda-P_3M$ ,  $\Delta_3\Lambda-PM_3$ ,  $\Delta\Lambda_3-P_3M$  and  $\Delta\Lambda_3-PM_3$

Given the  $C_3$  rotation axis of pseudo-cube  $\Delta_3\Lambda$ , ligand positions 1,2,3 are equivalent but not 4. Thus, six isomers with  $C_1$  symmetry can be obtained by fixing one  $M$  chiral ligand on the pseudo-cube  $\Delta_3\Lambda$ . The number of isomers of  $\Delta_3\Lambda-P_3M$  can be simplified as the coloring problem of three  $P$  chiral ligands on six types of pseudo-cubes  $\Delta_3\Lambda-M$ . The resulting six  $\Delta_3\Lambda-M$  all exhibit one identity operation ( $E$ ). The permutation operations are listed in the following Table S6.

Table S6. Calculation of the potential patterned pseudo-cube  $\Delta_3\Lambda$ - $P_3M$  (inset indicating six  $C_1$ -symmetric pseudo-cubes  $\Delta_3\Lambda$ - $M$ ).

$\Delta\Delta\Delta\Lambda$ - $P_3M$

$C_1$ :

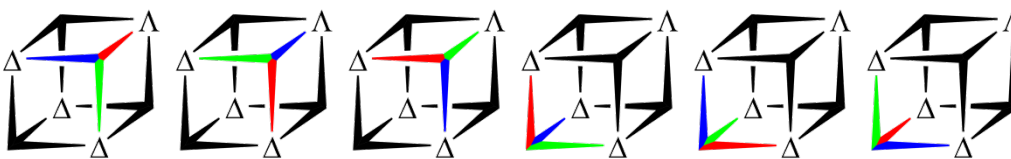

| SE <sup>i</sup> | PG <sup>ii</sup> | Types of painted cubes         |
|-----------------|------------------|--------------------------------|
| E               | (1)(2)(3)        | $\frac{3^3}{1} \times 6 = 162$ |

(i): Symmetry elements (SE); (ii): Permutation groups (PG).

#### (6) Isomer analysis of $\Delta_3\Lambda$ - $P_2M_2$ and $\Delta\Lambda_3$ - $P_2M_2$

In our previous analysis of  $\Delta_4$ - $P_2M_2$  isomer, we mentioned six possible patterns (three with  $C_2$  symmetry and three with  $C_1$  symmetry) that result from combining two  $M$  chiral ligands. Here, when  $M_2$  is attached to the pseudo-cube  $\Delta_3\Lambda$ , it must pass through one of the six edges (ABCDEF) of the embedded tetrahedron. Moreover, due to the  $C_3$  symmetry of the pseudo-cube  $\Delta_3\Lambda$ , edges A, B and C (or D, E and F) are equivalent. Therefore, six possible  $\Delta_3\Lambda$ - $M_2$  isomers can be obtained by attaching three types of  $M_2$  with  $C_2$  symmetry. By immobilizing three types of  $M_2$  with  $C_1$  symmetry to the pseudo-cube  $\Delta_3\Lambda$ , we can get twelve possible  $\Delta_3\Lambda$ - $M_2$  isomers. The number of isomers for  $\Delta_3\Lambda$ - $P_2M_2$  can be simplified as a coloring problem of two  $P$  chiral ligands on eighteen types of pseudo-cubes  $\Delta_3\Lambda$ - $M_2$ . The permutation groups of vertical patterns are listed in the following Table S7.

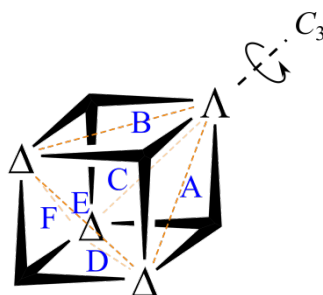

Table S7. Calculation of the potential patterned pseudo-cube  $\Delta_3\Lambda-P_2M_2$  (inset indicating eighteen  $C_1$ -symmetric pseudo-cubes  $\Delta_3\Lambda-M_2$ ).

$\Delta\Delta\Delta\Lambda-P_2M_2$

$C_1$ :

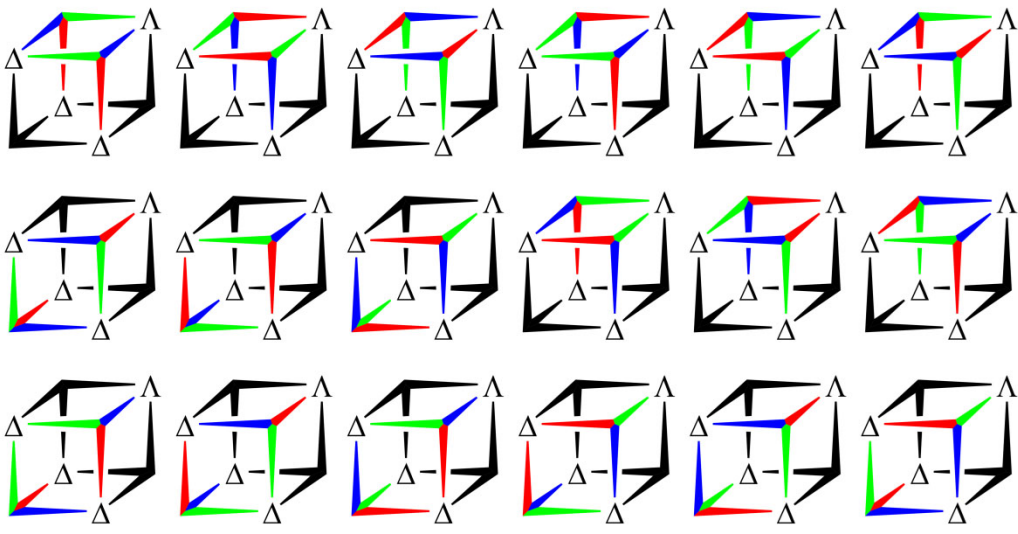

| SE <sup>i</sup> | PG <sup>ii</sup> | Types of painted cubes          |
|-----------------|------------------|---------------------------------|
| E               | (1)(2)           | $\frac{3^2}{1} \times 18 = 162$ |

(i): Symmetry elements (SE); (ii): Permutation groups (PG).

#### (7) Isomer analysis of $\Delta_2\Lambda_2-P_4$ and $\Delta_2\Lambda_2-M_4$

For  $\Delta_2\Lambda_2-P_4$ , we solved this problem by analyzing the symmetry elements of pseudo-cube  $\Delta_2\Lambda_2$ : one identity operation ( $E$ ), one  $C_2$  rotational operation, and the permutation groups of vertical patterns, as listed in the following Table S8.

Table S8. Calculation of the potential patterned pseudo-cube  $\Delta_2\Lambda_2-P_4$  (inset indicating  $C_2$ -symmetric pseudo-cube  $\Delta_2\Lambda_2$ ).

$\Delta\Delta\Delta\Lambda-P_4$

$C_2$ :

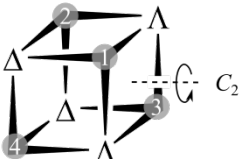

| SE <sup>i</sup> | PG <sup>ii</sup> | Types of painted cubes         |
|-----------------|------------------|--------------------------------|
| E               | (1)(2)(3)(4)     | $\frac{3^4 + 3^2}{1 + 1} = 45$ |
| $C_2^1$         | (13)(24)         |                                |

(i): Symmetry elements (SE); (ii): Permutation groups (PG).

#### (8) Isomer analysis of $\Delta_2\Lambda_2-P_3M$ and $\Delta_2\Lambda_2-PM_3$

Given the  $C_2$  rotation axis of pseudo-cube  $\Delta_2\Lambda_2$ , ligand positions 1, 3 (or 2, 4) are equivalent. By immobilizing one  $M$  chiral ligand on pseudo-cube  $\Delta_2\Lambda_2$ , we can generate six isomers of  $\Delta_2\Lambda_2-M$ . We can simplify the number of isomers for  $\Delta_2\Lambda_2-P_3M$  as a coloring problem of three  $P$  chiral ligands on six types of pseudo-cubes  $\Delta_2\Lambda_2-M$ . The permutation groups of vertical patterns are listed in the following Table S9.

Table S9. Calculation of the potential patterned pseudo-cube  $\Delta_2\Lambda_2-P_3M$  (inset indicating  $C_1$ -symmetric pseudo-cube  $\Delta_2\Lambda_2-M$ ).

$\Delta\Delta\Delta\Lambda-P_3M$

$C_1$ :

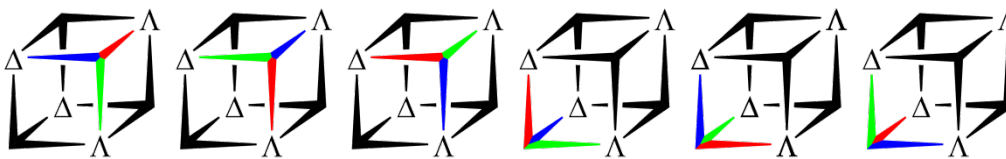

| SE <sup>i</sup> | PG <sup>ii</sup> | Types of painted cubes         |
|-----------------|------------------|--------------------------------|
| E               | (1)(2)(3)        | $\frac{3^3}{1} \times 6 = 162$ |

(i): Symmetry elements (SE); (ii): Permutation groups (PG).

### (9) Isomer analysis of $\Delta_2\Lambda_2-P_2M_2$

Since the pseudo-cube  $\Delta_2\Lambda_2$  has a  $C_2$  rotation axis, the ligand positions 1 and 3 (or 2 and 4) are equivalent. To preserve the original  $C_2$  rotation axis of the pseudo-cube  $\Delta_2\Lambda_2$ , three  $M_2$  patterns with  $C_2$  symmetry can be fixed along either edge A or F of the embedded tetrahedron, resulting in six possible  $C_2$ -symmetric  $\Delta_2\Lambda_2-M_2$ . On the other hand, placing six  $M_2$  patterns on any of the other four edges (BCDE) can generate 42 possible  $C_1$ -symmetric  $\Delta_2\Lambda_2-M_2$  isomers. The number of isomers for  $\Delta_2\Lambda_2-P_2M_2$  can be simplified as a coloring problem of two  $P$  chiral ligands on six  $C_2$ -symmetric pseudo-cubes  $\Delta_2\Lambda_2-M_2$  and 42  $C_1$ -symmetric pseudo-cubes  $\Delta_2\Lambda_2-M_2$ . The permutation groups of vertical patterns are listed in the following Table S10-S11.

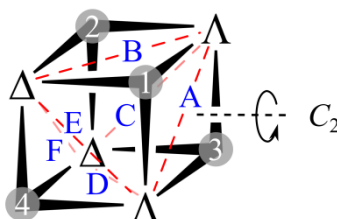

Table S10. Calculation of the potential patterned pseudo-cube  $\Delta_2\Lambda_2-P_2M_2$  (inset indicating six  $C_2$ -symmetric pseudo-cubes  $\Delta_2\Lambda_2-M_2$ ).

$\Delta\Delta\Delta\Lambda-P_2M_2$

$C_2$ :

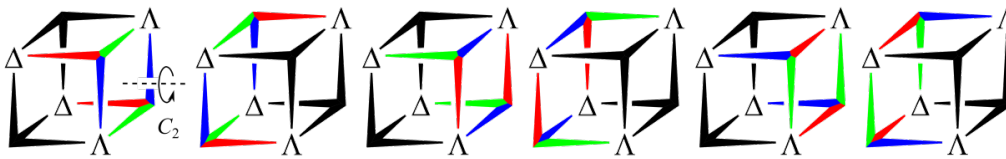

| SE <sup>i</sup> | PG <sup>ii</sup> | Types of painted cubes                  |
|-----------------|------------------|-----------------------------------------|
| E               | (2)(4)           | $\frac{3^2 + 3^1}{1 + 1} \times 6 = 36$ |
| $C_2^1$         | (24)             |                                         |

(i): Symmetry elements (SE); (ii): Permutation groups (PG).

Table S11. Calculation of the potential patterned pseudo-cube  $\Delta_2\Lambda_2-P_2M_2$  (inset indicating 42  $C_2$ -symmetric pseudo-cubes  $\Delta_2\Lambda_2-M_2$ ).

$\Delta\Delta\Delta\Delta-P_2M_2$

$C_1$ :

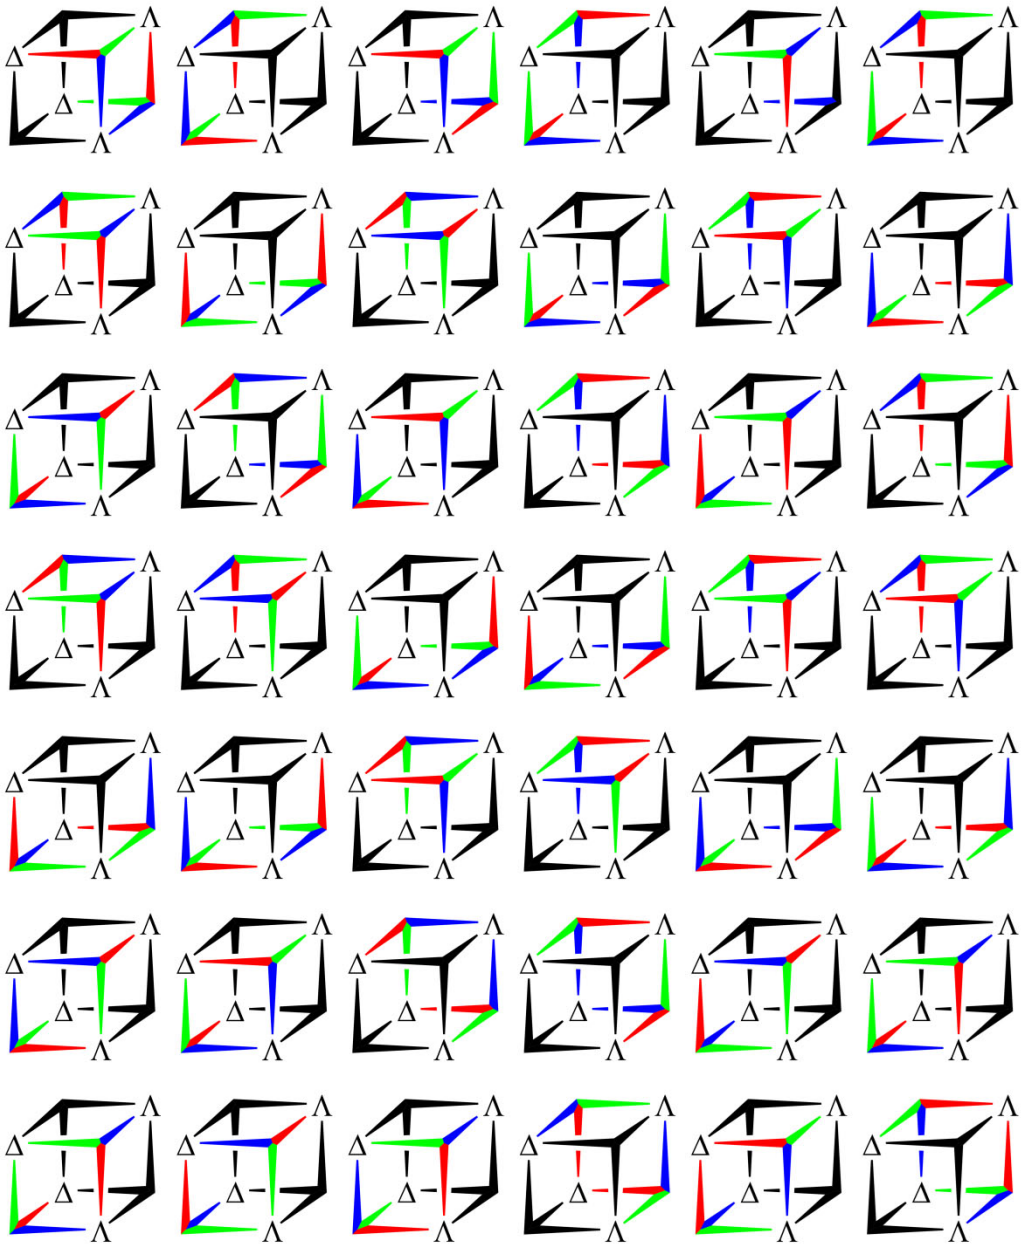

| $SE^i$ | $PG^{ii}$ | Types of painted cubes          |
|--------|-----------|---------------------------------|
| E      | (1)(2)    | $\frac{3^2}{1} \times 42 = 378$ |

(i): Symmetry elements (SE); (ii): Permutation groups (PG).

Table S12. Summary of the isomer number for  $\text{La}_4(\text{C}_1\text{-2})_4$ .

|            | $\Delta_4$ | $\Delta_3\Lambda$ | $\Delta_2\Lambda_2$ | $\Delta\Lambda_3$ | $\Lambda_4$ |
|------------|------------|-------------------|---------------------|-------------------|-------------|
| $M_4$      | 15         | 33                | 45                  | 33                | 15          |
| $M_3P$     | 27         | 162               | 162                 | 162               | 27          |
| $M_2P_2$   | 45         | 162               | 414                 | 162               | 45          |
| $MP_3$     | 27         | 162               | 162                 | 162               | 27          |
| $P_4$      | 15         | 33                | 45                  | 33                | 15          |
| <i>sum</i> | 2190       |                   |                     |                   |             |

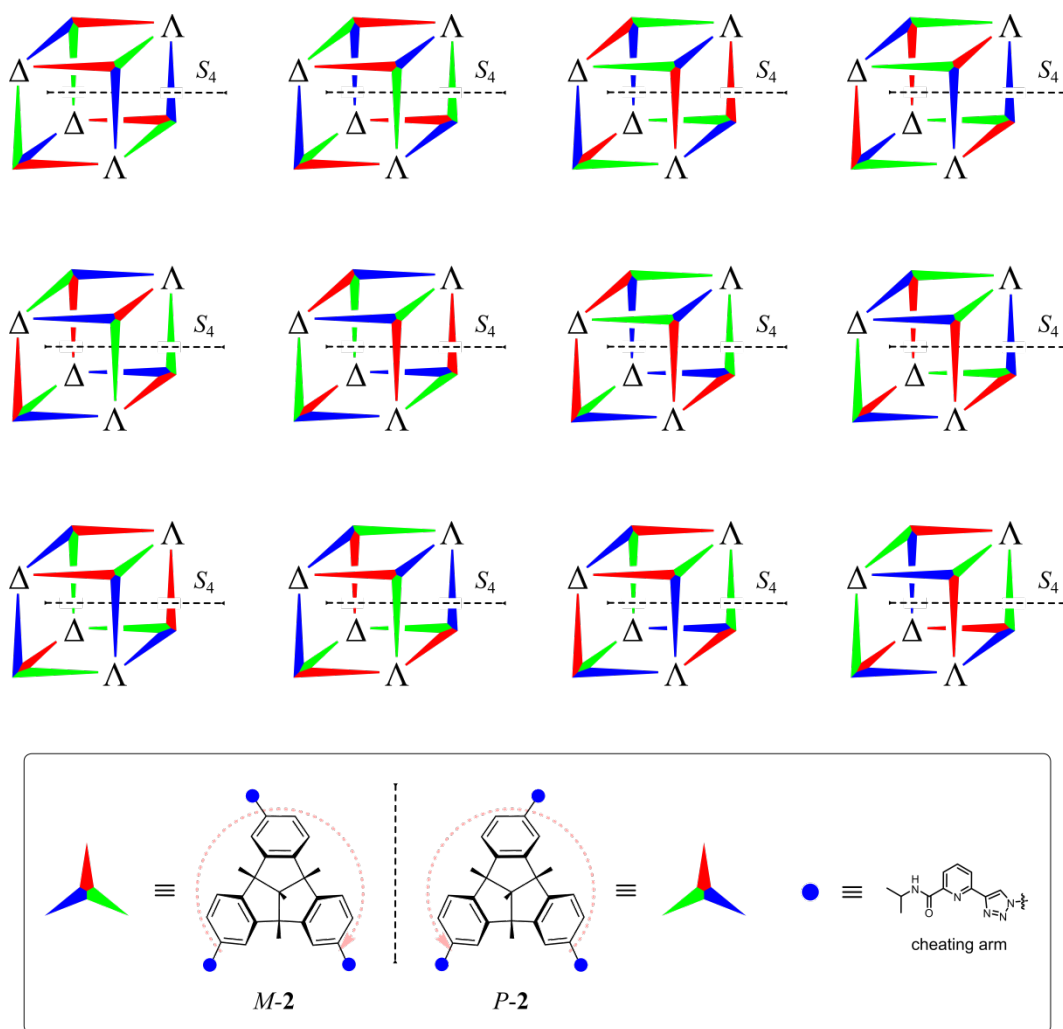

Fig. S111. 12 types of achiral mesomers  $\text{La}_4(\text{C}_1\text{-2})_4$  with  $S_4$  symmetry.

## 7. Volume and Sphericity Calculation

The recognition ability of the host cavity for guest is closely related to the matching degree of volume and shape between them. To determine the molecular volumes ( $V_{mol}$ ) of fullerene guests and the inner cavity volumes of the complexes before and after encapsulation, MoloVol calculations (<https://molovol.com/>)<sup>S54</sup> based on the crystal structures were performed using single probe mode. For fullerene molecules, the program parameters were set as follows: small probe radius: 1.2 Å; grid resolution: 0.2 Å; optimization depth: 4. For cage cavities, the program parameters were set as follows: small probe radius: 2.4 Å; grid resolution: 0.2 Å; optimization depth: 4. Additionally, sphericity<sup>S15</sup> was employed to reflect the shape of host cavity and guest. The concept of sphericity is a measure of how spherical an object is, which is defined as the ratio of the surface area of an equal-volume sphere to the actual surface area of the particle:

$$\psi = \frac{\pi^{1/3}(6V)^{2/3}}{A}$$

Where V is the molecular volume ( $V_{mol}$ ) of fullerene guests or the cavity volume ( $V_c$ ) of cage and A is the probe excluded surface ( $S_{excl}$ ) of fullerene guests and the cage cavity. The detailed calculation results were shown in Table S13.

Table S13. Calculated volumes and sphericities of fullerenes and cages by MoloVol.

| Guest/Cage                                 | $V_{mol}^1 / V_c^2$ (Å <sup>3</sup> ) | $S_{excl}$ (Å <sup>2</sup> ) | $\Psi$ |
|--------------------------------------------|---------------------------------------|------------------------------|--------|
| C <sub>60</sub> ( <i>I<sub>h</sub></i> )   | 561                                   | 385                          | 0.85   |
| C <sub>70</sub> ( <i>D<sub>5h</sub></i> )  | 652                                   | 434                          | 0.84   |
| C <sub>76</sub> ( <i>D<sub>2</sub></i> )   | 835                                   | 536                          | 0.80   |
| C <sub>78</sub> ( <i>C<sub>2v</sub></i> )  | 859                                   | 549                          | 0.80   |
| C <sub>78</sub> ( <i>C<sub>2v</sub>'</i> ) | 861                                   | 550                          | 0.80   |
| <b>T-3</b>                                 | 810                                   | 444                          | 0.95   |
| <b>S<sub>4</sub>-4</b>                     | 1079                                  | 563                          | 0.91   |
| <b>S<sub>4</sub>-4</b> (C <sub>60</sub> )  | 921                                   | 499                          | 0.92   |
| <b>S<sub>4</sub>-4</b> (C <sub>70</sub> )  | 980                                   | 526                          | 0.91   |

Note: <sup>1</sup>Molecular volume of fullerene; <sup>2</sup>Cavity volume of cage.



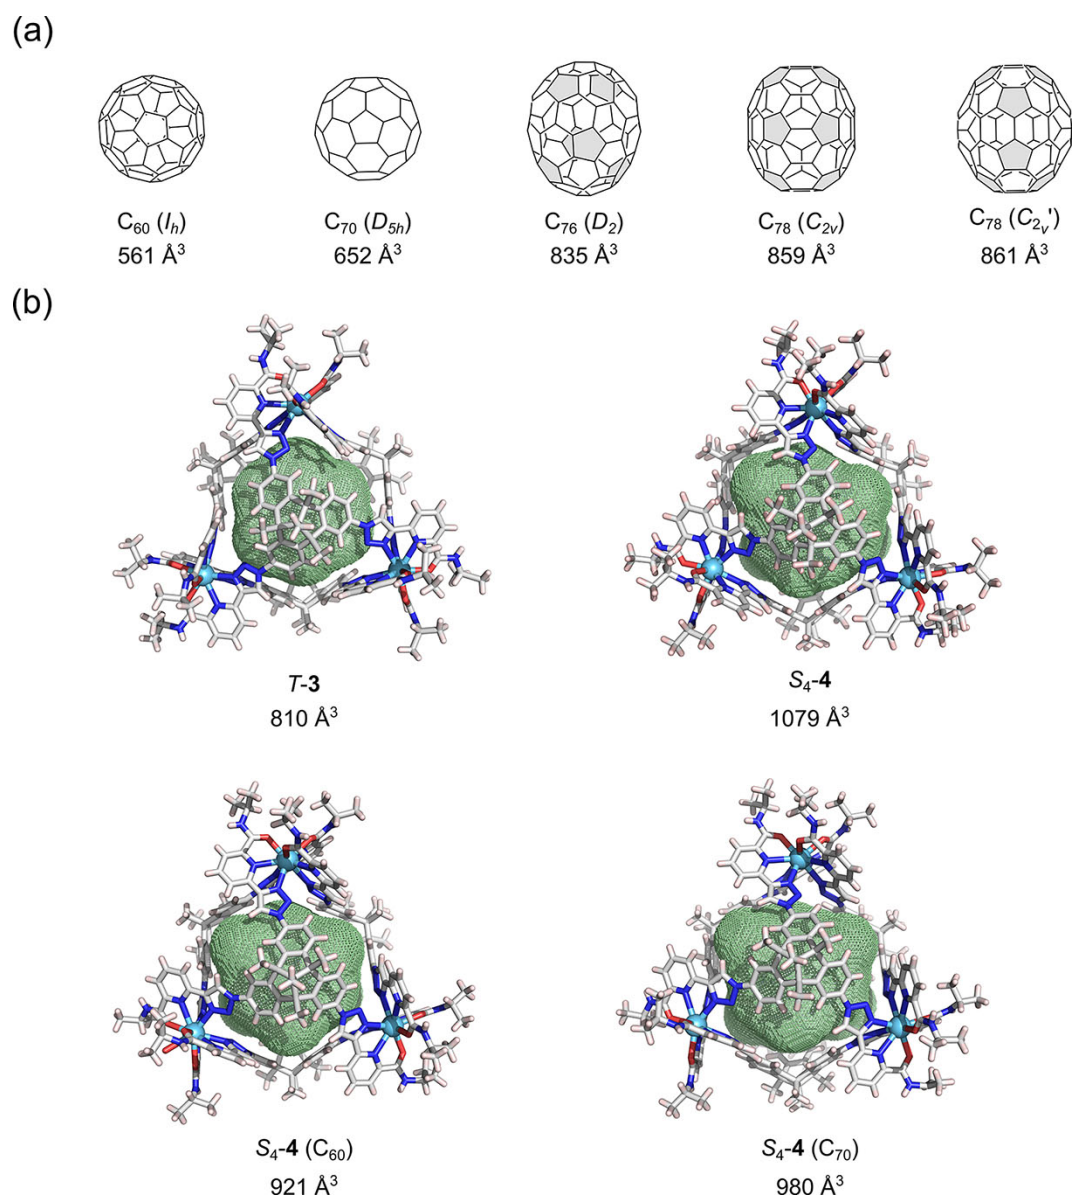

*Fig. S112.* MoloVol-calculated the molecular volumes of fullerene guests (a) and the inner void spaces (pale green mesh) of the pseudo-cubic cages (b) before and after encapsulating fullerene guests.



## 8. Enantioseparation and Configuration Assignment of *P*-1 and *M*-1

### 8.1 Chiral HPLC separation for *C*<sub>3</sub>-1

HPLC analyses were performed on the SHIMADZU LC-20A instrument with a chiral Enantiopak<sup>®</sup>SDMP column (4.6\*250 mm, 5 $\mu$ m). The racemic *C*<sub>3</sub>-1 was dissolved in pure ethanol and injected into the chiral analysis column (Injecting volume: 20  $\mu$ L; Sample concentration: 0.3 mg/mL). The HPLC parameters were set as follows: Mobile phase: n-Hexane/EtOH = 55/45; Flow rate: 1 mL/min; Detecting wavelength: 254 nm.

Using the separation conditions established by HPLC, we further separated the racemic *C*<sub>3</sub>-1 on a Waters Prep 150 LC instrument with a chiral Enantiopak<sup>®</sup>SDMP column (10.0\*250 mm, 5 $\mu$ m; Injecting volume: 2.5 mL; Sample concentration: 2.3 mg/mL) and obtained enantiomers *P*-1 and *M*-1.

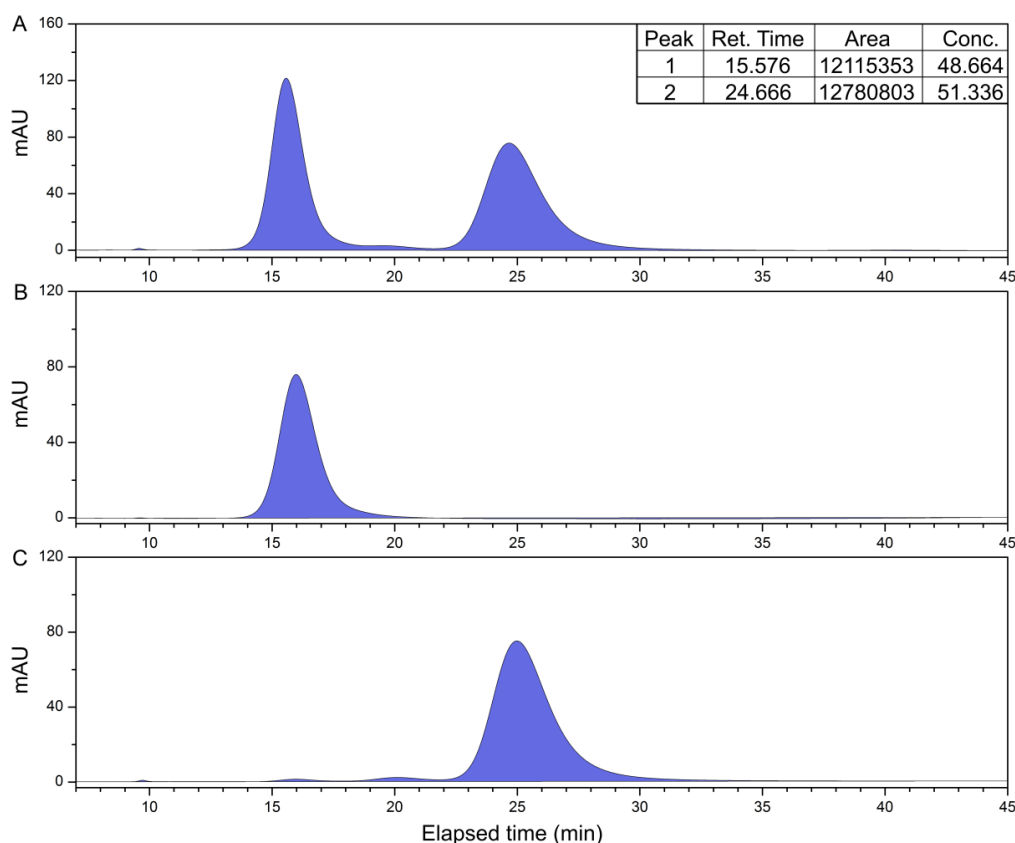

Fig. S113. (A) HPLC of racemic *C*<sub>3</sub>-1. (B) HPLC of first fraction separated by Prep LC. (C) HPLC of second fraction separated by Prep LC.

### 8.2 Circular dichroism

The Circular dichroism (CD) spectra of *P*-1 and *M*-1 were recorded at room temperature on a MOS-450 circular dichroism spectrometer. The sample was dissolved in dichloromethane ( $2.0 \times 10^{-5}$  M) and added into a quartz cell with 0.5 cm optical path length. Before the CD spectrum test, the baseline was corrected under the blank solvent condition.

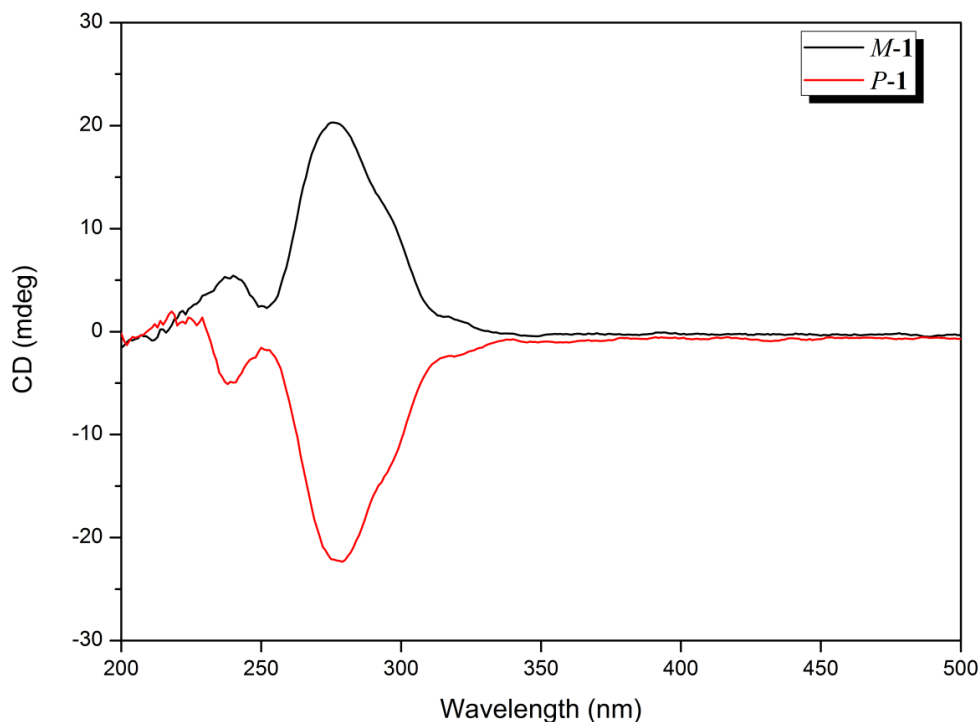

Fig. S114. CD spectra of *P*-1 and *M*-1 in DCM ( $2.0 \times 10^{-5}$  M).

### 8.3 Absolute configuration determination by X-ray crystallography

The crystals of the second fraction of *C*<sub>3</sub>-1 separated by Prep LC were obtained through slow volatilization of the chloroform solution of the ligand, and the X-ray diffraction data were collected on a micro-focus metal jet diffractometer with Ga K $\alpha$  radiation. Data reduction was performed with the CrysAlisPro package,<sup>S2</sup> and the Flack value was found to be 0.04(7), indicating that the absolute configuration *P* confirmed by X-ray diffraction was reliable. On the contrary, the first fraction of *C*<sub>3</sub>-1 can be determined to be of the *M* configuration.

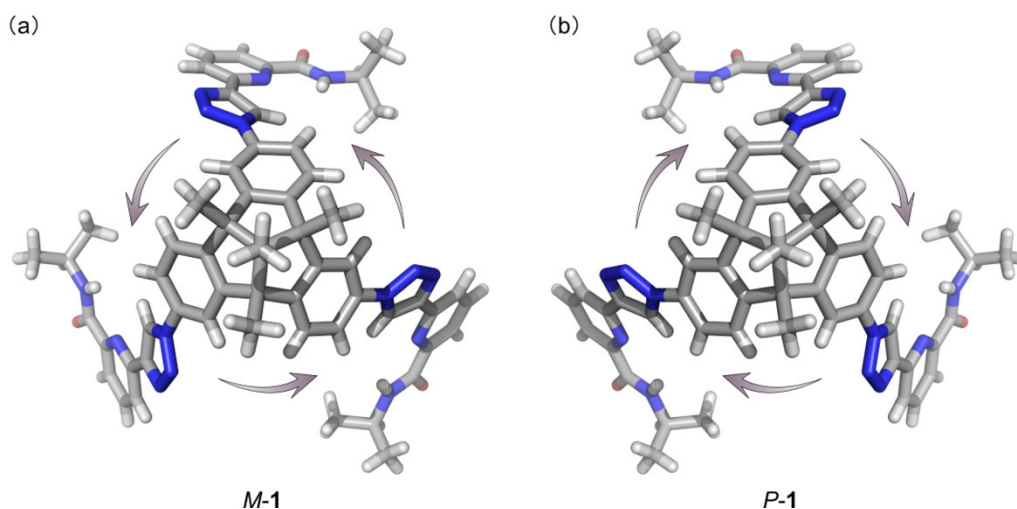

Fig. S115. (a) Energy-minimized structure of the first fraction of *C*<sub>3</sub>-1 with the *M* configuration. (b) Crystal structure of the second fraction of *C*<sub>3</sub>-1 with the *P* configuration (Solvent chloroform was removed for clarity).

## 9. Synthesis and Characterization of Fullerene Isomers

### 9.1 Preparation and isolation

A graphite rod, obtained through core drilling, was filled with graphite powder. Subsequently, the rods underwent annealing in a tube furnace at 1000°C for 12 hours under an argon atmosphere. They were then vaporized in a Krätschmer-Huffman-type fullerene generator, utilizing an arc current of 100 A, and operating under a helium atmosphere at 270 Torr. The resulting fullerene soot was collected and subjected to sonication in carbon disulfide for 1 hour. Following filtration, CS<sub>2</sub> was removed via a rotary evaporator. The remaining solid residue was dissolved in toluene and filtered. The separation and purification of C<sub>76</sub>, C<sub>78</sub>-I, and C<sub>78</sub>-II were accomplished using a multi-stage HPLC process with toluene as the eluent. The initial stage employed a Buckyprep column (20 mm × 250 mm, Cosmosil Nacalai Tesque), and a fraction named Fr3 was collected (Fig. S116a). Fr3 was subsequently injected into another Buckyprep column (20 mm × 250 mm, Cosmosil Nacalai Tesque) for recycling separation, resulting in the final isolation of C<sub>76</sub> (Fr3-1), C<sub>78</sub>-I (Fr3-2), and C<sub>78</sub>-II (Fr3-3) (Fig. S116b). The high purity of these compounds was verified by analytical HPLC chromatograms and mass spectra (Fig. S117).

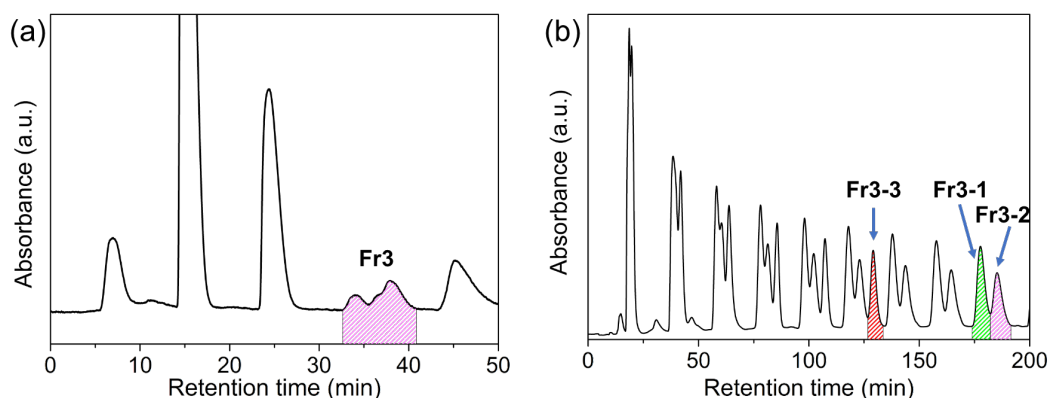

*Fig. S116.* (a) Isolation scheme of fullerene extract on a Buckyprep column. Conditions: 20 mL inject volume; 10 mL/min toluene flow; (b) Recycling HPLC chromatogram of Fr3 on a Buckyprep-M column. Conditions: 10 mL injection volume; 10 mL/min toluene flow. 330 nm detection wavelength.

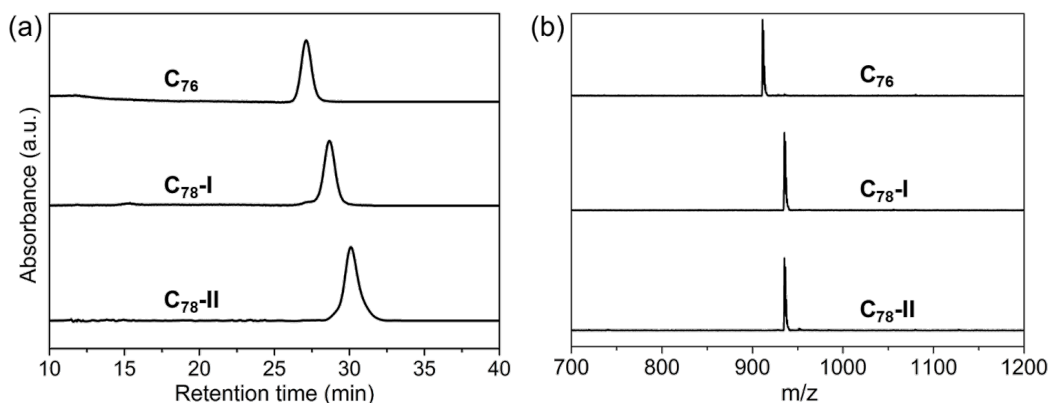

*Fig. S117.* (a) HPLC chromatograms and (b) LDI-TOF mass spectra of  $C_{76}$ ,  $C_{78}$ -I, and  $C_{78}$ -II. HPLC conditions: Buckyprep column ( $\varnothing = 4.6 \times 250$  mm); 20  $\mu$ L injection volume; 1 mL  $\text{min}^{-1}$  toluene flow; 330 nm detection wavelength; 40  $^{\circ}\text{C}$ .

## 9.2 Crystallographic characterizations

Black co-crystals of fullerenes and  $\text{Ni}^{\text{II}}(\text{OEP})$  were obtained by layering a benzene solution of  $\text{Ni}^{\text{II}}(\text{OEP})$  over a  $\text{CS}_2$  solution of the respective fullerenes in a glass tube at 0  $^{\circ}\text{C}$  for 30 days. Single-crystal X-ray data were collected at a temperature of 100 K using a radiation wavelength of 0.71073  $\text{\AA}$  with a MarCCD detector at beamline BL17B in the Shanghai Synchrotron Radiation Facility (SSRF). For absorption corrections, a multi-scan method was employed. The crystal structures were solved using direct methods and refined using SHELXL-2014.<sup>S58</sup> Hydrogen atoms were placed at calculated positions and restrained with isotropic thermal parameters. Crystal data for  $C_{2v}(2)\text{-}C_{78}$  ( $C_{78}$ -I) and  $C_{2v}(3)\text{-}C_{78}$  ( $C_{78}$ -II) can be obtained free of charge from The Cambridge Crystallographic Data Centre with the CCDC reference number 2278920-2278921.

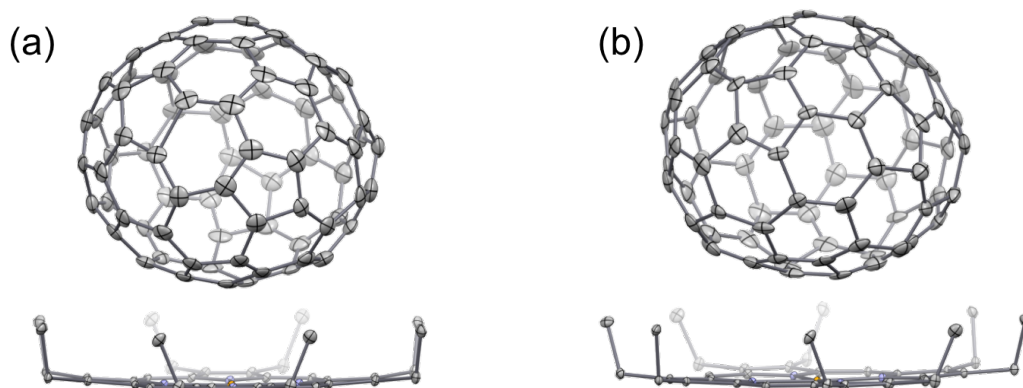

*Fig. S118.* ORTEP drawings of (a)  $C_{2v}(2)\text{-}C_{78}\cdot\text{Ni}^{\text{II}}(\text{OEP})$  and (b)  $C_{2v}(3)\text{-}C_{78}\cdot\text{Ni}^{\text{II}}(\text{OEP})$ . Thermal contours are drawn at the 10 % probability level. Only one fullerene cage is shown, whereas solvent molecules and H atoms are omitted for clarity.

## 10. Comparison of Recognition Sensitivity for Higher Fullerene Isomers

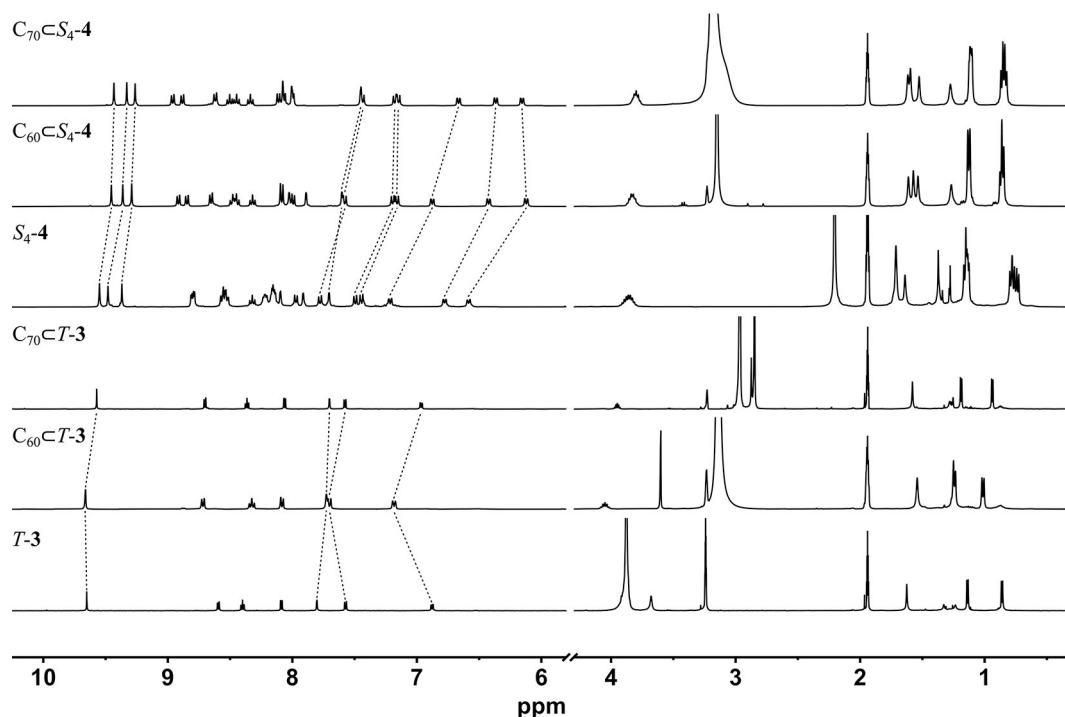

Fig. S119.  $^1\text{H}$  NMR spectra (400 MHz, 298 K) of  $T-3$  ( $\Delta_4-P_4$ ) and  $S_4-4$  before and after encapsulating fullerene, where  $S_4-4$  empty is in a  $\text{CD}_3\text{CN}$  solution, and the others are in a mixed  $\text{CD}_3\text{CN}/\text{CD}_3\text{OD}$  (v/v 4/1) solution.

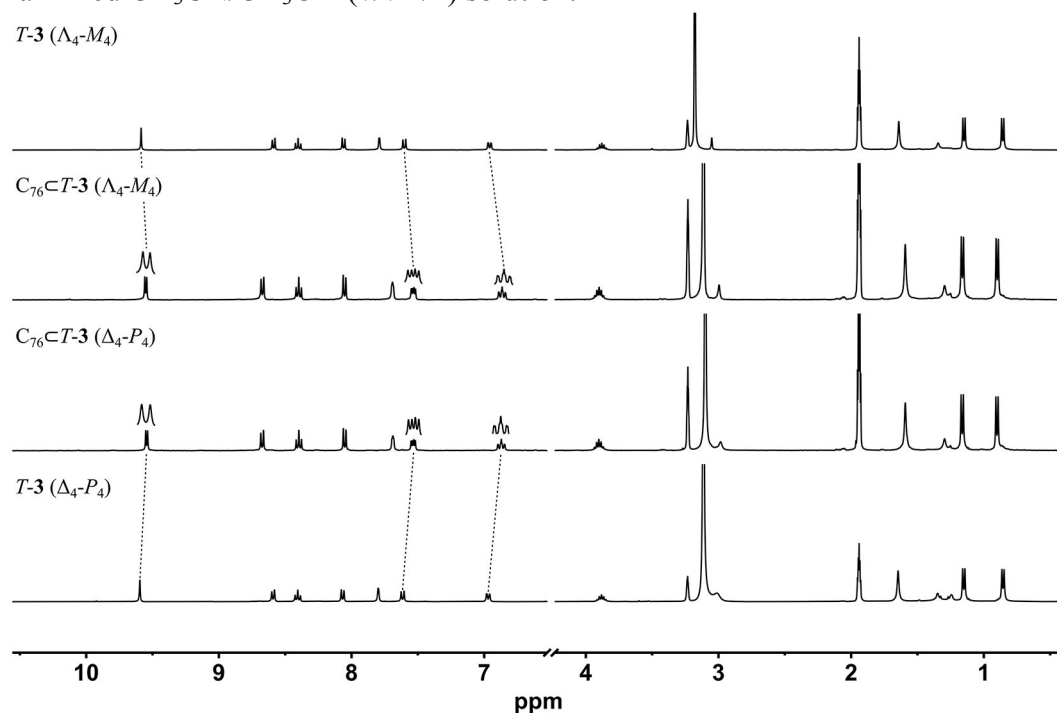

Fig. S120. Comparison of  $^1\text{H}$  NMR spectra (400 MHz, 298 K,  $\text{CD}_3\text{CN}/\text{CD}_3\text{OD}$ , v/v 4/1) for  $T-3$  ( $\Delta_4-P_4/\Lambda_4-M_4$ ) before and after encapsulating  $C_{76}$  ( $D_2$ ).

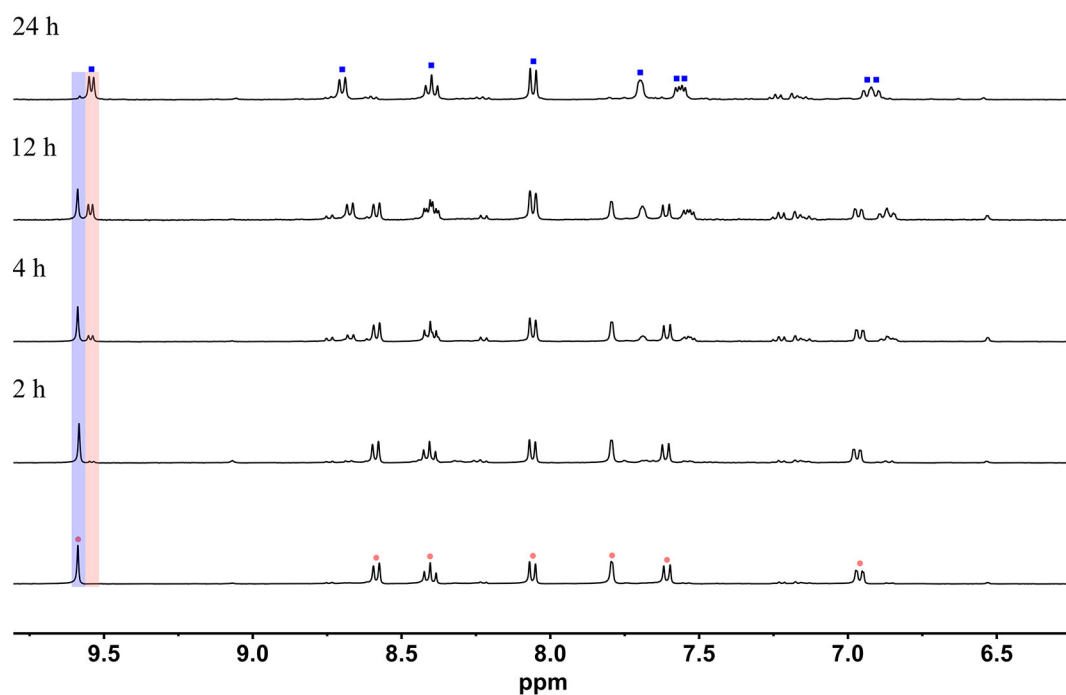

Fig. S121.  $^1\text{H}$  NMR spectra (400 MHz, 298 K,  $\text{CD}_3\text{CN}/\text{CD}_3\text{OD}$ , v/v 4/1) tracking the encapsulation of  $\text{C}_{76}$  by  $T\text{-}3$  ( $\Delta_4\text{-P}_4$ ). (●:  $T\text{-}3$ ; ■:  $\text{C}_{76}\subset T\text{-}3$ )

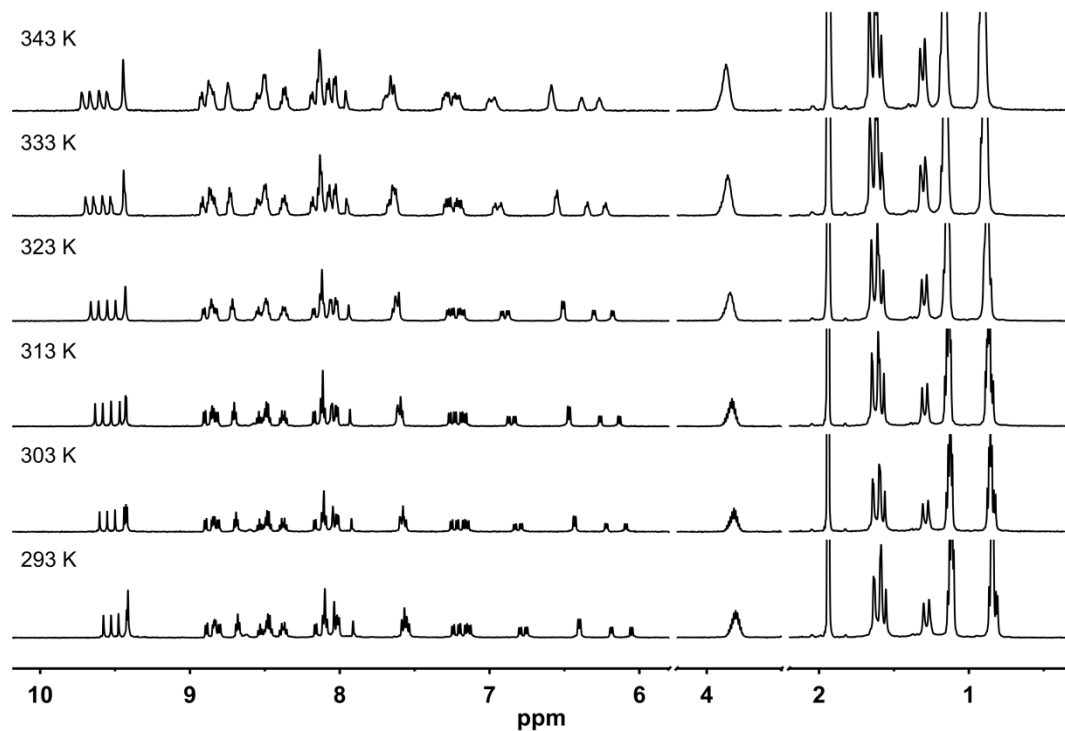

Fig. S122. VT-NMR spectra of  $\text{C}_{76}\subset S_4\text{-}4$  (600 MHz, 293–343 K,  $\text{CD}_3\text{CN}/\text{MeOD} = 4/1$ ). VT-delay is set to 1200 s to ensure that the system reaches equilibrium.

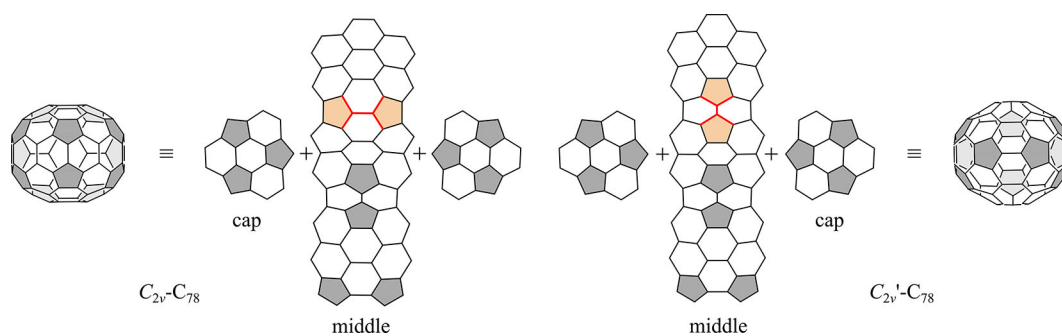

Fig. S123. Comparison of 2D and 3D structures of  $C_{2v}\text{-}C_{78}$  and  $C_{2v}'\text{-}C_{78}$ . The only differences are highlighted in red.

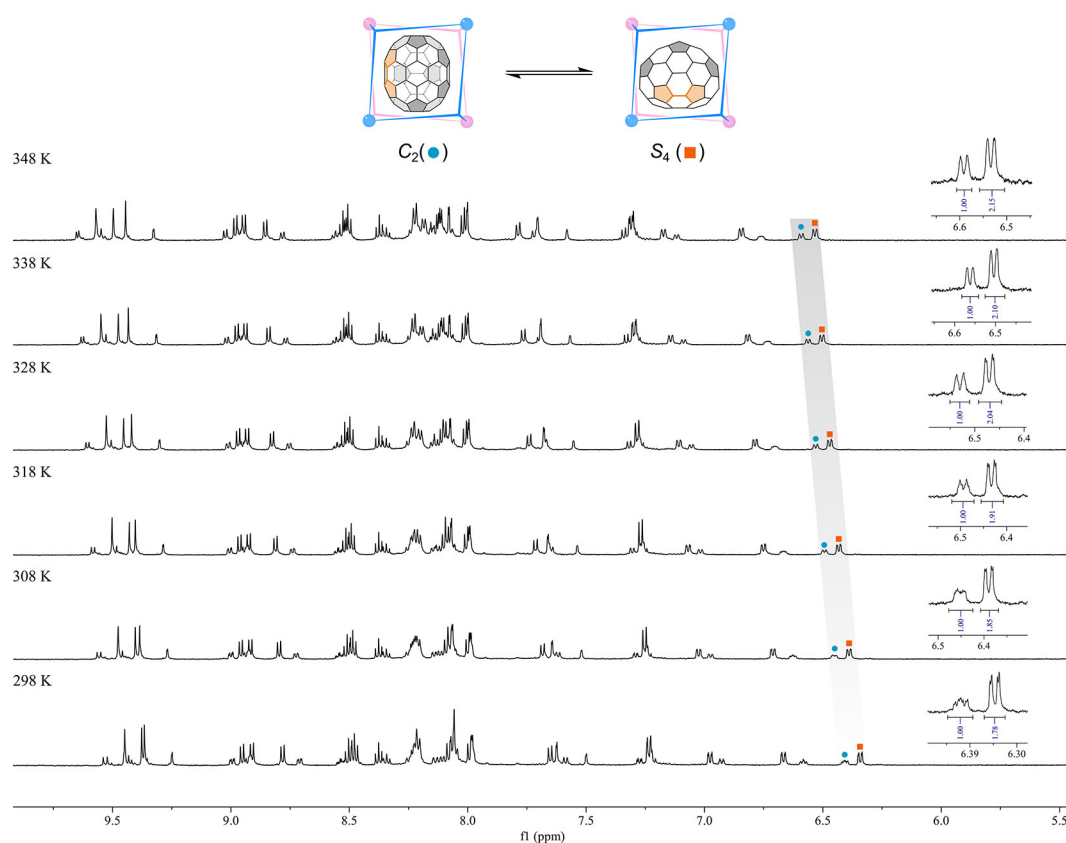

Fig. S124. VT-NMR stack plot (600 MHz,  $\text{CD}_3\text{CN}$ ,  $[C_{2v}\text{-}C_{78}\text{C}S_4\text{-4}] = 1.0 \text{ mM}$ ) showing the effect of temperature on the equilibrium of  $C_{2v}\text{-}C_{78}\text{C}S_4\text{-4} (C_2) \rightleftharpoons C_{2v}\text{-}C_{78}\text{C}S_4\text{-4} (S_4)$ . The proton signals on the TBTQ skeletons of  $C_2$ -symmetric  $C_{2v}\text{-}C_{78}\text{C}S_4\text{-4} (\bullet)$  and  $S_4$ -symmetric  $C_{2v}\text{-}C_{78}\text{C}S_4\text{-4} (\blacksquare)$  were integrated to determine the relative content. It can be observed that increase in temperature is conducive to the formation of  $S_4$ -symmetric  $C_{2v}\text{-}C_{78}\text{C}S_4\text{-4}$ .

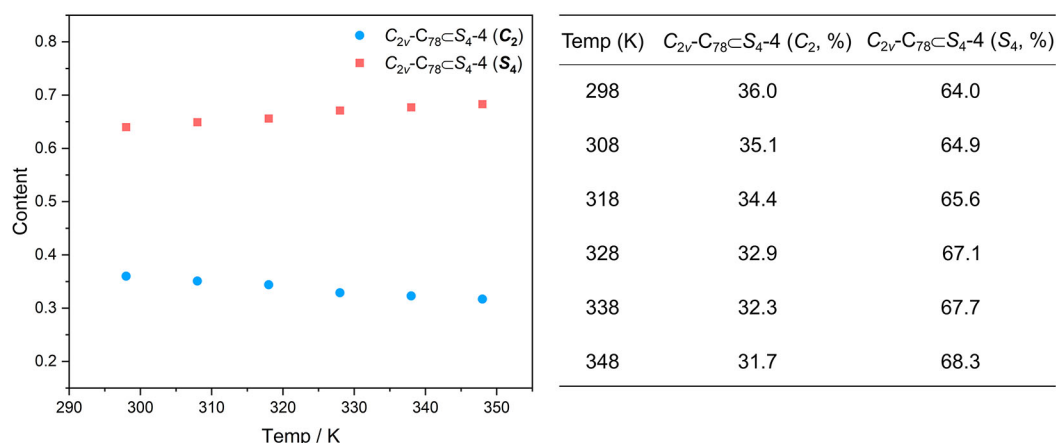

Fig. S125. Distribution plots (left) and table (right) of  $C_2$ -symmetric  $C_{2v}\text{-}C_{78}\text{S}_4\text{-4}$  and  $S_4$ -symmetric  $C_{2v}\text{-}C_{78}\text{S}_4\text{-4}$  at various temperatures. The molar fractions at each temperature were calculated by  $^1\text{H}$  NMR integral ratios for the proton signals on the TBTQ skeletons.

The thermodynamic parameters for the equilibrium of  $C_{2v}\text{-}C_{78}\text{S}_4\text{-4}$  ( $C_2$ )  $\rightleftharpoons$   $C_{2v}\text{-}C_{78}\text{S}_4\text{-4}$  ( $S_4$ ) can be obtained based upon van't Hoff equation:

$$\ln K = -\frac{\Delta H}{RT} + \frac{\Delta S}{R} \quad (1)$$

According to VT-NMR spectra, the equilibrium constant ( $K$ ) at various temperature can be calculated by integral ratios. There is a linear relationship between  $1/T$  and  $\ln K$  in equation 1. Therefore, the slope and intercept of the line can be obtained, and then corresponding thermodynamic parameters for encapsulation equilibrium are calculated as follows.

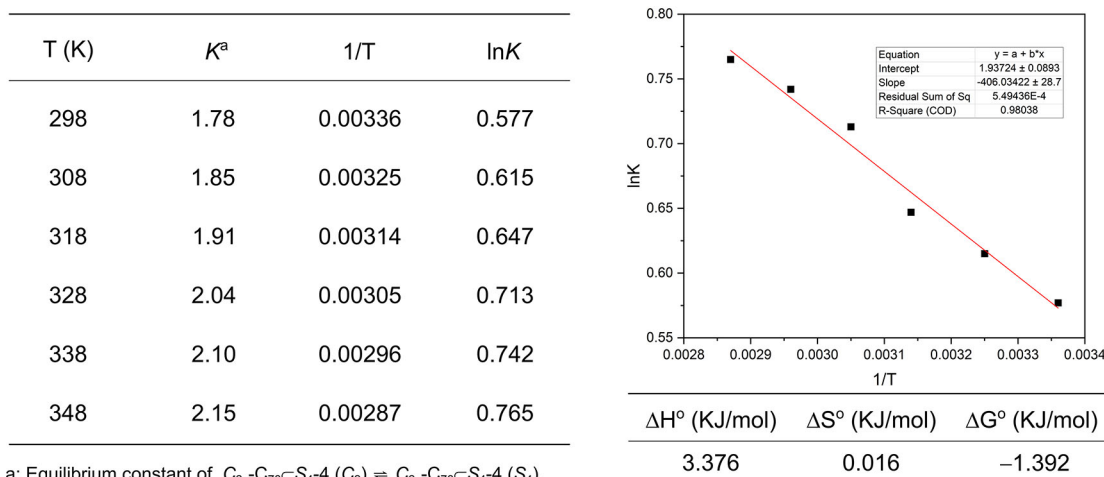

a: Equilibrium constant of  $C_{2v}\text{-}C_{78}\text{S}_4\text{-4}$  ( $C_2$ )  $\rightleftharpoons$   $C_{2v}\text{-}C_{78}\text{S}_4\text{-4}$  ( $S_4$ ).

Fig. S126. Left: Data for the equilibrium of  $C_{2v}\text{-}C_{78}\text{S}_4\text{-4}$  ( $C_2$ )  $\rightleftharpoons$   $C_{2v}\text{-}C_{78}\text{S}_4\text{-4}$  ( $S_4$ ) from VT-NMR. Right: The linear fitting of  $1/T$  vs.  $\ln K$  based on the van't Hoff equation and the calculated thermodynamic parameters of  $\Delta H^\circ$ ,  $\Delta S^\circ$  and  $\Delta G^\circ$  (298 K).



## 11. Orientation Analysis of Host–Guest Complexes

### 11.1 Theoretical calculation of binding energy

To evaluate the potential relative orientation of *S*<sub>4</sub>-**4** with respect to higher fullerenes (*D*<sub>2</sub>-C<sub>76</sub>, *C*<sub>2v</sub>-C<sub>78</sub>, and *C*<sub>2v</sub>'-C<sub>78</sub>), we performed binding energy (BE) calculations on the host – guest complexes using the forcite module in Materials Studio 7.0 by Accelrys software, Inc. The structures of these host – guest complexes were simulated by molecular mechanic modeling, utilizing the crystal data of C<sub>70</sub>⊂*S*<sub>4</sub>-**4** and fullerenes. The theoretical BE for each host – guest complex can be calculated by determining the energy of the host (*E*<sub>H</sub>) after removing the guest and the energy of guest (*E*<sub>G</sub>) after removing the host, followed by calculating the total energy of the host – guest complex (*E*<sub>HG</sub>). Subsequently, the BE can be determined using the equation:  $BE = E_{HG} - (E_H + E_G)$ .

### 11.2 Binding energy of *D*<sub>2</sub>-C<sub>76</sub>⊂*S*<sub>4</sub>-**4**

Affected by the host–guest interaction, the encapsulated host often experiences inevitable chemical shifts and even a reduction in symmetry, particularly when encapsulating guest molecules with lower symmetry. <sup>1</sup>H NMR analysis revealed that the proton signals of *S*<sub>4</sub>-**4**, upon encapsulating *D*<sub>2</sub>-C<sub>76</sub>, transitioned from the original *S*<sub>4</sub> symmetry to *C*<sub>2</sub> symmetry, indicating restricted free rotation of *D*<sub>2</sub>-C<sub>76</sub> within the confined microenvironment of *S*<sub>4</sub>-**4**. *D*<sub>2</sub>-C<sub>76</sub> has three perpendicular *C*<sub>2</sub> axes and varying sizes along these axes (*a*: 8.57 Å; *b*: 7.47 Å; *c*: 6.62 Å, excluding the van der Waals radii of carbon atoms). It can be inferred that one of the *C*<sub>2</sub> axes in *D*<sub>2</sub>-C<sub>76</sub> aligns with the *S*<sub>4</sub> axis of *S*<sub>4</sub>-**4**, resulting in the host – guest complex exhibiting *C*<sub>2</sub> symmetry. For comparison, three potential scenarios were simulated, and the corresponding binding energies were calculated as follows.

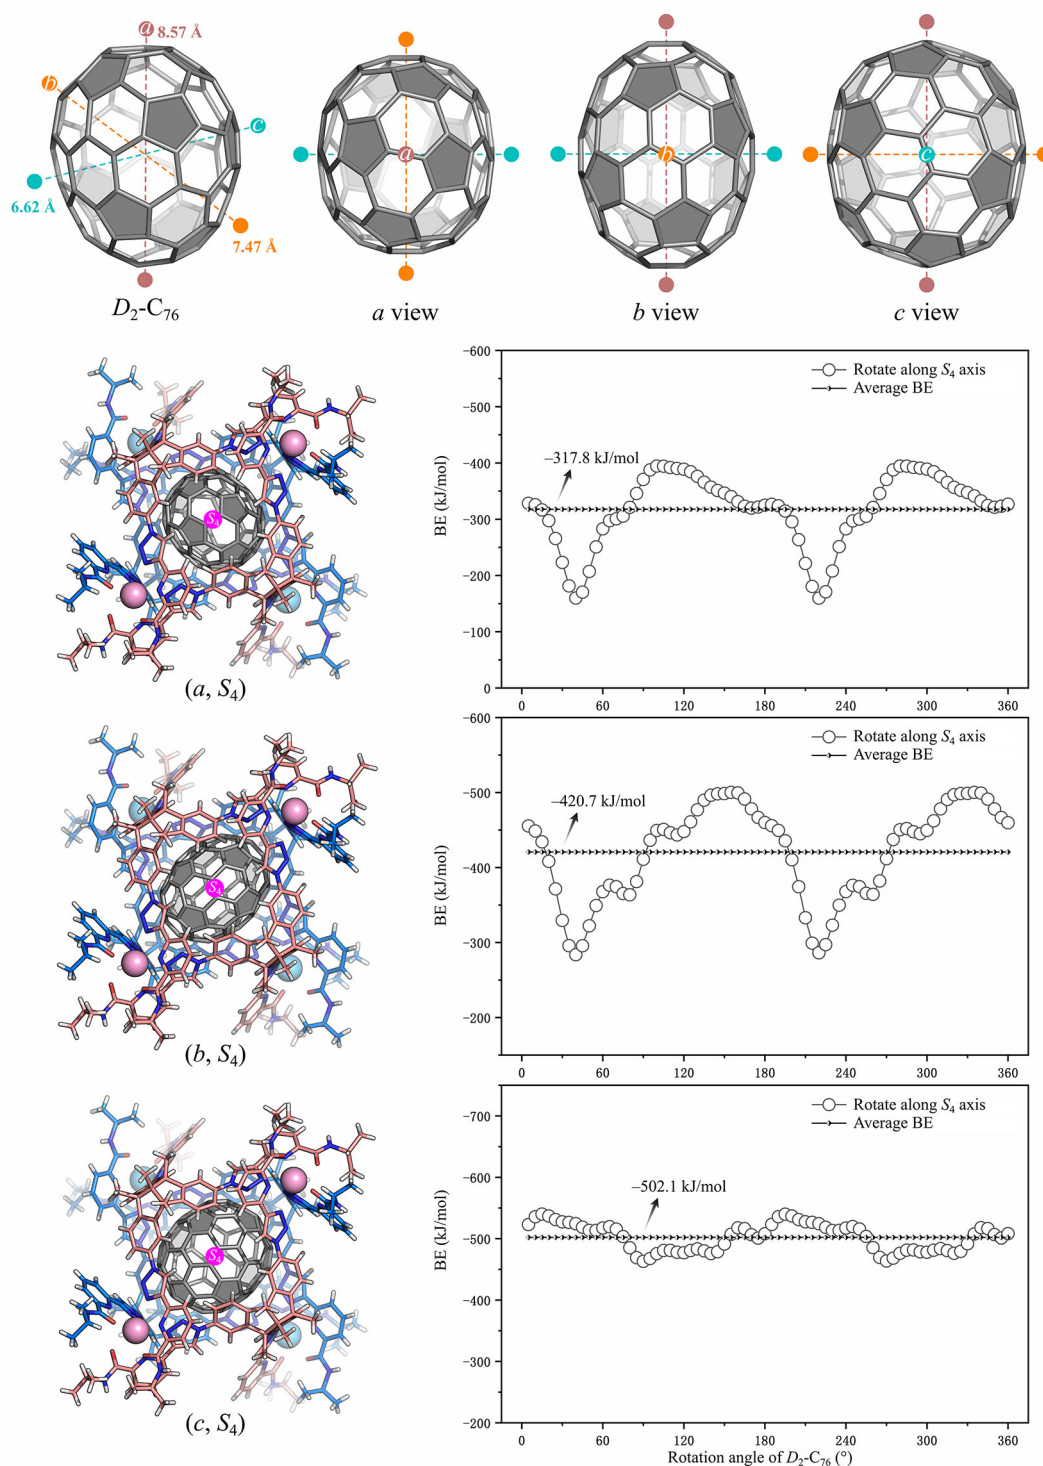

Fig. S127. (a) Different views of the crystal structure for  $D_2$ - $C_{76}$  reported in the literature.<sup>S16</sup> (b) The theoretical BE vs. rotation angle of  $D_2$ - $C_{76}$  for three relative orientations between  $D_2$ - $C_{76}$  and  $S_4$ -4.

### 11.3 Binding energy of $C_{2v}$ - $C_{78} \subset S_4$ -4

$^1\text{H}$  NMR analysis of  $C_{2v}$ - $C_{78} \subset S_4$ -4 revealed two sets of signals with distinct  $C_2$  and  $S_4$  symmetries.  $C_{2v}$ - $C_{78}$  possesses the symmetry elements  $E$ ,  $C_2$  ( $d$ ), and two vertical mirror planes  $\sigma_1$  and  $\sigma_2$ . If the  $C_2$  axis coincides with the  $S_4$  axis of the host, it is plausible

that the complex would exhibit an overall  $C_2$  symmetry, akin to that of  $C_{76}\subset S_4$ -4. Alternatively, one of the two mirrors could be perpendicular to the  $S_4$  axis of the host, allowing the complex to exhibit  $S_4$  symmetry. For comparison, three potential scenarios were simulated, and the corresponding binding energies were calculated as follows.

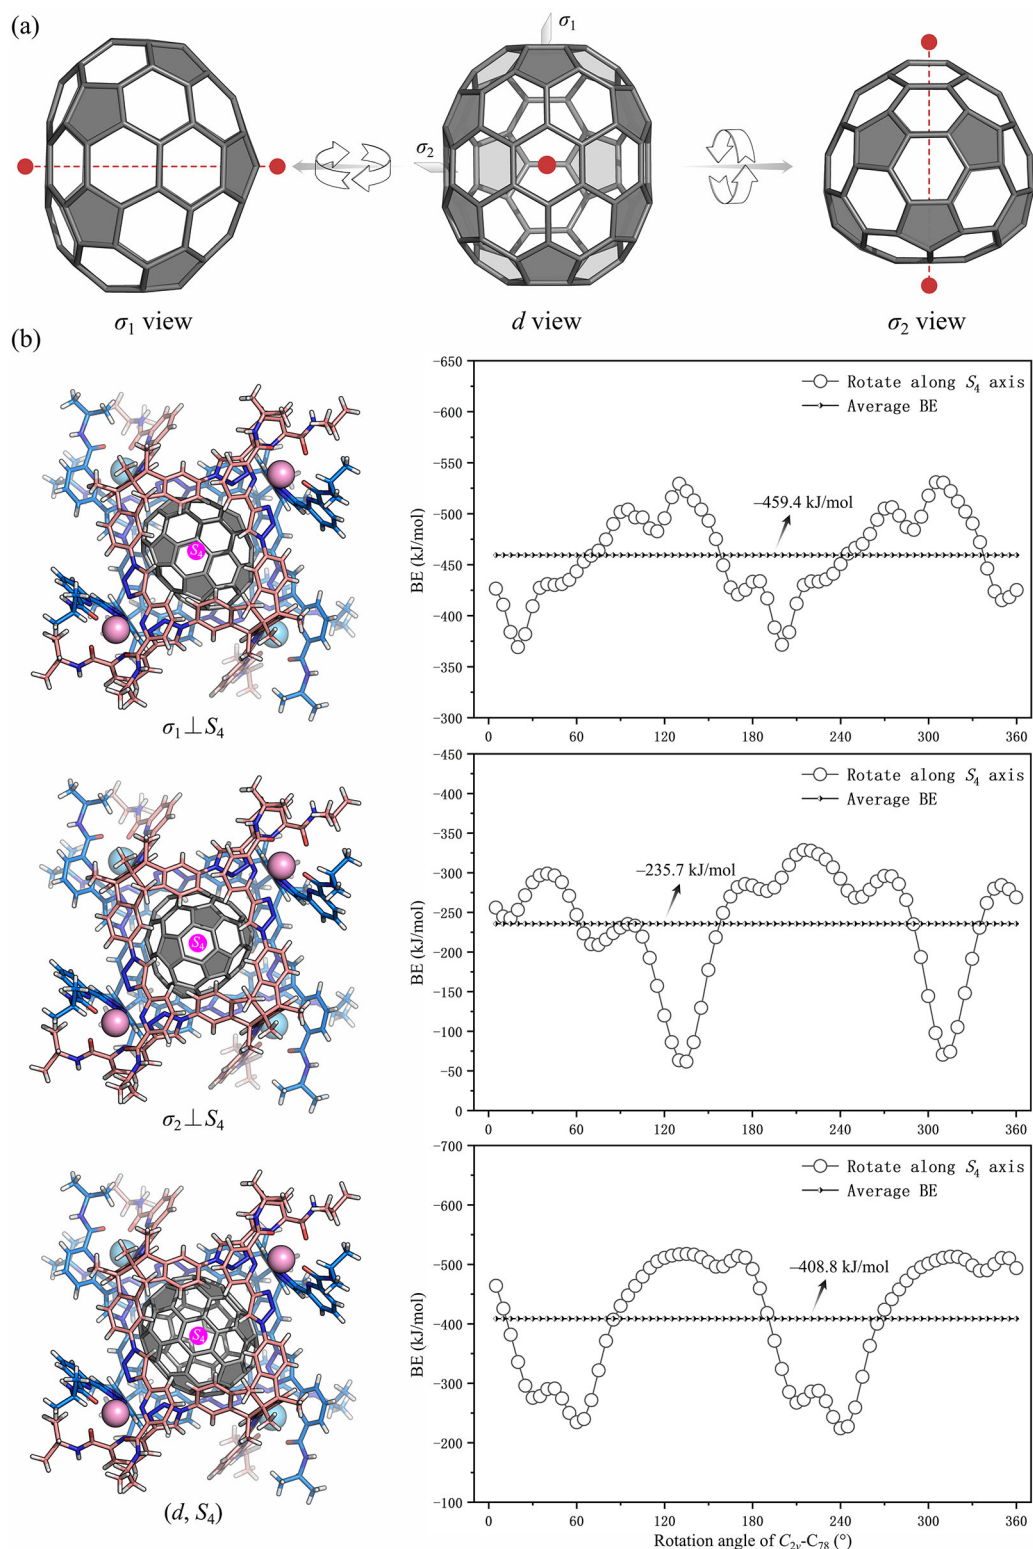

Fig. S128. (a) Three views of the crystal structure for  $C_{2v}$ - $C_{78}$ . (b) The theoretical BE vs. rotation angle of  $C_{2v}$ - $C_{78}$  for three possible combinations of  $C_{2v}$ - $C_{78}\subset S_4$ -4.

## 11.4 Binding energy of $C_{2v}'\text{-}C_{78}\subset S_4\text{-4}$

Similar to the analysis of the relative orientation in  $C_{2v}\text{-}C_{78}\subset S_4\text{-4}$ , three scenarios for  $C_{2v}'\text{-}C_{78}\subset S_4\text{-4}$  were simulated, and the corresponding binding energies were calculated as follows.

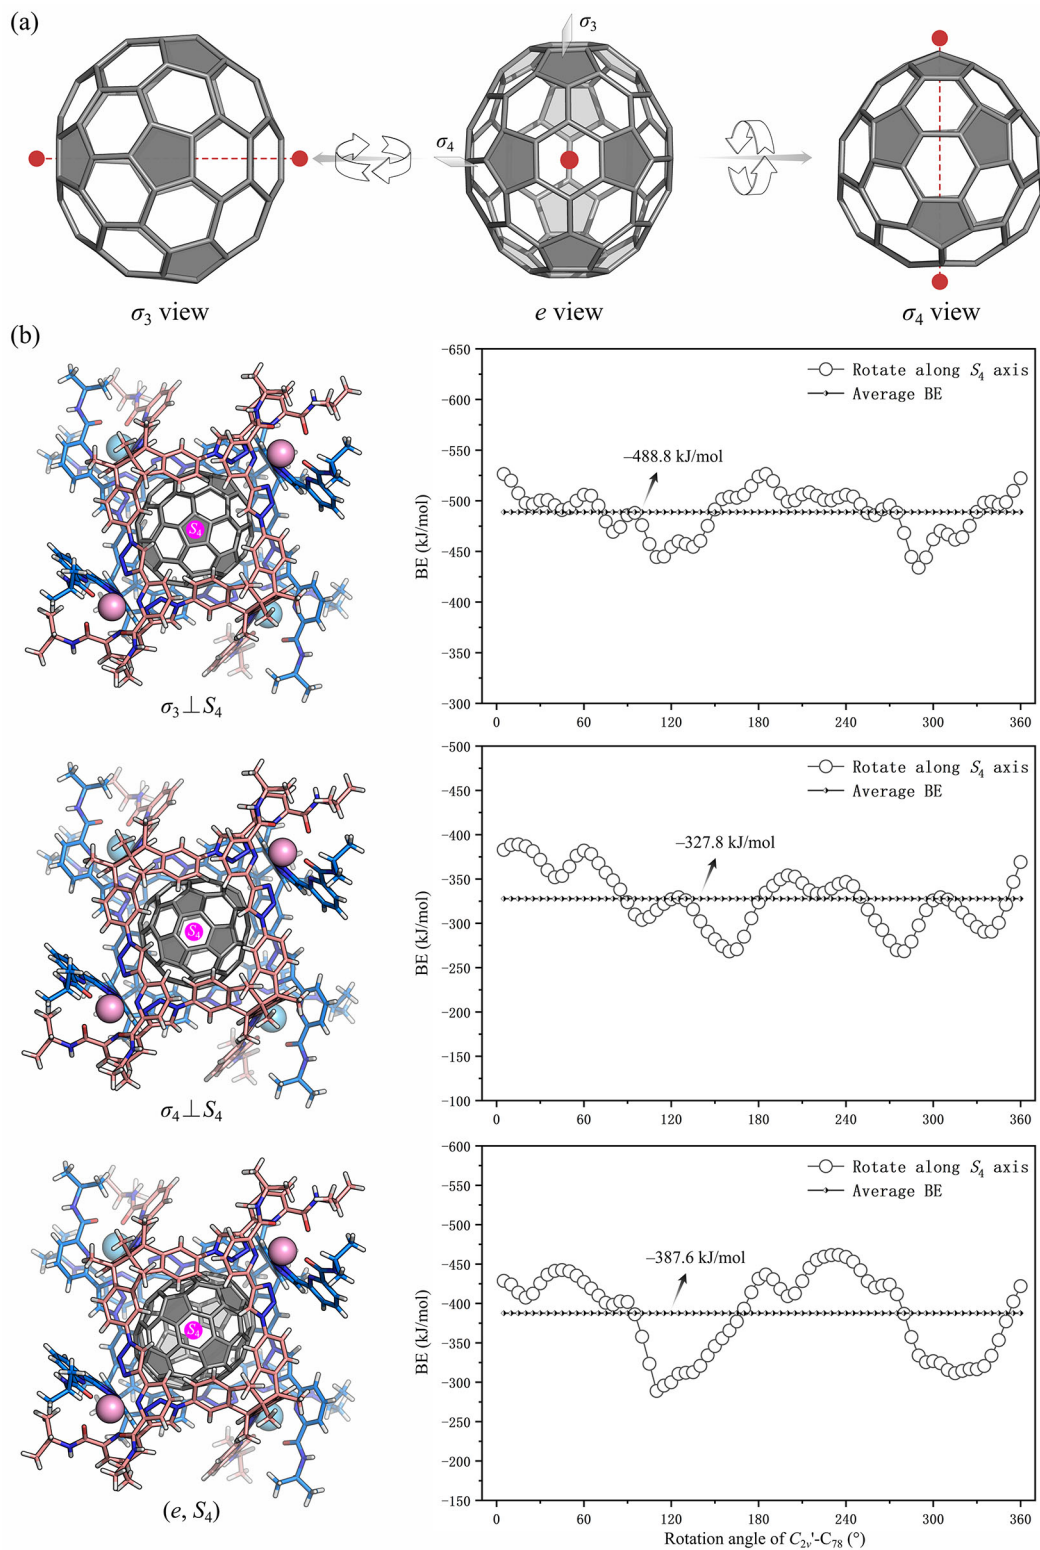

Fig. S129. (a) Three views of the crystal structure for  $C_{2v}'\text{-}C_{78}$ . (b) The theoretical BE vs. rotation angle of  $C_{2v}'\text{-}C_{78}$  for three possible combinations of  $C_{2v}'\text{-}C_{78}\subset S_4\text{-4}$ .

## 12. Analysis of Host–Guest Interactions

### 12.1 Quantitative analysis of host–guest interactions with Hirshfeld surfaces

To quantitatively assess and visually analyze the supramolecular interactions within the crystal structures of  $C_{60} \subset S_4\text{-4}$  and  $C_{70} \subset S_4\text{-4}$ , Hirshfeld surfaces analyses<sup>S17,S18</sup> were performed employing the CrystalExplorer software.<sup>S19</sup> The normalized contact distance ( $d_{norm}$ ), which is based on  $d_e$ ,  $d_i$ , and the van der Waals (*vdw*) radii of the atoms, given by Eq. (1), enables the identification of regions that hold particular importance to intermolecular interactions.<sup>S20</sup> Where  $d_e$  and  $d_i$  correspond to the nearest distances from points on the surface to external and internal atoms, respectively. The combination of  $d_e$  and  $d_i$  values in the form of a 2D fingerprint plot summarizes intermolecular contacts present in the crystal structure. During the calculation process, the fullerene guest molecules are selected and included in the surface.

$$d_{norm} = \frac{d_i - r_i^{vdw}}{r_i^{vdw}} + \frac{d_e - r_e^{vdw}}{r_e^{vdw}} \quad (2)$$

The Hirshfeld surfaces mapped with  $d_{norm}$  are illustrated in Fig. S130-S131, exhibiting the close intermolecular contacts near the guest molecules. The interaction between the host  $S_4\text{-4}$  and fullerene guests is clearly discernible on the Hirshfeld surfaces, manifesting as the bright white regions (Fig. S130b and S131b). The intermolecular interactions appear as distinct spikes in the 2D fingerprint plots (Fig. S130d and S131d). The C $\cdots$ C (~37%) and C $\cdots$ N (~23%) contacts are derived from the  $\pi\cdots\pi$  stacking interaction of fullerenes with TBTQ skeletons and triazole groups, respectively. Notably, this  $\pi\cdots\pi$  stacking interaction plays a pivotal role, constituting a significant portion (~ 60%) of the host–guest interaction. Following this, the CH $\cdots\pi$  (C $\cdots$ H contact, ~18%) interactions and the OTf $\cdots\pi$  interactions (involving C $\cdots$ O and C $\cdots$ F contacts, ~22%) contribute to the overall interaction.



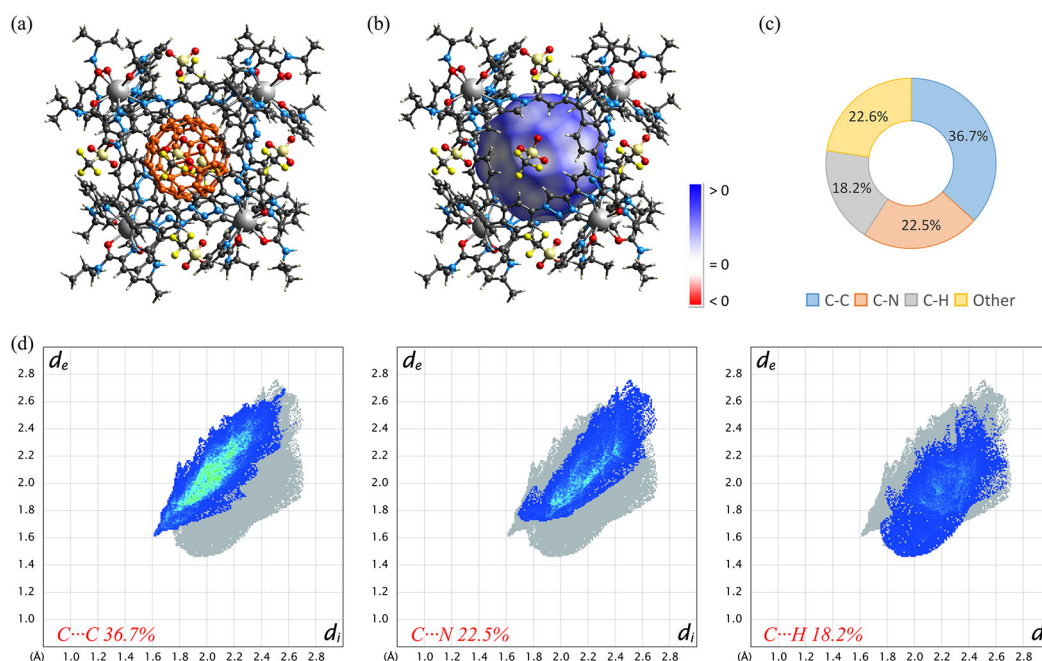

**Fig. S130.** (a) Crystal structure of  $C_{60}@S_4-4$ . (b) Hirshfeld surface of  $C_{60}@S_4-4$  mapped with  $d_{\text{norm}}$  showing the close intermolecular contacts near the guest  $C_{60}$  (Colour scheme: red highlights shorter contacts, white is used for contacts around the  $vdw$  separation, and blue is for longer contacts). (c) Relative contribution to the Hirshfeld surface for the various contacts between host  $S_4-4$  and guest  $C_{60}$ . (d) 2D fingerprint plots for  $C_{60}@S_4-4$  resolved into  $C\cdots C$  (left),  $C\cdots N$  (middle), and  $C\cdots H$  (right) contacts.

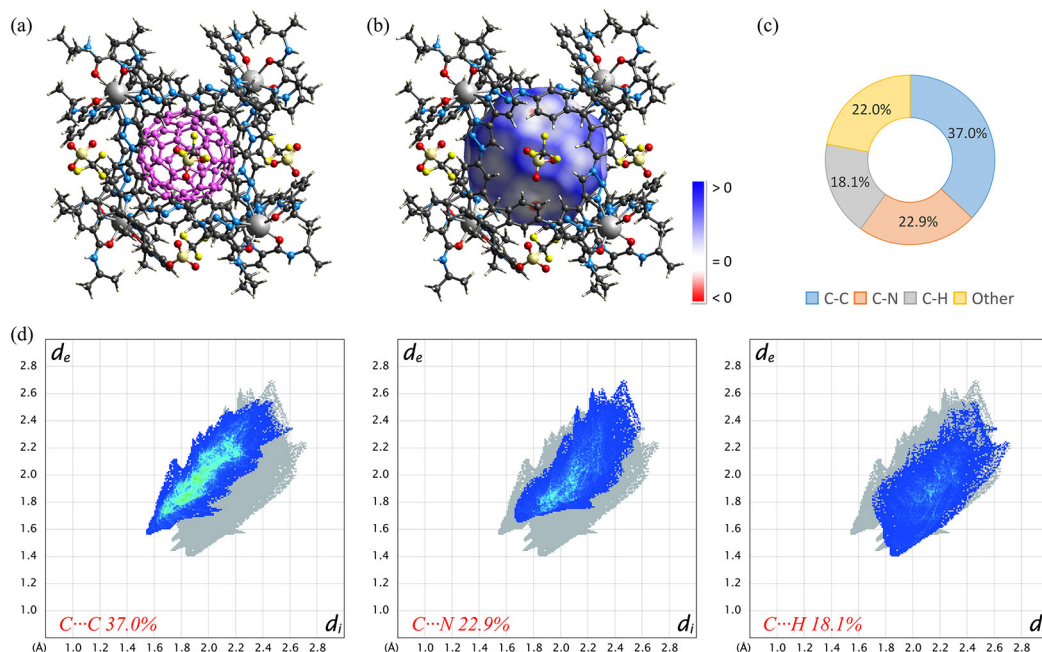

**Fig. S131.** (a) Crystal structure of  $C_{70}@S_4-4$ . (b) Hirshfeld surface of  $C_{70}@S_4-4$  mapped with  $d_{\text{norm}}$  showing the close intermolecular contacts near the guest  $C_{70}$ . (c) Relative contribution to the Hirshfeld surface for the various contacts between host  $S_4-4$  and guest  $C_{70}$ . (d) 2D fingerprint plots for  $C_{70}@S_4-4$  resolved into  $C\cdots C$  (left),  $C\cdots N$  (middle), and  $C\cdots H$  (right) contacts.

## 12.2 Host–guest interactions analysis with IGM

The independent gradient model (IGM) analysis<sup>S21</sup> was conducted using the Multiwfn 3.8 program<sup>S22</sup> to explore the weak interactions between the host and guest. During the calculation process, the host–guest complex is split into two fragments (host and guest) to study their interactions. The contribution degree of atomic pair and atoms to the weak interaction is quantified as a percentage using the  $\delta g$  index. The molecular structure diagram, depicting the color-coded atomic  $\delta g$  index and  $\delta g_{inter}$  isosurface, was generated using the VMD 1.9.3 program.<sup>S23</sup> The color scale, ranging from red to orange (-0.8 to 0.2), effectively visualizes the  $\delta g$  index variations among different atoms. The smaller value of  $\delta g_{inter}$  isosurface is set to ensure the ideal visualization of the *vdw* interaction between the host and guest.

Hence, it is intuitively evident that the pseudo-cube cage exhibits apparent host–guest interactions with fullerene according to the IGM analysis. These interactions primarily originate from the  $\pi\cdots\pi$  stacking and C-H $\cdots\pi$  interactions of TBTQ and triazole groups (highlighted in red) with the fullerenes. In the case of  $C_{60}\subset T\text{-}3$ , the isosurface of  $\delta g_{inter}$  displays high symmetry, aligning with the *T*-symmetric host. In contrast, the symmetry of the  $\delta g_{inter}$  isosurface in  $C_{60}\subset S_4\text{-}4$  is relatively lower, ascribed to the  $S_4$ -symmetric host.

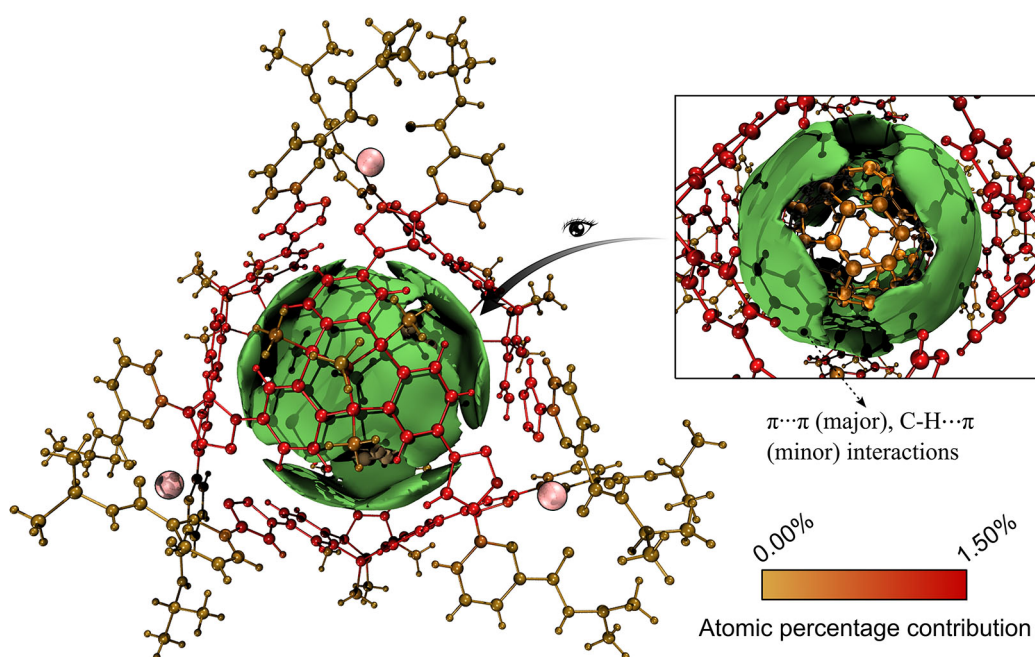

*Fig. S132.* IGM analysis for the simulated structure of  $C_{60}\subset T\text{-}3$  showing the  $\pi\cdots\pi$  stacking and C-H $\cdots\pi$  interactions between host and guest ( $\delta g_{inter} = 0.0012$ ). The percentage contribution of atomic pairs and atoms to the host–guest interactions is demonstrated by different colors.

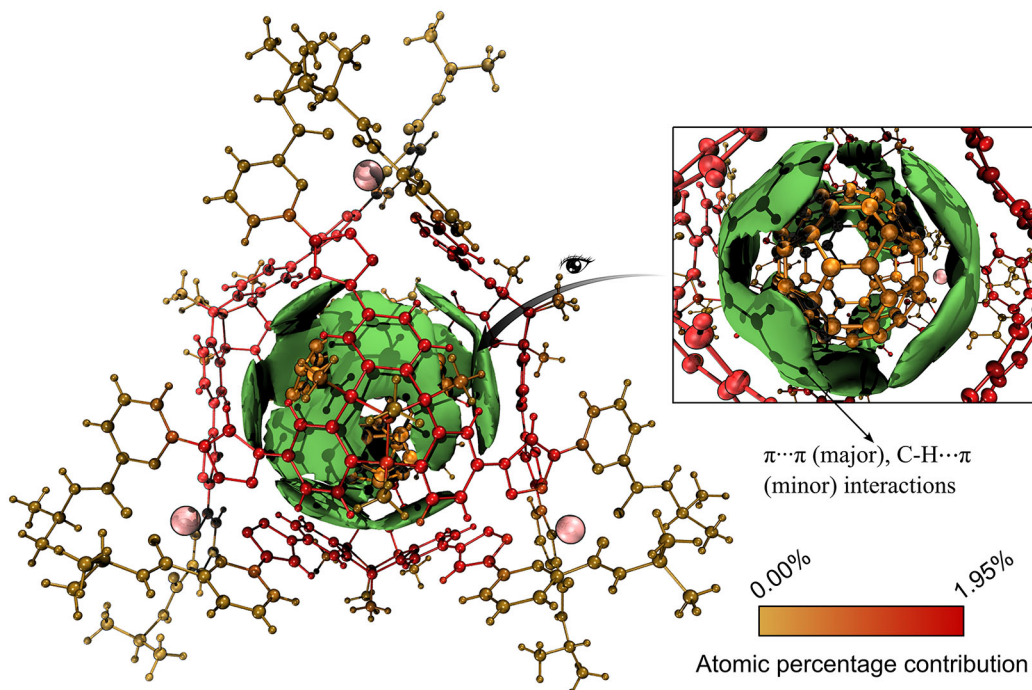

Fig. S133. IGM analysis for the crystal structure of  $C_{60}\subset S_4-4$  showing the  $\pi\cdots\pi$  stacking and C-H $\cdots\pi$  interactions between host and guest ( $\delta g_{inter} = 0.0015$ ). The percentage contribution of atomic pairs and atoms to the host-guest interactions is demonstrated by different colors.

## 13. Binding Constant Determination

### 13.1 General procedure

The binding constant ( $K_a$ ) for the formation of the host-guest complex in  $CD_3CN$  was determined through NMR spectroscopy. The  $K_a$  value for the  $C_{60}$  guest was ascertained by directly encapsulating the guest with 1 equiv of the empty cage *T-3* or *S4-4*. The binding constant for the equilibrium  $[C_{60} + H \rightleftharpoons C_{60}\subset H]$  was calculated using the Equation:

$$K_a(C_{60}) = \frac{[C_{60}\subset H]}{[C_{60}][H]} \quad (3)$$

Here, H represents *T-3* or *S4-4*. The saturated concentration of  $C_{60}$  ( $5.56 \times 10^{-7}$  M at 298 K) in acetonitrile was established based on prior literature.<sup>S24</sup> For the remaining fullerenes ( $C_{70}$ ,  $C_{76}$ ,  $C_{2v}-C_{78}$ ,  $C_{2v'}-C_{78}$ ), competitive encapsulation experiments relative to 1 equiv of  $C_{60}\subset T-3$  or  $C_{60}\subset S_4-4$  were employed to evaluate the respective  $K_a$  values. The apparent binding constant for the equilibrium  $[C_{60}\subset H + C_n \rightleftharpoons C_n\subset H + C_{60}]$  was calculated using the Equation:

$$K' = \frac{[C_n\subset H] \cdot [C_{60}]}{[C_{60}\subset H] \cdot [C_n]} \quad (4)$$

$$\therefore K_a(C_n) = K' \cdot K_a(C_{60}) \quad (5)$$



Here,  $n$  represents 70, 76, or 78. Considering the exceedingly low solubility of fullerenes in polar acetonitrile and for the sake of facilitating a comparative analysis of their relative binding capabilities, Equation 4 was simplified to  $K' \approx [C_n \subset H]/[C_{60} \subset H]$ . The mixture was heated at 70 °C for three days to ensure that it had reached equilibrium. Prior to NMR characterization, insoluble fullerenes were separated through centrifugation, with 1,3,5-trimethoxybenzene (TMB) serving as the internal standard to quantify the concentration of empty cages and host-guest complexes within the solution.

### 13.2 Binding constant for $C_{60}$ guest

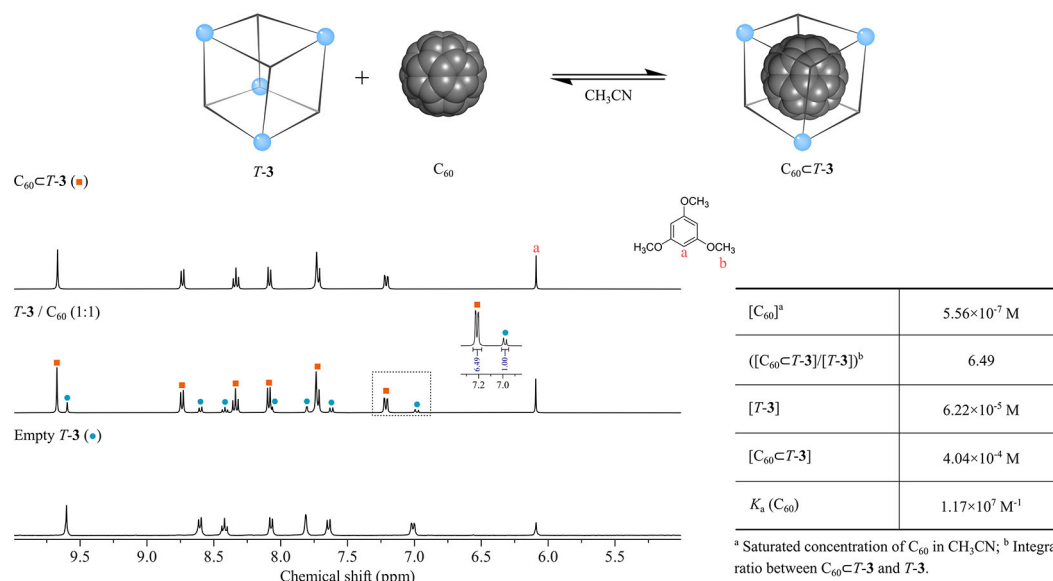

Fig. S134. Partial  $^1\text{H}$  NMR spectra (400 MHz, 298 K,  $\text{CD}_3\text{CN}$ ) for the guest-binding equilibrium of  $[C_{60} + T-3 \rightleftharpoons C_{60} \subset T-3]$  ( $[T-3]^0 = 4.66 \times 10^{-4} \text{ M}$ ,  $C_{60}$ , 1 equiv).  $K_a(C_{60}) = [C_{60} \subset T-3]/([C_{60}] \cdot [T-3])$

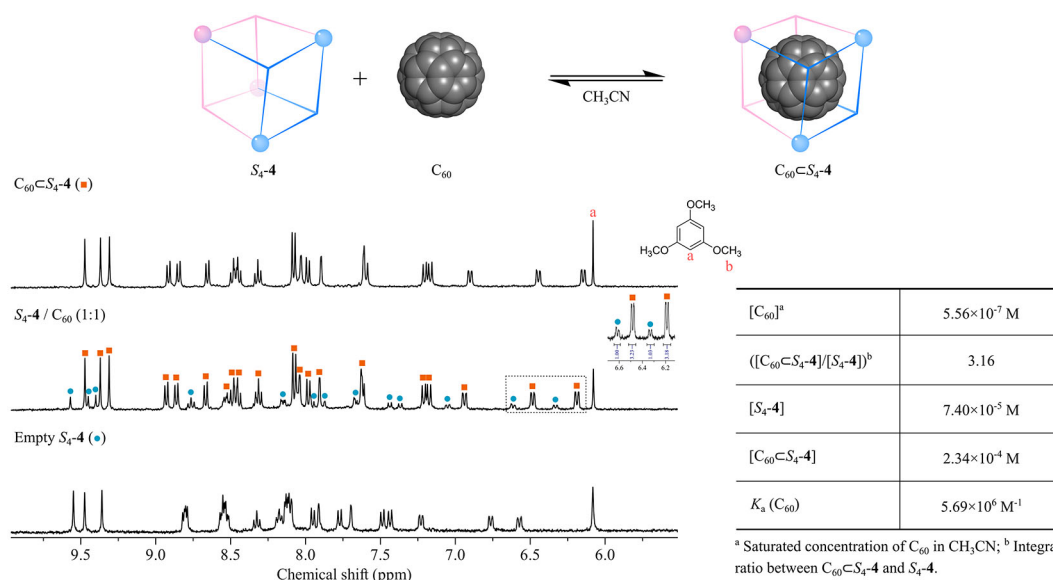

Fig. S135. Partial  $^1\text{H}$  NMR spectra (400 MHz, 298 K,  $\text{CD}_3\text{CN}$ ) for the guest-binding equilibrium of  $[C_{60} + S_4-4 \rightleftharpoons C_{60} \subset S_4-4]$  ( $[S_4-4]^0 = 3.08 \times 10^{-4} \text{ M}$ ,  $C_{60}$ , 1 equiv).  $K_a(C_{60}) = [C_{60} \subset S_4-4]/([C_{60}] \cdot [S_4-4])$

### 13.3 Binding constant for C<sub>70</sub> guest

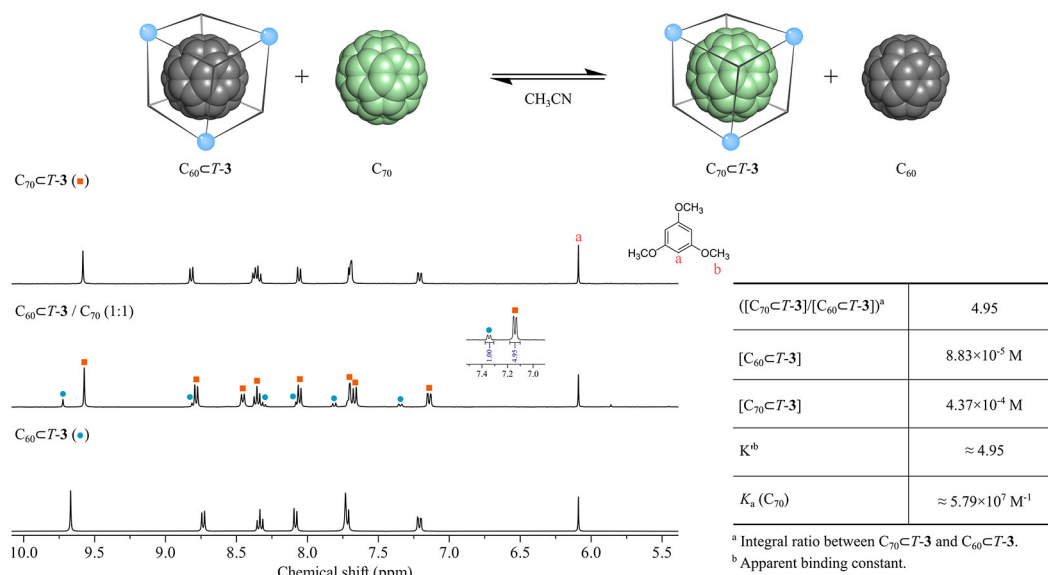

Fig. S136. Partial <sup>1</sup>H NMR spectra (400 MHz, 298 K, CD<sub>3</sub>CN) for the guest-binding equilibrium of  $[C_{60}C-T-3 + C_{70} \rightleftharpoons C_{70}C-T-3 + C_{60}]$  ( $[C_{60}C-T-3]^0 = 5.25 \times 10^{-4}$  M, C<sub>70</sub>, 1 equiv).  $K' = ([C_{70}C-T-3] \cdot [C_{60}]) / ([C_{60}C-T-3] \cdot [C_{70}]) \approx [C_{70}C-T-3] / [C_{60}C-T-3]$ ;  $K_a(C_{70}) = K' \cdot K_a(C_{60})$

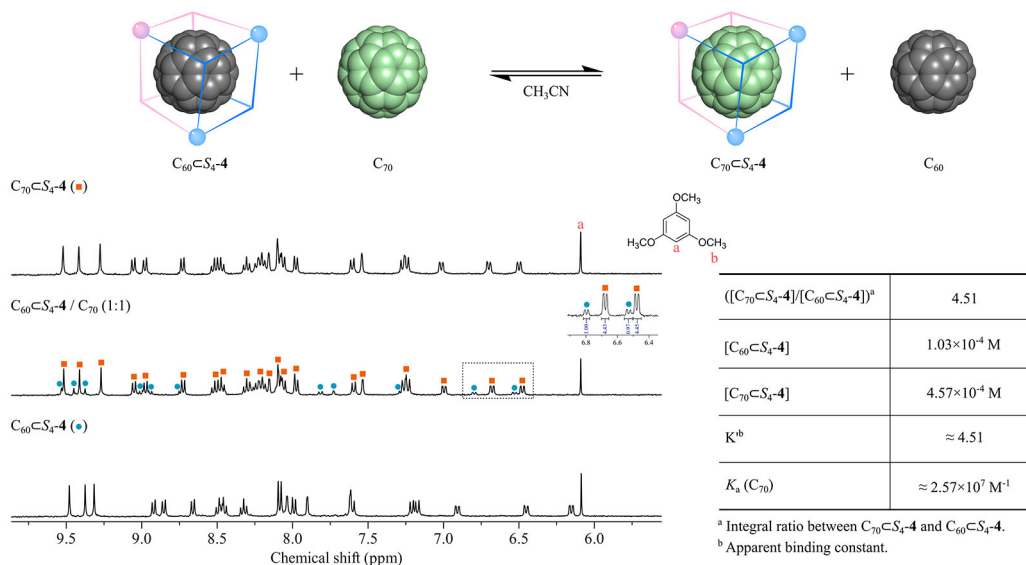

Fig. S137. Partial <sup>1</sup>H NMR spectra (400 MHz, 298 K, CD<sub>3</sub>CN) for the guest-binding equilibrium of  $[C_{60}C-S_4-4 + C_{70} \rightleftharpoons C_{70}C-S_4-4 + C_{60}]$  ( $[C_{60}C-S_4-4]^0 = 5.60 \times 10^{-4}$  M, C<sub>70</sub>, 1 equiv).  $K' = ([C_{70}C-S_4-4] \cdot [C_{60}]) / ([C_{60}C-S_4-4] \cdot [C_{70}]) \approx [C_{70}C-S_4-4] / [C_{60}C-S_4-4]$ ;  $K_a(C_{70}) = K' \cdot K_a(C_{60})$

### 13.4 Binding constant for C<sub>76</sub> guest

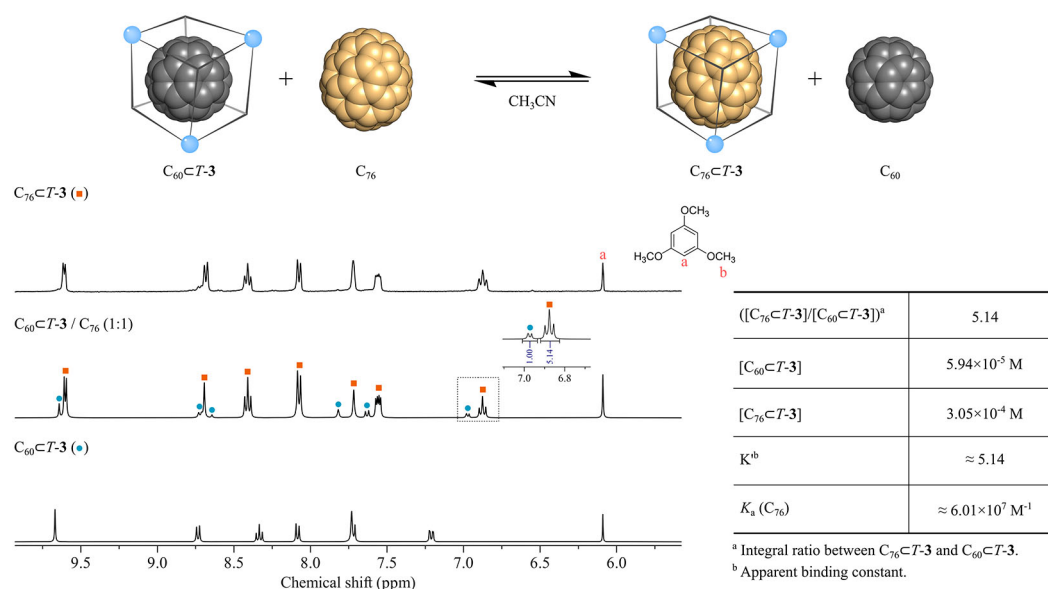

Fig. S138. Partial <sup>1</sup>H NMR spectra (400 MHz, 298 K, CD<sub>3</sub>CN) for the guest-binding equilibrium of  $[C_{60}\subset T-3 + C_{76} \rightleftharpoons C_{76}\subset T-3 + C_{60}]$  ( $[C_{60}\subset T-3]^0 = 3.64 \times 10^{-4}$  M, C<sub>76</sub>, 1 equiv).  $K' = ([C_{76}\subset T-3] \cdot [C_{60}]) / ([C_{60}\subset T-3] \cdot [C_{76}]) \approx [C_{76}\subset T-3] / [C_{60}\subset T-3]$ ;  $K_a(C_{76}) = K' \cdot K_a(C_{60})$

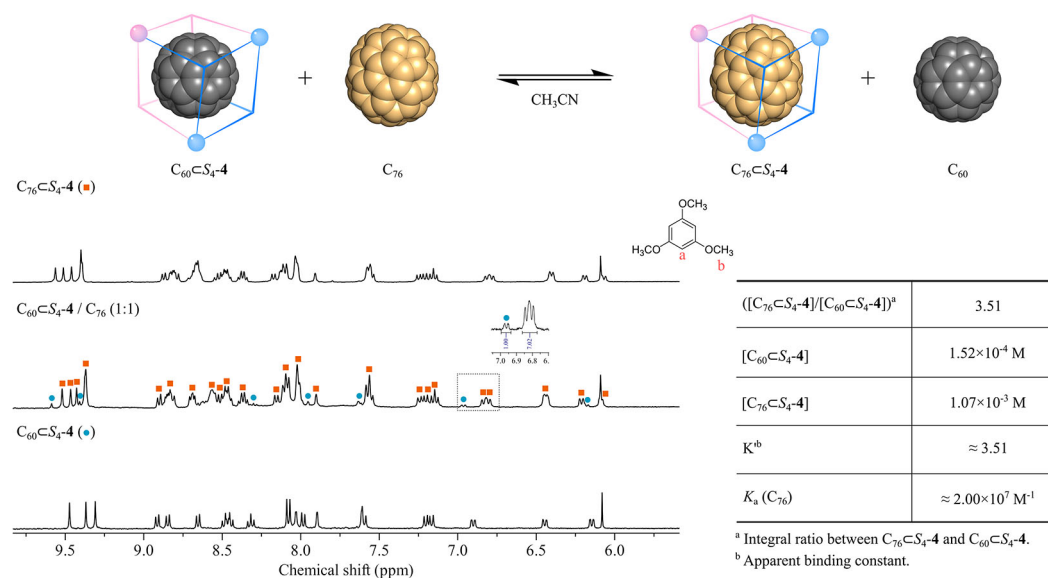

Fig. S139. Partial <sup>1</sup>H NMR spectra (400 MHz, 298 K, CD<sub>3</sub>CN) for the guest-binding equilibrium of  $[C_{60}\subset S_4-4 + C_{76} \rightleftharpoons C_{76}\subset S_4-4 + C_{60}]$  ( $[C_{60}\subset S_4-4]^0 = 1.22 \times 10^{-3}$  M, C<sub>76</sub>, 1 equiv).  $K' = ([C_{76}\subset S_4-4] \cdot [C_{60}]) / ([C_{60}\subset S_4-4] \cdot [C_{76}]) \approx [C_{76}\subset S_4-4] / [C_{60}\subset S_4-4]$ ;  $K_a(C_{76}) = K' \cdot K_a(C_{60})$

### 13.5 Binding constant for $C_{2v}$ - $C_{78}$ guest

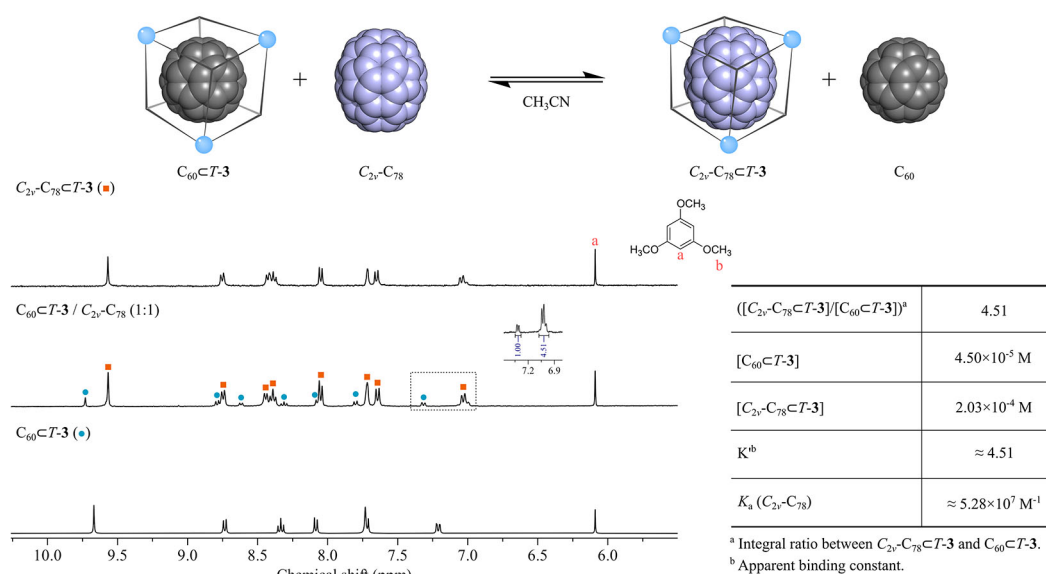

Fig. S140. Partial  $^1\text{H}$  NMR spectra (400 MHz, 298 K,  $\text{CD}_3\text{CN}$ ) for the guest-binding equilibrium of  $[C_{60}\text{<}T\text{-}3 + C_{2v}\text{-}C_{78} \rightleftharpoons C_{2v}\text{-}C_{78}\text{<}T\text{-}3 + C_{60}]$  ( $[C_{60}\text{<}T\text{-}3]^0 = 2.48 \times 10^{-4}$  M,  $C_{2v}\text{-}C_{78}$ , 1 equiv).  $K' = ([C_{2v}\text{-}C_{78}\text{<}T\text{-}3] \cdot [C_{60}]) / ([C_{60}\text{<}T\text{-}3] \cdot [C_{2v}\text{-}C_{78}]) \approx [C_{2v}\text{-}C_{78}\text{<}T\text{-}3] / [C_{60}\text{<}T\text{-}3]$ ;  $K_a(C_{2v}\text{-}C_{78}) = K' \cdot K_a(C_{60})$

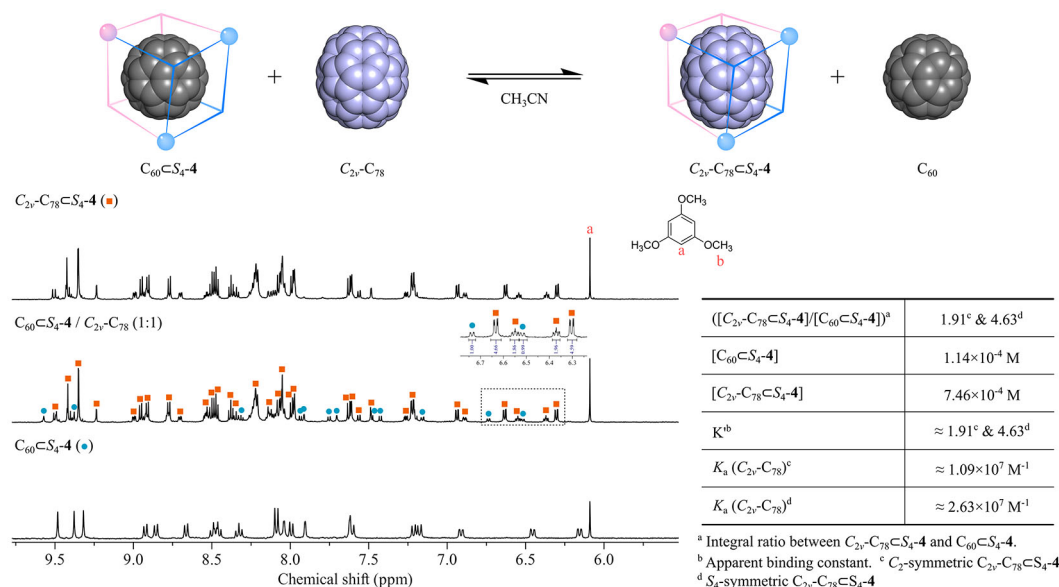

Fig. S141. Partial  $^1\text{H}$  NMR spectra (400 MHz, 298 K,  $\text{CD}_3\text{CN}$ ) for the guest-binding equilibrium of  $[C_{60}\text{<}S_4\text{-}4 + C_{2v}\text{-}C_{78} \rightleftharpoons C_{2v}\text{-}C_{78}\text{<}S_4\text{-}4 + C_{60}]$  ( $[C_{60}\text{<}S_4\text{-}4]^0 = 8.60 \times 10^{-4}$  M,  $C_{2v}\text{-}C_{78}$ , 1 equiv).  $K' = ([C_{2v}\text{-}C_{78}\text{<}S_4\text{-}4] \cdot [C_{60}]) / ([C_{60}\text{<}S_4\text{-}4] \cdot [C_{2v}\text{-}C_{78}]) \approx [C_{2v}\text{-}C_{78}\text{<}S_4\text{-}4] / [C_{60}\text{<}S_4\text{-}4]$ ;  $K_a(C_{2v}\text{-}C_{78}) = K' \cdot K_a(C_{60})$

### 13.6 Binding constant for $C_{2v}'$ - $C_{78}$ guest

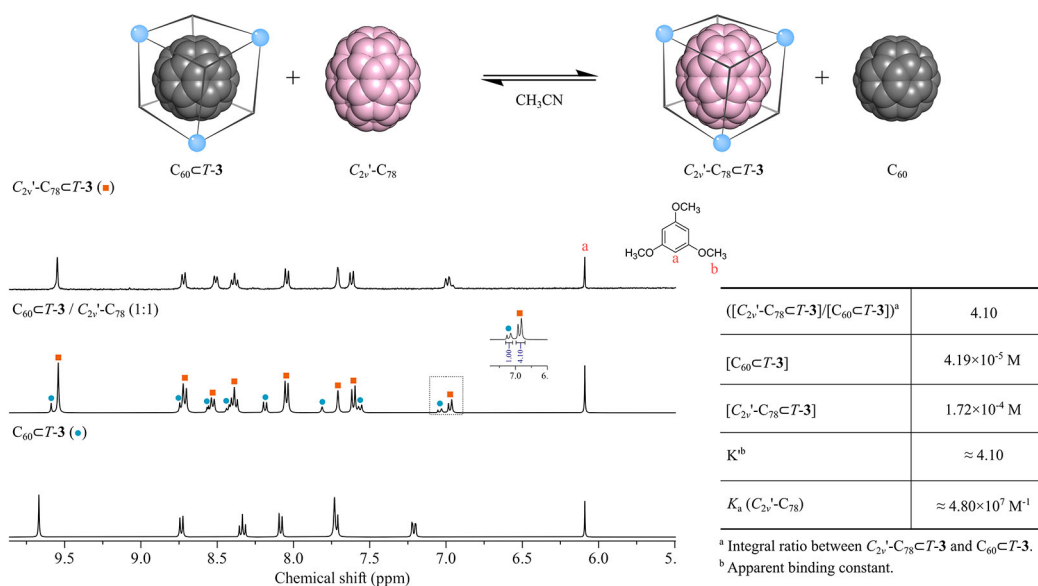

Fig. S142. Partial  $^1\text{H}$  NMR spectra (400 MHz, 298 K,  $\text{CD}_3\text{CN}$ ) for the guest-binding equilibrium of  $[C_{60} \subset T-3 + C_{2v}'-C_{78} \rightleftharpoons C_{2v}'-C_{78} \subset T-3 + C_{60}]$  ( $[C_{60} \subset T-3]^0 = 2.14 \times 10^{-4} \text{ M}$ ,  $C_{2v}'-C_{78}$ , 1 equiv).  $K' = ([C_{2v}'-C_{78} \subset T-3] \cdot [C_{60}]) / ([C_{60} \subset T-3] \cdot [C_{2v}'-C_{78}]) \approx [C_{2v}'-C_{78} \subset T-3] / [C_{60} \subset T-3]$ ;  $K_a (C_{2v}'-C_{78}) = K' \cdot K_a (C_{60})$

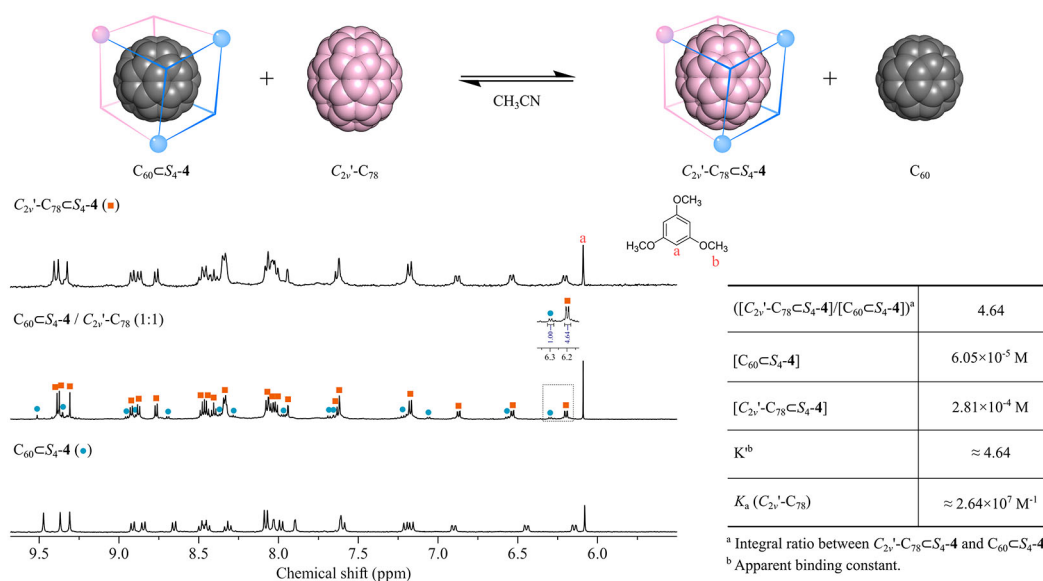

Fig. S143. Partial  $^1\text{H}$  NMR spectra (400 MHz, 298 K,  $\text{CD}_3\text{CN}$ ) for the guest-binding equilibrium of  $[C_{60} \subset S_4-4 + C_{2v}'-C_{78} \rightleftharpoons C_{2v}'-C_{78} \subset S_4-4 + C_{60}]$  ( $[C_{60} \subset S_4-4]^0 = 3.42 \times 10^{-4} \text{ M}$ ,  $C_{2v}'-C_{78}$ , 1 equiv).  $K' = ([C_{2v}'-C_{78} \subset S_4-4] \cdot [C_{60}]) / ([C_{60} \subset S_4-4] \cdot [C_{2v}'-C_{78}]) \approx [C_{2v}'-C_{78} \subset S_4-4] / [C_{60} \subset S_4-4]$ ;  $K_a (C_{2v}'-C_{78}) = K' \cdot K_a (C_{60})$

Table S14. Summary of the binding constants ( $K_a / \text{M}^{-1}$ ) of  $T-3 / S_4-4$  for fullerene guests

in CH<sub>3</sub>CN.

| $\begin{array}{c} C_n \\ \text{Cage} \end{array}$ | $C_{60}^i$         | $C_{70}^{ii}$      | $C_{76}^{ii}$      | $C_{2v}\text{-}C_{78}^{ii}$                       | $C_{2v'}\text{-}C_{78}^{ii}$ |
|---------------------------------------------------|--------------------|--------------------|--------------------|---------------------------------------------------|------------------------------|
| <i>T</i> - <b>3</b>                               | $1.17 \times 10^7$ | $5.79 \times 10^7$ | $6.01 \times 10^7$ | $5.28 \times 10^7$                                | $4.80 \times 10^7$           |
| <i>S</i> <sub>4</sub> - <b>4</b>                  | $5.69 \times 10^6$ | $2.57 \times 10^7$ | $2.00 \times 10^7$ | $1.09 \times 10^{7iii}$<br>$2.63 \times 10^{7iv}$ | $2.64 \times 10^7$           |

<sup>i</sup> The  $K_a$  values for the C<sub>60</sub> guest were ascertained by directly encapsulating the guest with 1 equiv of the empty cage *T*-**3** or *S*<sub>4</sub>-**4**. <sup>ii</sup> The  $K_a$  values for the C<sub>n</sub> (n = 70, 76, 78) guest were evaluated by using competitive encapsulation experiments relative to 1 equiv of C<sub>60</sub>⊂*T*-**3** or C<sub>60</sub>⊂*S*<sub>4</sub>-**4**. <sup>iii</sup> The  $K_a$  values for C<sub>2</sub>-symmetric C<sub>2v</sub>-C<sub>78</sub>⊂*S*<sub>4</sub>-**4**. <sup>iv</sup> The  $K_a$  values for *S*<sub>4</sub>-symmetric C<sub>2v</sub>-C<sub>78</sub>⊂*S*<sub>4</sub>-**4**.

## 14. Supplemental Figures and Tables for Crystal Data

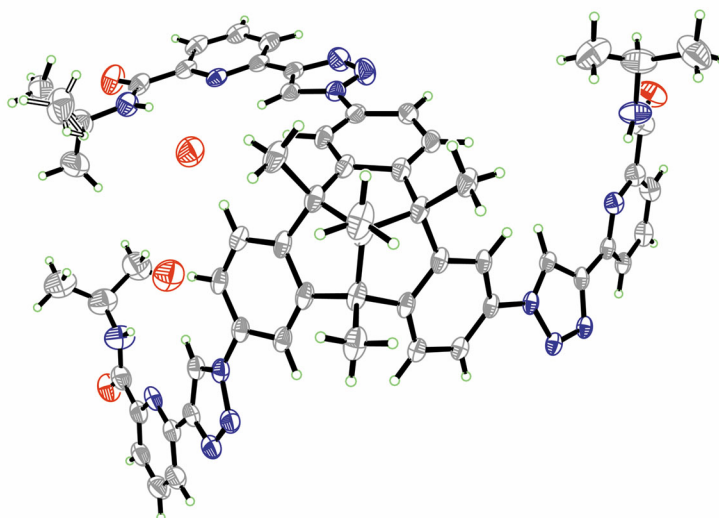

*Fig. S144.* Ortep-drawing of the asymmetric unit in the crystal structure of *C*<sub>3</sub>-**1** at 30% probability level.

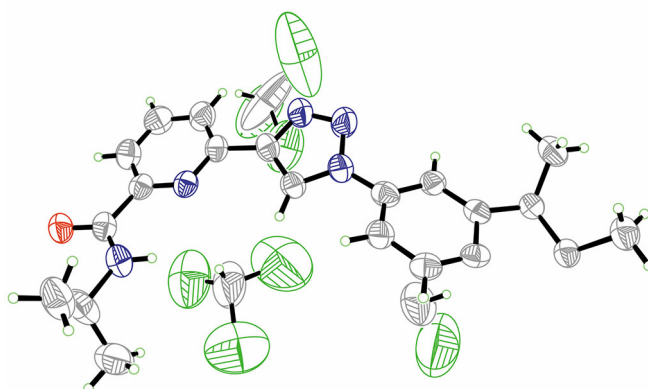

*Fig. S145.* Ortep-drawing of the asymmetric unit in the crystal structure of *P-1* at 30% probability level.

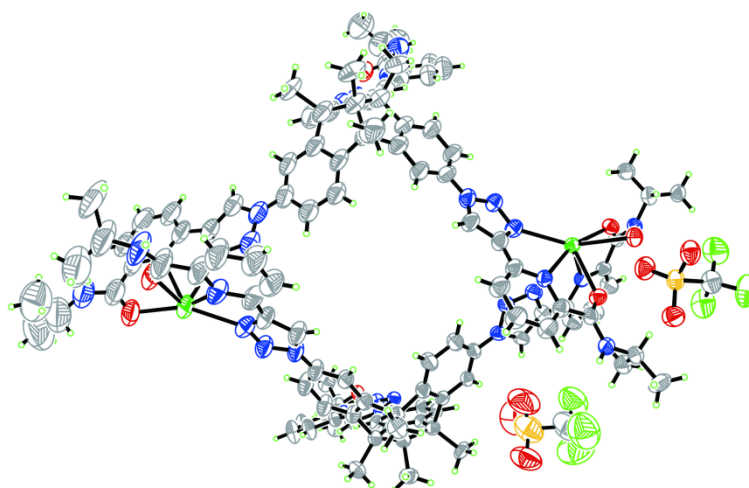

*Fig. S146.* Ortep-drawing of the asymmetric unit in the crystal structure of *T-3* at 30% probability level.



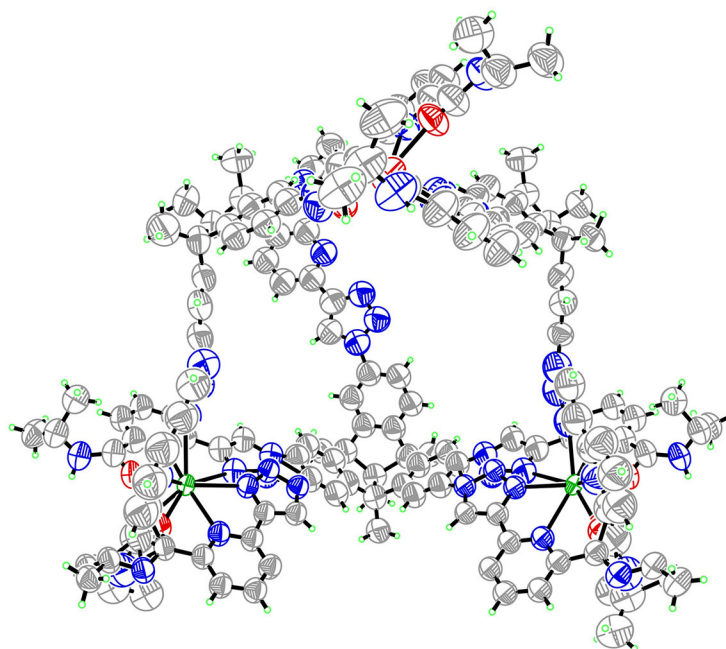

*Fig. S147.* Ortep-drawing of the asymmetric unit in the crystal structure of S<sub>4</sub>-4 at 30% probability level.

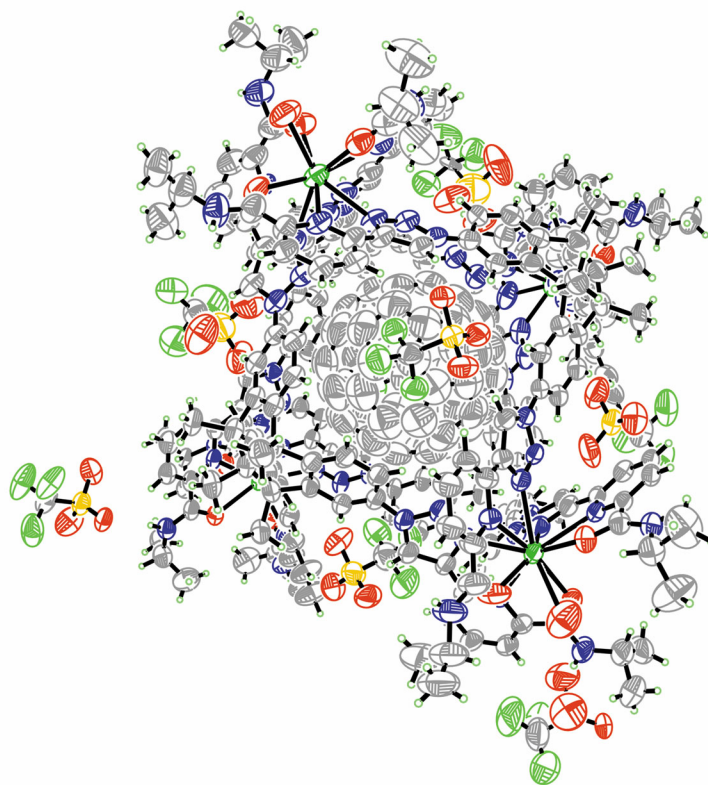

*Fig. S148.* Ortep-drawing of the asymmetric unit in the crystal structure of C<sub>60</sub>C-S<sub>4</sub>-4 at 30% probability level.



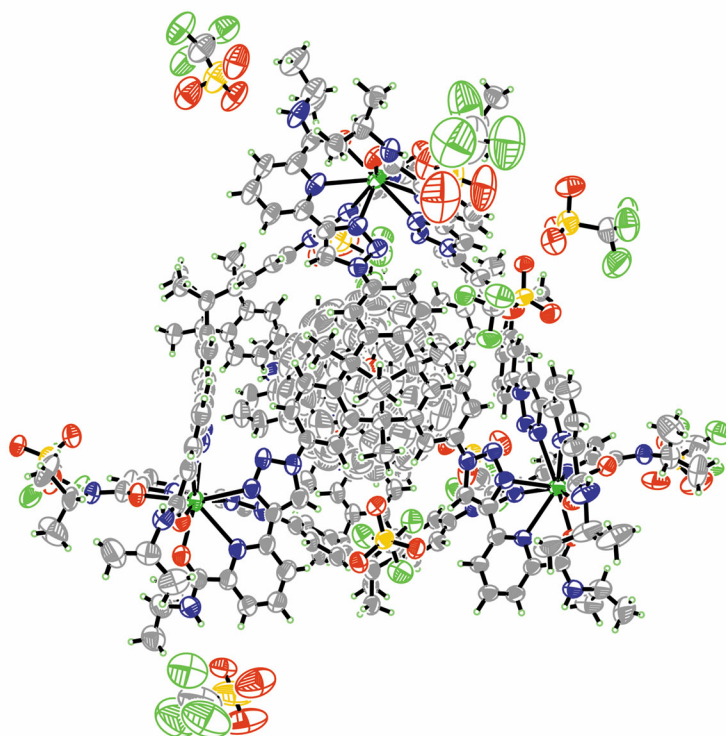

*Fig. S149.* Ortep-drawing of the asymmetric unit in the crystal structure of C<sub>70</sub>CS<sub>4</sub>-**4** at 30% probability level.

*Table S15.* Crystal data and structure refinement for *C*<sub>3</sub>-**1**.

|                                                     |                                                                 |                         |  |
|-----------------------------------------------------|-----------------------------------------------------------------|-------------------------|--|
| Identification code                                 | <i>C</i> <sub>3</sub> - <b>1</b> (2307962)                      |                         |  |
| Empirical formula                                   | C <sub>59</sub> H <sub>56</sub> N <sub>15</sub> O <sub>5</sub>  |                         |  |
| Formula weight                                      | 1055.19                                                         |                         |  |
| Temperature                                         | 140(2) K                                                        |                         |  |
| Wavelength                                          | 0.71073 Å                                                       |                         |  |
| Crystal system                                      | Triclinic                                                       |                         |  |
| Space group                                         | <i>P</i> -1                                                     |                         |  |
| Unit cell dimensions                                | <i>a</i> = 9.276(4) Å                                           | <i>α</i> = 102.897(12)° |  |
|                                                     | <i>b</i> = 17.092(7) Å                                          | <i>β</i> = 90.871(12)°  |  |
|                                                     | <i>c</i> = 20.259(8) Å                                          | <i>γ</i> = 105.056(12)° |  |
| Volume                                              | 3014(2) Å <sup>3</sup>                                          |                         |  |
| <i>Z</i>                                            | 2                                                               |                         |  |
| Density (calculated)                                | 1.163 Mg/m <sup>3</sup>                                         |                         |  |
| Absorption coefficient                              | 0.078 mm <sup>-1</sup>                                          |                         |  |
| <i>F</i> (000)                                      | 1110                                                            |                         |  |
| Crystal size                                        | 0.2 x 0.15 x 0.1 mm <sup>3</sup>                                |                         |  |
| Theta range for data collection                     | 2.291 to 25.027°.                                               |                         |  |
| Index ranges                                        | -11 ≤ <i>h</i> ≤ 11, -20 ≤ <i>k</i> ≤ 20, -24 ≤ <i>l</i> ≤ 24   |                         |  |
| Reflections collected                               | 82002                                                           |                         |  |
| Independent reflections                             | 10613 [ <i>R</i> (int) = 0.1521]                                |                         |  |
| Completeness to theta = 25.027°                     | 99.7 %                                                          |                         |  |
| Refinement method                                   | Full-matrix least-squares on <i>F</i> <sup>2</sup>              |                         |  |
| Data / restraints / parameters                      | 10613 / 1249 / 722                                              |                         |  |
| Goodness-of-fit on <i>F</i> <sup>2</sup>            | 1.104                                                           |                         |  |
| Final <i>R</i> indices [ <i>I</i> > 2σ( <i>I</i> )] | <i>R</i> <sub>1</sub> = 0.0942, <i>wR</i> <sub>2</sub> = 0.2849 |                         |  |
| <i>R</i> indices (all data)                         | <i>R</i> <sub>1</sub> = 0.1591, <i>wR</i> <sub>2</sub> = 0.3390 |                         |  |
| Extinction coefficient                              | n/a                                                             |                         |  |
| Largest diff. peak and hole                         | 0.798 and -0.438 e.Å <sup>-3</sup>                              |                         |  |

Table S16. Crystal data and structure refinement for *P*-1.

|                                          |                                                                                                  |
|------------------------------------------|--------------------------------------------------------------------------------------------------|
| Identification code                      | <i>P</i> -1 (2307963)                                                                            |
| Empirical formula                        | C <sub>66</sub> H <sub>64</sub> Cl <sub>2</sub> N <sub>15</sub> O <sub>3</sub>                   |
| Formula weight                           | 1859.77                                                                                          |
| Temperature                              | 293(2) K                                                                                         |
| Wavelength                               | 1.34139 Å                                                                                        |
| Crystal system                           | Trigonal                                                                                         |
| Space group                              | <i>R</i> 3                                                                                       |
| Unit cell dimensions                     | a = 23.5481(9) Å      α = 90°<br>b = 23.5481(9) Å      β = 90°<br>c = 12.9841(5) Å      γ = 120° |
| Volume                                   | 6235.3(5) Å <sup>3</sup>                                                                         |
| Z                                        | 3                                                                                                |
| Density (calculated)                     | 1.486 Mg/m <sup>3</sup>                                                                          |
| Absorption coefficient                   | 4.496 mm <sup>-1</sup>                                                                           |
| F(000)                                   | 2838                                                                                             |
| Crystal size                             | 0.32 x 0.25 x 0.16 mm <sup>3</sup>                                                               |
| Theta range for data collection          | 3.266 to 49.558°.                                                                                |
| Index ranges                             | -26 ≤ h ≤ 26, -26 ≤ k ≤ 26, -14 ≤ l ≤ 14                                                         |
| Reflections collected                    | 28757                                                                                            |
| Independent reflections                  | 4248 [R(int) = 0.1529]                                                                           |
| Completeness to theta = 49.558°          | 98.6 %                                                                                           |
| Refinement method                        | Full-matrix least-squares on <i>F</i> <sup>2</sup>                                               |
| Data / restraints / parameters           | 4155 / 31 / 316                                                                                  |
| Goodness-of-fit on <i>F</i> <sup>2</sup> | 1.468                                                                                            |
| Final R indices [I > 2σ(I)]              | <i>R</i> <sub>I</sub> = 0.1572, <i>wR</i> <sub>2</sub> = 0.3689                                  |
| R indices (all data)                     | <i>R</i> <sub>I</sub> = 0.1835, <i>wR</i> <sub>2</sub> = 0.3883                                  |
| Extinction coefficient                   | n/a                                                                                              |
| Largest diff. peak and hole              | 0.747 and -0.463 e.Å <sup>-3</sup>                                                               |

Table S17. Crystal data and structure refinement for *T-3*.

|                                          |                                                                                                                  |
|------------------------------------------|------------------------------------------------------------------------------------------------------------------|
| Identification code                      | <i>T-3</i> (2307965)                                                                                             |
| Empirical formula                        | C <sub>240</sub> H <sub>226</sub> F <sub>12</sub> La <sub>4</sub> N <sub>60</sub> O <sub>26</sub> S <sub>4</sub> |
| Formula weight                           | 5278.70                                                                                                          |
| Temperature                              | 273(2) K                                                                                                         |
| Wavelength                               | 0.71073 Å                                                                                                        |
| Crystal system                           | Orthorhombic                                                                                                     |
| Space group                              | <i>Pccn</i>                                                                                                      |
| Unit cell dimensions                     | a = 22.156(2) Å      α = 90°<br>b = 23.722(3) Å      β = 90°<br>c = 80.692(9) Å      γ = 90°                     |
| Volume                                   | 42411(8) Å <sup>3</sup>                                                                                          |
| Z                                        | 4                                                                                                                |
| Density (calculated)                     | 0.827 Mg/m <sup>3</sup>                                                                                          |
| Absorption coefficient                   | 0.465 mm <sup>-1</sup>                                                                                           |
| F(000)                                   | 10776                                                                                                            |
| Crystal size                             | 0.42 x 0.36 x 0.28 mm <sup>3</sup>                                                                               |
| Theta range for data collection          | 5.92 to 20.810°.                                                                                                 |
| Index ranges                             | -22 ≤ h ≤ 21, -23 ≤ k ≤ 23, -67 ≤ l ≤ 80                                                                         |
| Reflections collected                    | 77673                                                                                                            |
| Independent reflections                  | 21539 [R(int) = 0.2216]                                                                                          |
| Completeness to theta = 20.810°          | 97.0 %                                                                                                           |
| Refinement method                        | Full-matrix least-squares on <i>F</i> <sup>2</sup>                                                               |
| Data / restraints / parameters           | 21539 / 1945 / 1375                                                                                              |
| Goodness-of-fit on <i>F</i> <sup>2</sup> | 0.970                                                                                                            |
| Final R indices [I > 2σ(I)]              | <i>R</i> <sub>I</sub> = 0.1056, <i>wR</i> <sub>2</sub> = 0.2852                                                  |
| R indices (all data)                     | <i>R</i> <sub>I</sub> = 0.1576, <i>wR</i> <sub>2</sub> = 0.3254                                                  |
| Extinction coefficient                   | n/a                                                                                                              |
| Largest diff. peak and hole              | 0.738 and -1.508 e.Å <sup>-3</sup>                                                                               |

Table S18. Crystal data and structure refinement for **4**.

|                                          |                                                                                                |
|------------------------------------------|------------------------------------------------------------------------------------------------|
| Identification code                      | <b>4</b> (2307964)                                                                             |
| Empirical formula                        | C <sub>240</sub> H <sub>182</sub> La <sub>4</sub> N <sub>60</sub> O <sub>12</sub>              |
| Formula weight                           | 4654.09                                                                                        |
| Temperature                              | 278(2) K                                                                                       |
| Wavelength                               | 0.71073 Å                                                                                      |
| Crystal system                           | Monoclinic                                                                                     |
| Space group                              | <i>C2/m</i>                                                                                    |
| Unit cell dimensions                     | a = 62.910(10) Å     α = 90°<br>b = 36.326(6) Å     β = 125.26°<br>c = 36.322(5) Å     γ = 90° |
| Volume                                   | 67780(18) Å <sup>3</sup>                                                                       |
| Z                                        | 4                                                                                              |
| Density (calculated)                     | 0.456 Mg/m <sup>3</sup>                                                                        |
| Absorption coefficient                   | 0.272 mm <sup>-1</sup>                                                                         |
| F(000)                                   | 9464                                                                                           |
| Crystal size                             | 0.41 x 0.32 x 0.25 mm <sup>3</sup>                                                             |
| Theta range for data collection          | 2.060 to 14.737°                                                                               |
| Index ranges                             | -44 ≤ h ≤ 45, -25 ≤ k ≤ 25, -25 ≤ l ≤ 25                                                       |
| Reflections collected                    | 119381                                                                                         |
| Independent reflections                  | 13201 [R(int) = 0.3270]                                                                        |
| Completeness to theta = 14.737°          | 98.8 %                                                                                         |
| Refinement method                        | Full-matrix least-squares on <i>F</i> <sup>2</sup>                                             |
| Data / restraints / parameters           | 13201 / 5187 / 1613                                                                            |
| Goodness-of-fit on <i>F</i> <sup>2</sup> | 1.568                                                                                          |
| Final R indices [I > 2σ(I)]              | <i>R</i> <sub>I</sub> = 0.1580, <i>wR</i> <sub>2</sub> = 0.3955                                |
| R indices (all data)                     | <i>R</i> <sub>I</sub> = 0.2436, <i>wR</i> <sub>2</sub> = 0.4720                                |
| Extinction coefficient                   | n/a                                                                                            |
| Largest diff. peak and hole              | 1.083 and -0.763 e.Å <sup>-3</sup>                                                             |

*Table S19.* Crystal data and structure refinement for C<sub>60</sub>⊂S<sub>4</sub>-4.

|                                   |                                                                                                                  |               |
|-----------------------------------|------------------------------------------------------------------------------------------------------------------|---------------|
| Identification code               | C <sub>60</sub> ⊂S <sub>4</sub> -4 (2307966)                                                                     |               |
| Empirical formula                 | C <sub>304</sub> H <sub>228</sub> F <sub>24</sub> La <sub>4</sub> N <sub>60</sub> O <sub>38</sub> S <sub>8</sub> |               |
| Formula weight                    | 6597.54                                                                                                          |               |
| Temperature                       | 293(2) K                                                                                                         |               |
| Wavelength                        | 0.71073 Å                                                                                                        |               |
| Crystal system                    | Monoclinic                                                                                                       |               |
| Space group                       | C2/c                                                                                                             |               |
| Unit cell dimensions              | a = 39.925(8) Å                                                                                                  | α = 90°       |
|                                   | b = 41.557(8) Å                                                                                                  | β = 95.23(3)° |
|                                   | c = 41.117(8) Å                                                                                                  | γ = 90°       |
| Volume                            | 67936(23) Å <sup>3</sup>                                                                                         |               |
| Z                                 | 8                                                                                                                |               |
| Density (calculated)              | 1.290 Mg/m <sup>3</sup>                                                                                          |               |
| Absorption coefficient            | 0.626 mm <sup>-1</sup>                                                                                           |               |
| F(000)                            | 26784                                                                                                            |               |
| Crystal size                      | 0.4 x 0.1 x 0.1 mm <sup>3</sup>                                                                                  |               |
| Theta range for data collection   | 0.709 to 23.019°.                                                                                                |               |
| Index ranges                      | -30 ≤ h ≤ 43, -45 ≤ k ≤ 31, -45 ≤ l ≤ 45                                                                         |               |
| Reflections collected             | 86334                                                                                                            |               |
| Independent reflections           | 47013 [R(int) = 0.0624]                                                                                          |               |
| Completeness to theta = 23.019°   | 99.2 %                                                                                                           |               |
| Refinement method                 | Full-matrix least-squares on F <sup>2</sup>                                                                      |               |
| Data / restraints / parameters    | 47013 / 17225 / 3548                                                                                             |               |
| Goodness-of-fit on F <sup>2</sup> | 1.353                                                                                                            |               |
| Final R indices [I > 2σ(I)]       | R <sub>I</sub> = 0.1210, wR <sub>2</sub> = 0.3635                                                                |               |
| R indices (all data)              | R <sub>I</sub> = 0.1511, wR <sub>2</sub> = 0.3921                                                                |               |
| Extinction coefficient            | n/a                                                                                                              |               |
| Largest diff. peak and hole       | 1.786 and -1.427 e.Å <sup>-3</sup>                                                                               |               |

Table S20. Crystal data and structure refinement for C<sub>70</sub>C<sub>4</sub>-4.

|                                   |                                                                                                                   |               |
|-----------------------------------|-------------------------------------------------------------------------------------------------------------------|---------------|
| Identification code               | C <sub>70</sub> C <sub>4</sub> -4 (2307967)                                                                       |               |
| Empirical formula                 | C <sub>317</sub> H <sub>227</sub> F <sub>33</sub> La <sub>4</sub> N <sub>60</sub> O <sub>45</sub> S <sub>11</sub> |               |
| Formula weight                    | 7131.84                                                                                                           |               |
| Temperature                       | 293(2) K                                                                                                          |               |
| Wavelength                        | 0.71073 Å                                                                                                         |               |
| Crystal system                    | Monoclinic                                                                                                        |               |
| Space group                       | C2/c                                                                                                              |               |
| Unit cell dimensions              | a = 40.408(8) Å                                                                                                   | α = 90°       |
|                                   | b = 42.122(8) Å                                                                                                   | β = 96.44(3)° |
|                                   | c = 41.136(8) Å                                                                                                   | γ = 90°       |
| Volume                            | 69574(24) Å <sup>3</sup>                                                                                          |               |
| Z                                 | 8                                                                                                                 |               |
| Density (calculated)              | 1.362 Mg/m <sup>3</sup>                                                                                           |               |
| Absorption coefficient            | 0.639 mm <sup>-1</sup>                                                                                            |               |
| F(000)                            | 28880                                                                                                             |               |
| Crystal size                      | 0.25 x 0.2 x 0.15 mm <sup>3</sup>                                                                                 |               |
| Theta range for data collection   | 0.701 to 22.996°.                                                                                                 |               |
| Index ranges                      | 0 ≤ h ≤ 44, 0 ≤ k ≤ 46, -44 ≤ l ≤ 44                                                                              |               |
| Reflections collected             | 47685                                                                                                             |               |
| Independent reflections           | 47685 [R(int) = 0.041]                                                                                            |               |
| Completeness to theta = 22.996°   | 98.5 %                                                                                                            |               |
| Refinement method                 | Full-matrix least-squares on F <sup>2</sup>                                                                       |               |
| Data / restraints / parameters    | 47685 / 13065 / 3835                                                                                              |               |
| Goodness-of-fit on F <sup>2</sup> | 1.575                                                                                                             |               |
| Final R indices [I > 2σ(I)]       | R <sub>I</sub> = 0.1224, wR <sub>2</sub> = 0.3696                                                                 |               |
| R indices (all data)              | R <sub>I</sub> = 0.1437, wR <sub>2</sub> = 0.3877                                                                 |               |
| Extinction coefficient            | n/a                                                                                                               |               |
| Largest diff. peak and hole       | 1.411 and -1.120 e.Å <sup>-3</sup>                                                                                |               |

Table S21. Crystal data and structure refinement for  $C_{2v}(2)-C_{78}\cdot Ni^{II}(OEP)\cdot 2(C_6H_6)$ .

|                            |                                                     |
|----------------------------|-----------------------------------------------------|
| Identification code        | $C_{2v}(2)-C_{78}\cdot Ni^{II}(OEP)\cdot 2(C_6H_6)$ |
| CCDC                       | 2278920                                             |
| $T$ , K                    | 100(2)                                              |
| $\lambda$ , Å              | 0.71073                                             |
| Color / Habit              | black / block                                       |
| Crystal size, mm           | 0.28×0.25×0.23                                      |
| Empirical formula          | $C_{126}H_{56}N_4Ni$                                |
| FW                         | 1684.45                                             |
| Crystal system             | monoclinic                                          |
| Space group                | $C2/m$                                              |
| $a$ , Å                    | 25.450(7)                                           |
| $b$ , Å                    | 15.021(5)                                           |
| $c$ , Å                    | 19.704(7)                                           |
| $\alpha$ , deg             | 90                                                  |
| $\beta$ , deg              | 92.312(11)                                          |
| $\gamma$ , deg             | 90                                                  |
| $V$ , Å <sup>3</sup>       | 7526(4)                                             |
| $Z$                        | 4                                                   |
| $\rho$ , g/cm <sup>3</sup> | 1.487                                               |
| $\mu$ , mm <sup>-1</sup>   | 0.326                                               |
| $R_1$ (all data)           | 0.0738                                              |
| $wR_2$ (all data)          | 0.2395                                              |



Table S22. Crystal data and structure refinement for  $C_{2v}(3)-C_{78}\cdot Ni^{II}(OEP)\cdot 2(C_6H_6)$ .

|                            |                                                     |
|----------------------------|-----------------------------------------------------|
| Identification code        | $C_{2v}(3)-C_{78}\cdot Ni^{II}(OEP)\cdot 2(C_6H_6)$ |
| CCDC                       | 2278921                                             |
| $T$ , K                    | 100(2)                                              |
| $\lambda$ , Å              | 0.71073                                             |
| Color / Habit              | black / block                                       |
| Crystal size, mm           | 0.14×0.10×0.10                                      |
| Empirical formula          | $C_{126}H_{56}N_4Ni$                                |
| FW                         | 1684.45                                             |
| Crystal system             | monoclinic                                          |
| Space group                | $C2/m$                                              |
| $a$ , Å                    | 25.412(4)                                           |
| $b$ , Å                    | 15.089(3)                                           |
| $c$ , Å                    | 19.729(4)                                           |
| $\alpha$ , deg             | 90                                                  |
| $\beta$ , deg              | 93.213(4)                                           |
| $\gamma$ , deg             | 90                                                  |
| $V$ , Å <sup>3</sup>       | 7553(2)                                             |
| $Z$                        | 4                                                   |
| $\rho$ , g/cm <sup>3</sup> | 1.481                                               |
| $\mu$ , mm <sup>-1</sup>   | 0.325                                               |
| $R_1$ (all data)           | 0.0956                                              |
| $wR_2$ (all data)          | 0.2826                                              |

## 15. References

- S1. Maglic, J. B.; Lavendomme, R. MoloVol: an easy-to-use program for analyzing cavities, volumes and surface areas of chemical structures. *J. Appl. Crystallogr.* **2022**, *55*, 1033-1044.
- S2. PyMOL 2.5 program, a user-sponsored molecular visualization system (<https://pymol.org/2/>).
- S3. APEX III, Data collection software (version 2017.3).
- S4. Agilent Technologies, CrysAlisPro v. 1.171.36.28, **2013**.
- S5. Sheldrick, G. M. *Acta Crystallogr. Sect. A*, **2008**, *64*, 112.
- S6. van der Sluis, P., and Spek, A.L. BYPASS: an effective method for the refinement of crystal structures containing disordered solvent regions. *Acta Cryst.* 1990, A46, 194-201.
- S7. Spek, A. L. Single-Crystal Structure Validation with the Program PLATON. *J. Appl. Crystallogr.* **2003**, *36*, 7.
- S8. T. K. Ronson, J. P. Carpenter and J. R. Nitschke, *Chem.* **2022**, *8*, 557-568.
- S9. D. Kratzert, J.J. Holstein, I. Krossing, *J. Appl. Cryst.* **2015**, *48*, 933-938.
- S10. Kuck, D.; Lindenthal, T.; Schuster, A. Benzoanellated centropolyquinanes, 11. Synthesis of tribenzotriquinacene and some centro-substituted derivatives. *Chemische Berichte* **1992**, *125*, 1449-1460.
- S11. Beaudoin, D.; Rominger, F.; Mastalerz, M. Efficient, Scalable syntheses of important intermediates in tribenzotriquinacene chemistry. *Synthesis-Stuttgart* **2015**, *47*, 3846-3848.
- S12. Beaudoin, D.; Rominger, F.; Mastalerz, M. Synthesis and chiral Resolution of C<sub>3</sub>-symmetric tribenzotriquinacenes. *Eur. J. Org. Chem.* **2016**, *2016*, 4470-4472.
- S13. Guo, X.-Q.; Zhou, L.-P.; Cai, L.-X.; Sun, Q.-F. Self-assembled bright luminescent lanthanide-organic polyhedra for ratiometric temperature sensing. *Chem. Eur. J.* **2018**, *24*, 6936-6940.
- S14. Y. Li, A. H. Flood, Pure C—H hydrogen bonding to chloride ions: a preorganized and rigid macrocyclic receptor. *Angew. Chem. Int. Ed.* **2008**, *47*, 2649-2652.
- S15. Sabirov, D. S.; Garipova, R. R. The increase in the fullerene cage volume upon its chemical functionalization. *Fuller. Nano. Tub. Car. N.* **2019**, *27*, 702-709.
- S16. Eppe, L.; Amsharov, K. Y.; Jansen, M. Structures of the individual higher fullerene isomers C<sub>76</sub>-D<sub>2</sub> and C<sub>78</sub>(2)-C<sub>2v</sub> in cocrystals with Ag- and Cu-tetraphenylporphyrines. *Fuller. Nano. Tub. Car. N.* **2009**, *17*, 67-77.
- S17. M. A. Spackman and P. G. Byrom, *Chem. Phys. Lett.*, **1997**, *267*, 215-220;

- S18. J. J. McKinnon, A. S. Mitchell and M. A. Spackman, *Chem.–Eur. J.*, **1998**, *4*, 2136–2141.
- S19. Spackman, P. R.; Turner, M. J.; McKinnon, J. J.; Wolff, S. K.; Grimwood, D. J.; Jayatilaka, D.; Spackman, M. A. CrystalExplorer: a program for Hirshfeld surface analysis, visualization and quantitative analysis of molecular crystals. *J. Appl. Crystallogr.* **2021**, *54*, 1006-1011.
- S20. M. A. Spackman, J. J. McKinnon, *CrystEngComm.* 2002, *4*, 378.
- S21. Lefebvre, C.; Rubez, G.; Khartabil, H.; Boisson, J.-C.; Contreras-García, J.; Hénon, E. Accurately extracting the signature of intermolecular interactions present in the NCI plot of the reduced density gradient versus electron density. *Phys. Chem. Chem. Phys.* **2017**, *19*, 17928-17936.
- S22. Lu, T.; Chen, F. Multiwfn: A multifunctional wavefunction analyzer. *J. Comput. Chem.* **2012**, *33*, 580-592.
- S23. Humphrey, W.; Dalke, A.; Schulten, K. VMD: Visual molecular dynamics. *J. Mol. Graphics.* **1996**, *14*, 33-38.
- S24. K. N. Semenov, N. A. Charykov, V. A. Keskinov, A. K. Piartman, A. A. Blokhin and A. A. Kopyrin, *J. of Chem. Eng. Data.* **2010**, *55*, 13-36.
